# Supplementary material
Source: publisher site journal article supplement (https://www.spandidos-publications.com/8664/downloadSupplementary)
Supplement: Supplementary file 1 [file downloadSupplementary]

## Sheet: KEGG
Table SII. KEGG pathway enrichment analysis by cluster.
Cluster	Terms	Mapping	All.mapping	Background	All.background	Fold.enrich	P-value	Protein.IDs	Type
Cluster1	Alzheimer disease	1	22	8	108	0.61	0.849	O35625	KEGG
Cluster1	Aminoacyl-tRNA biosynthesis	1	22	1	108	4.91	0.204	Q99MN1	KEGG
Cluster1	Axon guidance	1	22	7	108	0.7	0.807	Q8BTW9	KEGG
Cluster1	Basal cell carcinoma	1	22	2	108	2.45	0.367	O35625	KEGG
Cluster1	Breast cancer	1	22	6	108	0.82	0.754	O35625	KEGG
Cluster1	Calcium signaling pathway	1	22	4	108	1.23	0.604	Q8BWJ3	KEGG
Cluster1	Cell cycle	1	22	1	108	4.91	0.204	P49717	KEGG
Cluster1	Colorectal cancer	1	22	5	108	0.98	0.688	O35625	KEGG
Cluster1	Cushing syndrome	1	22	4	108	1.23	0.604	O35625	KEGG
Cluster1	DNA replication	2	22	3	108	3.27	0.105	P33611 P49717	KEGG
Cluster1	Endometrial cancer	1	22	3	108	1.64	0.499	O35625	KEGG
Cluster1	ErbB signaling pathway	1	22	5	108	0.98	0.688	Q8BTW9	KEGG
Cluster1	Ferroptosis	1	22	1	108	4.91	0.204	P09528	KEGG
Cluster1	Focal adhesion	1	22	6	108	0.82	0.754	Q8BTW9	KEGG
Cluster1	Gap junction	1	22	5	108	0.98	0.688	Q61083	KEGG
Cluster1	Gastric cancer	1	22	4	108	1.23	0.604	O35625	KEGG
Cluster1	Glucagon signaling pathway	1	22	3	108	1.64	0.499	Q8BWJ3	KEGG
Cluster1	GnRH signaling pathway	1	22	7	108	0.7	0.807	Q61083	KEGG
Cluster1	Hepatocellular carcinoma	1	22	4	108	1.23	0.604	O35625	KEGG
Cluster1	Hippo signaling pathway	1	22	5	108	0.98	0.688	O35625	KEGG
Cluster1	Human immunodeficiency virus 1 infection	1	22	5	108	0.98	0.688	Q8BTW9	KEGG
Cluster1	Human papillomavirus infection	1	22	6	108	0.82	0.754	O35625	KEGG
Cluster1	Insulin signaling pathway	1	22	7	108	0.7	0.807	Q8BWJ3	KEGG
Cluster1	Lysine degradation	1	22	1	108	4.91	0.204	E9Q5F9	KEGG
Cluster1	MAPK signaling pathway	1	22	9	108	0.55	0.882	Q61083	KEGG
Cluster1	MicroRNAs in cancer	1	22	8	108	0.61	0.849	Q8BTW9	KEGG
Cluster1	Mineral absorption	1	22	1	108	4.91	0.204	P09528	KEGG
Cluster1	mRNA surveillance pathway	1	22	6	108	0.82	0.754	Q52KI8	KEGG
Cluster1	Necroptosis	2	22	3	108	3.27	0.105	P09528 Q8K1M6	KEGG
Cluster1	NOD-like receptor signaling pathway	1	22	7	108	0.7	0.807	Q8K1M6	KEGG
Cluster1	Pathways in cancer	1	22	8	108	0.61	0.849	O35625	KEGG
Cluster1	Phagosome	1	22	1	108	4.91	0.204	Q8R1Q8	KEGG
Cluster1	Protein processing in endoplasmic reticulum	2	22	5	108	1.96	0.268	P09103 Q99PL5	KEGG
Cluster1	Ras signaling pathway	1	22	6	108	0.82	0.754	Q8BTW9	KEGG
Cluster1	Regulation of actin cytoskeleton	1	22	9	108	0.55	0.882	Q8BTW9	KEGG
Cluster1	Renal cell carcinoma	1	22	4	108	1.23	0.604	Q8BTW9	KEGG
Cluster1	Ribosome	2	22	2	108	4.91	0.04	P62751 Q9CR57	KEGG
Cluster1	Ribosome biogenesis in eukaryotes	1	22	5	108	0.98	0.688	O08784	KEGG
Cluster1	RNA transport	1	22	8	108	0.61	0.849	Q52KI8	KEGG
Cluster1	Salmonella infection	1	22	5	108	0.98	0.688	Q8R1Q8	KEGG
Cluster1	Spinocerebellar ataxiaNew!	1	22	4	108	1.23	0.604	Q924A2	KEGG
Cluster1	Spliceosome	3	22	9	108	1.64	0.267	Q4FK66 Q6NV83 Q9R1C7	KEGG
Cluster1	T cell receptor signaling pathway	1	22	5	108	0.98	0.688	Q8BTW9	KEGG
Cluster1	Tight junction	1	22	11	108	0.45	0.929	Q9Z0U1	KEGG
Cluster1	TNF signaling pathway	1	22	4	108	1.23	0.604	Q8K1M6	KEGG
Cluster1	Vasopressin-regulated water reabsorption	1	22	1	108	4.91	0.204	Q8R1Q8	KEGG
Cluster1	Wnt signaling pathway	1	22	3	108	1.64	0.499	O35625	KEGG
Cluster2	Adherens junction	1	21	6	108	0.86	0.736	Q9QZQ1	KEGG
Cluster2	Alzheimer disease	1	21	8	108	0.64	0.834	Q9Z0F8	KEGG
Cluster2	Amyotrophic lateral sclerosis (ALS)	3	21	6	108	2.57	0.0863	P60521 P62821 Q3UYV9	KEGG
Cluster2	Apelin signaling pathway	1	21	6	108	0.86	0.736	P60521	KEGG
Cluster2	Autophagy - animal	3	21	7	108	2.2	0.132	P60521 P62821 Q99K70	KEGG
Cluster2	Autophagy - other	1	21	1	108	5.14	0.194	P60521	KEGG
Cluster2	Bacterial invasion of epithelial cells	1	21	1	108	5.14	0.194	Q8BUR4	KEGG
Cluster2	Bladder cancer	1	21	3	108	1.71	0.481	Q61851	KEGG
Cluster2	Breast cancer	1	21	6	108	0.86	0.736	O09000	KEGG
Cluster2	Calcium signaling pathway	1	21	4	108	1.29	0.585	Q61851	KEGG
Cluster2	cAMP signaling pathway	1	21	5	108	1.03	0.669	Q9QZQ1	KEGG
Cluster2	Central carbon metabolism in cancer	1	21	3	108	1.71	0.481	Q61851	KEGG
Cluster2	EGFR tyrosine kinase inhibitor resistance	1	21	4	108	1.29	0.585	Q61851	KEGG
Cluster2	Endocrine resistance	1	21	4	108	1.29	0.585	O09000	KEGG
Cluster2	Endocytosis	1	21	5	108	1.03	0.669	Q61851	KEGG
Cluster2	Estrogen signaling pathway	1	21	4	108	1.29	0.585	O09000	KEGG
Cluster2	Fc gamma R-mediated phagocytosis	1	21	6	108	0.86	0.736	Q8BUR4	KEGG
Cluster2	Focal adhesion	1	21	6	108	0.86	0.736	Q8BUR4	KEGG
Cluster2	FoxO signaling pathway	1	21	7	108	0.73	0.79	P60521	KEGG
Cluster2	GABAergic synapse	1	21	1	108	5.14	0.194	P60521	KEGG
Cluster2	Hippo signaling pathway	1	21	5	108	1.03	0.669	E9Q9R9	KEGG
Cluster2	Kaposi sarcoma-associated herpesvirus infection	1	21	4	108	1.29	0.585	P60521	KEGG
Cluster2	Legionellosis	1	21	1	108	5.14	0.194	P62821	KEGG
Cluster2	Leukocyte transendothelial migration	1	21	2	108	2.57	0.353	Q9QZQ1	KEGG
Cluster2	MAPK signaling pathway	1	21	9	108	0.57	0.869	Q61851	KEGG
Cluster2	MicroRNAs in cancer	1	21	8	108	0.64	0.834	Q61851	KEGG
Cluster2	Mitophagy - animal	1	21	3	108	1.71	0.481	P60521	KEGG
Cluster2	mRNA surveillance pathway	2	21	6	108	1.71	0.331	Q3UYV9 Q9D824	KEGG
Cluster2	mTOR signaling pathway	1	21	5	108	1.03	0.669	Q99K70	KEGG
Cluster2	NOD-like receptor signaling pathway	1	21	7	108	0.73	0.79	P60521	KEGG
Cluster2	Notch signaling pathway	1	21	2	108	2.57	0.353	Q9Z0F8	KEGG
Cluster2	Pathways in cancer	2	21	8	108	1.29	0.485	O09000 Q61851	KEGG
Cluster2	PI3K-Akt signaling pathway	1	21	6	108	0.86	0.736	Q61851	KEGG
Cluster2	Protein processing in endoplasmic reticulum	1	21	5	108	1.03	0.669	Q9ES00	KEGG
Cluster2	Rap1 signaling pathway	2	21	5	108	2.06	0.249	Q61851 Q9QZQ1	KEGG
Cluster2	Ras signaling pathway	2	21	6	108	1.71	0.331	Q61851 Q9QZQ1	KEGG
Cluster2	Regulation of actin cytoskeleton	2	21	9	108	1.14	0.555	Q61851 Q8BUR4	KEGG
Cluster2	Ribosome biogenesis in eukaryotes	2	21	5	108	2.06	0.249	O08784 Q6PGG6	KEGG
Cluster2	RNA transport	2	21	8	108	1.29	0.485	Q05D44 Q3UYV9	KEGG
Cluster2	SNARE interactions in vesicular transport	1	21	1	108	5.14	0.194	Q9JKK1	KEGG
Cluster2	Spinocerebellar ataxiaNew!	1	21	4	108	1.29	0.585	Q924A2	KEGG
Cluster2	Spliceosome	3	21	9	108	1.71	0.241	Q3UYV9 Q6NV83 Q9D0E1	KEGG
Cluster2	Thyroid hormone signaling pathway	2	21	6	108	1.71	0.331	O09000 Q8VCD5	KEGG
Cluster2	Tight junction	2	21	11	108	0.94	0.675	Q9QZQ1 Q9Z0U1	KEGG
Cluster2	Ubiquitin mediated proteolysis	1	21	4	108	1.29	0.585	Q9ES00	KEGG
Cluster2	Yersinia infection	1	21	5	108	1.03	0.669	Q8BUR4	KEGG
Cluster3	Alanine, aspartate and glutamate metabolism	1	15	1	108	7.2	0.139	B2RQC6	KEGG
Cluster3	alpha-Linolenic acid metabolism	1	15	1	108	7.2	0.139	P47713	KEGG
Cluster3	Alzheimer disease	1	15	8	108	0.9	0.711	Q9CR00	KEGG
Cluster3	Amyotrophic lateral sclerosis (ALS)	2	15	6	108	2.4	0.194	Q9CR00 Q9ERU9	KEGG
Cluster3	Arachidonic acid metabolism	1	15	1	108	7.2	0.139	P47713	KEGG
Cluster3	Axon guidance	1	15	7	108	1.03	0.66	P45591	KEGG
Cluster3	Choline metabolism in cancer	1	15	4	108	1.8	0.455	P47713	KEGG
Cluster3	Ether lipid metabolism	1	15	1	108	7.2	0.139	P47713	KEGG
Cluster3	Fc epsilon RI signaling pathway	1	15	3	108	2.4	0.364	P47713	KEGG
Cluster3	Fc gamma R-mediated phagocytosis	2	15	6	108	2.4	0.194	P45591 P47713	KEGG
Cluster3	Fluid shear stress and atherosclerosis	1	15	3	108	2.4	0.364	Q60875	KEGG
Cluster3	Focal adhesion	1	15	6	108	1.2	0.602	Q91YM2	KEGG
Cluster3	Glutamatergic synapse	1	15	3	108	2.4	0.364	P47713	KEGG
Cluster3	Glycerophospholipid metabolism	1	15	1	108	7.2	0.139	P47713	KEGG
Cluster3	GnRH signaling pathway	1	15	7	108	1.03	0.66	P47713	KEGG
Cluster3	Herpes simplex virus 1 infection	2	15	3	108	4.8	0.0501	Q6PDM2 Q8R0T2	KEGG
Cluster3	Human immunodeficiency virus 1 infection	1	15	5	108	1.44	0.534	P45591	KEGG
Cluster3	Huntington disease	1	15	2	108	3.6	0.26	Q9CR00	KEGG
Cluster3	IL-17 signaling pathway	1	15	5	108	1.44	0.534	Q6PDM2	KEGG
Cluster3	Inflammatory mediator regulation of TRP channels	1	15	1	108	7.2	0.139	P47713	KEGG
Cluster3	Insulin resistance	1	15	4	108	1.8	0.455	Q8BYJ6	KEGG
Cluster3	Jak-STAT signaling pathway	1	15	1	108	7.2	0.139	Q06180	KEGG
Cluster3	Leukocyte transendothelial migration	1	15	2	108	3.6	0.26	Q91YM2	KEGG
Cluster3	Linoleic acid metabolism	1	15	1	108	7.2	0.139	P47713	KEGG
Cluster3	Long-term depression	1	15	3	108	2.4	0.364	P47713	KEGG
Cluster3	MAPK signaling pathway	1	15	9	108	0.8	0.754	P47713	KEGG
Cluster3	Mitophagy - animal	1	15	3	108	2.4	0.364	Q9R210	KEGG
Cluster3	mRNA surveillance pathway	1	15	6	108	1.2	0.602	Q52KI8	KEGG
Cluster3	Necroptosis	1	15	3	108	2.4	0.364	P47713	KEGG
Cluster3	Ovarian steroidogenesis	1	15	1	108	7.2	0.139	P47713	KEGG
Cluster3	Oxytocin signaling pathway	1	15	7	108	1.03	0.66	P47713	KEGG
Cluster3	Parkinson disease	1	15	1	108	7.2	0.139	Q9CR00	KEGG
Cluster3	Pertussis	1	15	4	108	1.8	0.455	P45591	KEGG
Cluster3	Phospholipase D signaling pathway	1	15	3	108	2.4	0.364	P47713	KEGG
Cluster3	Platelet activation	2	15	4	108	3.6	0.092	P47713 Q91YM2	KEGG
Cluster3	Prion diseases	1	15	3	108	2.4	0.364	Q9CR00	KEGG
Cluster3	Proteasome	1	15	1	108	7.2	0.139	Q9CR00	KEGG
Cluster3	Pyrimidine metabolism	1	15	1	108	7.2	0.139	B2RQC6	KEGG
Cluster3	Ras signaling pathway	1	15	6	108	1.2	0.602	P47713	KEGG
Cluster3	Regulation of actin cytoskeleton	2	15	9	108	1.6	0.364	P45591 Q91YM2	KEGG
Cluster3	RNA transport	2	15	8	108	1.8	0.307	Q52KI8 Q9ERU9	KEGG
Cluster3	Serotonergic synapse	1	15	3	108	2.4	0.364	P47713	KEGG
Cluster3	Spinocerebellar ataxiaNew!	1	15	4	108	1.8	0.455	Q9CR00	KEGG
Cluster3	Spliceosome	3	15	9	108	2.4	0.109	Q4FK66 Q6PDM2 Q923D5	KEGG
Cluster3	Thyroid hormone signaling pathway	1	15	6	108	1.2	0.602	Q8BYJ6	KEGG
Cluster3	Tight junction	1	15	11	108	0.65	0.823	Q60875	KEGG
Cluster3	Vascular smooth muscle contraction	1	15	3	108	2.4	0.364	P47713	KEGG
Cluster3	VEGF signaling pathway	1	15	3	108	2.4	0.364	P47713	KEGG
Cluster4	Adherens junction	2	16	6	108	2.25	0.216	P39447 Q62417	KEGG
Cluster4	Alzheimer disease	1	16	8	108	0.84	0.736	Q61062	KEGG
Cluster4	Axon guidance	1	16	7	108	0.96	0.686	O08553	KEGG
Cluster4	Basal cell carcinoma	1	16	2	108	3.38	0.276	Q61062	KEGG
Cluster4	Breast cancer	1	16	6	108	1.12	0.627	Q61062	KEGG
Cluster4	Calcium signaling pathway	2	16	4	108	3.38	0.104	Q8BSY0 Q99J21	KEGG
Cluster4	Cardiac muscle contraction	1	16	2	108	3.38	0.276	Q8BSY0	KEGG
Cluster4	Cushing syndrome	1	16	4	108	1.69	0.479	Q61062	KEGG
Cluster4	Gap junction	1	16	5	108	1.35	0.559	P39447	KEGG
Cluster4	Gastric cancer	1	16	4	108	1.69	0.479	Q61062	KEGG
Cluster4	GnRH signaling pathway	1	16	7	108	0.96	0.686	Q61084	KEGG
Cluster4	Hepatocellular carcinoma	1	16	4	108	1.69	0.479	Q61062	KEGG
Cluster4	Hippo signaling pathway	1	16	5	108	1.35	0.559	Q61062	KEGG
Cluster4	Human papillomavirus infection	1	16	6	108	1.12	0.627	Q61062	KEGG
Cluster4	Human T-cell leukemia virus 1 infection	1	16	5	108	1.35	0.559	Q61084	KEGG
Cluster4	Insulin signaling pathway	1	16	7	108	0.96	0.686	Q62417	KEGG
Cluster4	Lysosome	1	16	1	108	6.75	0.148	Q99J21	KEGG
Cluster4	MAPK signaling pathway	1	16	9	108	0.75	0.778	Q61084	KEGG
Cluster4	Melanogenesis	1	16	3	108	2.25	0.385	Q61062	KEGG
Cluster4	MicroRNAs in cancer	1	16	8	108	0.84	0.736	Q8CCH7	KEGG
Cluster4	mRNA surveillance pathway	1	16	6	108	1.12	0.627	Q52KI8	KEGG
Cluster4	mTOR signaling pathway	2	16	5	108	2.7	0.158	Q61062 Q8BGD9	KEGG
Cluster4	Neurotrophin signaling pathway	1	16	6	108	1.12	0.627	Q61084	KEGG
Cluster4	Notch signaling pathway	1	16	2	108	3.38	0.276	Q61062	KEGG
Cluster4	Pathways in cancer	1	16	8	108	0.84	0.736	Q61062	KEGG
Cluster4	PI3K-Akt signaling pathway	1	16	6	108	1.12	0.627	Q8BGD9	KEGG
Cluster4	PPAR signaling pathway	1	16	1	108	6.75	0.148	Q62417	KEGG
Cluster4	Protein processing in endoplasmic reticulum	1	16	5	108	1.35	0.559	Q80UW2	KEGG
Cluster4	Proteoglycans in cancer	2	16	6	108	2.25	0.216	Q61656 Q8BGD9	KEGG
Cluster4	Ribosome biogenesis in eukaryotes	1	16	5	108	1.35	0.559	Q9CQS2	KEGG
Cluster4	RNA transport	3	16	8	108	2.53	0.0943	Q52KI8 Q6NZJ6 Q8BGD9	KEGG
Cluster4	Spliceosome	2	16	9	108	1.5	0.397	Q61656 Q923D5	KEGG
Cluster4	Tight junction	1	16	11	108	0.61	0.844	P39447	KEGG
Cluster4	Transcriptional misregulation in cancer	1	16	2	108	3.38	0.276	Q61656	KEGG
Cluster4	Ubiquitin mediated proteolysis	2	16	4	108	3.38	0.104	P52483 Q80UW2	KEGG
Cluster4	Viral myocarditis	1	16	1	108	6.75	0.148	Q6NZJ6	KEGG
Cluster4	Wnt signaling pathway	1	16	3	108	2.25	0.385	Q61062	KEGG
Cluster5	Adipocytokine signaling pathway	2	28	3	108	2.57	0.164	P81122 Q6PAM0	KEGG
Cluster5	Adrenergic signaling in cardiomyocytes	1	28	3	108	1.29	0.598	Q61165	KEGG
Cluster5	Alzheimer disease	1	28	8	108	0.48	0.918	P81122	KEGG
Cluster5	Amino sugar and nucleotide sugar metabolism	1	28	1	108	3.86	0.259	O70475	KEGG
Cluster5	Amphetamine addiction	1	28	1	108	3.86	0.259	P05627	KEGG
Cluster5	AMPK signaling pathway	3	28	4	108	2.89	0.0527	P81122 Q60949 Q6PAM0	KEGG
Cluster5	Amyotrophic lateral sclerosis (ALS)	1	28	6	108	0.64	0.843	Q3UYV9	KEGG
Cluster5	Antigen processing and presentation	1	28	1	108	3.86	0.259	Q9JL61	KEGG
Cluster5	Apelin signaling pathway	2	28	6	108	1.29	0.491	Q61165 Q6PAM0	KEGG
Cluster5	Apoptosis	2	28	4	108	1.93	0.276	O54918 P05627	KEGG
Cluster5	Apoptosis - multiple species	2	28	2	108	3.86	0.0654	O54918 O88738	KEGG
Cluster5	Ascorbate and aldarate metabolism	1	28	1	108	3.86	0.259	O70475	KEGG
Cluster5	Autophagy - animal	1	28	7	108	0.55	0.886	P81122	KEGG
Cluster5	B cell receptor signaling pathway	1	28	3	108	1.29	0.598	P05627	KEGG
Cluster5	Bile secretion	1	28	1	108	3.86	0.259	Q61165	KEGG
Cluster5	Breast cancer	1	28	6	108	0.64	0.843	P05627	KEGG
Cluster5	C-type lectin receptor signaling pathway	2	28	4	108	1.93	0.276	P05627 Q04863	KEGG
Cluster5	cAMP signaling pathway	2	28	5	108	1.54	0.387	P05627 Q61165	KEGG
Cluster5	Cardiac muscle contraction	1	28	2	108	1.93	0.453	Q61165	KEGG
Cluster5	Cellular senescence	1	28	3	108	1.29	0.598	Q8C735	KEGG
Cluster5	cGMP-PKG signaling pathway	1	28	3	108	1.29	0.598	P81122	KEGG
Cluster5	Chagas disease (American trypanosomiasis)	1	28	3	108	1.29	0.598	P05627	KEGG
Cluster5	Choline metabolism in cancer	1	28	4	108	0.96	0.705	P05627	KEGG
Cluster5	Circadian rhythm	1	28	2	108	1.93	0.453	Q6PAM0	KEGG
Cluster5	Cocaine addiction	1	28	1	108	3.86	0.259	P05627	KEGG
Cluster5	Colorectal cancer	2	28	5	108	1.54	0.387	O54918 P05627	KEGG
Cluster5	EGFR tyrosine kinase inhibitor resistance	1	28	4	108	0.96	0.705	O54918	KEGG
Cluster5	Endocrine resistance	1	28	4	108	0.96	0.705	P05627	KEGG
Cluster5	Endocytosis	2	28	5	108	1.54	0.387	P98078 Q9QWY8	KEGG
Cluster5	Epstein-Barr virus infection	3	28	3	108	3.86	0.016	O54918 P05627 Q04863	KEGG
Cluster5	ErbB signaling pathway	1	28	5	108	0.77	0.784	P05627	KEGG
Cluster5	Estrogen signaling pathway	1	28	4	108	0.96	0.705	P05627	KEGG
Cluster5	Fanconi anemia pathway	1	28	1	108	3.86	0.259	Q80V62	KEGG
Cluster5	Fc gamma R-mediated phagocytosis	1	28	6	108	0.64	0.843	Q9QWY8	KEGG
Cluster5	Fluid shear stress and atherosclerosis	2	28	3	108	2.57	0.164	P05627 Q9WVS8	KEGG
Cluster5	Focal adhesion	1	28	6	108	0.64	0.843	P05627	KEGG
Cluster5	FoxO signaling pathway	3	28	7	108	1.65	0.258	O54918 P81122 Q6PAM0	KEGG
Cluster5	Gap junction	1	28	5	108	0.77	0.784	Q9WVS8	KEGG
Cluster5	Gastric acid secretion	1	28	1	108	3.86	0.259	Q61165	KEGG
Cluster5	Glucagon signaling pathway	1	28	3	108	1.29	0.598	Q6PAM0	KEGG
Cluster5	GnRH signaling pathway	2	28	7	108	1.1	0.584	P05627 Q9WVS8	KEGG
Cluster5	Growth hormone synthesis, secretion and actionNew!	1	28	3	108	1.29	0.598	P81122	KEGG
Cluster5	Hepatitis B	1	28	3	108	1.29	0.598	P05627	KEGG
Cluster5	Herpes simplex virus 1 infection	1	28	3	108	1.29	0.598	Q61191	KEGG
Cluster5	Hippo signaling pathway	1	28	5	108	0.77	0.784	Q80U72	KEGG
Cluster5	Human immunodeficiency virus 1 infection	1	28	5	108	0.77	0.784	P05627	KEGG
Cluster5	Human papillomavirus infection	1	28	6	108	0.64	0.843	Q80U72	KEGG
Cluster5	Human T-cell leukemia virus 1 infection	2	28	5	108	1.54	0.387	P05627 Q04863	KEGG
Cluster5	Hypertrophic cardiomyopathy (HCM)	1	28	2	108	1.93	0.453	Q6PAM0	KEGG
Cluster5	IL-17 signaling pathway	2	28	5	108	1.54	0.387	P05627 Q9WVS8	KEGG
Cluster5	Inflammatory bowel disease (IBD)	1	28	1	108	3.86	0.259	P05627	KEGG
Cluster5	Insulin resistance	2	28	4	108	1.93	0.276	P81122 Q6PAM0	KEGG
Cluster5	Insulin signaling pathway	2	28	7	108	1.1	0.584	P81122 Q6PAM0	KEGG
Cluster5	Kaposi sarcoma-associated herpesvirus infection	1	28	4	108	0.96	0.705	P05627	KEGG
Cluster5	Leishmaniasis	1	28	3	108	1.29	0.598	P05627	KEGG
Cluster5	Longevity regulating pathway	2	28	4	108	1.93	0.276	P81122 Q6PAM0	KEGG
Cluster5	Longevity regulating pathway - multiple species	2	28	3	108	2.57	0.164	P81122 Q6PAM0	KEGG
Cluster5	MAPK signaling pathway	3	28	9	108	1.29	0.426	P05627 Q04863 Q9WVS8	KEGG
Cluster5	Measles	1	28	1	108	3.86	0.259	P05627	KEGG
Cluster5	MicroRNAs in cancer	3	28	8	108	1.45	0.342	O54918 P81122 Q9WVS8	KEGG
Cluster5	Mitophagy - animal	1	28	3	108	1.29	0.598	P05627	KEGG
Cluster5	mRNA surveillance pathway	3	28	6	108	1.93	0.179	O35691 Q3UYV9 Q6PCL9	KEGG
Cluster5	Neurotrophin signaling pathway	3	28	6	108	1.93	0.179	P05627 Q8C180 Q9WVS8	KEGG
Cluster5	NF-kappa B signaling pathway	1	28	1	108	3.86	0.259	Q04863	KEGG
Cluster5	NOD-like receptor signaling pathway	2	28	7	108	1.1	0.584	P05627 P70399	KEGG
Cluster5	Non-alcoholic fatty liver disease (NAFLD)	4	28	5	108	3.09	0.0156	O54918 P05627 P81122 Q6PAM0	KEGG
Cluster5	Nucleotide excision repair	1	28	2	108	1.93	0.453	P54726	KEGG
Cluster5	Osteoclast differentiation	2	28	4	108	1.93	0.276	P05627 Q04863	KEGG
Cluster5	Oxytocin signaling pathway	3	28	7	108	1.65	0.258	P05627 Q6PAM0 Q9WVS8	KEGG
Cluster5	Pancreatic secretion	1	28	1	108	3.86	0.259	Q61165	KEGG
Cluster5	Pathways in cancer	2	28	8	108	0.96	0.665	O54918 P05627	KEGG
Cluster5	Pentose and glucuronate interconversions	1	28	1	108	3.86	0.259	O70475	KEGG
Cluster5	Pertussis	1	28	4	108	0.96	0.705	P05627	KEGG
Cluster5	PI3K-Akt signaling pathway	1	28	6	108	0.64	0.843	O54918	KEGG
Cluster5	Primary immunodeficiency	1	28	1	108	3.86	0.259	Q9JL61	KEGG
Cluster5	Protein processing in endoplasmic reticulum	1	28	5	108	0.77	0.784	P54726	KEGG
Cluster5	Proteoglycans in cancer	2	28	6	108	1.29	0.491	Q61165 Q8C180	KEGG
Cluster5	Regulation of actin cytoskeleton	1	28	9	108	0.43	0.941	Q61165	KEGG
Cluster5	Regulation of lipolysis in adipocytes	1	28	1	108	3.86	0.259	P81122	KEGG
Cluster5	Relaxin signaling pathway	1	28	3	108	1.29	0.598	P05627	KEGG
Cluster5	Renal cell carcinoma	1	28	4	108	0.96	0.705	P05627	KEGG
Cluster5	Rheumatoid arthritis	1	28	1	108	3.86	0.259	P05627	KEGG
Cluster5	Ribosome biogenesis in eukaryotes	1	28	5	108	0.77	0.784	O88796	KEGG
Cluster5	RNA transport	3	28	8	108	1.45	0.342	O35691 O88796 Q3UYV9	KEGG
Cluster5	Salivary secretion	1	28	1	108	3.86	0.259	Q61165	KEGG
Cluster5	Salmonella infection	1	28	5	108	0.77	0.784	P05627	KEGG
Cluster5	Spliceosome	2	28	9	108	0.86	0.733	Q3UYV9 Q6PFR5	KEGG
Cluster5	T cell receptor signaling pathway	1	28	5	108	0.77	0.784	P05627	KEGG
Cluster5	Th1 and Th2 cell differentiation	1	28	3	108	1.29	0.598	P05627	KEGG
Cluster5	Th17 cell differentiation	1	28	3	108	1.29	0.598	P05627	KEGG
Cluster5	Thermogenesis	2	28	4	108	1.93	0.276	Q6PAM0 Q8C180	KEGG
Cluster5	Thyroid hormone signaling pathway	1	28	6	108	0.64	0.843	Q61165	KEGG
Cluster5	Tight junction	5	28	11	108	1.75	0.118	P05627 Q3TN34 Q6AW69 Q6PAM0 Q80U72	KEGG
Cluster5	TNF signaling pathway	1	28	4	108	0.96	0.705	P05627	KEGG
Cluster5	Toll-like receptor signaling pathway	1	28	3	108	1.29	0.598	P05627	KEGG
Cluster5	Transcriptional misregulation in cancer	1	28	2	108	1.93	0.453	Q8VBT9	KEGG
Cluster5	Tuberculosis	1	28	3	108	1.29	0.598	Q9JL61	KEGG
Cluster5	Type II diabetes mellitus	1	28	3	108	1.29	0.598	P81122	KEGG
Cluster5	Ubiquitin mediated proteolysis	1	28	4	108	0.96	0.705	O88738	KEGG
Cluster5	Viral carcinogenesis	2	28	4	108	1.93	0.276	P05627 Q80U72	KEGG
Cluster5	Wnt signaling pathway	1	28	3	108	1.29	0.598	P05627	KEGG
Cluster5	Yersinia infection	1	28	5	108	0.77	0.784	P05627	KEGG
Cluster6	Acute myeloid leukemia	2	21	2	108	5.14	0.0363	P63085 Q63844	KEGG
Cluster6	Adherens junction	3	21	6	108	2.57	0.0863	P63085 Q63844 Q99NH2	KEGG
Cluster6	Adipocytokine signaling pathway	1	21	3	108	1.71	0.481	Q9R078	KEGG
Cluster6	Adrenergic signaling in cardiomyocytes	2	21	3	108	3.43	0.096	P63085 Q63844	KEGG
Cluster6	Alcoholism	2	21	2	108	5.14	0.0363	P63085 Q63844	KEGG
Cluster6	Aldosterone-regulated sodium reabsorption	2	21	2	108	5.14	0.0363	P63085 Q63844	KEGG
Cluster6	Alzheimer disease	3	21	8	108	1.93	0.184	P63085 Q63844 Q9ESK9	KEGG
Cluster6	AMPK signaling pathway	1	21	4	108	1.29	0.585	Q9R078	KEGG
Cluster6	Amyotrophic lateral sclerosis (ALS)	2	21	6	108	1.71	0.331	Q9ERU9 Q9ESK9	KEGG
Cluster6	Apelin signaling pathway	3	21	6	108	2.57	0.0863	P63085 Q63844 Q9R078	KEGG
Cluster6	Apoptosis	2	21	4	108	2.57	0.169	P63085 Q63844	KEGG
Cluster6	Autophagy - animal	3	21	7	108	2.2	0.132	P63085 Q63844 Q9ESK9	KEGG
Cluster6	Axon guidance	4	21	7	108	2.94	0.0257	P63085 Q63844 Q99M51 Q99NH2	KEGG
Cluster6	B cell receptor signaling pathway	2	21	3	108	3.43	0.096	P63085 Q63844	KEGG
Cluster6	Bladder cancer	2	21	3	108	3.43	0.096	P63085 Q63844	KEGG
Cluster6	Breast cancer	2	21	6	108	1.71	0.331	P63085 Q63844	KEGG
Cluster6	C-type lectin receptor signaling pathway	2	21	4	108	2.57	0.169	P63085 Q63844	KEGG
Cluster6	cAMP signaling pathway	2	21	5	108	2.06	0.249	P63085 Q63844	KEGG
Cluster6	Cellular senescence	2	21	3	108	3.43	0.096	P63085 Q63844	KEGG
Cluster6	Central carbon metabolism in cancer	2	21	3	108	3.43	0.096	P63085 Q63844	KEGG
Cluster6	cGMP-PKG signaling pathway	2	21	3	108	3.43	0.096	P63085 Q63844	KEGG
Cluster6	Chagas disease (American trypanosomiasis)	2	21	3	108	3.43	0.096	P63085 Q63844	KEGG
Cluster6	Chemokine signaling pathway	3	21	3	108	5.14	0.00651	P63085 Q63844 Q99NH2	KEGG
Cluster6	Choline metabolism in cancer	2	21	4	108	2.57	0.169	P63085 Q63844	KEGG
Cluster6	Cholinergic synapse	2	21	2	108	5.14	0.0363	P63085 Q63844	KEGG
Cluster6	Chronic myeloid leukemia	2	21	2	108	5.14	0.0363	P63085 Q63844	KEGG
Cluster6	Circadian entrainment	2	21	2	108	5.14	0.0363	P63085 Q63844	KEGG
Cluster6	Circadian rhythm	1	21	2	108	2.57	0.353	Q9R078	KEGG
Cluster6	Colorectal cancer	2	21	5	108	2.06	0.249	P63085 Q63844	KEGG
Cluster6	Cushing syndrome	2	21	4	108	2.57	0.169	P63085 Q63844	KEGG
Cluster6	DNA replication	2	21	3	108	3.43	0.096	P33611 Q9WUK4	KEGG
Cluster6	EGFR tyrosine kinase inhibitor resistance	2	21	4	108	2.57	0.169	P63085 Q63844	KEGG
Cluster6	Endocrine resistance	2	21	4	108	2.57	0.169	P63085 Q63844	KEGG
Cluster6	Endocytosis	2	21	5	108	2.06	0.249	G3XA57 Q99NH2	KEGG
Cluster6	Endometrial cancer	2	21	3	108	3.43	0.096	P63085 Q63844	KEGG
Cluster6	ErbB signaling pathway	3	21	5	108	3.09	0.0495	P63085 Q63844 Q99M51	KEGG
Cluster6	Estrogen signaling pathway	2	21	4	108	2.57	0.169	P63085 Q63844	KEGG
Cluster6	Fc epsilon RI signaling pathway	2	21	3	108	3.43	0.096	P63085 Q63844	KEGG
Cluster6	Fc gamma R-mediated phagocytosis	2	21	6	108	1.71	0.331	P63085 Q63844	KEGG
Cluster6	Focal adhesion	2	21	6	108	1.71	0.331	P63085 Q63844	KEGG
Cluster6	FoxO signaling pathway	3	21	7	108	2.2	0.132	P63085 Q63844 Q9R078	KEGG
Cluster6	Gap junction	2	21	5	108	2.06	0.249	P63085 Q63844	KEGG
Cluster6	Gastric cancer	2	21	4	108	2.57	0.169	P63085 Q63844	KEGG
Cluster6	Glioma	2	21	2	108	5.14	0.0363	P63085 Q63844	KEGG
Cluster6	Glucagon signaling pathway	1	21	3	108	1.71	0.481	Q9R078	KEGG
Cluster6	Glutamatergic synapse	2	21	3	108	3.43	0.096	P63085 Q63844	KEGG
Cluster6	GnRH secretion	2	21	2	108	5.14	0.0363	P63085 Q63844	KEGG
Cluster6	GnRH signaling pathway	2	21	7	108	1.47	0.41	P63085 Q63844	KEGG
Cluster6	Growth hormone synthesis, secretion and actionNew!	2	21	3	108	3.43	0.096	P63085 Q63844	KEGG
Cluster6	Hepatitis B	2	21	3	108	3.43	0.096	P63085 Q63844	KEGG
Cluster6	Hepatitis C	2	21	2	108	5.14	0.0363	P63085 Q63844	KEGG
Cluster6	Hepatocellular carcinoma	2	21	4	108	2.57	0.169	P63085 Q63844	KEGG
Cluster6	HIF-1 signaling pathway	2	21	2	108	5.14	0.0363	P63085 Q63844	KEGG
Cluster6	Hippo signaling pathway	1	21	5	108	1.03	0.669	Q99NH2	KEGG
Cluster6	Human cytomegalovirus infection	2	21	2	108	5.14	0.0363	P63085 Q63844	KEGG
Cluster6	Human immunodeficiency virus 1 infection	2	21	5	108	2.06	0.249	P63085 Q63844	KEGG
Cluster6	Human papillomavirus infection	3	21	6	108	2.57	0.0863	P63085 Q63844 Q99NH2	KEGG
Cluster6	Human T-cell leukemia virus 1 infection	2	21	5	108	2.06	0.249	P63085 Q63844	KEGG
Cluster6	Huntington disease	1	21	2	108	2.57	0.353	Q9ESK9	KEGG
Cluster6	Hypertrophic cardiomyopathy (HCM)	1	21	2	108	2.57	0.353	Q9R078	KEGG
Cluster6	IL-17 signaling pathway	2	21	5	108	2.06	0.249	P63085 Q63844	KEGG
Cluster6	Influenza A	2	21	2	108	5.14	0.0363	P63085 Q63844	KEGG
Cluster6	Insulin resistance	1	21	4	108	1.29	0.585	Q9R078	KEGG
Cluster6	Insulin signaling pathway	3	21	7	108	2.2	0.132	P63085 Q63844 Q9R078	KEGG
Cluster6	Kaposi sarcoma-associated herpesvirus infection	2	21	4	108	2.57	0.169	P63085 Q63844	KEGG
Cluster6	Leishmaniasis	2	21	3	108	3.43	0.096	P63085 Q63844	KEGG
Cluster6	Long-term depression	2	21	3	108	3.43	0.096	P63085 Q63844	KEGG
Cluster6	Long-term potentiation	2	21	2	108	5.14	0.0363	P63085 Q63844	KEGG
Cluster6	Longevity regulating pathway	2	21	4	108	2.57	0.169	Q9ESK9 Q9R078	KEGG
Cluster6	Longevity regulating pathway - multiple species	1	21	3	108	1.71	0.481	Q9R078	KEGG
Cluster6	MAPK signaling pathway	2	21	9	108	1.14	0.555	P63085 Q63844	KEGG
Cluster6	Melanogenesis	2	21	3	108	3.43	0.096	P63085 Q63844	KEGG
Cluster6	Melanoma	2	21	2	108	5.14	0.0363	P63085 Q63844	KEGG
Cluster6	MicroRNAs in cancer	2	21	8	108	1.29	0.485	P63085 Q63844	KEGG
Cluster6	Mismatch repair	1	21	1	108	5.14	0.194	Q9WUK4	KEGG
Cluster6	Mitophagy - animal	1	21	3	108	1.71	0.481	Q9R210	KEGG
Cluster6	mRNA surveillance pathway	1	21	6	108	0.86	0.736	Q9D0L8	KEGG
Cluster6	mTOR signaling pathway	2	21	5	108	2.06	0.249	P63085 Q63844	KEGG
Cluster6	Natural killer cell mediated cytotoxicity	2	21	2	108	5.14	0.0363	P63085 Q63844	KEGG
Cluster6	Neuroactive ligand-receptor interaction	1	21	1	108	5.14	0.194	Q99NH2	KEGG
Cluster6	Neurotrophin signaling pathway	2	21	6	108	1.71	0.331	P63085 Q63844	KEGG
Cluster6	NOD-like receptor signaling pathway	3	21	7	108	2.2	0.132	P63085 Q63844 Q8BWW9	KEGG
Cluster6	Non-alcoholic fatty liver disease (NAFLD)	1	21	5	108	1.03	0.669	Q9R078	KEGG
Cluster6	Non-small cell lung cancer	2	21	2	108	5.14	0.0363	P63085 Q63844	KEGG
Cluster6	Nucleotide excision repair	1	21	2	108	2.57	0.353	Q9WUK4	KEGG
Cluster6	Oocyte meiosis	2	21	2	108	5.14	0.0363	P63085 Q63844	KEGG
Cluster6	Osteoclast differentiation	2	21	4	108	2.57	0.169	P63085 Q63844	KEGG
Cluster6	Oxytocin signaling pathway	3	21	7	108	2.2	0.132	P63085 Q63844 Q9R078	KEGG
Cluster6	Pancreatic cancer	2	21	2	108	5.14	0.0363	P63085 Q63844	KEGG
Cluster6	Pathways in cancer	2	21	8	108	1.29	0.485	P63085 Q63844	KEGG
Cluster6	Pertussis	2	21	4	108	2.57	0.169	P63085 Q63844	KEGG
Cluster6	Phospholipase D signaling pathway	2	21	3	108	3.43	0.096	P63085 Q63844	KEGG
Cluster6	PI3K-Akt signaling pathway	3	21	6	108	2.57	0.0863	P63085 Q63844 Q8BWW9	KEGG
Cluster6	Platelet activation	2	21	4	108	2.57	0.169	P63085 Q63844	KEGG
Cluster6	Platinum drug resistance	2	21	2	108	5.14	0.0363	P63085 Q63844	KEGG
Cluster6	Prion diseases	2	21	3	108	3.43	0.096	P63085 Q63844	KEGG
Cluster6	Progesterone-mediated oocyte maturation	3	21	3	108	5.14	0.00651	O55098 P63085 Q63844	KEGG
Cluster6	Prolactin signaling pathway	2	21	2	108	5.14	0.0363	P63085 Q63844	KEGG
Cluster6	Prostate cancer	2	21	2	108	5.14	0.0363	P63085 Q63844	KEGG
Cluster6	Proteoglycans in cancer	2	21	6	108	1.71	0.331	P63085 Q63844	KEGG
Cluster6	Rap1 signaling pathway	3	21	5	108	3.09	0.0495	P63085 Q63844 Q99NH2	KEGG
Cluster6	Ras signaling pathway	2	21	6	108	1.71	0.331	P63085 Q63844	KEGG
Cluster6	Regulation of actin cytoskeleton	3	21	9	108	1.71	0.241	O88842 P63085 Q63844	KEGG
Cluster6	Relaxin signaling pathway	2	21	3	108	3.43	0.096	P63085 Q63844	KEGG
Cluster6	Renal cell carcinoma	2	21	4	108	2.57	0.169	P63085 Q63844	KEGG
Cluster6	Retrograde endocannabinoid signaling	2	21	2	108	5.14	0.0363	P63085 Q63844	KEGG
Cluster6	Ribosome biogenesis in eukaryotes	1	21	5	108	1.03	0.669	Q9D6Z1	KEGG
Cluster6	RNA transport	3	21	8	108	1.93	0.184	Q05D44 Q6NZJ6 Q9ERU9	KEGG
Cluster6	Salmonella infection	3	21	5	108	3.09	0.0495	P63085 Q63844 Q6P9Q4	KEGG
Cluster6	Serotonergic synapse	2	21	3	108	3.43	0.096	P63085 Q63844	KEGG
Cluster6	Sphingolipid signaling pathway	2	21	2	108	5.14	0.0363	P63085 Q63844	KEGG
Cluster6	Spinocerebellar ataxiaNew!	3	21	4	108	3.86	0.0227	Q924A2 Q9D6Z1 Q9ESK9	KEGG
Cluster6	T cell receptor signaling pathway	3	21	5	108	3.09	0.0495	P63085 Q63844 Q99M51	KEGG
Cluster6	TGF-beta signaling pathway	2	21	2	108	5.14	0.0363	P63085 Q63844	KEGG
Cluster6	Th1 and Th2 cell differentiation	2	21	3	108	3.43	0.096	P63085 Q63844	KEGG
Cluster6	Th17 cell differentiation	2	21	3	108	3.43	0.096	P63085 Q63844	KEGG
Cluster6	Thermogenesis	2	21	4	108	2.57	0.169	Q6ZPY7 Q9R078	KEGG
Cluster6	Thyroid cancer	2	21	2	108	5.14	0.0363	P63085 Q63844	KEGG
Cluster6	Thyroid hormone signaling pathway	2	21	6	108	1.71	0.331	P63085 Q63844	KEGG
Cluster6	Tight junction	2	21	11	108	0.94	0.675	Q99NH2 Q9R078	KEGG
Cluster6	TNF signaling pathway	2	21	4	108	2.57	0.169	P63085 Q63844	KEGG
Cluster6	Toll-like receptor signaling pathway	2	21	3	108	3.43	0.096	P63085 Q63844	KEGG
Cluster6	Toxoplasmosis	2	21	2	108	5.14	0.0363	P63085 Q63844	KEGG
Cluster6	Tuberculosis	2	21	3	108	3.43	0.096	P63085 Q63844	KEGG
Cluster6	Type II diabetes mellitus	2	21	3	108	3.43	0.096	P63085 Q63844	KEGG
Cluster6	Vascular smooth muscle contraction	2	21	3	108	3.43	0.096	P63085 Q63844	KEGG
Cluster6	VEGF signaling pathway	2	21	3	108	3.43	0.096	P63085 Q63844	KEGG
Cluster6	Viral carcinogenesis	2	21	4	108	2.57	0.169	P63085 Q63844	KEGG
Cluster6	Viral myocarditis	1	21	1	108	5.14	0.194	Q6NZJ6	KEGG
Cluster6	Yersinia infection	3	21	5	108	3.09	0.0495	P63085 Q63844 Q8BWW9	KEGG

## Sheet: GO.BP
Table SIII. GO biological process enrichment analysis by cluster.
Cluster	Terms	Mapping	All.mapping	Background	All.background	Fold.enrich	P-value	Protein.IDs	Type
Cluster1	4-hydroxyproline metabolic process	1	36	1	254	7.06	0.142	P09103	GO_BP
Cluster1	actin cytoskeleton organization	2	36	13	254	1.09	0.574	Q8BKG3 Q8BTW9	GO_BP
Cluster1	actin cytoskeleton reorganization	1	36	2	254	3.53	0.264	Q8BKG3	GO_BP
Cluster1	actin filament-based process	2	36	18	254	0.78	0.757	Q8BKG3 Q8BTW9	GO_BP
Cluster1	activation of JUN kinase activity	2	36	3	254	4.7	0.0535	O35625 Q61083	GO_BP
Cluster1	activation of MAPK activity	3	36	8	254	2.65	0.0886	O35625 Q61083 Q99MN1	GO_BP
Cluster1	activation of MAPKK activity	1	36	3	254	2.35	0.369	Q61083	GO_BP
Cluster1	activation of protein kinase activity	4	36	11	254	2.57	0.0541	O35625 Q61083 Q8BTW9 Q99MN1	GO_BP
Cluster1	alpha-amino acid metabolic process	1	36	2	254	3.53	0.264	P09103	GO_BP
Cluster1	amide biosynthetic process	4	36	8	254	3.53	0.0158	P62751 Q99MN1 Q99PL5 Q9CR57	GO_BP
Cluster1	amide transport	4	36	24	254	1.18	0.452	P33611 P62751 Q52KI8 Q8R0F5	GO_BP
Cluster1	amino acid activation	1	36	1	254	7.06	0.142	Q99MN1	GO_BP
Cluster1	anatomical structure development	14	36	92	254	1.07	0.427	E9Q5F9 O08784 O35625 Q0VBL3 Q62433 Q6P1G2 Q8BKG3 Q8K0F1 Q8K1M6 Q8K2T8 Q8K4E0 Q924A2 Q9R0L6 Q9Z0U1	GO_BP
Cluster1	anatomical structure homeostasis	1	36	7	254	1.01	0.662	P33611	GO_BP
Cluster1	anatomical structure morphogenesis	9	36	52	254	1.22	0.299	E9Q5F9 O08784 O35625 Q0VBL3 Q6P1G2 Q8BKG3 Q8K1M6 Q8K2T8 Q8K4E0	GO_BP
Cluster1	angiogenesis	2	36	3	254	4.7	0.0535	E9Q5F9 Q0VBL3	GO_BP
Cluster1	animal organ development	10	36	59	254	1.2	0.307	E9Q5F9 O08784 O35625 Q0VBL3 Q6P1G2 Q8BKG3 Q8K0F1 Q8K4E0 Q924A2 Q9R0L6	GO_BP
Cluster1	animal organ morphogenesis	6	36	23	254	1.84	0.0862	E9Q5F9 O35625 Q0VBL3 Q6P1G2 Q8BKG3 Q8K4E0	GO_BP
Cluster1	anterior/posterior pattern specification	2	36	3	254	4.7	0.0535	O35625 Q6P1G2	GO_BP
Cluster1	antigen processing and presentation	1	36	3	254	2.35	0.369	Q8R1Q8	GO_BP
Cluster1	apoptotic mitochondrial changes	1	36	4	254	1.76	0.46	Q8K1M6	GO_BP
Cluster1	apoptotic process	2	36	16	254	0.88	0.693	Q8BTW9 Q8K1M6	GO_BP
Cluster1	apoptotic signaling pathway	1	36	7	254	1.01	0.662	Q8K1M6	GO_BP
Cluster1	aromatic compound biosynthetic process	7	36	36	254	1.37	0.229	E9Q5F9 O08784 P33611 P57776 Q8K2T8 Q99MN1 Q9Z0U1	GO_BP
Cluster1	aromatic compound catabolic process	1	36	6	254	1.18	0.604	P62751	GO_BP
Cluster1	axial mesoderm development	1	36	1	254	7.06	0.142	O35625	GO_BP
Cluster1	axial mesoderm formation	1	36	1	254	7.06	0.142	O35625	GO_BP
Cluster1	axial mesoderm morphogenesis	1	36	1	254	7.06	0.142	O35625	GO_BP
Cluster1	axis elongation	1	36	1	254	7.06	0.142	Q8BKG3	GO_BP
Cluster1	axis specification	1	36	2	254	3.53	0.264	O35625	GO_BP
Cluster1	axon ensheathment	1	36	4	254	1.76	0.46	Q62433	GO_BP
Cluster1	basophil activation	1	36	1	254	7.06	0.142	Q99MN1	GO_BP
Cluster1	basophil activation involved in immune response	1	36	1	254	7.06	0.142	Q99MN1	GO_BP
Cluster1	behavior	2	36	7	254	2.02	0.26	Q924A2 Q9R0L6	GO_BP
Cluster1	beta-catenin destruction complex assembly	1	36	1	254	7.06	0.142	O35625	GO_BP
Cluster1	beta-catenin destruction complex disassembly	1	36	2	254	3.53	0.264	O35625	GO_BP
Cluster1	biological regulation	27	36	203	254	0.94	0.846	E9Q5F9 O08784 O35625 P09103 P09528 P33611 P57776 P62751 Q0VBL3 Q61083 Q62433 Q6P1G2 Q6P5F6 Q8BKG3 Q8BKI2 Q8BTW9 Q8K0F1 Q8K1M6 Q8K2T8 Q8K4E0 Q8R1Q8 Q924A2 Q99MN1 Q99PL5 Q9R0L6 Q9R1C7 Q9Z0U1	GO_BP
Cluster1	biosynthetic process	11	36	50	254	1.55	0.0655	E9Q5F9 O08784 P33611 P49717 P57776 P62751 Q8K2T8 Q99MN1 Q99PL5 Q9CR57 Q9Z0U1	GO_BP
Cluster1	blood vessel development	3	36	11	254	1.92	0.193	E9Q5F9 Q0VBL3 Q8BKG3	GO_BP
Cluster1	blood vessel morphogenesis	2	36	6	254	2.35	0.203	E9Q5F9 Q0VBL3	GO_BP
Cluster1	brain development	6	36	22	254	1.92	0.0711	E9Q5F9 O35625 Q6P1G2 Q8K0F1 Q924A2 Q9R0L6	GO_BP
Cluster1	branching involved in blood vessel morphogenesis	1	36	1	254	7.06	0.142	Q0VBL3	GO_BP
Cluster1	branching morphogenesis of an epithelial tube	1	36	3	254	2.35	0.369	Q0VBL3	GO_BP
Cluster1	calcium-mediated signaling	1	36	4	254	1.76	0.46	Q8K4E0	GO_BP
Cluster1	camera-type eye development	1	36	6	254	1.18	0.604	Q6P1G2	GO_BP
Cluster1	camera-type eye morphogenesis	1	36	4	254	1.76	0.46	Q6P1G2	GO_BP
Cluster1	canonical Wnt signaling pathway	2	36	4	254	3.53	0.0975	O35625 Q8BKG3	GO_BP
Cluster1	carbohydrate derivative metabolic process	1	36	7	254	1.01	0.662	Q9Z0U1	GO_BP
Cluster1	carbohydrate homeostasis	1	36	5	254	1.41	0.537	Q8K4E0	GO_BP
Cluster1	carbohydrate metabolic process	1	36	4	254	1.76	0.46	Q8BWJ3	GO_BP
Cluster1	carboxylic acid metabolic process	2	36	9	254	1.57	0.373	P09103 Q99MN1	GO_BP
Cluster1	cardiac chamber development	2	36	8	254	1.76	0.317	Q0VBL3 Q8BKG3	GO_BP
Cluster1	cardiac chamber morphogenesis	1	36	4	254	1.76	0.46	Q0VBL3	GO_BP
Cluster1	cardiac septum development	2	36	7	254	2.02	0.26	Q0VBL3 Q8BKG3	GO_BP
Cluster1	cardiac septum morphogenesis	1	36	3	254	2.35	0.369	Q0VBL3	GO_BP
Cluster1	cardiac ventricle development	2	36	6	254	2.35	0.203	Q0VBL3 Q8BKG3	GO_BP
Cluster1	cardiovascular system development	3	36	11	254	1.92	0.193	E9Q5F9 Q0VBL3 Q8BKG3	GO_BP
Cluster1	catabolic process	2	36	21	254	0.67	0.832	O35625 P62751	GO_BP
Cluster1	cation homeostasis	2	36	9	254	1.57	0.373	P09528 Q6P5F6	GO_BP
Cluster1	cation transmembrane transport	1	36	6	254	1.18	0.604	Q6P5F6	GO_BP
Cluster1	cation transport	2	36	8	254	1.76	0.317	P09528 Q6P5F6	GO_BP
Cluster1	cell activation	3	36	17	254	1.25	0.443	Q62433 Q8R1Q8 Q99MN1	GO_BP
Cluster1	cell activation involved in immune response	2	36	7	254	2.02	0.26	Q8R1Q8 Q99MN1	GO_BP
Cluster1	cell communication	13	36	82	254	1.12	0.362	O35625 P09103 Q0VBL3 Q61083 Q62433 Q8BKG3 Q8BKI2 Q8BTW9 Q8K1M6 Q8K4E0 Q99MN1 Q99PL5 Q9Z0U1	GO_BP
Cluster1	cell cycle	6	36	24	254	1.76	0.103	E9Q5F9 P33611 P49717 Q8K4E0 Q8R1Q8 Q9R0L6	GO_BP
Cluster1	cell cycle DNA replication	1	36	2	254	3.53	0.264	P33611	GO_BP
Cluster1	cell cycle G1/S phase transition	2	36	4	254	3.53	0.0975	P33611 P49717	GO_BP
Cluster1	cell cycle G2/M phase transition	2	36	4	254	3.53	0.0975	Q8K4E0 Q9R0L6	GO_BP
Cluster1	cell cycle phase transition	4	36	8	254	3.53	0.0158	P33611 P49717 Q8K4E0 Q9R0L6	GO_BP
Cluster1	cell cycle process	6	36	22	254	1.92	0.0711	E9Q5F9 P33611 P49717 Q8K4E0 Q8R1Q8 Q9R0L6	GO_BP
Cluster1	cell death	2	36	18	254	0.78	0.757	Q8BTW9 Q8K1M6	GO_BP
Cluster1	cell development	7	36	32	254	1.54	0.144	E9Q5F9 O08784 O35625 Q62433 Q8K0F1 Q8K4E0 Q9Z0U1	GO_BP
Cluster1	cell differentiation	11	36	68	254	1.14	0.356	E9Q5F9 O08784 O35625 Q62433 Q7TSC1 Q8BKG3 Q8K0F1 Q8K2T8 Q8K4E0 Q9R0L6 Q9Z0U1	GO_BP
Cluster1	cell fate commitment	2	36	7	254	2.02	0.26	O35625 Q8K2T8	GO_BP
Cluster1	cell migration	5	36	19	254	1.86	0.112	E9Q5F9 Q8BKG3 Q8BTW9 Q9R0L6 Q9R1C7	GO_BP
Cluster1	cell migration involved in vasculogenesis	1	36	1	254	7.06	0.142	E9Q5F9	GO_BP
Cluster1	cell motility	5	36	19	254	1.86	0.112	E9Q5F9 Q8BKG3 Q8BTW9 Q9R0L6 Q9R1C7	GO_BP
Cluster1	cell part morphogenesis	1	36	14	254	0.5	0.889	Q8K1M6	GO_BP
Cluster1	cell population proliferation	4	36	20	254	1.41	0.309	P62751 Q8BTW9 Q8K4E0 Q9R0L6	GO_BP
Cluster1	cell projection assembly	2	36	8	254	1.76	0.317	Q8K4E0 Q9R0L6	GO_BP
Cluster1	cell projection organization	3	36	28	254	0.76	0.796	Q8K0F1 Q8K4E0 Q9R0L6	GO_BP
Cluster1	cell proliferation in forebrain	1	36	3	254	2.35	0.369	Q9R0L6	GO_BP
Cluster1	cell surface receptor signaling pathway	7	36	37	254	1.33	0.253	O35625 P09103 Q0VBL3 Q8BKG3 Q8BKI2 Q99MN1 Q9Z0U1	GO_BP
Cluster1	cell-cell signaling	3	36	14	254	1.51	0.317	O35625 Q8BKG3 Q8BKI2	GO_BP
Cluster1	cell-cell signaling by wnt	3	36	6	254	3.53	0.0388	O35625 Q8BKG3 Q8BKI2	GO_BP
Cluster1	cellular amide metabolic process	4	36	8	254	3.53	0.0158	P62751 Q99MN1 Q99PL5 Q9CR57	GO_BP
Cluster1	cellular amino acid metabolic process	2	36	3	254	4.7	0.0535	P09103 Q99MN1	GO_BP
Cluster1	cellular aromatic compound metabolic process	17	36	76	254	1.58	0.0141	A2AR02 E9Q5F9 O08784 O35625 P33611 P49717 P57776 P62751 Q0VBL3 Q52KI8 Q6NV83 Q8K2T8 Q8R0F5 Q99MN1 Q9CR57 Q9R1C7 Q9Z0U1	GO_BP
Cluster1	cellular biosynthetic process	11	36	50	254	1.55	0.0655	E9Q5F9 O08784 P33611 P49717 P57776 P62751 Q8K2T8 Q99MN1 Q99PL5 Q9CR57 Q9Z0U1	GO_BP
Cluster1	cellular catabolic process	1	36	20	254	0.35	0.959	P62751	GO_BP
Cluster1	cellular cation homeostasis	2	36	9	254	1.57	0.373	P09528 Q6P5F6	GO_BP
Cluster1	cellular chemical homeostasis	3	36	11	254	1.92	0.193	P09528 Q6P5F6 Q8K4E0	GO_BP
Cluster1	cellular component assembly	8	36	49	254	1.15	0.388	O35625 P09103 P62751 Q8K1M6 Q8K2T8 Q8K4E0 Q8R1Q8 Q9R0L6	GO_BP
Cluster1	cellular component biogenesis	9	36	55	254	1.15	0.369	O35625 P09103 P62751 Q8K1M6 Q8K2T8 Q8K4E0 Q8R1Q8 Q9CR57 Q9R0L6	GO_BP
Cluster1	cellular component disassembly	1	36	8	254	0.88	0.711	O35625	GO_BP
Cluster1	cellular component morphogenesis	1	36	21	254	0.34	0.965	Q8K1M6	GO_BP
Cluster1	cellular component organization	17	36	112	254	1.07	0.409	E9Q5F9 O35625 P09103 P33611 P49717 P62751 Q62433 Q6P1G2 Q8BKG3 Q8BTW9 Q8K0F1 Q8K1M6 Q8K2T8 Q8K4E0 Q8R1Q8 Q9R0L6 Q9R1C7	GO_BP
Cluster1	cellular component organization or biogenesis	18	36	115	254	1.1	0.331	E9Q5F9 O35625 P09103 P33611 P49717 P62751 Q62433 Q6P1G2 Q8BKG3 Q8BTW9 Q8K0F1 Q8K1M6 Q8K2T8 Q8K4E0 Q8R1Q8 Q9CR57 Q9R0L6 Q9R1C7	GO_BP
Cluster1	cellular developmental process	12	36	73	254	1.16	0.318	E9Q5F9 O08784 O35625 Q62433 Q7TSC1 Q8BKG3 Q8K0F1 Q8K1M6 Q8K2T8 Q8K4E0 Q9R0L6 Q9Z0U1	GO_BP
Cluster1	cellular divalent inorganic cation homeostasis	1	36	5	254	1.41	0.537	Q6P5F6	GO_BP
Cluster1	cellular glucose homeostasis	1	36	2	254	3.53	0.264	Q8K4E0	GO_BP
Cluster1	cellular homeostasis	4	36	15	254	1.88	0.147	P09528 P33611 Q6P5F6 Q8K4E0	GO_BP
Cluster1	cellular ion homeostasis	2	36	9	254	1.57	0.373	P09528 Q6P5F6	GO_BP
Cluster1	cellular iron ion homeostasis	1	36	1	254	7.06	0.142	P09528	GO_BP
Cluster1	cellular localization	12	36	55	254	1.54	0.0569	O35625 P09528 P33611 P62751 Q52KI8 Q8K0F1 Q8K1M6 Q8K2T8 Q8K4E0 Q8R0F5 Q8R1Q8 Q9R0L6	GO_BP
Cluster1	cellular macromolecule biosynthetic process	10	36	40	254	1.76	0.0347	E9Q5F9 O08784 P33611 P49717 P57776 P62751 Q8K2T8 Q99MN1 Q99PL5 Q9CR57	GO_BP
Cluster1	cellular macromolecule catabolic process	1	36	12	254	0.59	0.847	P62751	GO_BP
Cluster1	cellular macromolecule localization	6	36	33	254	1.28	0.316	P33611 P62751 Q52KI8 Q8K2T8 Q8R0F5 Q9R0L6	GO_BP
Cluster1	cellular macromolecule metabolic process	19	36	102	254	1.31	0.0699	A2AR02 E9Q5F9 O08784 O35625 P09103 P33611 P49717 P57776 P62751 Q0VBL3 Q61083 Q6P1G2 Q8BTW9 Q8BWJ3 Q8K2T8 Q8N7N5 Q99MN1 Q99PL5 Q9CR57	GO_BP
Cluster1	cellular metabolic process	24	36	137	254	1.24	0.0694	A2AR02 E9Q5F9 O08784 O35625 P09103 P33611 P49717 P57776 P62751 Q0VBL3 Q52KI8 Q61083 Q6NV83 Q6P1G2 Q8BTW9 Q8BWJ3 Q8K2T8 Q8N7N5 Q8R0F5 Q99MN1 Q99PL5 Q9CR57 Q9R1C7 Q9Z0U1	GO_BP
Cluster1	cellular metal ion homeostasis	2	36	7	254	2.02	0.26	P09528 Q6P5F6	GO_BP
Cluster1	cellular modified amino acid metabolic process	1	36	2	254	3.53	0.264	P09103	GO_BP
Cluster1	cellular nitrogen compound biosynthetic process	10	36	42	254	1.68	0.0483	E9Q5F9 O08784 P33611 P57776 P62751 Q8K2T8 Q99MN1 Q99PL5 Q9CR57 Q9Z0U1	GO_BP
Cluster1	cellular nitrogen compound catabolic process	1	36	6	254	1.18	0.604	P62751	GO_BP
Cluster1	cellular nitrogen compound metabolic process	18	36	79	254	1.61	0.00844	A2AR02 E9Q5F9 O08784 O35625 P33611 P49717 P57776 P62751 Q0VBL3 Q52KI8 Q6NV83 Q8K2T8 Q8R0F5 Q99MN1 Q99PL5 Q9CR57 Q9R1C7 Q9Z0U1	GO_BP
Cluster1	cellular process	35	36	221	254	1.12	0.0326	A2AR02 E9Q5F9 O08784 O35625 P09103 P09528 P33611 P49717 P57776 P62751 Q0VBL3 Q52KI8 Q61083 Q62433 Q6NV83 Q6P1G2 Q6P5F6 Q7TSC1 Q8BKG3 Q8BKI2 Q8BTW9 Q8BWJ3 Q8K0F1 Q8K1M6 Q8K2T8 Q8K4E0 Q8N7N5 Q8R0F5 Q8R1Q8 Q99MN1 Q99PL5 Q9CR57 Q9R0L6 Q9R1C7 Q9Z0U1	GO_BP
Cluster1	cellular protein localization	6	36	33	254	1.28	0.316	P33611 P62751 Q52KI8 Q8K2T8 Q8R0F5 Q9R0L6	GO_BP
Cluster1	cellular protein metabolic process	14	36	71	254	1.39	0.0864	A2AR02 E9Q5F9 O35625 P09103 P62751 Q61083 Q6P1G2 Q8BTW9 Q8BWJ3 Q8K2T8 Q8N7N5 Q99MN1 Q99PL5 Q9CR57	GO_BP
Cluster1	cellular protein modification process	11	36	62	254	1.25	0.233	A2AR02 E9Q5F9 O35625 P09103 Q61083 Q6P1G2 Q8BTW9 Q8BWJ3 Q8K2T8 Q8N7N5 Q99MN1	GO_BP
Cluster1	cellular protein-containing complex assembly	3	36	17	254	1.25	0.443	O35625 P62751 Q8K1M6	GO_BP
Cluster1	cellular response to abiotic stimulus	2	36	7	254	2.02	0.26	P57776 Q61083	GO_BP
Cluster1	cellular response to acid chemical	1	36	2	254	3.53	0.264	Q8BKG3	GO_BP
Cluster1	cellular response to biotic stimulus	1	36	6	254	1.18	0.604	Q8K2T8	GO_BP
Cluster1	cellular response to chemical stimulus	8	36	52	254	1.09	0.464	P09103 Q0VBL3 Q62433 Q8BKG3 Q8K2T8 Q8R1Q8 Q99MN1 Q9Z0U1	GO_BP
Cluster1	cellular response to cytokine stimulus	4	36	16	254	1.76	0.176	P09103 Q0VBL3 Q99MN1 Q9Z0U1	GO_BP
Cluster1	cellular response to decreased oxygen levels	2	36	3	254	4.7	0.0535	P09103 Q62433	GO_BP
Cluster1	cellular response to DNA damage stimulus	2	36	16	254	0.88	0.693	E9Q5F9 Q62433	GO_BP
Cluster1	cellular response to endogenous stimulus	1	36	26	254	0.27	0.985	Q8R1Q8	GO_BP
Cluster1	cellular response to environmental stimulus	2	36	7	254	2.02	0.26	P57776 Q61083	GO_BP
Cluster1	cellular response to external stimulus	1	36	10	254	0.71	0.79	Q61083	GO_BP
Cluster1	cellular response to growth factor stimulus	1	36	12	254	0.59	0.847	Q8R1Q8	GO_BP
Cluster1	cellular response to hypoxia	2	36	3	254	4.7	0.0535	P09103 Q62433	GO_BP
Cluster1	cellular response to interleukin-12	1	36	1	254	7.06	0.142	P09103	GO_BP
Cluster1	cellular response to ionizing radiation	1	36	1	254	7.06	0.142	P57776	GO_BP
Cluster1	cellular response to lipid	2	36	13	254	1.09	0.574	Q8BKG3 Q8K2T8	GO_BP
Cluster1	cellular response to lipopolysaccharide	1	36	6	254	1.18	0.604	Q8K2T8	GO_BP
Cluster1	cellular response to mechanical stimulus	1	36	3	254	2.35	0.369	Q61083	GO_BP
Cluster1	cellular response to molecule of bacterial origin	1	36	6	254	1.18	0.604	Q8K2T8	GO_BP
Cluster1	cellular response to nerve growth factor stimulus	1	36	1	254	7.06	0.142	Q8R1Q8	GO_BP
Cluster1	cellular response to organic substance	7	36	43	254	1.15	0.409	P09103 Q0VBL3 Q8BKG3 Q8K2T8 Q8R1Q8 Q99MN1 Q9Z0U1	GO_BP
Cluster1	cellular response to oxygen levels	2	36	3	254	4.7	0.0535	P09103 Q62433	GO_BP
Cluster1	cellular response to oxygen-containing compound	2	36	20	254	0.71	0.809	Q8BKG3 Q8K2T8	GO_BP
Cluster1	cellular response to radiation	1	36	1	254	7.06	0.142	P57776	GO_BP
Cluster1	cellular response to retinoic acid	1	36	1	254	7.06	0.142	Q8BKG3	GO_BP
Cluster1	cellular response to stimulus	17	36	112	254	1.07	0.409	E9Q5F9 O35625 P09103 P57776 Q0VBL3 Q61083 Q62433 Q8BKG3 Q8BKI2 Q8BTW9 Q8K1M6 Q8K2T8 Q8K4E0 Q8R1Q8 Q99MN1 Q99PL5 Q9Z0U1	GO_BP
Cluster1	cellular response to stress	6	36	40	254	1.06	0.517	E9Q5F9 O35625 P09103 Q61083 Q62433 Q8BTW9	GO_BP
Cluster1	cellular response to tumor necrosis factor	2	36	8	254	1.76	0.317	Q99MN1 Q9Z0U1	GO_BP
Cluster1	cellular transition metal ion homeostasis	2	36	2	254	7.06	0.0196	P09528 Q6P5F6	GO_BP
Cluster1	cellular zinc ion homeostasis	1	36	1	254	7.06	0.142	Q6P5F6	GO_BP
Cluster1	central nervous system development	6	36	25	254	1.69	0.121	E9Q5F9 O35625 Q6P1G2 Q8K0F1 Q924A2 Q9R0L6	GO_BP
Cluster1	central nervous system neuron differentiation	1	36	4	254	1.76	0.46	O35625	GO_BP
Cluster1	centrosome cycle	1	36	2	254	3.53	0.264	Q9R0L6	GO_BP
Cluster1	chemical homeostasis	3	36	17	254	1.25	0.443	P09528 Q6P5F6 Q8K4E0	GO_BP
Cluster1	chemokine-mediated signaling pathway	1	36	1	254	7.06	0.142	Q0VBL3	GO_BP
Cluster1	cholesterol homeostasis	1	36	1	254	7.06	0.142	Q8K4E0	GO_BP
Cluster1	chordate embryonic development	5	36	25	254	1.41	0.269	E9Q5F9 O08784 O35625 Q6P1G2 Q8BKG3	GO_BP
Cluster1	chromatin assembly	1	36	4	254	1.76	0.46	Q8K2T8	GO_BP
Cluster1	chromatin assembly or disassembly	1	36	5	254	1.41	0.537	Q8K2T8	GO_BP
Cluster1	chromatin organization	3	36	16	254	1.32	0.402	E9Q5F9 Q6P1G2 Q8K2T8	GO_BP
Cluster1	chromosome organization	5	36	25	254	1.41	0.269	E9Q5F9 P33611 P49717 Q6P1G2 Q8K2T8	GO_BP
Cluster1	chylomicron assembly	1	36	1	254	7.06	0.142	P09103	GO_BP
Cluster1	ciliary basal body-plasma membrane docking	2	36	4	254	3.53	0.0975	Q8K4E0 Q9R0L6	GO_BP
Cluster1	cilium assembly	2	36	6	254	2.35	0.203	Q8K4E0 Q9R0L6	GO_BP
Cluster1	cilium organization	2	36	6	254	2.35	0.203	Q8K4E0 Q9R0L6	GO_BP
Cluster1	circulatory system development	3	36	20	254	1.06	0.561	E9Q5F9 Q0VBL3 Q8BKG3	GO_BP
Cluster1	cochlea development	1	36	3	254	2.35	0.369	Q8BKG3	GO_BP
Cluster1	cochlea morphogenesis	1	36	2	254	3.53	0.264	Q8BKG3	GO_BP
Cluster1	cognition	1	36	4	254	1.76	0.46	Q924A2	GO_BP
Cluster1	convergent extension	1	36	1	254	7.06	0.142	Q8BKG3	GO_BP
Cluster1	coronary vasculature development	2	36	3	254	4.7	0.0535	E9Q5F9 Q8BKG3	GO_BP
Cluster1	coronary vasculature morphogenesis	1	36	2	254	3.53	0.264	E9Q5F9	GO_BP
Cluster1	cotranslational protein targeting to membrane	1	36	1	254	7.06	0.142	P62751	GO_BP
Cluster1	covalent chromatin modification	3	36	13	254	1.63	0.275	E9Q5F9 Q6P1G2 Q8K2T8	GO_BP
Cluster1	cranial skeletal system development	1	36	2	254	3.53	0.264	E9Q5F9	GO_BP
Cluster1	cytokine-mediated signaling pathway	4	36	9	254	3.14	0.0256	P09103 Q0VBL3 Q99MN1 Q9Z0U1	GO_BP
Cluster1	cytoplasmic microtubule organization	2	36	2	254	7.06	0.0196	O35625 Q9R0L6	GO_BP
Cluster1	cytoskeleton organization	7	36	29	254	1.7	0.093	E9Q5F9 O35625 Q8BKG3 Q8BTW9 Q8R1Q8 Q9R0L6 Q9R1C7	GO_BP
Cluster1	cytoskeleton-dependent intracellular transport	1	36	4	254	1.76	0.46	Q9R0L6	GO_BP
Cluster1	cytosolic transport	1	36	6	254	1.18	0.604	Q8K0F1	GO_BP
Cluster1	defense response	1	36	7	254	1.01	0.662	E9Q5F9	GO_BP
Cluster1	defense response to other organism	1	36	4	254	1.76	0.46	E9Q5F9	GO_BP
Cluster1	defense response to virus	1	36	1	254	7.06	0.142	E9Q5F9	GO_BP
Cluster1	demethylation	1	36	3	254	2.35	0.369	Q6P1G2	GO_BP
Cluster1	determination of bilateral symmetry	1	36	1	254	7.06	0.142	O35625	GO_BP
Cluster1	determination of left/right symmetry	1	36	1	254	7.06	0.142	O35625	GO_BP
Cluster1	developmental growth	1	36	6	254	1.18	0.604	Q8BKG3	GO_BP
Cluster1	developmental growth involved in morphogenesis	1	36	1	254	7.06	0.142	Q8BKG3	GO_BP
Cluster1	developmental process	15	36	97	254	1.09	0.387	E9Q5F9 O08784 O35625 Q0VBL3 Q62433 Q6P1G2 Q7TSC1 Q8BKG3 Q8K0F1 Q8K1M6 Q8K2T8 Q8K4E0 Q924A2 Q9R0L6 Q9Z0U1	GO_BP
Cluster1	developmental process involved in reproduction	3	36	14	254	1.51	0.317	E9Q5F9 Q0VBL3 Q8K4E0	GO_BP
Cluster1	diadenosine polyphosphate biosynthetic process	1	36	3	254	2.35	0.369	Q99MN1	GO_BP
Cluster1	diadenosine polyphosphate metabolic process	1	36	3	254	2.35	0.369	Q99MN1	GO_BP
Cluster1	diadenosine tetraphosphate biosynthetic process	1	36	3	254	2.35	0.369	Q99MN1	GO_BP
Cluster1	diadenosine tetraphosphate metabolic process	1	36	3	254	2.35	0.369	Q99MN1	GO_BP
Cluster1	digestion	1	36	1	254	7.06	0.142	Q9Z0U1	GO_BP
Cluster1	digestive system process	1	36	1	254	7.06	0.142	Q9Z0U1	GO_BP
Cluster1	divalent inorganic cation homeostasis	1	36	5	254	1.41	0.537	Q6P5F6	GO_BP
Cluster1	divalent inorganic cation transport	1	36	6	254	1.18	0.604	Q6P5F6	GO_BP
Cluster1	divalent metal ion transport	1	36	6	254	1.18	0.604	Q6P5F6	GO_BP
Cluster1	DNA biosynthetic process	1	36	4	254	1.76	0.46	P33611	GO_BP
Cluster1	DNA conformation change	2	36	8	254	1.76	0.317	P49717 Q8K2T8	GO_BP
Cluster1	DNA duplex unwinding	1	36	3	254	2.35	0.369	P49717	GO_BP
Cluster1	DNA geometric change	1	36	3	254	2.35	0.369	P49717	GO_BP
Cluster1	DNA metabolic process	3	36	12	254	1.76	0.233	E9Q5F9 P33611 P49717	GO_BP
Cluster1	DNA packaging	1	36	5	254	1.41	0.537	Q8K2T8	GO_BP
Cluster1	DNA repair	1	36	8	254	0.88	0.711	E9Q5F9	GO_BP
Cluster1	DNA replication	2	36	4	254	3.53	0.0975	P33611 P49717	GO_BP
Cluster1	DNA replication initiation	1	36	1	254	7.06	0.142	P33611	GO_BP
Cluster1	DNA unwinding involved in DNA replication	1	36	1	254	7.06	0.142	P49717	GO_BP
Cluster1	DNA-dependent DNA replication	2	36	4	254	3.53	0.0975	P33611 P49717	GO_BP
Cluster1	DNA-templated transcription, elongation	2	36	4	254	3.53	0.0975	E9Q5F9 Q8K2T8	GO_BP
Cluster1	dorsal/ventral axis specification	1	36	1	254	7.06	0.142	O35625	GO_BP
Cluster1	dorsal/ventral pattern formation	1	36	1	254	7.06	0.142	O35625	GO_BP
Cluster1	dosage compensation	1	36	2	254	3.53	0.264	Q0VBL3	GO_BP
Cluster1	ear development	2	36	8	254	1.76	0.317	Q8BKG3 Q8K4E0	GO_BP
Cluster1	ear morphogenesis	1	36	5	254	1.41	0.537	Q8BKG3	GO_BP
Cluster1	ectodermal placode development	1	36	2	254	3.53	0.264	O35625	GO_BP
Cluster1	ectodermal placode formation	1	36	2	254	3.53	0.264	O35625	GO_BP
Cluster1	ectodermal placode morphogenesis	1	36	2	254	3.53	0.264	O35625	GO_BP
Cluster1	embryo development	7	36	31	254	1.59	0.126	E9Q5F9 O08784 O35625 Q6P1G2 Q8BKG3 Q8K0F1 Q8K2T8	GO_BP
Cluster1	embryo development ending in birth or egg hatching	5	36	25	254	1.41	0.269	E9Q5F9 O08784 O35625 Q6P1G2 Q8BKG3	GO_BP
Cluster1	embryonic brain development	1	36	1	254	7.06	0.142	Q8K0F1	GO_BP
Cluster1	embryonic camera-type eye development	1	36	2	254	3.53	0.264	Q6P1G2	GO_BP
Cluster1	embryonic camera-type eye morphogenesis	1	36	2	254	3.53	0.264	Q6P1G2	GO_BP
Cluster1	embryonic cranial skeleton morphogenesis	1	36	1	254	7.06	0.142	E9Q5F9	GO_BP
Cluster1	embryonic epithelial tube formation	3	36	8	254	2.65	0.0886	E9Q5F9 Q6P1G2 Q8BKG3	GO_BP
Cluster1	embryonic eye morphogenesis	2	36	3	254	4.7	0.0535	O35625 Q6P1G2	GO_BP
Cluster1	embryonic morphogenesis	5	36	20	254	1.76	0.134	E9Q5F9 O35625 Q6P1G2 Q8BKG3 Q8K2T8	GO_BP
Cluster1	embryonic organ development	5	36	18	254	1.96	0.0922	E9Q5F9 O35625 Q6P1G2 Q8BKG3 Q8K0F1	GO_BP
Cluster1	embryonic organ morphogenesis	4	36	10	254	2.82	0.0383	E9Q5F9 O35625 Q6P1G2 Q8BKG3	GO_BP
Cluster1	embryonic placenta development	1	36	8	254	0.88	0.711	E9Q5F9	GO_BP
Cluster1	embryonic placenta morphogenesis	1	36	3	254	2.35	0.369	E9Q5F9	GO_BP
Cluster1	embryonic skeletal joint development	1	36	1	254	7.06	0.142	O35625	GO_BP
Cluster1	embryonic skeletal joint morphogenesis	1	36	1	254	7.06	0.142	O35625	GO_BP
Cluster1	embryonic skeletal system development	2	36	3	254	4.7	0.0535	E9Q5F9 O35625	GO_BP
Cluster1	embryonic skeletal system morphogenesis	2	36	3	254	4.7	0.0535	E9Q5F9 O35625	GO_BP
Cluster1	endoderm development	2	36	4	254	3.53	0.0975	E9Q5F9 Q8K2T8	GO_BP
Cluster1	endoderm formation	2	36	3	254	4.7	0.0535	E9Q5F9 Q8K2T8	GO_BP
Cluster1	endodermal cell differentiation	2	36	3	254	4.7	0.0535	E9Q5F9 Q8K2T8	GO_BP
Cluster1	endodermal cell fate commitment	1	36	2	254	3.53	0.264	Q8K2T8	GO_BP
Cluster1	endomembrane system organization	1	36	5	254	1.41	0.537	Q62433	GO_BP
Cluster1	endosomal transport	2	36	12	254	1.18	0.528	Q8K0F1 Q8K4E0	GO_BP
Cluster1	endothelial cell development	1	36	3	254	2.35	0.369	Q9Z0U1	GO_BP
Cluster1	endothelial cell differentiation	1	36	3	254	2.35	0.369	Q9Z0U1	GO_BP
Cluster1	endothelium development	1	36	3	254	2.35	0.369	Q9Z0U1	GO_BP
Cluster1	ensheathment of neurons	1	36	4	254	1.76	0.46	Q62433	GO_BP
Cluster1	epithelial cell development	1	36	7	254	1.01	0.662	Q9Z0U1	GO_BP
Cluster1	epithelial cell differentiation	2	36	12	254	1.18	0.528	Q8BKG3 Q9Z0U1	GO_BP
Cluster1	epithelial cell proliferation	1	36	3	254	2.35	0.369	Q8K4E0	GO_BP
Cluster1	epithelial to mesenchymal transition	1	36	4	254	1.76	0.46	O08784	GO_BP
Cluster1	epithelial tube formation	3	36	8	254	2.65	0.0886	E9Q5F9 Q6P1G2 Q8BKG3	GO_BP
Cluster1	epithelial tube morphogenesis	4	36	11	254	2.57	0.0541	E9Q5F9 Q0VBL3 Q6P1G2 Q8BKG3	GO_BP
Cluster1	epithelium development	6	36	25	254	1.69	0.121	E9Q5F9 Q0VBL3 Q6P1G2 Q8BKG3 Q8K4E0 Q9Z0U1	GO_BP
Cluster1	ERK1 and ERK2 cascade	1	36	4	254	1.76	0.46	Q99MN1	GO_BP
Cluster1	establishment of apical/basal cell polarity	1	36	2	254	3.53	0.264	Q8BKG3	GO_BP
Cluster1	establishment of cell polarity	1	36	7	254	1.01	0.662	Q8BKG3	GO_BP
Cluster1	establishment of endothelial barrier	1	36	3	254	2.35	0.369	Q9Z0U1	GO_BP
Cluster1	establishment of endothelial intestinal barrier	1	36	3	254	2.35	0.369	Q9Z0U1	GO_BP
Cluster1	establishment of epithelial cell polarity	1	36	2	254	3.53	0.264	Q8BKG3	GO_BP
Cluster1	establishment of localization	12	36	65	254	1.3	0.172	O35625 P09528 P33611 P62751 Q52KI8 Q6P5F6 Q8K0F1 Q8K4E0 Q8R0F5 Q8R1Q8 Q9R0L6 Q9Z0U1	GO_BP
Cluster1	establishment of localization in cell	9	36	41	254	1.55	0.0978	O35625 P33611 P62751 Q52KI8 Q8K0F1 Q8K4E0 Q8R0F5 Q8R1Q8 Q9R0L6	GO_BP
Cluster1	establishment of monopolar cell polarity	1	36	2	254	3.53	0.264	Q8BKG3	GO_BP
Cluster1	establishment of organelle localization	1	36	8	254	0.88	0.711	Q9R0L6	GO_BP
Cluster1	establishment of planar polarity	2	36	2	254	7.06	0.0196	Q8BKG3 Q8K4E0	GO_BP
Cluster1	establishment of protein localization	4	36	27	254	1.05	0.553	P33611 P62751 Q52KI8 Q8R0F5	GO_BP
Cluster1	establishment of protein localization to membrane	1	36	5	254	1.41	0.537	P62751	GO_BP
Cluster1	establishment of protein localization to organelle	2	36	5	254	2.82	0.148	P33611 P62751	GO_BP
Cluster1	establishment of RNA localization	2	36	8	254	1.76	0.317	Q52KI8 Q8R0F5	GO_BP
Cluster1	establishment of tissue polarity	2	36	2	254	7.06	0.0196	Q8BKG3 Q8K4E0	GO_BP
Cluster1	establishment or maintenance of cell polarity	1	36	10	254	0.71	0.79	Q8BKG3	GO_BP
Cluster1	execution phase of apoptosis	1	36	2	254	3.53	0.264	Q8K1M6	GO_BP
Cluster1	exocytosis	1	36	9	254	0.78	0.753	Q8R1Q8	GO_BP
Cluster1	extracellular structure organization	1	36	3	254	2.35	0.369	P09103	GO_BP
Cluster1	eye development	3	36	9	254	2.35	0.12	O35625 Q6P1G2 Q8K4E0	GO_BP
Cluster1	eye morphogenesis	3	36	6	254	3.53	0.0388	O35625 Q6P1G2 Q8K4E0	GO_BP
Cluster1	eye photoreceptor cell development	1	36	1	254	7.06	0.142	Q8K4E0	GO_BP
Cluster1	eye photoreceptor cell differentiation	1	36	1	254	7.06	0.142	Q8K4E0	GO_BP
Cluster1	fat cell differentiation	1	36	2	254	3.53	0.264	Q8K4E0	GO_BP
Cluster1	female gamete generation	1	36	3	254	2.35	0.369	Q8K4E0	GO_BP
Cluster1	forebrain anterior/posterior pattern specification	1	36	1	254	7.06	0.142	O35625	GO_BP
Cluster1	forebrain development	4	36	13	254	2.17	0.0948	E9Q5F9 O35625 Q6P1G2 Q9R0L6	GO_BP
Cluster1	forebrain generation of neurons	1	36	1	254	7.06	0.142	O35625	GO_BP
Cluster1	forebrain neuron differentiation	1	36	1	254	7.06	0.142	O35625	GO_BP
Cluster1	forebrain neuron fate commitment	1	36	1	254	7.06	0.142	O35625	GO_BP
Cluster1	forebrain regionalization	1	36	1	254	7.06	0.142	O35625	GO_BP
Cluster1	formation of primary germ layer	3	36	4	254	5.29	0.00954	E9Q5F9 O35625 Q8K2T8	GO_BP
Cluster1	fourth ventricle development	1	36	1	254	7.06	0.142	Q6P1G2	GO_BP
Cluster1	G1/S transition of mitotic cell cycle	2	36	4	254	3.53	0.0975	P33611 P49717	GO_BP
Cluster1	G2/M transition of mitotic cell cycle	2	36	4	254	3.53	0.0975	Q8K4E0 Q9R0L6	GO_BP
Cluster1	gamete generation	2	36	6	254	2.35	0.203	Q6P1G2 Q8K4E0	GO_BP
Cluster1	gastrulation	3	36	6	254	3.53	0.0388	E9Q5F9 O35625 Q8K2T8	GO_BP
Cluster1	GDP metabolic process	1	36	2	254	3.53	0.264	Q9Z0U1	GO_BP
Cluster1	gene expression	14	36	63	254	1.57	0.0318	A2AR02 E9Q5F9 O08784 P57776 P62751 Q0VBL3 Q52KI8 Q6NV83 Q8K2T8 Q8R0F5 Q99MN1 Q99PL5 Q9CR57 Q9R1C7	GO_BP
Cluster1	gene silencing	1	36	7	254	1.01	0.662	Q8BKI2	GO_BP
Cluster1	gene silencing by RNA	1	36	5	254	1.41	0.537	Q8BKI2	GO_BP
Cluster1	generation of neurons	5	36	35	254	1.01	0.577	O35625 Q8BKG3 Q8K0F1 Q8K4E0 Q9R0L6	GO_BP
Cluster1	generation of precursor metabolites and energy	1	36	5	254	1.41	0.537	Q8BWJ3	GO_BP
Cluster1	genetic imprinting	1	36	1	254	7.06	0.142	O35625	GO_BP
Cluster1	germ cell development	1	36	1	254	7.06	0.142	Q8K4E0	GO_BP
Cluster1	glial cell development	1	36	3	254	2.35	0.369	Q62433	GO_BP
Cluster1	glial cell differentiation	1	36	7	254	1.01	0.662	Q62433	GO_BP
Cluster1	gliogenesis	1	36	8	254	0.88	0.711	Q62433	GO_BP
Cluster1	glucose homeostasis	1	36	5	254	1.41	0.537	Q8K4E0	GO_BP
Cluster1	glycosyl compound metabolic process	1	36	4	254	1.76	0.46	Q9Z0U1	GO_BP
Cluster1	GMP metabolic process	1	36	2	254	3.53	0.264	Q9Z0U1	GO_BP
Cluster1	Golgi vesicle transport	1	36	6	254	1.18	0.604	Q8R1Q8	GO_BP
Cluster1	granulocyte activation	2	36	6	254	2.35	0.203	Q8R1Q8 Q99MN1	GO_BP
Cluster1	growth	1	36	7	254	1.01	0.662	Q8BKG3	GO_BP
Cluster1	guanosine-containing compound metabolic process	1	36	2	254	3.53	0.264	Q9Z0U1	GO_BP
Cluster1	head development	6	36	25	254	1.69	0.121	E9Q5F9 O35625 Q6P1G2 Q8K0F1 Q924A2 Q9R0L6	GO_BP
Cluster1	heart development	3	36	17	254	1.25	0.443	E9Q5F9 Q0VBL3 Q8BKG3	GO_BP
Cluster1	heart morphogenesis	1	36	6	254	1.18	0.604	Q0VBL3	GO_BP
Cluster1	hematopoietic or lymphoid organ development	1	36	16	254	0.44	0.92	Q0VBL3	GO_BP
Cluster1	heterocycle biosynthetic process	7	36	36	254	1.37	0.229	E9Q5F9 O08784 P33611 P57776 Q8K2T8 Q99MN1 Q9Z0U1	GO_BP
Cluster1	heterocycle catabolic process	1	36	6	254	1.18	0.604	P62751	GO_BP
Cluster1	heterocycle metabolic process	17	36	76	254	1.58	0.0141	A2AR02 E9Q5F9 O08784 O35625 P33611 P49717 P57776 P62751 Q0VBL3 Q52KI8 Q6NV83 Q8K2T8 Q8R0F5 Q99MN1 Q9CR57 Q9R1C7 Q9Z0U1	GO_BP
Cluster1	hindbrain development	1	36	3	254	2.35	0.369	Q6P1G2	GO_BP
Cluster1	hippo signaling	1	36	2	254	3.53	0.264	Q9Z0U1	GO_BP
Cluster1	histone demethylation	1	36	3	254	2.35	0.369	Q6P1G2	GO_BP
Cluster1	histone H2A monoubiquitination	1	36	1	254	7.06	0.142	Q6P1G2	GO_BP
Cluster1	histone H2A ubiquitination	1	36	1	254	7.06	0.142	Q6P1G2	GO_BP
Cluster1	histone H2B ubiquitination	1	36	2	254	3.53	0.264	Q8K2T8	GO_BP
Cluster1	histone H3-K36 demethylation	1	36	1	254	7.06	0.142	Q6P1G2	GO_BP
Cluster1	histone H3-K36 dimethylation	1	36	1	254	7.06	0.142	E9Q5F9	GO_BP
Cluster1	histone H3-K36 methylation	1	36	1	254	7.06	0.142	E9Q5F9	GO_BP
Cluster1	histone H3-K36 trimethylation	1	36	1	254	7.06	0.142	E9Q5F9	GO_BP
Cluster1	histone lysine demethylation	1	36	3	254	2.35	0.369	Q6P1G2	GO_BP
Cluster1	histone lysine methylation	1	36	1	254	7.06	0.142	E9Q5F9	GO_BP
Cluster1	histone methylation	1	36	1	254	7.06	0.142	E9Q5F9	GO_BP
Cluster1	histone modification	3	36	12	254	1.76	0.233	E9Q5F9 Q6P1G2 Q8K2T8	GO_BP
Cluster1	histone monoubiquitination	2	36	3	254	4.7	0.0535	Q6P1G2 Q8K2T8	GO_BP
Cluster1	histone ubiquitination	2	36	3	254	4.7	0.0535	Q6P1G2 Q8K2T8	GO_BP
Cluster1	homeostatic process	4	36	26	254	1.09	0.52	P09528 P33611 Q6P5F6 Q8K4E0	GO_BP
Cluster1	immune effector process	3	36	12	254	1.76	0.233	E9Q5F9 Q8R1Q8 Q99MN1	GO_BP
Cluster1	immune response	4	36	12	254	2.35	0.073	E9Q5F9 P09528 Q8R1Q8 Q99MN1	GO_BP
Cluster1	immune system development	1	36	16	254	0.44	0.92	Q0VBL3	GO_BP
Cluster1	immune system process	6	36	29	254	1.46	0.21	E9Q5F9 P09528 Q0VBL3 Q62433 Q8R1Q8 Q99MN1	GO_BP
Cluster1	import across plasma membrane	1	36	2	254	3.53	0.264	Q6P5F6	GO_BP
Cluster1	import into cell	1	36	14	254	0.5	0.889	Q6P5F6	GO_BP
Cluster1	import into nucleus	1	36	2	254	3.53	0.264	P33611	GO_BP
Cluster1	in utero embryonic development	2	36	16	254	0.88	0.693	E9Q5F9 O35625	GO_BP
Cluster1	initiation of neural tube closure	1	36	1	254	7.06	0.142	Q6P1G2	GO_BP
Cluster1	innate immune response	1	36	2	254	3.53	0.264	E9Q5F9	GO_BP
Cluster1	inner ear development	2	36	5	254	2.82	0.148	Q8BKG3 Q8K4E0	GO_BP
Cluster1	inner ear morphogenesis	1	36	3	254	2.35	0.369	Q8BKG3	GO_BP
Cluster1	inner ear receptor cell development	1	36	2	254	3.53	0.264	Q8K4E0	GO_BP
Cluster1	inner ear receptor cell differentiation	1	36	3	254	2.35	0.369	Q8K4E0	GO_BP
Cluster1	inner ear receptor cell stereocilium organization	1	36	2	254	3.53	0.264	Q8K4E0	GO_BP
Cluster1	inorganic cation import across plasma membrane	1	36	2	254	3.53	0.264	Q6P5F6	GO_BP
Cluster1	inorganic cation transmembrane transport	1	36	6	254	1.18	0.604	Q6P5F6	GO_BP
Cluster1	inorganic ion homeostasis	2	36	9	254	1.57	0.373	P09528 Q6P5F6	GO_BP
Cluster1	inorganic ion import across plasma membrane	1	36	2	254	3.53	0.264	Q6P5F6	GO_BP
Cluster1	inorganic ion transmembrane transport	1	36	9	254	0.78	0.753	Q6P5F6	GO_BP
Cluster1	interkinetic nuclear migration	1	36	3	254	2.35	0.369	Q9R0L6	GO_BP
Cluster1	interleukin-12-mediated signaling pathway	1	36	1	254	7.06	0.142	P09103	GO_BP
Cluster1	interleukin-23-mediated signaling pathway	1	36	1	254	7.06	0.142	P09103	GO_BP
Cluster1	intestinal absorption	1	36	1	254	7.06	0.142	Q9Z0U1	GO_BP
Cluster1	intracellular distribution of mitochondria	1	36	1	254	7.06	0.142	Q8K1M6	GO_BP
Cluster1	intracellular protein transport	4	36	21	254	1.34	0.345	P33611 P62751 Q52KI8 Q8R0F5	GO_BP
Cluster1	intracellular sequestering of iron ion	1	36	1	254	7.06	0.142	P09528	GO_BP
Cluster1	intracellular signal transduction	7	36	39	254	1.27	0.303	O35625 Q61083 Q62433 Q8BTW9 Q8K4E0 Q99MN1 Q9Z0U1	GO_BP
Cluster1	intracellular transport	9	36	38	254	1.67	0.0636	O35625 P33611 P62751 Q52KI8 Q8K0F1 Q8K4E0 Q8R0F5 Q8R1Q8 Q9R0L6	GO_BP
Cluster1	intraciliary transport	1	36	1	254	7.06	0.142	Q9R0L6	GO_BP
Cluster1	intraciliary transport involved in cilium assembly	1	36	1	254	7.06	0.142	Q9R0L6	GO_BP
Cluster1	intraspecies interaction between organisms	2	36	2	254	7.06	0.0196	Q924A2 Q9R0L6	GO_BP
Cluster1	ion homeostasis	2	36	10	254	1.41	0.427	P09528 Q6P5F6	GO_BP
Cluster1	ion transmembrane transport	1	36	9	254	0.78	0.753	Q6P5F6	GO_BP
Cluster1	ion transport	2	36	12	254	1.18	0.528	P09528 Q6P5F6	GO_BP
Cluster1	iron ion homeostasis	1	36	1	254	7.06	0.142	P09528	GO_BP
Cluster1	iron ion transport	1	36	2	254	3.53	0.264	P09528	GO_BP
Cluster1	JNK cascade	2	36	4	254	3.53	0.0975	O35625 Q61083	GO_BP
Cluster1	lateral ventricle development	1	36	1	254	7.06	0.142	Q6P1G2	GO_BP
Cluster1	learning	1	36	3	254	2.35	0.369	Q924A2	GO_BP
Cluster1	learning or memory	1	36	4	254	1.76	0.46	Q924A2	GO_BP
Cluster1	leukocyte activation	3	36	16	254	1.32	0.402	Q62433 Q8R1Q8 Q99MN1	GO_BP
Cluster1	leukocyte activation involved in immune response	2	36	7	254	2.02	0.26	Q8R1Q8 Q99MN1	GO_BP
Cluster1	leukocyte degranulation	1	36	5	254	1.41	0.537	Q8R1Q8	GO_BP
Cluster1	leukocyte mediated immunity	1	36	6	254	1.18	0.604	Q8R1Q8	GO_BP
Cluster1	lipid homeostasis	1	36	2	254	3.53	0.264	Q8K4E0	GO_BP
Cluster1	lipid metabolic process	1	36	8	254	0.88	0.711	Q8K4E0	GO_BP
Cluster1	localization	18	36	91	254	1.4	0.0438	E9Q5F9 O35625 P09528 P33611 P62751 Q52KI8 Q6P5F6 Q8BKG3 Q8BTW9 Q8K0F1 Q8K1M6 Q8K2T8 Q8K4E0 Q8R0F5 Q8R1Q8 Q9R0L6 Q9R1C7 Q9Z0U1	GO_BP
Cluster1	localization of cell	5	36	19	254	1.86	0.112	E9Q5F9 Q8BKG3 Q8BTW9 Q9R0L6 Q9R1C7	GO_BP
Cluster1	locomotion	5	36	24	254	1.47	0.239	E9Q5F9 Q8BKG3 Q8BTW9 Q9R0L6 Q9R1C7	GO_BP
Cluster1	lung alveolus development	1	36	2	254	3.53	0.264	Q924A2	GO_BP
Cluster1	lung development	2	36	8	254	1.76	0.317	Q8BKG3 Q924A2	GO_BP
Cluster1	lung-associated mesenchyme development	1	36	1	254	7.06	0.142	Q8BKG3	GO_BP
Cluster1	lysyl-tRNA aminoacylation	1	36	1	254	7.06	0.142	Q99MN1	GO_BP
Cluster1	macromolecule biosynthetic process	10	36	41	254	1.72	0.0411	E9Q5F9 O08784 P33611 P49717 P57776 P62751 Q8K2T8 Q99MN1 Q99PL5 Q9CR57	GO_BP
Cluster1	macromolecule catabolic process	2	36	15	254	0.94	0.657	O35625 P62751	GO_BP
Cluster1	macromolecule localization	6	36	42	254	1.01	0.572	P33611 P62751 Q52KI8 Q8K2T8 Q8R0F5 Q9R0L6	GO_BP
Cluster1	macromolecule metabolic process	23	36	125	254	1.3	0.0422	A2AR02 E9Q5F9 O08784 O35625 P09103 P33611 P49717 P57776 P62751 Q0VBL3 Q52KI8 Q61083 Q6NV83 Q6P1G2 Q8BTW9 Q8BWJ3 Q8K2T8 Q8N7N5 Q8R0F5 Q99MN1 Q99PL5 Q9CR57 Q9R1C7	GO_BP
Cluster1	macromolecule methylation	2	36	6	254	2.35	0.203	E9Q5F9 Q0VBL3	GO_BP
Cluster1	macromolecule modification	12	36	70	254	1.21	0.258	A2AR02 E9Q5F9 O35625 P09103 Q0VBL3 Q61083 Q6P1G2 Q8BTW9 Q8BWJ3 Q8K2T8 Q8N7N5 Q99MN1	GO_BP
Cluster1	maintenance of cell number	2	36	9	254	1.57	0.373	Q8K2T8 Q9R0L6	GO_BP
Cluster1	maintenance of location	1	36	2	254	3.53	0.264	P09528	GO_BP
Cluster1	maintenance of location in cell	1	36	2	254	3.53	0.264	P09528	GO_BP
Cluster1	male gamete generation	2	36	4	254	3.53	0.0975	Q6P1G2 Q8K4E0	GO_BP
Cluster1	MAPK cascade	3	36	12	254	1.76	0.233	O35625 Q61083 Q99MN1	GO_BP
Cluster1	mast cell activation	1	36	1	254	7.06	0.142	Q62433	GO_BP
Cluster1	mechanoreceptor differentiation	1	36	3	254	2.35	0.369	Q8K4E0	GO_BP
Cluster1	membrane docking	2	36	5	254	2.82	0.148	Q8K4E0 Q9R0L6	GO_BP
Cluster1	membrane fission	1	36	1	254	7.06	0.142	Q8K1M6	GO_BP
Cluster1	membrane fusion	1	36	2	254	3.53	0.264	Q8K1M6	GO_BP
Cluster1	membrane organization	2	36	13	254	1.09	0.574	Q62433 Q8K1M6	GO_BP
Cluster1	memory	1	36	2	254	3.53	0.264	Q924A2	GO_BP
Cluster1	mesenchymal cell development	1	36	4	254	1.76	0.46	O08784	GO_BP
Cluster1	mesenchymal cell differentiation	1	36	6	254	1.18	0.604	O08784	GO_BP
Cluster1	mesenchyme development	2	36	7	254	2.02	0.26	O08784 Q8BKG3	GO_BP
Cluster1	mesoderm development	2	36	2	254	7.06	0.0196	E9Q5F9 O35625	GO_BP
Cluster1	mesoderm formation	1	36	1	254	7.06	0.142	O35625	GO_BP
Cluster1	mesoderm morphogenesis	2	36	2	254	7.06	0.0196	E9Q5F9 O35625	GO_BP
Cluster1	metabolic process	25	36	139	254	1.27	0.0401	A2AR02 E9Q5F9 O08784 O35625 P09103 P33611 P49717 P57776 P62751 Q0VBL3 Q52KI8 Q61083 Q6NV83 Q6P1G2 Q8BTW9 Q8BWJ3 Q8K2T8 Q8K4E0 Q8N7N5 Q8R0F5 Q99MN1 Q99PL5 Q9CR57 Q9R1C7 Q9Z0U1	GO_BP
Cluster1	metal ion homeostasis	2	36	7	254	2.02	0.26	P09528 Q6P5F6	GO_BP
Cluster1	metal ion transport	2	36	8	254	1.76	0.317	P09528 Q6P5F6	GO_BP
Cluster1	methylation	2	36	6	254	2.35	0.203	E9Q5F9 Q0VBL3	GO_BP
Cluster1	microtubule anchoring	1	36	1	254	7.06	0.142	Q9R0L6	GO_BP
Cluster1	microtubule anchoring at centrosome	1	36	1	254	7.06	0.142	Q9R0L6	GO_BP
Cluster1	microtubule cytoskeleton organization	4	36	14	254	2.02	0.119	E9Q5F9 O35625 Q8R1Q8 Q9R0L6	GO_BP
Cluster1	microtubule organizing center organization	1	36	2	254	3.53	0.264	Q9R0L6	GO_BP
Cluster1	microtubule-based movement	2	36	6	254	2.35	0.203	Q8R1Q8 Q9R0L6	GO_BP
Cluster1	microtubule-based process	4	36	16	254	1.76	0.176	E9Q5F9 O35625 Q8R1Q8 Q9R0L6	GO_BP
Cluster1	microtubule-based transport	1	36	4	254	1.76	0.46	Q9R0L6	GO_BP
Cluster1	midbrain development	1	36	4	254	1.76	0.46	Q6P1G2	GO_BP
Cluster1	midbrain-hindbrain boundary development	1	36	1	254	7.06	0.142	Q6P1G2	GO_BP
Cluster1	midbrain-hindbrain boundary morphogenesis	1	36	1	254	7.06	0.142	Q6P1G2	GO_BP
Cluster1	mismatch repair	1	36	1	254	7.06	0.142	E9Q5F9	GO_BP
Cluster1	mitochondrial fission	1	36	2	254	3.53	0.264	Q8K1M6	GO_BP
Cluster1	mitochondrial membrane fission	1	36	1	254	7.06	0.142	Q8K1M6	GO_BP
Cluster1	mitochondrion distribution	1	36	1	254	7.06	0.142	Q8K1M6	GO_BP
Cluster1	mitochondrion localization	1	36	1	254	7.06	0.142	Q8K1M6	GO_BP
Cluster1	mitochondrion morphogenesis	1	36	1	254	7.06	0.142	Q8K1M6	GO_BP
Cluster1	mitochondrion organization	1	36	11	254	0.64	0.821	Q8K1M6	GO_BP
Cluster1	mitotic cell cycle	6	36	17	254	2.49	0.0205	E9Q5F9 P33611 P49717 Q8K4E0 Q8R1Q8 Q9R0L6	GO_BP
Cluster1	mitotic cell cycle phase transition	4	36	8	254	3.53	0.0158	P33611 P49717 Q8K4E0 Q9R0L6	GO_BP
Cluster1	mitotic cell cycle process	6	36	15	254	2.82	0.0103	E9Q5F9 P33611 P49717 Q8K4E0 Q8R1Q8 Q9R0L6	GO_BP
Cluster1	mitotic spindle organization	1	36	2	254	3.53	0.264	Q8R1Q8	GO_BP
Cluster1	morphogenesis of a branching epithelium	1	36	4	254	1.76	0.46	Q0VBL3	GO_BP
Cluster1	morphogenesis of a branching structure	2	36	5	254	2.82	0.148	E9Q5F9 Q0VBL3	GO_BP
Cluster1	morphogenesis of a polarized epithelium	2	36	3	254	4.7	0.0535	Q8BKG3 Q8K4E0	GO_BP
Cluster1	morphogenesis of an epithelium	5	36	16	254	2.2	0.0584	E9Q5F9 Q0VBL3 Q6P1G2 Q8BKG3 Q8K4E0	GO_BP
Cluster1	morphogenesis of embryonic epithelium	3	36	8	254	2.65	0.0886	E9Q5F9 Q6P1G2 Q8BKG3	GO_BP
Cluster1	movement of cell or subcellular component	6	36	29	254	1.46	0.21	E9Q5F9 Q8BKG3 Q8BTW9 Q8R1Q8 Q9R0L6 Q9R1C7	GO_BP
Cluster1	mRNA 3'-end processing	2	36	8	254	1.76	0.317	Q52KI8 Q8K2T8	GO_BP
Cluster1	mRNA catabolic process	1	36	6	254	1.18	0.604	P62751	GO_BP
Cluster1	mRNA export from nucleus	2	36	8	254	1.76	0.317	Q52KI8 Q8R0F5	GO_BP
Cluster1	mRNA metabolic process	8	36	32	254	1.76	0.0603	P57776 P62751 Q0VBL3 Q52KI8 Q6NV83 Q8K2T8 Q8R0F5 Q9R1C7	GO_BP
Cluster1	mRNA polyadenylation	1	36	4	254	1.76	0.46	Q8K2T8	GO_BP
Cluster1	mRNA processing	6	36	26	254	1.63	0.141	Q0VBL3 Q52KI8 Q6NV83 Q8K2T8 Q8R0F5 Q9R1C7	GO_BP
Cluster1	mRNA splicing, via spliceosome	5	36	21	254	1.68	0.158	Q0VBL3 Q52KI8 Q6NV83 Q8R0F5 Q9R1C7	GO_BP
Cluster1	mRNA transcription	1	36	2	254	3.53	0.264	P57776	GO_BP
Cluster1	mRNA transport	2	36	8	254	1.76	0.317	Q52KI8 Q8R0F5	GO_BP
Cluster1	multi-organism process	6	36	25	254	1.69	0.121	E9Q5F9 Q6P1G2 Q8K2T8 Q8K4E0 Q924A2 Q9R0L6	GO_BP
Cluster1	multi-organism reproductive process	2	36	7	254	2.02	0.26	Q6P1G2 Q8K4E0	GO_BP
Cluster1	multicellular organism development	12	36	86	254	0.98	0.598	E9Q5F9 O08784 O35625 Q0VBL3 Q62433 Q6P1G2 Q8BKG3 Q8K0F1 Q8K2T8 Q8K4E0 Q924A2 Q9R0L6	GO_BP
Cluster1	multicellular organism reproduction	2	36	7	254	2.02	0.26	Q6P1G2 Q8K4E0	GO_BP
Cluster1	multicellular organismal process	14	36	99	254	1	0.574	E9Q5F9 O08784 O35625 P09103 Q0VBL3 Q62433 Q6P1G2 Q8BKG3 Q8K0F1 Q8K2T8 Q8K4E0 Q924A2 Q9R0L6 Q9Z0U1	GO_BP
Cluster1	multicellular organismal reproductive process	2	36	7	254	2.02	0.26	Q6P1G2 Q8K4E0	GO_BP
Cluster1	muscle cell development	1	36	3	254	2.35	0.369	O35625	GO_BP
Cluster1	muscle cell differentiation	1	36	6	254	1.18	0.604	O35625	GO_BP
Cluster1	muscle structure development	1	36	9	254	0.78	0.753	O35625	GO_BP
Cluster1	myelin maintenance	1	36	1	254	7.06	0.142	Q62433	GO_BP
Cluster1	myelination	1	36	4	254	1.76	0.46	Q62433	GO_BP
Cluster1	myelination in peripheral nervous system	1	36	2	254	3.53	0.264	Q62433	GO_BP
Cluster1	myeloid leukocyte activation	3	36	9	254	2.35	0.12	Q62433 Q8R1Q8 Q99MN1	GO_BP
Cluster1	myeloid leukocyte mediated immunity	1	36	6	254	1.18	0.604	Q8R1Q8	GO_BP
Cluster1	ncRNA metabolic process	3	36	14	254	1.51	0.317	O08784 Q99MN1 Q9CR57	GO_BP
Cluster1	ncRNA processing	2	36	11	254	1.28	0.479	Q99MN1 Q9CR57	GO_BP
Cluster1	ncRNA transcription	1	36	3	254	2.35	0.369	O08784	GO_BP
Cluster1	necroptotic process	1	36	1	254	7.06	0.142	Q8K1M6	GO_BP
Cluster1	necrotic cell death	1	36	1	254	7.06	0.142	Q8K1M6	GO_BP
Cluster1	negative regulation of apoptotic process	4	36	21	254	1.34	0.345	Q6P1G2 Q6P5F6 Q8BTW9 Q8K4E0	GO_BP
Cluster1	negative regulation of B cell apoptotic process	1	36	2	254	3.53	0.264	Q6P5F6	GO_BP
Cluster1	negative regulation of biological process	15	36	112	254	0.94	0.689	O35625 P09528 P62751 Q0VBL3 Q62433 Q6P1G2 Q6P5F6 Q8BKI2 Q8BTW9 Q8K2T8 Q8K4E0 Q924A2 Q99MN1 Q9R0L6 Q9Z0U1	GO_BP
Cluster1	negative regulation of biosynthetic process	5	36	42	254	0.84	0.752	O35625 Q0VBL3 Q6P1G2 Q8K2T8 Q924A2	GO_BP
Cluster1	negative regulation of bone development	1	36	1	254	7.06	0.142	Q9Z0U1	GO_BP
Cluster1	negative regulation of cell communication	1	36	23	254	0.31	0.975	O35625	GO_BP
Cluster1	negative regulation of cell death	5	36	25	254	1.41	0.269	P09528 Q6P1G2 Q6P5F6 Q8BTW9 Q8K4E0	GO_BP
Cluster1	negative regulation of cell development	2	36	9	254	1.57	0.373	Q9R0L6 Q9Z0U1	GO_BP
Cluster1	negative regulation of cell differentiation	5	36	23	254	1.53	0.211	O35625 Q0VBL3 Q8K2T8 Q9R0L6 Q9Z0U1	GO_BP
Cluster1	negative regulation of cellular metabolic process	5	36	64	254	0.55	0.976	O35625 Q0VBL3 Q6P1G2 Q8K2T8 Q924A2	GO_BP
Cluster1	negative regulation of cellular process	13	36	106	254	0.87	0.821	O35625 P09528 Q0VBL3 Q62433 Q6P1G2 Q6P5F6 Q8BTW9 Q8K2T8 Q8K4E0 Q924A2 Q99MN1 Q9R0L6 Q9Z0U1	GO_BP
Cluster1	negative regulation of developmental growth	1	36	2	254	3.53	0.264	Q8K4E0	GO_BP
Cluster1	negative regulation of developmental process	6	36	27	254	1.57	0.163	O35625 Q0VBL3 Q8K2T8 Q8K4E0 Q9R0L6 Q9Z0U1	GO_BP
Cluster1	negative regulation of fat cell differentiation	1	36	3	254	2.35	0.369	O35625	GO_BP
Cluster1	negative regulation of fibroblast proliferation	1	36	2	254	3.53	0.264	P09528	GO_BP
Cluster1	negative regulation of gene expression	7	36	49	254	1.01	0.567	O35625 P62751 Q0VBL3 Q6P1G2 Q8BKI2 Q8K2T8 Q924A2	GO_BP
Cluster1	negative regulation of growth	1	36	6	254	1.18	0.604	Q8K4E0	GO_BP
Cluster1	negative regulation of hemopoiesis	3	36	6	254	3.53	0.0388	Q0VBL3 Q8K2T8 Q9Z0U1	GO_BP
Cluster1	negative regulation of immune system process	3	36	9	254	2.35	0.12	Q0VBL3 Q8K2T8 Q9Z0U1	GO_BP
Cluster1	negative regulation of leukocyte apoptotic process	1	36	3	254	2.35	0.369	Q6P5F6	GO_BP
Cluster1	negative regulation of leukocyte differentiation	1	36	3	254	2.35	0.369	Q9Z0U1	GO_BP
Cluster1	negative regulation of metabolic process	7	36	68	254	0.73	0.902	O35625 P62751 Q0VBL3 Q6P1G2 Q8BKI2 Q8K2T8 Q924A2	GO_BP
Cluster1	negative regulation of necrotic cell death	1	36	2	254	3.53	0.264	P09528	GO_BP
Cluster1	negative regulation of nervous system development	1	36	7	254	1.01	0.662	Q9R0L6	GO_BP
Cluster1	negative regulation of neurogenesis	1	36	7	254	1.01	0.662	Q9R0L6	GO_BP
Cluster1	negative regulation of neuron apoptotic process	1	36	2	254	3.53	0.264	Q6P1G2	GO_BP
Cluster1	negative regulation of neuron death	1	36	3	254	2.35	0.369	Q6P1G2	GO_BP
Cluster1	negative regulation of osteoclast development	1	36	1	254	7.06	0.142	Q9Z0U1	GO_BP
Cluster1	negative regulation of osteoclast differentiation	1	36	1	254	7.06	0.142	Q9Z0U1	GO_BP
Cluster1	negative regulation of programmed cell death	4	36	21	254	1.34	0.345	Q6P1G2 Q6P5F6 Q8BTW9 Q8K4E0	GO_BP
Cluster1	negative regulation of protein metabolic process	1	36	26	254	0.27	0.985	O35625	GO_BP
Cluster1	negative regulation of response to stimulus	1	36	26	254	0.27	0.985	O35625	GO_BP
Cluster1	negative regulation of RNA biosynthetic process	5	36	39	254	0.9	0.684	O35625 Q0VBL3 Q6P1G2 Q8K2T8 Q924A2	GO_BP
Cluster1	negative regulation of RNA metabolic process	5	36	41	254	0.86	0.731	O35625 Q0VBL3 Q6P1G2 Q8K2T8 Q924A2	GO_BP
Cluster1	negative regulation of signal transduction	1	36	22	254	0.32	0.97	O35625	GO_BP
Cluster1	negative regulation of signaling	1	36	23	254	0.31	0.975	O35625	GO_BP
Cluster1	negative regulation of Wnt signaling pathway	1	36	3	254	2.35	0.369	O35625	GO_BP
Cluster1	nervous system development	9	36	47	254	1.35	0.194	E9Q5F9 O35625 Q62433 Q6P1G2 Q8BKG3 Q8K0F1 Q8K4E0 Q924A2 Q9R0L6	GO_BP
Cluster1	nervous system process	3	36	9	254	2.35	0.12	O35625 Q8K4E0 Q924A2	GO_BP
Cluster1	neural crest cell development	1	36	4	254	1.76	0.46	O08784	GO_BP
Cluster1	neural crest cell differentiation	1	36	4	254	1.76	0.46	O08784	GO_BP
Cluster1	neural crest formation	1	36	2	254	3.53	0.264	O08784	GO_BP
Cluster1	neural plate anterior/posterior regionalization	1	36	1	254	7.06	0.142	O35625	GO_BP
Cluster1	neural plate pattern specification	1	36	1	254	7.06	0.142	O35625	GO_BP
Cluster1	neural plate regionalization	1	36	1	254	7.06	0.142	O35625	GO_BP
Cluster1	neural precursor cell proliferation	1	36	6	254	1.18	0.604	Q9R0L6	GO_BP
Cluster1	neural tube closure	3	36	7	254	3.02	0.0613	E9Q5F9 Q6P1G2 Q8BKG3	GO_BP
Cluster1	neural tube development	3	36	8	254	2.65	0.0886	E9Q5F9 Q6P1G2 Q8BKG3	GO_BP
Cluster1	neural tube formation	3	36	8	254	2.65	0.0886	E9Q5F9 Q6P1G2 Q8BKG3	GO_BP
Cluster1	neural tube patterning	1	36	1	254	7.06	0.142	Q6P1G2	GO_BP
Cluster1	neurogenesis	6	36	38	254	1.11	0.46	O35625 Q62433 Q8BKG3 Q8K0F1 Q8K4E0 Q9R0L6	GO_BP
Cluster1	neuron development	2	36	19	254	0.74	0.785	Q8K0F1 Q8K4E0	GO_BP
Cluster1	neuron differentiation	3	36	22	254	0.96	0.631	O35625 Q8K0F1 Q8K4E0	GO_BP
Cluster1	neuron fate commitment	1	36	1	254	7.06	0.142	O35625	GO_BP
Cluster1	neuron migration	1	36	3	254	2.35	0.369	Q9R0L6	GO_BP
Cluster1	neuron projection development	2	36	19	254	0.74	0.785	Q8K0F1 Q8K4E0	GO_BP
Cluster1	neuronal stem cell population maintenance	1	36	2	254	3.53	0.264	Q9R0L6	GO_BP
Cluster1	neutrophil activation	1	36	5	254	1.41	0.537	Q8R1Q8	GO_BP
Cluster1	neutrophil activation involved in immune response	1	36	5	254	1.41	0.537	Q8R1Q8	GO_BP
Cluster1	neutrophil degranulation	1	36	5	254	1.41	0.537	Q8R1Q8	GO_BP
Cluster1	neutrophil mediated immunity	1	36	6	254	1.18	0.604	Q8R1Q8	GO_BP
Cluster1	nitrogen compound metabolic process	24	36	129	254	1.31	0.0296	A2AR02 E9Q5F9 O08784 O35625 P09103 P33611 P49717 P57776 P62751 Q0VBL3 Q52KI8 Q61083 Q6NV83 Q6P1G2 Q8BTW9 Q8BWJ3 Q8K2T8 Q8N7N5 Q8R0F5 Q99MN1 Q99PL5 Q9CR57 Q9R1C7 Q9Z0U1	GO_BP
Cluster1	nitrogen compound transport	4	36	25	254	1.13	0.486	P33611 P62751 Q52KI8 Q8R0F5	GO_BP
Cluster1	non-canonical Wnt signaling pathway	2	36	4	254	3.53	0.0975	Q8BKG3 Q8BKI2	GO_BP
Cluster1	non-motile cilium assembly	1	36	1	254	7.06	0.142	Q9R0L6	GO_BP
Cluster1	nose development	1	36	1	254	7.06	0.142	O35625	GO_BP
Cluster1	Notch signaling pathway	1	36	2	254	3.53	0.264	Q0VBL3	GO_BP
Cluster1	nuclear DNA replication	1	36	2	254	3.53	0.264	P33611	GO_BP
Cluster1	nuclear export	2	36	8	254	1.76	0.317	Q52KI8 Q8R0F5	GO_BP
Cluster1	nuclear migration	1	36	4	254	1.76	0.46	Q9R0L6	GO_BP
Cluster1	nuclear transport	4	36	10	254	2.82	0.0383	O35625 P33611 Q52KI8 Q8R0F5	GO_BP
Cluster1	nuclear-transcribed mRNA catabolic process	1	36	5	254	1.41	0.537	P62751	GO_BP
Cluster1	nucleic acid metabolic process	15	36	69	254	1.53	0.0311	A2AR02 E9Q5F9 O08784 P33611 P49717 P57776 P62751 Q0VBL3 Q52KI8 Q6NV83 Q8K2T8 Q8R0F5 Q99MN1 Q9CR57 Q9R1C7	GO_BP
Cluster1	nucleic acid transport	2	36	8	254	1.76	0.317	Q52KI8 Q8R0F5	GO_BP
Cluster1	nucleic acid-templated transcription	4	36	26	254	1.09	0.52	E9Q5F9 O08784 P57776 Q8K2T8	GO_BP
Cluster1	nucleobase-containing compound catabolic process	1	36	6	254	1.18	0.604	P62751	GO_BP
Cluster1	nucleobase-containing compound metabolic process	17	36	76	254	1.58	0.0141	A2AR02 E9Q5F9 O08784 O35625 P33611 P49717 P57776 P62751 Q0VBL3 Q52KI8 Q6NV83 Q8K2T8 Q8R0F5 Q99MN1 Q9CR57 Q9R1C7 Q9Z0U1	GO_BP
Cluster1	nucleobase-containing compound transport	2	36	8	254	1.76	0.317	Q52KI8 Q8R0F5	GO_BP
Cluster1	nucleocytoplasmic transport	4	36	10	254	2.82	0.0383	O35625 P33611 Q52KI8 Q8R0F5	GO_BP
Cluster1	nucleoside diphosphate metabolic process	1	36	2	254	3.53	0.264	Q9Z0U1	GO_BP
Cluster1	nucleoside metabolic process	1	36	4	254	1.76	0.46	Q9Z0U1	GO_BP
Cluster1	nucleoside monophosphate metabolic process	1	36	2	254	3.53	0.264	Q9Z0U1	GO_BP
Cluster1	nucleoside monophosphate phosphorylation	1	36	2	254	3.53	0.264	Q9Z0U1	GO_BP
Cluster1	nucleoside phosphate biosynthetic process	2	36	6	254	2.35	0.203	Q99MN1 Q9Z0U1	GO_BP
Cluster1	nucleoside phosphate metabolic process	2	36	6	254	2.35	0.203	Q99MN1 Q9Z0U1	GO_BP
Cluster1	nucleosome organization	2	36	3	254	4.7	0.0535	E9Q5F9 Q8K2T8	GO_BP
Cluster1	nucleosome positioning	1	36	1	254	7.06	0.142	Q8K2T8	GO_BP
Cluster1	nucleotide biosynthetic process	2	36	6	254	2.35	0.203	Q99MN1 Q9Z0U1	GO_BP
Cluster1	nucleotide metabolic process	2	36	6	254	2.35	0.203	Q99MN1 Q9Z0U1	GO_BP
Cluster1	nucleus localization	1	36	4	254	1.76	0.46	Q9R0L6	GO_BP
Cluster1	olfactory placode development	1	36	1	254	7.06	0.142	O35625	GO_BP
Cluster1	olfactory placode formation	1	36	1	254	7.06	0.142	O35625	GO_BP
Cluster1	olfactory placode morphogenesis	1	36	1	254	7.06	0.142	O35625	GO_BP
Cluster1	optic placode formation	1	36	2	254	3.53	0.264	O35625	GO_BP
Cluster1	organelle assembly	3	36	13	254	1.63	0.275	P62751 Q8K4E0 Q9R0L6	GO_BP
Cluster1	organelle fission	1	36	6	254	1.18	0.604	Q8K1M6	GO_BP
Cluster1	organelle localization	3	36	16	254	1.32	0.402	Q8K1M6 Q8K4E0 Q9R0L6	GO_BP
Cluster1	organelle localization by membrane tethering	2	36	5	254	2.82	0.148	Q8K4E0 Q9R0L6	GO_BP
Cluster1	organelle organization	14	36	73	254	1.35	0.107	E9Q5F9 O35625 P33611 P49717 P62751 Q6P1G2 Q8BKG3 Q8BTW9 Q8K1M6 Q8K2T8 Q8K4E0 Q8R1Q8 Q9R0L6 Q9R1C7	GO_BP
Cluster1	organic acid metabolic process	2	36	9	254	1.57	0.373	P09103 Q99MN1	GO_BP
Cluster1	organic cyclic compound biosynthetic process	7	36	37	254	1.33	0.253	E9Q5F9 O08784 P33611 P57776 Q8K2T8 Q99MN1 Q9Z0U1	GO_BP
Cluster1	organic cyclic compound catabolic process	1	36	6	254	1.18	0.604	P62751	GO_BP
Cluster1	organic cyclic compound metabolic process	17	36	77	254	1.56	0.0163	A2AR02 E9Q5F9 O08784 O35625 P33611 P49717 P57776 P62751 Q0VBL3 Q52KI8 Q6NV83 Q8K2T8 Q8R0F5 Q99MN1 Q9CR57 Q9R1C7 Q9Z0U1	GO_BP
Cluster1	organic substance biosynthetic process	11	36	50	254	1.55	0.0655	E9Q5F9 O08784 P33611 P49717 P57776 P62751 Q8K2T8 Q99MN1 Q99PL5 Q9CR57 Q9Z0U1	GO_BP
Cluster1	organic substance catabolic process	2	36	15	254	0.94	0.657	O35625 P62751	GO_BP
Cluster1	organic substance metabolic process	25	36	134	254	1.32	0.0226	A2AR02 E9Q5F9 O08784 O35625 P09103 P33611 P49717 P57776 P62751 Q0VBL3 Q52KI8 Q61083 Q6NV83 Q6P1G2 Q8BTW9 Q8BWJ3 Q8K2T8 Q8K4E0 Q8N7N5 Q8R0F5 Q99MN1 Q99PL5 Q9CR57 Q9R1C7 Q9Z0U1	GO_BP
Cluster1	organic substance transport	4	36	27	254	1.05	0.553	P33611 P62751 Q52KI8 Q8R0F5	GO_BP
Cluster1	organonitrogen compound biosynthetic process	4	36	12	254	2.35	0.073	P62751 Q99MN1 Q99PL5 Q9CR57	GO_BP
Cluster1	organonitrogen compound catabolic process	1	36	8	254	0.88	0.711	O35625	GO_BP
Cluster1	organonitrogen compound metabolic process	15	36	77	254	1.37	0.0823	A2AR02 E9Q5F9 O35625 P09103 P62751 Q61083 Q6P1G2 Q8BTW9 Q8BWJ3 Q8K2T8 Q8N7N5 Q99MN1 Q99PL5 Q9CR57 Q9Z0U1	GO_BP
Cluster1	organophosphate biosynthetic process	2	36	10	254	1.41	0.427	Q99MN1 Q9Z0U1	GO_BP
Cluster1	organophosphate metabolic process	2	36	10	254	1.41	0.427	Q99MN1 Q9Z0U1	GO_BP
Cluster1	ovulation	1	36	2	254	3.53	0.264	Q8K4E0	GO_BP
Cluster1	oxidation-reduction process	1	36	8	254	0.88	0.711	P09103	GO_BP
Cluster1	oxoacid metabolic process	2	36	9	254	1.57	0.373	P09103 Q99MN1	GO_BP
Cluster1	pattern specification process	2	36	4	254	3.53	0.0975	O35625 Q6P1G2	GO_BP
Cluster1	peptide biosynthetic process	4	36	7	254	4.03	0.00881	P62751 Q99MN1 Q99PL5 Q9CR57	GO_BP
Cluster1	peptide metabolic process	4	36	7	254	4.03	0.00881	P62751 Q99MN1 Q99PL5 Q9CR57	GO_BP
Cluster1	peptide transport	4	36	24	254	1.18	0.452	P33611 P62751 Q52KI8 Q8R0F5	GO_BP
Cluster1	peptidyl-amino acid modification	3	36	20	254	1.06	0.561	A2AR02 E9Q5F9 P09103	GO_BP
Cluster1	peptidyl-lysine dimethylation	1	36	1	254	7.06	0.142	E9Q5F9	GO_BP
Cluster1	peptidyl-lysine methylation	1	36	1	254	7.06	0.142	E9Q5F9	GO_BP
Cluster1	peptidyl-lysine modification	1	36	8	254	0.88	0.711	E9Q5F9	GO_BP
Cluster1	peptidyl-lysine monomethylation	1	36	1	254	7.06	0.142	E9Q5F9	GO_BP
Cluster1	peptidyl-lysine trimethylation	1	36	1	254	7.06	0.142	E9Q5F9	GO_BP
Cluster1	peptidyl-proline hydroxylation	1	36	1	254	7.06	0.142	P09103	GO_BP
Cluster1	peptidyl-proline modification	2	36	2	254	7.06	0.0196	A2AR02 P09103	GO_BP
Cluster1	pericardium development	1	36	1	254	7.06	0.142	E9Q5F9	GO_BP
Cluster1	peripheral nervous system axon ensheathment	1	36	2	254	3.53	0.264	Q62433	GO_BP
Cluster1	peripheral nervous system development	1	36	3	254	2.35	0.369	Q62433	GO_BP
Cluster1	peripheral nervous system myelin maintenance	1	36	1	254	7.06	0.142	Q62433	GO_BP
Cluster1	peroxisome fission	1	36	1	254	7.06	0.142	Q8K1M6	GO_BP
Cluster1	peroxisome organization	1	36	1	254	7.06	0.142	Q8K1M6	GO_BP
Cluster1	phosphate-containing compound metabolic process	6	36	31	254	1.37	0.261	O35625 Q61083 Q8BTW9 Q8BWJ3 Q99MN1 Q9Z0U1	GO_BP
Cluster1	phosphorus metabolic process	6	36	32	254	1.32	0.289	O35625 Q61083 Q8BTW9 Q8BWJ3 Q99MN1 Q9Z0U1	GO_BP
Cluster1	phosphorylation	6	36	27	254	1.57	0.163	O35625 Q61083 Q8BTW9 Q8BWJ3 Q99MN1 Q9Z0U1	GO_BP
Cluster1	photoreceptor cell development	1	36	1	254	7.06	0.142	Q8K4E0	GO_BP
Cluster1	photoreceptor cell differentiation	1	36	1	254	7.06	0.142	Q8K4E0	GO_BP
Cluster1	placenta blood vessel development	1	36	3	254	2.35	0.369	Q0VBL3	GO_BP
Cluster1	placenta development	2	36	10	254	1.41	0.427	E9Q5F9 Q0VBL3	GO_BP
Cluster1	plasma lipoprotein particle assembly	1	36	1	254	7.06	0.142	P09103	GO_BP
Cluster1	plasma lipoprotein particle organization	1	36	1	254	7.06	0.142	P09103	GO_BP
Cluster1	plasma membrane bounded cell projection assembly	2	36	8	254	1.76	0.317	Q8K4E0 Q9R0L6	GO_BP
Cluster1	plasma membrane organization	1	36	2	254	3.53	0.264	Q62433	GO_BP
Cluster1	polarized epithelial cell differentiation	1	36	2	254	3.53	0.264	Q8BKG3	GO_BP
Cluster1	positive regulation of angiogenesis	1	36	4	254	1.76	0.46	Q8BTW9	GO_BP
Cluster1	positive regulation of apoptotic process	1	36	18	254	0.39	0.942	Q8K1M6	GO_BP
Cluster1	positive regulation of apoptotic signaling pathway	1	36	6	254	1.18	0.604	Q8K1M6	GO_BP
Cluster1	positive regulation of B cell activation	1	36	3	254	2.35	0.369	Q6P5F6	GO_BP
Cluster1	positive regulation of B cell proliferation	1	36	2	254	3.53	0.264	Q6P5F6	GO_BP
Cluster1	positive regulation of biological process	16	36	121	254	0.93	0.723	E9Q5F9 O35625 P09103 Q0VBL3 Q61083 Q6P1G2 Q6P5F6 Q8BKG3 Q8BKI2 Q8BTW9 Q8K0F1 Q8K1M6 Q8K2T8 Q8R1Q8 Q99MN1 Q9R0L6	GO_BP
Cluster1	positive regulation of biosynthetic process	5	36	52	254	0.68	0.904	O35625 Q0VBL3 Q61083 Q8K2T8 Q99MN1	GO_BP
Cluster1	positive regulation of catabolic process	2	36	9	254	1.57	0.373	O35625 Q8BKI2	GO_BP
Cluster1	positive regulation of catalytic activity	6	36	43	254	0.98	0.598	O35625 Q61083 Q6P5F6 Q8BTW9 Q8K1M6 Q99MN1	GO_BP
Cluster1	positive regulation of cell activation	2	36	8	254	1.76	0.317	Q6P5F6 Q99MN1	GO_BP
Cluster1	positive regulation of cell communication	5	36	35	254	1.01	0.577	O35625 Q61083 Q6P5F6 Q8K1M6 Q99MN1	GO_BP
Cluster1	positive regulation of cell cycle	2	36	15	254	0.94	0.657	Q8K2T8 Q8R1Q8	GO_BP
Cluster1	positive regulation of cell cycle checkpoint	1	36	1	254	7.06	0.142	Q8R1Q8	GO_BP
Cluster1	positive regulation of cell cycle phase transition	1	36	3	254	2.35	0.369	Q8K2T8	GO_BP
Cluster1	positive regulation of cell cycle process	2	36	10	254	1.41	0.427	Q8K2T8 Q8R1Q8	GO_BP
Cluster1	positive regulation of cell death	1	36	19	254	0.37	0.951	Q8K1M6	GO_BP
Cluster1	positive regulation of cell development	1	36	11	254	0.64	0.821	Q8BKG3	GO_BP
Cluster1	positive regulation of cell differentiation	1	36	20	254	0.35	0.959	Q8BKG3	GO_BP
Cluster1	positive regulation of cell growth	1	36	6	254	1.18	0.604	Q6P1G2	GO_BP
Cluster1	positive regulation of cell migration	1	36	14	254	0.5	0.889	Q99MN1	GO_BP
Cluster1	positive regulation of cell motility	1	36	14	254	0.5	0.889	Q99MN1	GO_BP
Cluster1	positive regulation of cellular catabolic process	2	36	9	254	1.57	0.373	O35625 Q8BKI2	GO_BP
Cluster1	positive regulation of cellular component movement	1	36	14	254	0.5	0.889	Q99MN1	GO_BP
Cluster1	positive regulation of cellular metabolic process	8	36	78	254	0.72	0.92	O35625 Q0VBL3 Q61083 Q6P5F6 Q8BKI2 Q8BTW9 Q8K2T8 Q99MN1	GO_BP
Cluster1	positive regulation of cellular process	12	36	111	254	0.76	0.939	O35625 Q0VBL3 Q61083 Q6P1G2 Q6P5F6 Q8BKG3 Q8BKI2 Q8BTW9 Q8K1M6 Q8K2T8 Q8R1Q8 Q99MN1	GO_BP
Cluster1	positive regulation of chemotaxis	1	36	3	254	2.35	0.369	Q99MN1	GO_BP
Cluster1	positive regulation of chromatin organization	1	36	4	254	1.76	0.46	Q8K2T8	GO_BP
Cluster1	positive regulation of chromosome organization	1	36	7	254	1.01	0.662	Q8K2T8	GO_BP
Cluster1	positive regulation of cytokine production	3	36	7	254	3.02	0.0613	E9Q5F9 Q8K0F1 Q99MN1	GO_BP
Cluster1	positive regulation of cytokine secretion	1	36	3	254	2.35	0.369	Q99MN1	GO_BP
Cluster1	positive regulation of defense response	1	36	6	254	1.18	0.604	Q99MN1	GO_BP
Cluster1	positive regulation of dephosphorylation	1	36	1	254	7.06	0.142	Q6P5F6	GO_BP
Cluster1	positive regulation of developmental process	4	36	33	254	0.86	0.725	Q6P1G2 Q8BKG3 Q8BTW9 Q8K1M6	GO_BP
Cluster1	positive regulation of ERK1 and ERK2 cascade	1	36	6	254	1.18	0.604	Q99MN1	GO_BP
Cluster1	positive regulation of gene expression	5	36	55	254	0.64	0.931	O35625 Q0VBL3 Q61083 Q8K2T8 Q99MN1	GO_BP
Cluster1	positive regulation of growth	1	36	8	254	0.88	0.711	Q6P1G2	GO_BP
Cluster1	positive regulation of GTPase activity	2	36	20	254	0.71	0.809	O35625 Q8K1M6	GO_BP
Cluster1	positive regulation of histone methylation	1	36	3	254	2.35	0.369	Q8K2T8	GO_BP
Cluster1	positive regulation of histone modification	1	36	4	254	1.76	0.46	Q8K2T8	GO_BP
Cluster1	positive regulation of hydrolase activity	4	36	30	254	0.94	0.645	O35625 Q6P5F6 Q8K1M6 Q99MN1	GO_BP
Cluster1	positive regulation of immune effector process	1	36	4	254	1.76	0.46	Q99MN1	GO_BP
Cluster1	positive regulation of immune response	2	36	11	254	1.28	0.479	Q6P5F6 Q99MN1	GO_BP
Cluster1	positive regulation of immune system process	2	36	17	254	0.83	0.727	Q6P5F6 Q99MN1	GO_BP
Cluster1	positive regulation of inflammatory response	1	36	3	254	2.35	0.369	Q99MN1	GO_BP
Cluster1	positive regulation of interferon-alpha production	1	36	2	254	3.53	0.264	E9Q5F9	GO_BP
Cluster1	positive regulation of interleukin-6 production	1	36	3	254	2.35	0.369	Q8K0F1	GO_BP
Cluster1	positive regulation of intracellular transport	1	36	7	254	1.01	0.662	Q9R0L6	GO_BP
Cluster1	positive regulation of JNK cascade	2	36	5	254	2.82	0.148	O35625 Q61083	GO_BP
Cluster1	positive regulation of JUN kinase activity	2	36	4	254	3.53	0.0975	O35625 Q61083	GO_BP
Cluster1	positive regulation of kinase activity	4	36	15	254	1.88	0.147	O35625 Q61083 Q8BTW9 Q99MN1	GO_BP
Cluster1	positive regulation of leukocyte activation	2	36	8	254	1.76	0.317	Q6P5F6 Q99MN1	GO_BP
Cluster1	positive regulation of leukocyte chemotaxis	1	36	3	254	2.35	0.369	Q99MN1	GO_BP
Cluster1	positive regulation of leukocyte migration	1	36	3	254	2.35	0.369	Q99MN1	GO_BP
Cluster1	positive regulation of leukocyte proliferation	1	36	3	254	2.35	0.369	Q6P5F6	GO_BP
Cluster1	positive regulation of locomotion	1	36	14	254	0.5	0.889	Q99MN1	GO_BP
Cluster1	positive regulation of lymphocyte activation	1	36	7	254	1.01	0.662	Q6P5F6	GO_BP
Cluster1	positive regulation of lymphocyte proliferation	1	36	3	254	2.35	0.369	Q6P5F6	GO_BP
Cluster1	positive regulation of macrophage activation	1	36	1	254	7.06	0.142	Q99MN1	GO_BP
Cluster1	positive regulation of macrophage chemotaxis	1	36	2	254	3.53	0.264	Q99MN1	GO_BP
Cluster1	positive regulation of macrophage migration	1	36	2	254	3.53	0.264	Q99MN1	GO_BP
Cluster1	positive regulation of MAP kinase activity	3	36	10	254	2.12	0.155	O35625 Q61083 Q99MN1	GO_BP
Cluster1	positive regulation of MAPK cascade	3	36	16	254	1.32	0.402	O35625 Q61083 Q99MN1	GO_BP
Cluster1	positive regulation of metabolic process	8	36	84	254	0.67	0.958	O35625 Q0VBL3 Q61083 Q6P5F6 Q8BKI2 Q8BTW9 Q8K2T8 Q99MN1	GO_BP
Cluster1	positive regulation of metallopeptidase activity	1	36	3	254	2.35	0.369	Q99MN1	GO_BP
Cluster1	positive regulation of mitochondrial fission	1	36	1	254	7.06	0.142	Q8K1M6	GO_BP
Cluster1	positive regulation of mitochondrion organization	1	36	2	254	3.53	0.264	Q8K1M6	GO_BP
Cluster1	positive regulation of mitotic cell cycle	1	36	7	254	1.01	0.662	Q8R1Q8	GO_BP
Cluster1	positive regulation of molecular function	6	36	50	254	0.85	0.758	O35625 Q61083 Q6P5F6 Q8BTW9 Q8K1M6 Q99MN1	GO_BP
Cluster1	positive regulation of mRNA 3'-end processing	1	36	3	254	2.35	0.369	Q8K2T8	GO_BP
Cluster1	positive regulation of mRNA catabolic process	1	36	2	254	3.53	0.264	Q8BKI2	GO_BP
Cluster1	positive regulation of mRNA metabolic process	2	36	7	254	2.02	0.26	Q8BKI2 Q8K2T8	GO_BP
Cluster1	positive regulation of mRNA processing	1	36	5	254	1.41	0.537	Q8K2T8	GO_BP
Cluster1	positive regulation of multi-organism process	1	36	8	254	0.88	0.711	P09103	GO_BP
Cluster1	positive regulation of nervous system development	1	36	9	254	0.78	0.753	Q8BKG3	GO_BP
Cluster1	positive regulation of neurogenesis	1	36	8	254	0.88	0.711	Q8BKG3	GO_BP
Cluster1	positive regulation of neuron differentiation	1	36	7	254	1.01	0.662	Q8BKG3	GO_BP
Cluster1	positive regulation of organelle organization	2	36	20	254	0.71	0.809	Q8K1M6 Q8K2T8	GO_BP
Cluster1	positive regulation of p38MAPK cascade	1	36	3	254	2.35	0.369	Q99MN1	GO_BP
Cluster1	positive regulation of peptidase activity	1	36	6	254	1.18	0.604	Q99MN1	GO_BP
Cluster1	positive regulation of peptide secretion	2	36	6	254	2.35	0.203	Q8K1M6 Q99MN1	GO_BP
Cluster1	positive regulation of phosphatase activity	1	36	1	254	7.06	0.142	Q6P5F6	GO_BP
Cluster1	positive regulation of phosphate metabolic process	5	36	22	254	1.6	0.184	O35625 Q61083 Q6P5F6 Q8BTW9 Q99MN1	GO_BP
Cluster1	positive regulation of phosphorylation	4	36	21	254	1.34	0.345	O35625 Q61083 Q8BTW9 Q99MN1	GO_BP
Cluster1	positive regulation of programmed cell death	1	36	18	254	0.39	0.942	Q8K1M6	GO_BP
Cluster1	positive regulation of protein catabolic process	1	36	4	254	1.76	0.46	O35625	GO_BP
Cluster1	positive regulation of protein dephosphorylation	1	36	1	254	7.06	0.142	Q6P5F6	GO_BP
Cluster1	positive regulation of protein kinase activity	4	36	13	254	2.17	0.0948	O35625 Q61083 Q8BTW9 Q99MN1	GO_BP
Cluster1	positive regulation of protein metabolic process	6	36	34	254	1.25	0.345	O35625 Q61083 Q6P5F6 Q8BTW9 Q8K2T8 Q99MN1	GO_BP
Cluster1	positive regulation of protein phosphorylation	4	36	20	254	1.41	0.309	O35625 Q61083 Q8BTW9 Q99MN1	GO_BP
Cluster1	positive regulation of protein secretion	2	36	6	254	2.35	0.203	Q8K1M6 Q99MN1	GO_BP
Cluster1	positive regulation of protein transport	3	36	11	254	1.92	0.193	Q8K1M6 Q99MN1 Q9R0L6	GO_BP
Cluster1	positive regulation of protein ubiquitination	1	36	3	254	2.35	0.369	O35625	GO_BP
Cluster1	positive regulation of proteolysis	2	36	10	254	1.41	0.427	O35625 Q99MN1	GO_BP
Cluster1	positive regulation of response to stimulus	5	36	41	254	0.86	0.731	O35625 Q61083 Q6P5F6 Q8K1M6 Q99MN1	GO_BP
Cluster1	positive regulation of RNA biosynthetic process	5	36	46	254	0.77	0.826	O35625 Q0VBL3 Q61083 Q8K2T8 Q99MN1	GO_BP
Cluster1	positive regulation of RNA metabolic process	6	36	52	254	0.81	0.795	O35625 Q0VBL3 Q61083 Q8BKI2 Q8K2T8 Q99MN1	GO_BP
Cluster1	positive regulation of secretion	2	36	9	254	1.57	0.373	Q8K1M6 Q99MN1	GO_BP
Cluster1	positive regulation of secretion by cell	2	36	9	254	1.57	0.373	Q8K1M6 Q99MN1	GO_BP
Cluster1	positive regulation of signal transduction	5	36	34	254	1.04	0.548	O35625 Q61083 Q6P5F6 Q8K1M6 Q99MN1	GO_BP
Cluster1	positive regulation of signaling	5	36	36	254	0.98	0.606	O35625 Q61083 Q6P5F6 Q8K1M6 Q99MN1	GO_BP
Cluster1	positive regulation of spindle checkpoint	1	36	1	254	7.06	0.142	Q8R1Q8	GO_BP
Cluster1	positive regulation of transferase activity	4	36	17	254	1.66	0.207	O35625 Q61083 Q8BTW9 Q99MN1	GO_BP
Cluster1	positive regulation of transport	3	36	20	254	1.06	0.561	Q8K1M6 Q99MN1 Q9R0L6	GO_BP
Cluster1	positive regulation of vasculature development	1	36	4	254	1.76	0.46	Q8BTW9	GO_BP
Cluster1	positive regulation of viral entry into host cell	1	36	1	254	7.06	0.142	P09103	GO_BP
Cluster1	positive regulation of viral life cycle	1	36	3	254	2.35	0.369	P09103	GO_BP
Cluster1	positive regulation of viral process	1	36	6	254	1.18	0.604	P09103	GO_BP
Cluster1	positive regulation of Wnt signaling pathway	1	36	3	254	2.35	0.369	O35625	GO_BP
Cluster1	post-anal tail morphogenesis	1	36	2	254	3.53	0.264	O35625	GO_BP
Cluster1	post-transcriptional gene silencing by RNA	1	36	5	254	1.41	0.537	Q8BKI2	GO_BP
Cluster1	post-translational protein modification	2	36	7	254	2.02	0.26	P09103 Q8N7N5	GO_BP
Cluster1	posttranscriptional gene silencing	1	36	6	254	1.18	0.604	Q8BKI2	GO_BP
Cluster1	posttranscriptional regulation of gene expression	2	36	17	254	0.83	0.727	O08784 Q8BKI2	GO_BP
Cluster1	primary metabolic process	25	36	133	254	1.33	0.02	A2AR02 E9Q5F9 O08784 O35625 P09103 P33611 P49717 P57776 P62751 Q0VBL3 Q52KI8 Q61083 Q6NV83 Q6P1G2 Q8BTW9 Q8BWJ3 Q8K2T8 Q8K4E0 Q8N7N5 Q8R0F5 Q99MN1 Q99PL5 Q9CR57 Q9R1C7 Q9Z0U1	GO_BP
Cluster1	primary neural tube formation	3	36	7	254	3.02	0.0613	E9Q5F9 Q6P1G2 Q8BKG3	GO_BP
Cluster1	programmed cell death	2	36	17	254	0.83	0.727	Q8BTW9 Q8K1M6	GO_BP
Cluster1	programmed necrotic cell death	1	36	1	254	7.06	0.142	Q8K1M6	GO_BP
Cluster1	protein alkylation	1	36	1	254	7.06	0.142	E9Q5F9	GO_BP
Cluster1	protein catabolic process	1	36	7	254	1.01	0.662	O35625	GO_BP
Cluster1	protein complex oligomerization	3	36	7	254	3.02	0.0613	O35625 Q8K1M6 Q8R1Q8	GO_BP
Cluster1	protein dealkylation	1	36	3	254	2.35	0.369	Q6P1G2	GO_BP
Cluster1	protein demethylation	1	36	3	254	2.35	0.369	Q6P1G2	GO_BP
Cluster1	protein export from nucleus	2	36	8	254	1.76	0.317	Q52KI8 Q8R0F5	GO_BP
Cluster1	protein folding	1	36	4	254	1.76	0.46	P09103	GO_BP
Cluster1	protein homooligomerization	3	36	5	254	4.23	0.0215	O35625 Q8K1M6 Q8R1Q8	GO_BP
Cluster1	protein homotetramerization	1	36	2	254	3.53	0.264	Q8K1M6	GO_BP
Cluster1	protein hydroxylation	1	36	2	254	3.53	0.264	P09103	GO_BP
Cluster1	protein import	1	36	2	254	3.53	0.264	P33611	GO_BP
Cluster1	protein import into nucleus	1	36	2	254	3.53	0.264	P33611	GO_BP
Cluster1	protein localization	6	36	40	254	1.06	0.517	P33611 P62751 Q52KI8 Q8K2T8 Q8R0F5 Q9R0L6	GO_BP
Cluster1	protein localization to centrosome	1	36	2	254	3.53	0.264	Q9R0L6	GO_BP
Cluster1	protein localization to cytoskeleton	1	36	2	254	3.53	0.264	Q9R0L6	GO_BP
Cluster1	protein localization to endoplasmic reticulum	1	36	2	254	3.53	0.264	P62751	GO_BP
Cluster1	protein localization to membrane	1	36	8	254	0.88	0.711	P62751	GO_BP
Cluster1	protein localization to microtubule cytoskeleton	1	36	2	254	3.53	0.264	Q9R0L6	GO_BP
Cluster1	protein localization to nucleus	2	36	4	254	3.53	0.0975	P33611 Q8K2T8	GO_BP
Cluster1	protein localization to organelle	4	36	13	254	2.17	0.0948	P33611 P62751 Q8K2T8 Q9R0L6	GO_BP
Cluster1	protein metabolic process	14	36	71	254	1.39	0.0864	A2AR02 E9Q5F9 O35625 P09103 P62751 Q61083 Q6P1G2 Q8BTW9 Q8BWJ3 Q8K2T8 Q8N7N5 Q99MN1 Q99PL5 Q9CR57	GO_BP
Cluster1	protein methylation	1	36	1	254	7.06	0.142	E9Q5F9	GO_BP
Cluster1	protein modification by small protein conjugation	3	36	14	254	1.51	0.317	O35625 Q6P1G2 Q8K2T8	GO_BP
Cluster1	protein modification process	11	36	62	254	1.25	0.233	A2AR02 E9Q5F9 O35625 P09103 Q61083 Q6P1G2 Q8BTW9 Q8BWJ3 Q8K2T8 Q8N7N5 Q99MN1	GO_BP
Cluster1	protein monoubiquitination	2	36	4	254	3.53	0.0975	Q6P1G2 Q8K2T8	GO_BP
Cluster1	protein peptidyl-prolyl isomerization	1	36	1	254	7.06	0.142	A2AR02	GO_BP
Cluster1	protein phosphorylation	5	36	25	254	1.41	0.269	O35625 Q61083 Q8BTW9 Q8BWJ3 Q99MN1	GO_BP
Cluster1	protein polymerization	1	36	2	254	3.53	0.264	Q8K1M6	GO_BP
Cluster1	protein polyubiquitination	1	36	7	254	1.01	0.662	O35625	GO_BP
Cluster1	protein targeting	1	36	2	254	3.53	0.264	P62751	GO_BP
Cluster1	protein targeting to ER	1	36	1	254	7.06	0.142	P62751	GO_BP
Cluster1	protein targeting to membrane	1	36	2	254	3.53	0.264	P62751	GO_BP
Cluster1	protein tetramerization	1	36	2	254	3.53	0.264	Q8K1M6	GO_BP
Cluster1	protein transport	4	36	24	254	1.18	0.452	P33611 P62751 Q52KI8 Q8R0F5	GO_BP
Cluster1	protein ubiquitination	3	36	13	254	1.63	0.275	O35625 Q6P1G2 Q8K2T8	GO_BP
Cluster1	protein-containing complex assembly	5	36	30	254	1.18	0.425	O35625 P09103 P62751 Q8K1M6 Q8R1Q8	GO_BP
Cluster1	protein-containing complex disassembly	1	36	5	254	1.41	0.537	O35625	GO_BP
Cluster1	protein-containing complex localization	3	36	10	254	2.12	0.155	Q52KI8 Q8R0F5 Q9R0L6	GO_BP
Cluster1	protein-containing complex subunit organization	7	36	35	254	1.41	0.206	E9Q5F9 O35625 P09103 P62751 Q8K1M6 Q8K2T8 Q8R1Q8	GO_BP
Cluster1	protein-DNA complex subunit organization	2	36	3	254	4.7	0.0535	E9Q5F9 Q8K2T8	GO_BP
Cluster1	protein-lipid complex assembly	1	36	1	254	7.06	0.142	P09103	GO_BP
Cluster1	protein-lipid complex subunit organization	1	36	1	254	7.06	0.142	P09103	GO_BP
Cluster1	purine nucleoside diphosphate metabolic process	1	36	2	254	3.53	0.264	Q9Z0U1	GO_BP
Cluster1	purine nucleoside metabolic process	1	36	2	254	3.53	0.264	Q9Z0U1	GO_BP
Cluster1	purine nucleoside monophosphate metabolic process	1	36	2	254	3.53	0.264	Q9Z0U1	GO_BP
Cluster1	purine nucleotide metabolic process	1	36	2	254	3.53	0.264	Q9Z0U1	GO_BP
Cluster1	purine ribonucleoside metabolic process	1	36	2	254	3.53	0.264	Q9Z0U1	GO_BP
Cluster1	purine ribonucleotide metabolic process	1	36	2	254	3.53	0.264	Q9Z0U1	GO_BP
Cluster1	purine-containing compound metabolic process	1	36	2	254	3.53	0.264	Q9Z0U1	GO_BP
Cluster1	Ras protein signal transduction	1	36	8	254	0.88	0.711	Q8BTW9	GO_BP
Cluster1	regionalization	2	36	3	254	4.7	0.0535	O35625 Q6P1G2	GO_BP
Cluster1	regulated exocytosis	1	36	8	254	0.88	0.711	Q8R1Q8	GO_BP
Cluster1	regulation of actin cytoskeleton organization	1	36	9	254	0.78	0.753	Q8K4E0	GO_BP
Cluster1	regulation of actin filament bundle assembly	1	36	5	254	1.41	0.537	Q8K4E0	GO_BP
Cluster1	regulation of actin filament organization	1	36	9	254	0.78	0.753	Q8K4E0	GO_BP
Cluster1	regulation of actin filament-based process	1	36	11	254	0.64	0.821	Q8K4E0	GO_BP
Cluster1	regulation of actomyosin structure organization	1	36	5	254	1.41	0.537	Q8K4E0	GO_BP
Cluster1	regulation of anatomical structure morphogenesis	4	36	19	254	1.49	0.274	Q8BKG3 Q8BTW9 Q8K1M6 Q9R1C7	GO_BP
Cluster1	regulation of angiogenesis	1	36	5	254	1.41	0.537	Q8BTW9	GO_BP
Cluster1	regulation of animal organ morphogenesis	1	36	6	254	1.18	0.604	Q8BKG3	GO_BP
Cluster1	regulation of apoptotic process	8	36	41	254	1.38	0.201	P09103 Q61083 Q62433 Q6P1G2 Q6P5F6 Q8BTW9 Q8K1M6 Q8K4E0	GO_BP
Cluster1	regulation of apoptotic signaling pathway	2	36	15	254	0.94	0.657	P09103 Q8K1M6	GO_BP
Cluster1	regulation of autophagy	1	36	6	254	1.18	0.604	Q8K1M6	GO_BP
Cluster1	regulation of autophagy of mitochondrion	1	36	1	254	7.06	0.142	Q8K1M6	GO_BP
Cluster1	regulation of B cell activation	1	36	4	254	1.76	0.46	Q6P5F6	GO_BP
Cluster1	regulation of B cell apoptotic process	1	36	2	254	3.53	0.264	Q6P5F6	GO_BP
Cluster1	regulation of B cell proliferation	1	36	3	254	2.35	0.369	Q6P5F6	GO_BP
Cluster1	regulation of B cell receptor signaling pathway	1	36	1	254	7.06	0.142	Q6P5F6	GO_BP
Cluster1	regulation of biological process	26	36	201	254	0.91	0.904	E9Q5F9 O08784 O35625 P09103 P09528 P57776 P62751 Q0VBL3 Q61083 Q62433 Q6P1G2 Q6P5F6 Q8BKG3 Q8BKI2 Q8BTW9 Q8K0F1 Q8K1M6 Q8K2T8 Q8K4E0 Q8R1Q8 Q924A2 Q99MN1 Q99PL5 Q9R0L6 Q9R1C7 Q9Z0U1	GO_BP
Cluster1	regulation of biological quality	6	36	59	254	0.72	0.892	P09528 P33611 Q6P5F6 Q8K4E0 Q9R1C7 Q9Z0U1	GO_BP
Cluster1	regulation of biosynthetic process	8	36	95	254	0.59	0.989	O08784 O35625 Q0VBL3 Q61083 Q6P1G2 Q8K2T8 Q924A2 Q99MN1	GO_BP
Cluster1	regulation of bone development	1	36	2	254	3.53	0.264	Q9Z0U1	GO_BP
Cluster1	regulation of canonical Wnt signaling pathway	1	36	4	254	1.76	0.46	O35625	GO_BP
Cluster1	regulation of catabolic process	3	36	23	254	0.92	0.664	O35625 Q8BKI2 Q8K1M6	GO_BP
Cluster1	regulation of catalytic activity	6	36	60	254	0.71	0.902	O35625 Q61083 Q6P5F6 Q8BTW9 Q8K1M6 Q99MN1	GO_BP
Cluster1	regulation of cell activation	2	36	12	254	1.18	0.528	Q6P5F6 Q99MN1	GO_BP
Cluster1	regulation of cell communication	7	36	62	254	0.8	0.83	O35625 P09103 Q61083 Q6P5F6 Q8BTW9 Q8K1M6 Q99MN1	GO_BP
Cluster1	regulation of cell cycle	8	36	39	254	1.45	0.162	E9Q5F9 Q61083 Q8BTW9 Q8K2T8 Q8K4E0 Q8R1Q8 Q9R0L6 Q9R1C7	GO_BP
Cluster1	regulation of cell cycle checkpoint	1	36	1	254	7.06	0.142	Q8R1Q8	GO_BP
Cluster1	regulation of cell cycle G1/S phase transition	1	36	5	254	1.41	0.537	Q8K2T8	GO_BP
Cluster1	regulation of cell cycle G2/M phase transition	2	36	5	254	2.82	0.148	Q8K4E0 Q9R0L6	GO_BP
Cluster1	regulation of cell cycle phase transition	4	36	12	254	2.35	0.073	Q8K2T8 Q8K4E0 Q8R1Q8 Q9R0L6	GO_BP
Cluster1	regulation of cell cycle process	6	36	21	254	2.02	0.0577	E9Q5F9 Q8K2T8 Q8K4E0 Q8R1Q8 Q9R0L6 Q9R1C7	GO_BP
Cluster1	regulation of cell death	10	36	45	254	1.57	0.075	P09103 P09528 P57776 Q61083 Q62433 Q6P1G2 Q6P5F6 Q8BTW9 Q8K1M6 Q8K4E0	GO_BP
Cluster1	regulation of cell development	3	36	21	254	1.01	0.597	Q8BKG3 Q9R0L6 Q9Z0U1	GO_BP
Cluster1	regulation of cell differentiation	8	36	47	254	1.2	0.338	O35625 Q0VBL3 Q8BKG3 Q8BKI2 Q8K2T8 Q8K4E0 Q9R0L6 Q9Z0U1	GO_BP
Cluster1	regulation of cell division	2	36	6	254	2.35	0.203	E9Q5F9 Q9R1C7	GO_BP
Cluster1	regulation of cell growth	2	36	13	254	1.09	0.574	Q6P1G2 Q8BTW9	GO_BP
Cluster1	regulation of cell migration	1	36	20	254	0.35	0.959	Q99MN1	GO_BP
Cluster1	regulation of cell morphogenesis	1	36	9	254	0.78	0.753	Q9R1C7	GO_BP
Cluster1	regulation of cell motility	1	36	21	254	0.34	0.965	Q99MN1	GO_BP
Cluster1	regulation of cell population proliferation	5	36	39	254	0.9	0.684	P09528 Q62433 Q6P1G2 Q6P5F6 Q99MN1	GO_BP
Cluster1	regulation of cell projection organization	1	36	14	254	0.5	0.889	Q8BKG3	GO_BP
Cluster1	regulation of cell shape	1	36	4	254	1.76	0.46	Q9R1C7	GO_BP
Cluster1	regulation of cellular amide metabolic process	1	36	12	254	0.59	0.847	O08784	GO_BP
Cluster1	regulation of cellular biosynthetic process	8	36	93	254	0.61	0.986	O08784 O35625 Q0VBL3 Q61083 Q6P1G2 Q8K2T8 Q924A2 Q99MN1	GO_BP
Cluster1	regulation of cellular catabolic process	3	36	23	254	0.92	0.664	O35625 Q8BKI2 Q8K1M6	GO_BP
Cluster1	regulation of cellular component biogenesis	2	36	23	254	0.61	0.87	Q8K1M6 Q8K4E0	GO_BP
Cluster1	regulation of cellular component movement	1	36	22	254	0.32	0.97	Q99MN1	GO_BP
Cluster1	regulation of cellular component organization	8	36	61	254	0.93	0.678	Q6P1G2 Q8BKG3 Q8BTW9 Q8K1M6 Q8K2T8 Q8K4E0 Q8R1Q8 Q9R1C7	GO_BP
Cluster1	regulation of cellular localization	2	36	22	254	0.64	0.852	E9Q5F9 Q9R0L6	GO_BP
Cluster1	regulation of cellular metabolic process	13	36	132	254	0.69	0.988	E9Q5F9 O08784 O35625 Q0VBL3 Q61083 Q6P1G2 Q6P5F6 Q8BKI2 Q8BTW9 Q8K1M6 Q8K2T8 Q924A2 Q99MN1	GO_BP
Cluster1	regulation of cellular process	24	36	192	254	0.88	0.937	E9Q5F9 O08784 O35625 P09103 P09528 P57776 Q0VBL3 Q61083 Q62433 Q6P1G2 Q6P5F6 Q8BKG3 Q8BKI2 Q8BTW9 Q8K1M6 Q8K2T8 Q8K4E0 Q8R1Q8 Q924A2 Q99MN1 Q99PL5 Q9R0L6 Q9R1C7 Q9Z0U1	GO_BP
Cluster1	regulation of cellular protein catabolic process	1	36	9	254	0.78	0.753	O35625	GO_BP
Cluster1	regulation of cellular protein localization	2	36	19	254	0.74	0.785	E9Q5F9 Q9R0L6	GO_BP
Cluster1	regulation of cellular protein metabolic process	7	36	59	254	0.84	0.783	O08784 O35625 Q61083 Q6P5F6 Q8BTW9 Q8K2T8 Q99MN1	GO_BP
Cluster1	regulation of cellular response to stress	5	36	25	254	1.41	0.269	E9Q5F9 O35625 P09103 Q61083 Q99MN1	GO_BP
Cluster1	regulation of centrosome cycle	1	36	2	254	3.53	0.264	Q8R1Q8	GO_BP
Cluster1	regulation of chemotaxis	1	36	4	254	1.76	0.46	Q99MN1	GO_BP
Cluster1	regulation of chromatin organization	1	36	5	254	1.41	0.537	Q8K2T8	GO_BP
Cluster1	regulation of chromosome organization	2	36	11	254	1.28	0.479	Q8K2T8 Q8R1Q8	GO_BP
Cluster1	regulation of chromosome segregation	1	36	4	254	1.76	0.46	Q8R1Q8	GO_BP
Cluster1	regulation of chromosome separation	1	36	2	254	3.53	0.264	Q8R1Q8	GO_BP
Cluster1	regulation of cytokine production	3	36	9	254	2.35	0.12	E9Q5F9 Q8K0F1 Q99MN1	GO_BP
Cluster1	regulation of cytokine secretion	1	36	3	254	2.35	0.369	Q99MN1	GO_BP
Cluster1	regulation of cytokinesis	2	36	5	254	2.82	0.148	E9Q5F9 Q9R1C7	GO_BP
Cluster1	regulation of cytoskeleton organization	2	36	15	254	0.94	0.657	Q8K4E0 Q8R1Q8	GO_BP
Cluster1	regulation of defense response	2	36	13	254	1.09	0.574	Q8K0F1 Q99MN1	GO_BP
Cluster1	regulation of dephosphorylation	1	36	5	254	1.41	0.537	Q6P5F6	GO_BP
Cluster1	regulation of developmental growth	1	36	6	254	1.18	0.604	Q8K4E0	GO_BP
Cluster1	regulation of developmental process	12	36	64	254	1.32	0.157	O35625 Q0VBL3 Q6P1G2 Q8BKG3 Q8BKI2 Q8BTW9 Q8K1M6 Q8K2T8 Q8K4E0 Q9R0L6 Q9R1C7 Q9Z0U1	GO_BP
Cluster1	regulation of DNA metabolic process	1	36	11	254	0.64	0.821	E9Q5F9	GO_BP
Cluster1	regulation of DNA recombination	1	36	2	254	3.53	0.264	E9Q5F9	GO_BP
Cluster1	regulation of DNA repair	1	36	3	254	2.35	0.369	E9Q5F9	GO_BP
Cluster1	regulation of double-strand break repair	1	36	2	254	3.53	0.264	E9Q5F9	GO_BP
Cluster1	regulation of embryonic development	1	36	4	254	1.76	0.46	Q8BKG3	GO_BP
Cluster1	regulation of endothelial cell apoptotic process	1	36	2	254	3.53	0.264	Q8BTW9	GO_BP
Cluster1	regulation of epithelial cell apoptotic process	1	36	2	254	3.53	0.264	Q8BTW9	GO_BP
Cluster1	regulation of epithelial tube formation	1	36	2	254	3.53	0.264	Q8BKG3	GO_BP
Cluster1	regulation of ERK1 and ERK2 cascade	1	36	9	254	0.78	0.753	Q99MN1	GO_BP
Cluster1	regulation of establishment of planar polarity	1	36	3	254	2.35	0.369	Q8BKG3	GO_BP
Cluster1	regulation of fat cell differentiation	2	36	7	254	2.02	0.26	O35625 Q8K4E0	GO_BP
Cluster1	regulation of fibroblast proliferation	1	36	5	254	1.41	0.537	P09528	GO_BP
Cluster1	regulation of gene expression	11	36	95	254	0.82	0.865	E9Q5F9 O08784 O35625 P62751 Q0VBL3 Q61083 Q6P1G2 Q8BKI2 Q8K2T8 Q924A2 Q99MN1	GO_BP
Cluster1	regulation of gene expression, epigenetic	2	36	11	254	1.28	0.479	Q0VBL3 Q8BKI2	GO_BP
Cluster1	regulation of granulocyte chemotaxis	1	36	2	254	3.53	0.264	Q99MN1	GO_BP
Cluster1	regulation of growth	3	36	18	254	1.18	0.484	Q6P1G2 Q8BTW9 Q8K4E0	GO_BP
Cluster1	regulation of GTPase activity	2	36	21	254	0.67	0.832	O35625 Q8K1M6	GO_BP
Cluster1	regulation of hemopoiesis	4	36	15	254	1.88	0.147	Q0VBL3 Q8BKI2 Q8K2T8 Q9Z0U1	GO_BP
Cluster1	regulation of histone methylation	1	36	3	254	2.35	0.369	Q8K2T8	GO_BP
Cluster1	regulation of histone modification	1	36	5	254	1.41	0.537	Q8K2T8	GO_BP
Cluster1	regulation of hydrolase activity	4	36	40	254	0.71	0.86	O35625 Q6P5F6 Q8K1M6 Q99MN1	GO_BP
Cluster1	regulation of immune effector process	1	36	5	254	1.41	0.537	Q99MN1	GO_BP
Cluster1	regulation of immune response	2	36	15	254	0.94	0.657	Q6P5F6 Q99MN1	GO_BP
Cluster1	regulation of immune system process	6	36	32	254	1.32	0.289	Q0VBL3 Q6P5F6 Q8BKI2 Q8K2T8 Q99MN1 Q9Z0U1	GO_BP
Cluster1	regulation of inflammatory response	2	36	8	254	1.76	0.317	Q8K0F1 Q99MN1	GO_BP
Cluster1	regulation of interferon-alpha production	1	36	2	254	3.53	0.264	E9Q5F9	GO_BP
Cluster1	regulation of interleukin-6 production	1	36	3	254	2.35	0.369	Q8K0F1	GO_BP
Cluster1	regulation of intracellular protein transport	2	36	9	254	1.57	0.373	E9Q5F9 Q9R0L6	GO_BP
Cluster1	regulation of intracellular signal transduction	6	36	43	254	0.98	0.598	O35625 P09103 Q61083 Q8BTW9 Q8K1M6 Q99MN1	GO_BP
Cluster1	regulation of intracellular transport	2	36	11	254	1.28	0.479	E9Q5F9 Q9R0L6	GO_BP
Cluster1	regulation of JNK cascade	2	36	5	254	2.82	0.148	O35625 Q61083	GO_BP
Cluster1	regulation of JUN kinase activity	2	36	4	254	3.53	0.0975	O35625 Q61083	GO_BP
Cluster1	regulation of kinase activity	4	36	24	254	1.18	0.452	O35625 Q61083 Q8BTW9 Q99MN1	GO_BP
Cluster1	regulation of leukocyte activation	2	36	12	254	1.18	0.528	Q6P5F6 Q99MN1	GO_BP
Cluster1	regulation of leukocyte apoptotic process	1	36	5	254	1.41	0.537	Q6P5F6	GO_BP
Cluster1	regulation of leukocyte chemotaxis	1	36	3	254	2.35	0.369	Q99MN1	GO_BP
Cluster1	regulation of leukocyte differentiation	1	36	10	254	0.71	0.79	Q9Z0U1	GO_BP
Cluster1	regulation of leukocyte migration	1	36	4	254	1.76	0.46	Q99MN1	GO_BP
Cluster1	regulation of leukocyte proliferation	1	36	5	254	1.41	0.537	Q6P5F6	GO_BP
Cluster1	regulation of localization	4	36	61	254	0.46	0.99	E9Q5F9 Q8K1M6 Q99MN1 Q9R0L6	GO_BP
Cluster1	regulation of locomotion	1	36	22	254	0.32	0.97	Q99MN1	GO_BP
Cluster1	regulation of lymphocyte activation	1	36	11	254	0.64	0.821	Q6P5F6	GO_BP
Cluster1	regulation of lymphocyte apoptotic process	1	36	3	254	2.35	0.369	Q6P5F6	GO_BP
Cluster1	regulation of lymphocyte proliferation	1	36	5	254	1.41	0.537	Q6P5F6	GO_BP
Cluster1	regulation of macromolecule biosynthetic process	8	36	91	254	0.62	0.981	O08784 O35625 Q0VBL3 Q61083 Q6P1G2 Q8K2T8 Q924A2 Q99MN1	GO_BP
Cluster1	regulation of macromolecule metabolic process	13	36	130	254	0.71	0.984	E9Q5F9 O08784 O35625 P62751 Q0VBL3 Q61083 Q6P1G2 Q6P5F6 Q8BKI2 Q8BTW9 Q8K2T8 Q924A2 Q99MN1	GO_BP
Cluster1	regulation of macrophage activation	1	36	1	254	7.06	0.142	Q99MN1	GO_BP
Cluster1	regulation of macrophage chemotaxis	1	36	2	254	3.53	0.264	Q99MN1	GO_BP
Cluster1	regulation of macrophage migration	1	36	2	254	3.53	0.264	Q99MN1	GO_BP
Cluster1	regulation of MAP kinase activity	3	36	11	254	1.92	0.193	O35625 Q61083 Q99MN1	GO_BP
Cluster1	regulation of MAPK cascade	4	36	19	254	1.49	0.274	O35625 Q61083 Q8BTW9 Q99MN1	GO_BP
Cluster1	regulation of megakaryocyte differentiation	2	36	3	254	4.7	0.0535	Q0VBL3 Q8BKI2	GO_BP
Cluster1	regulation of membrane permeability	1	36	3	254	2.35	0.369	Q9Z0U1	GO_BP
Cluster1	regulation of metabolic process	14	36	138	254	0.72	0.986	E9Q5F9 O08784 O35625 P62751 Q0VBL3 Q61083 Q6P1G2 Q6P5F6 Q8BKI2 Q8BTW9 Q8K1M6 Q8K2T8 Q924A2 Q99MN1	GO_BP
Cluster1	regulation of metallopeptidase activity	1	36	3	254	2.35	0.369	Q99MN1	GO_BP
Cluster1	regulation of microtubule-based process	1	36	6	254	1.18	0.604	Q8R1Q8	GO_BP
Cluster1	regulation of mitochondrial fission	1	36	1	254	7.06	0.142	Q8K1M6	GO_BP
Cluster1	regulation of mitochondrion organization	1	36	3	254	2.35	0.369	Q8K1M6	GO_BP
Cluster1	regulation of mitotic cell cycle	5	36	22	254	1.6	0.184	Q61083 Q8BTW9 Q8K4E0 Q8R1Q8 Q9R0L6	GO_BP
Cluster1	regulation of mitotic cell cycle phase transition	3	36	11	254	1.92	0.193	Q8K4E0 Q8R1Q8 Q9R0L6	GO_BP
Cluster1	regulation of mitotic nuclear division	1	36	4	254	1.76	0.46	Q8R1Q8	GO_BP
Cluster1	regulation of mitotic sister chromatid segregation	1	36	2	254	3.53	0.264	Q8R1Q8	GO_BP
Cluster1	regulation of mitotic sister chromatid separation	1	36	2	254	3.53	0.264	Q8R1Q8	GO_BP
Cluster1	regulation of mitotic spindle checkpoint	1	36	1	254	7.06	0.142	Q8R1Q8	GO_BP
Cluster1	regulation of molecular function	6	36	75	254	0.56	0.983	O35625 Q61083 Q6P5F6 Q8BTW9 Q8K1M6 Q99MN1	GO_BP
Cluster1	regulation of mononuclear cell migration	1	36	2	254	3.53	0.264	Q99MN1	GO_BP
Cluster1	regulation of mononuclear cell proliferation	1	36	5	254	1.41	0.537	Q6P5F6	GO_BP
Cluster1	regulation of morphogenesis of an epithelium	1	36	5	254	1.41	0.537	Q8BKG3	GO_BP
Cluster1	regulation of mRNA 3'-end processing	1	36	3	254	2.35	0.369	Q8K2T8	GO_BP
Cluster1	regulation of mRNA catabolic process	1	36	7	254	1.01	0.662	Q8BKI2	GO_BP
Cluster1	regulation of mRNA export from nucleus	1	36	1	254	7.06	0.142	E9Q5F9	GO_BP
Cluster1	regulation of mRNA metabolic process	3	36	14	254	1.51	0.317	Q0VBL3 Q8BKI2 Q8K2T8	GO_BP
Cluster1	regulation of mRNA processing	2	36	9	254	1.57	0.373	Q0VBL3 Q8K2T8	GO_BP
Cluster1	regulation of mRNA splicing, via spliceosome	1	36	6	254	1.18	0.604	Q0VBL3	GO_BP
Cluster1	regulation of multi-organism process	1	36	12	254	0.59	0.847	P09103	GO_BP
Cluster1	regulation of multicellular organism growth	1	36	2	254	3.53	0.264	Q8K4E0	GO_BP
Cluster1	regulation of multicellular organismal development	7	36	47	254	1.05	0.516	Q0VBL3 Q8BKG3 Q8BKI2 Q8BTW9 Q8K2T8 Q9R0L6 Q9Z0U1	GO_BP
Cluster1	regulation of multicellular organismal process	12	36	64	254	1.32	0.157	E9Q5F9 Q0VBL3 Q6P1G2 Q8BKG3 Q8BKI2 Q8BTW9 Q8K0F1 Q8K2T8 Q8K4E0 Q99MN1 Q9R0L6 Q9Z0U1	GO_BP
Cluster1	regulation of myeloid cell differentiation	4	36	10	254	2.82	0.0383	Q0VBL3 Q8BKI2 Q8K2T8 Q9Z0U1	GO_BP
Cluster1	regulation of myeloid leukocyte differentiation	1	36	5	254	1.41	0.537	Q9Z0U1	GO_BP
Cluster1	regulation of necrotic cell death	1	36	2	254	3.53	0.264	P09528	GO_BP
Cluster1	regulation of nervous system development	2	36	18	254	0.78	0.757	Q8BKG3 Q9R0L6	GO_BP
Cluster1	regulation of neural precursor cell proliferation	1	36	2	254	3.53	0.264	Q6P1G2	GO_BP
Cluster1	regulation of neurogenesis	2	36	17	254	0.83	0.727	Q8BKG3 Q9R0L6	GO_BP
Cluster1	regulation of neuron apoptotic process	1	36	4	254	1.76	0.46	Q6P1G2	GO_BP
Cluster1	regulation of neuron death	1	36	5	254	1.41	0.537	Q6P1G2	GO_BP
Cluster1	regulation of neuron differentiation	1	36	12	254	0.59	0.847	Q8BKG3	GO_BP
Cluster1	regulation of neuron projection development	1	36	10	254	0.71	0.79	Q8BKG3	GO_BP
Cluster1	regulation of nitrogen compound metabolic process	12	36	122	254	0.69	0.982	E9Q5F9 O08784 O35625 Q0VBL3 Q61083 Q6P1G2 Q6P5F6 Q8BKI2 Q8BTW9 Q8K2T8 Q924A2 Q99MN1	GO_BP
Cluster1	regulation of nuclear division	1	36	5	254	1.41	0.537	Q8R1Q8	GO_BP
Cluster1	regulation of nucleic acid-templated transcription	7	36	78	254	0.63	0.966	O35625 Q0VBL3 Q61083 Q6P1G2 Q8K2T8 Q924A2 Q99MN1	GO_BP
Cluster1	regulation of nucleocytoplasmic transport	1	36	8	254	0.88	0.711	E9Q5F9	GO_BP
Cluster1	regulation of organelle organization	4	36	34	254	0.83	0.749	Q8K1M6 Q8K2T8 Q8K4E0 Q8R1Q8	GO_BP
Cluster1	regulation of osteoclast development	1	36	1	254	7.06	0.142	Q9Z0U1	GO_BP
Cluster1	regulation of osteoclast differentiation	1	36	3	254	2.35	0.369	Q9Z0U1	GO_BP
Cluster1	regulation of oxidative stress-induced cell death	1	36	3	254	2.35	0.369	P09103	GO_BP
Cluster1	regulation of p38MAPK cascade	1	36	3	254	2.35	0.369	Q99MN1	GO_BP
Cluster1	regulation of peptidase activity	1	36	9	254	0.78	0.753	Q99MN1	GO_BP
Cluster1	regulation of peptide secretion	2	36	10	254	1.41	0.427	Q8K1M6 Q99MN1	GO_BP
Cluster1	regulation of peptide transport	4	36	19	254	1.49	0.274	E9Q5F9 Q8K1M6 Q99MN1 Q9R0L6	GO_BP
Cluster1	regulation of peptidyl-serine phosphorylation	1	36	4	254	1.76	0.46	O35625	GO_BP
Cluster1	regulation of peptidyl-threonine phosphorylation	1	36	5	254	1.41	0.537	O35625	GO_BP
Cluster1	regulation of peroxisome organization	1	36	1	254	7.06	0.142	Q8K1M6	GO_BP
Cluster1	regulation of phosphatase activity	1	36	5	254	1.41	0.537	Q6P5F6	GO_BP
Cluster1	regulation of phosphate metabolic process	5	36	38	254	0.93	0.659	O35625 Q61083 Q6P5F6 Q8BTW9 Q99MN1	GO_BP
Cluster1	regulation of phosphoprotein phosphatase activity	1	36	2	254	3.53	0.264	Q6P5F6	GO_BP
Cluster1	regulation of phosphorus metabolic process	5	36	38	254	0.93	0.659	O35625 Q61083 Q6P5F6 Q8BTW9 Q99MN1	GO_BP
Cluster1	regulation of phosphorylation	4	36	33	254	0.86	0.725	O35625 Q61083 Q8BTW9 Q99MN1	GO_BP
Cluster1	regulation of plasma lipoprotein particle levels	1	36	1	254	7.06	0.142	P09103	GO_BP
Cluster1	regulation of primary metabolic process	12	36	127	254	0.67	0.991	E9Q5F9 O08784 O35625 Q0VBL3 Q61083 Q6P1G2 Q6P5F6 Q8BKI2 Q8BTW9 Q8K2T8 Q924A2 Q99MN1	GO_BP
Cluster1	regulation of programmed cell death	8	36	41	254	1.38	0.201	P09103 Q61083 Q62433 Q6P1G2 Q6P5F6 Q8BTW9 Q8K1M6 Q8K4E0	GO_BP
Cluster1	regulation of protein catabolic process	1	36	10	254	0.71	0.79	O35625	GO_BP
Cluster1	regulation of protein dephosphorylation	1	36	2	254	3.53	0.264	Q6P5F6	GO_BP
Cluster1	regulation of protein export from nucleus	1	36	3	254	2.35	0.369	E9Q5F9	GO_BP
Cluster1	regulation of protein kinase activity	4	36	21	254	1.34	0.345	O35625 Q61083 Q8BTW9 Q99MN1	GO_BP
Cluster1	regulation of protein localization	4	36	30	254	0.94	0.645	E9Q5F9 Q8K1M6 Q99MN1 Q9R0L6	GO_BP
Cluster1	regulation of protein localization to chromatin	1	36	1	254	7.06	0.142	E9Q5F9	GO_BP
Cluster1	regulation of protein metabolic process	7	36	59	254	0.84	0.783	O08784 O35625 Q61083 Q6P5F6 Q8BTW9 Q8K2T8 Q99MN1	GO_BP
Cluster1	regulation of protein modification process	6	36	41	254	1.03	0.544	O35625 Q61083 Q6P5F6 Q8BTW9 Q8K2T8 Q99MN1	GO_BP
Cluster1	regulation of protein oligomerization	1	36	2	254	3.53	0.264	Q8K1M6	GO_BP
Cluster1	regulation of protein phosphorylation	4	36	31	254	0.91	0.673	O35625 Q61083 Q8BTW9 Q99MN1	GO_BP
Cluster1	regulation of protein secretion	2	36	10	254	1.41	0.427	Q8K1M6 Q99MN1	GO_BP
Cluster1	regulation of protein transport	4	36	19	254	1.49	0.274	E9Q5F9 Q8K1M6 Q99MN1 Q9R0L6	GO_BP
Cluster1	regulation of protein ubiquitination	1	36	6	254	1.18	0.604	O35625	GO_BP
Cluster1	regulation of protein-containing complex assembly	1	36	11	254	0.64	0.821	Q8K1M6	GO_BP
Cluster1	regulation of proteolysis	2	36	18	254	0.78	0.757	O35625 Q99MN1	GO_BP
Cluster1	regulation of response to DNA damage stimulus	1	36	6	254	1.18	0.604	E9Q5F9	GO_BP
Cluster1	regulation of response to external stimulus	2	36	13	254	1.09	0.574	Q8K0F1 Q99MN1	GO_BP
Cluster1	regulation of response to oxidative stress	1	36	3	254	2.35	0.369	P09103	GO_BP
Cluster1	regulation of response to stimulus	9	36	70	254	0.91	0.711	E9Q5F9 O35625 P09103 Q61083 Q6P5F6 Q8BTW9 Q8K0F1 Q8K1M6 Q99MN1	GO_BP
Cluster1	regulation of response to stress	6	36	34	254	1.25	0.345	E9Q5F9 O35625 P09103 Q61083 Q8K0F1 Q99MN1	GO_BP
Cluster1	regulation of RNA biosynthetic process	7	36	78	254	0.63	0.966	O35625 Q0VBL3 Q61083 Q6P1G2 Q8K2T8 Q924A2 Q99MN1	GO_BP
Cluster1	regulation of RNA export from nucleus	1	36	3	254	2.35	0.369	E9Q5F9	GO_BP
Cluster1	regulation of RNA metabolic process	8	36	85	254	0.66	0.962	O35625 Q0VBL3 Q61083 Q6P1G2 Q8BKI2 Q8K2T8 Q924A2 Q99MN1	GO_BP
Cluster1	regulation of RNA splicing	1	36	7	254	1.01	0.662	Q0VBL3	GO_BP
Cluster1	regulation of secretion	2	36	12	254	1.18	0.528	Q8K1M6 Q99MN1	GO_BP
Cluster1	regulation of secretion by cell	2	36	12	254	1.18	0.528	Q8K1M6 Q99MN1	GO_BP
Cluster1	regulation of signal transduction	7	36	58	254	0.85	0.765	O35625 P09103 Q61083 Q6P5F6 Q8BTW9 Q8K1M6 Q99MN1	GO_BP
Cluster1	regulation of signaling	7	36	63	254	0.78	0.844	O35625 P09103 Q61083 Q6P5F6 Q8BTW9 Q8K1M6 Q99MN1	GO_BP
Cluster1	regulation of sister chromatid segregation	1	36	4	254	1.76	0.46	Q8R1Q8	GO_BP
Cluster1	regulation of spindle checkpoint	1	36	1	254	7.06	0.142	Q8R1Q8	GO_BP
Cluster1	regulation of stem cell population maintenance	1	36	3	254	2.35	0.369	Q6P1G2	GO_BP
Cluster1	regulation of stress fiber assembly	1	36	5	254	1.41	0.537	Q8K4E0	GO_BP
Cluster1	regulation of stress-activated MAPK cascade	3	36	10	254	2.12	0.155	O35625 Q61083 Q99MN1	GO_BP
Cluster1	regulation of supramolecular fiber organization	1	36	11	254	0.64	0.821	Q8K4E0	GO_BP
Cluster1	regulation of transcription by RNA polymerase II	5	36	59	254	0.6	0.956	O35625 Q0VBL3 Q6P1G2 Q8K2T8 Q924A2	GO_BP
Cluster1	regulation of transcription, DNA-templated	7	36	78	254	0.63	0.966	O35625 Q0VBL3 Q61083 Q6P1G2 Q8K2T8 Q924A2 Q99MN1	GO_BP
Cluster1	regulation of transferase activity	4	36	26	254	1.09	0.52	O35625 Q61083 Q8BTW9 Q99MN1	GO_BP
Cluster1	regulation of translation	1	36	12	254	0.59	0.847	O08784	GO_BP
Cluster1	regulation of transport	4	36	33	254	0.86	0.725	E9Q5F9 Q8K1M6 Q99MN1 Q9R0L6	GO_BP
Cluster1	regulation of tumor necrosis factor production	1	36	4	254	1.76	0.46	Q8K0F1	GO_BP
Cluster1	regulation of type I interferon production	1	36	4	254	1.76	0.46	E9Q5F9	GO_BP
Cluster1	regulation of vasculature development	1	36	5	254	1.41	0.537	Q8BTW9	GO_BP
Cluster1	regulation of viral entry into host cell	1	36	1	254	7.06	0.142	P09103	GO_BP
Cluster1	regulation of viral life cycle	1	36	4	254	1.76	0.46	P09103	GO_BP
Cluster1	regulation of viral process	1	36	7	254	1.01	0.662	P09103	GO_BP
Cluster1	regulation of Wnt signaling pathway	1	36	4	254	1.76	0.46	O35625	GO_BP
Cluster1	release of cytochrome c from mitochondria	1	36	2	254	3.53	0.264	Q8K1M6	GO_BP
Cluster1	reproduction	4	36	19	254	1.49	0.274	E9Q5F9 Q0VBL3 Q6P1G2 Q8K4E0	GO_BP
Cluster1	reproductive process	4	36	19	254	1.49	0.274	E9Q5F9 Q0VBL3 Q6P1G2 Q8K4E0	GO_BP
Cluster1	reproductive structure development	2	36	13	254	1.09	0.574	E9Q5F9 Q0VBL3	GO_BP
Cluster1	reproductive system development	2	36	13	254	1.09	0.574	E9Q5F9 Q0VBL3	GO_BP
Cluster1	respiratory system development	3	36	9	254	2.35	0.12	O35625 Q8BKG3 Q924A2	GO_BP
Cluster1	respiratory tube development	2	36	8	254	1.76	0.317	Q8BKG3 Q924A2	GO_BP
Cluster1	response to abiotic stimulus	5	36	20	254	1.76	0.134	P09103 P57776 Q61083 Q62433 Q99MN1	GO_BP
Cluster1	response to acid chemical	1	36	2	254	3.53	0.264	Q8BKG3	GO_BP
Cluster1	response to bacterium	1	36	10	254	0.71	0.79	Q8K2T8	GO_BP
Cluster1	response to biotic stimulus	2	36	14	254	1.01	0.617	E9Q5F9 Q8K2T8	GO_BP
Cluster1	response to chemical	9	36	62	254	1.02	0.538	E9Q5F9 P09103 Q0VBL3 Q62433 Q8BKG3 Q8K2T8 Q8R1Q8 Q99MN1 Q9Z0U1	GO_BP
Cluster1	response to cytokine	5	36	19	254	1.86	0.112	E9Q5F9 P09103 Q0VBL3 Q99MN1 Q9Z0U1	GO_BP
Cluster1	response to decreased oxygen levels	2	36	4	254	3.53	0.0975	P09103 Q62433	GO_BP
Cluster1	response to endogenous stimulus	1	36	28	254	0.25	0.989	Q8R1Q8	GO_BP
Cluster1	response to endoplasmic reticulum stress	1	36	7	254	1.01	0.662	P09103	GO_BP
Cluster1	response to external biotic stimulus	2	36	14	254	1.01	0.617	E9Q5F9 Q8K2T8	GO_BP
Cluster1	response to external stimulus	3	36	31	254	0.68	0.853	E9Q5F9 Q61083 Q8K2T8	GO_BP
Cluster1	response to growth factor	1	36	12	254	0.59	0.847	Q8R1Q8	GO_BP
Cluster1	response to hypoxia	2	36	4	254	3.53	0.0975	P09103 Q62433	GO_BP
Cluster1	response to inorganic substance	1	36	10	254	0.71	0.79	Q62433	GO_BP
Cluster1	response to interleukin-12	1	36	1	254	7.06	0.142	P09103	GO_BP
Cluster1	response to ionizing radiation	2	36	3	254	4.7	0.0535	P57776 Q99MN1	GO_BP
Cluster1	response to lipid	2	36	17	254	0.83	0.727	Q8BKG3 Q8K2T8	GO_BP
Cluster1	response to lipopolysaccharide	1	36	8	254	0.88	0.711	Q8K2T8	GO_BP
Cluster1	response to mechanical stimulus	1	36	5	254	1.41	0.537	Q61083	GO_BP
Cluster1	response to metal ion	1	36	8	254	0.88	0.711	Q62433	GO_BP
Cluster1	response to molecule of bacterial origin	1	36	8	254	0.88	0.711	Q8K2T8	GO_BP
Cluster1	response to nerve growth factor	1	36	1	254	7.06	0.142	Q8R1Q8	GO_BP
Cluster1	response to organic substance	8	36	53	254	1.06	0.49	E9Q5F9 P09103 Q0VBL3 Q8BKG3 Q8K2T8 Q8R1Q8 Q99MN1 Q9Z0U1	GO_BP
Cluster1	response to other organism	2	36	14	254	1.01	0.617	E9Q5F9 Q8K2T8	GO_BP
Cluster1	response to oxygen levels	2	36	4	254	3.53	0.0975	P09103 Q62433	GO_BP
Cluster1	response to oxygen-containing compound	2	36	25	254	0.56	0.9	Q8BKG3 Q8K2T8	GO_BP
Cluster1	response to radiation	2	36	5	254	2.82	0.148	P57776 Q99MN1	GO_BP
Cluster1	response to retinoic acid	1	36	1	254	7.06	0.142	Q8BKG3	GO_BP
Cluster1	response to stimulus	18	36	123	254	1.03	0.49	E9Q5F9 O35625 P09103 P09528 P57776 Q0VBL3 Q61083 Q62433 Q8BKG3 Q8BKI2 Q8BTW9 Q8K1M6 Q8K2T8 Q8K4E0 Q8R1Q8 Q99MN1 Q99PL5 Q9Z0U1	GO_BP
Cluster1	response to stress	7	36	57	254	0.87	0.747	E9Q5F9 O35625 P09103 Q61083 Q62433 Q8BKG3 Q8BTW9	GO_BP
Cluster1	response to tumor necrosis factor	2	36	8	254	1.76	0.317	Q99MN1 Q9Z0U1	GO_BP
Cluster1	response to type I interferon	1	36	1	254	7.06	0.142	E9Q5F9	GO_BP
Cluster1	response to virus	1	36	3	254	2.35	0.369	E9Q5F9	GO_BP
Cluster1	response to wounding	1	36	12	254	0.59	0.847	Q8BKG3	GO_BP
Cluster1	response to X-ray	1	36	1	254	7.06	0.142	Q99MN1	GO_BP
Cluster1	retinal rod cell development	1	36	1	254	7.06	0.142	Q8K4E0	GO_BP
Cluster1	retrograde transport, endosome to Golgi	1	36	6	254	1.18	0.604	Q8K0F1	GO_BP
Cluster1	Rho protein signal transduction	1	36	4	254	1.76	0.46	Q8BTW9	GO_BP
Cluster1	ribonucleoprotein complex assembly	1	36	7	254	1.01	0.662	P62751	GO_BP
Cluster1	ribonucleoprotein complex biogenesis	2	36	13	254	1.09	0.574	P62751 Q9CR57	GO_BP
Cluster1	ribonucleoprotein complex export from nucleus	2	36	8	254	1.76	0.317	Q52KI8 Q8R0F5	GO_BP
Cluster1	ribonucleoprotein complex localization	2	36	8	254	1.76	0.317	Q52KI8 Q8R0F5	GO_BP
Cluster1	ribonucleoprotein complex subunit organization	1	36	7	254	1.01	0.662	P62751	GO_BP
Cluster1	ribonucleoside diphosphate metabolic process	1	36	2	254	3.53	0.264	Q9Z0U1	GO_BP
Cluster1	ribonucleoside metabolic process	1	36	4	254	1.76	0.46	Q9Z0U1	GO_BP
Cluster1	ribonucleoside monophosphate metabolic process	1	36	2	254	3.53	0.264	Q9Z0U1	GO_BP
Cluster1	ribonucleotide metabolic process	1	36	3	254	2.35	0.369	Q9Z0U1	GO_BP
Cluster1	ribose phosphate metabolic process	1	36	3	254	2.35	0.369	Q9Z0U1	GO_BP
Cluster1	ribosomal large subunit assembly	1	36	1	254	7.06	0.142	P62751	GO_BP
Cluster1	ribosomal large subunit biogenesis	2	36	2	254	7.06	0.0196	P62751 Q9CR57	GO_BP
Cluster1	ribosome assembly	1	36	1	254	7.06	0.142	P62751	GO_BP
Cluster1	ribosome biogenesis	2	36	7	254	2.02	0.26	P62751 Q9CR57	GO_BP
Cluster1	RNA 3'-end processing	2	36	8	254	1.76	0.317	Q52KI8 Q8K2T8	GO_BP
Cluster1	RNA biosynthetic process	4	36	26	254	1.09	0.52	E9Q5F9 O08784 P57776 Q8K2T8	GO_BP
Cluster1	RNA catabolic process	1	36	6	254	1.18	0.604	P62751	GO_BP
Cluster1	RNA export from nucleus	2	36	8	254	1.76	0.317	Q52KI8 Q8R0F5	GO_BP
Cluster1	RNA localization	2	36	8	254	1.76	0.317	Q52KI8 Q8R0F5	GO_BP
Cluster1	RNA metabolic process	13	36	60	254	1.53	0.049	A2AR02 E9Q5F9 O08784 P57776 P62751 Q0VBL3 Q52KI8 Q6NV83 Q8K2T8 Q8R0F5 Q99MN1 Q9CR57 Q9R1C7	GO_BP
Cluster1	RNA methylation	1	36	5	254	1.41	0.537	Q0VBL3	GO_BP
Cluster1	RNA modification	1	36	8	254	0.88	0.711	Q0VBL3	GO_BP
Cluster1	RNA polyadenylation	1	36	4	254	1.76	0.46	Q8K2T8	GO_BP
Cluster1	RNA processing	9	36	38	254	1.67	0.0636	A2AR02 Q0VBL3 Q52KI8 Q6NV83 Q8K2T8 Q8R0F5 Q99MN1 Q9CR57 Q9R1C7	GO_BP
Cluster1	RNA splicing	6	36	23	254	1.84	0.0862	A2AR02 Q0VBL3 Q52KI8 Q6NV83 Q8R0F5 Q9R1C7	GO_BP
Cluster1	RNA splicing, via transesterification reactions	5	36	21	254	1.68	0.158	Q0VBL3 Q52KI8 Q6NV83 Q8R0F5 Q9R1C7	GO_BP
Cluster1	RNA transport	2	36	8	254	1.76	0.317	Q52KI8 Q8R0F5	GO_BP
Cluster1	rostrocaudal neural tube patterning	1	36	1	254	7.06	0.142	Q6P1G2	GO_BP
Cluster1	rRNA metabolic process	2	36	7	254	2.02	0.26	O08784 Q9CR57	GO_BP
Cluster1	rRNA processing	1	36	5	254	1.41	0.537	Q9CR57	GO_BP
Cluster1	rRNA transcription	1	36	2	254	3.53	0.264	O08784	GO_BP
Cluster1	Schwann cell development	1	36	2	254	3.53	0.264	Q62433	GO_BP
Cluster1	Schwann cell differentiation	1	36	3	254	2.35	0.369	Q62433	GO_BP
Cluster1	second-messenger-mediated signaling	1	36	5	254	1.41	0.537	Q8K4E0	GO_BP
Cluster1	secretion	1	36	12	254	0.59	0.847	Q8R1Q8	GO_BP
Cluster1	secretion by cell	1	36	11	254	0.64	0.821	Q8R1Q8	GO_BP
Cluster1	sensory organ development	4	36	14	254	2.02	0.119	O35625 Q6P1G2 Q8BKG3 Q8K4E0	GO_BP
Cluster1	sensory organ morphogenesis	4	36	10	254	2.82	0.0383	O35625 Q6P1G2 Q8BKG3 Q8K4E0	GO_BP
Cluster1	sensory perception	2	36	6	254	2.35	0.203	O35625 Q8K4E0	GO_BP
Cluster1	sensory perception of mechanical stimulus	2	36	4	254	3.53	0.0975	O35625 Q8K4E0	GO_BP
Cluster1	sensory perception of sound	2	36	4	254	3.53	0.0975	O35625 Q8K4E0	GO_BP
Cluster1	sequestering of iron ion	1	36	1	254	7.06	0.142	P09528	GO_BP
Cluster1	sequestering of metal ion	1	36	1	254	7.06	0.142	P09528	GO_BP
Cluster1	sexual reproduction	2	36	6	254	2.35	0.203	Q6P1G2 Q8K4E0	GO_BP
Cluster1	signal transduction	13	36	77	254	1.19	0.264	O35625 P09103 Q0VBL3 Q61083 Q62433 Q8BKG3 Q8BKI2 Q8BTW9 Q8K1M6 Q8K4E0 Q99MN1 Q99PL5 Q9Z0U1	GO_BP
Cluster1	signal transduction by p53 class mediator	1	36	3	254	2.35	0.369	Q62433	GO_BP
Cluster1	signal transduction by protein phosphorylation	4	36	14	254	2.02	0.119	O35625 Q61083 Q8BTW9 Q99MN1	GO_BP
Cluster1	signal transduction in response to DNA damage	1	36	1	254	7.06	0.142	Q62433	GO_BP
Cluster1	signaling	13	36	80	254	1.15	0.322	O35625 P09103 Q0VBL3 Q61083 Q62433 Q8BKG3 Q8BKI2 Q8BTW9 Q8K1M6 Q8K4E0 Q99MN1 Q99PL5 Q9Z0U1	GO_BP
Cluster1	skeletal system development	3	36	9	254	2.35	0.12	E9Q5F9 O08784 O35625	GO_BP
Cluster1	skeletal system morphogenesis	2	36	6	254	2.35	0.203	E9Q5F9 O35625	GO_BP
Cluster1	small GTPase mediated signal transduction	1	36	11	254	0.64	0.821	Q8BTW9	GO_BP
Cluster1	small molecule metabolic process	3	36	15	254	1.41	0.359	P09103 Q99MN1 Q9Z0U1	GO_BP
Cluster1	social behavior	2	36	2	254	7.06	0.0196	Q924A2 Q9R0L6	GO_BP
Cluster1	specification of symmetry	1	36	1	254	7.06	0.142	O35625	GO_BP
Cluster1	spermatid development	1	36	1	254	7.06	0.142	Q8K4E0	GO_BP
Cluster1	spermatid differentiation	1	36	1	254	7.06	0.142	Q8K4E0	GO_BP
Cluster1	spermatogenesis	2	36	3	254	4.7	0.0535	Q6P1G2 Q8K4E0	GO_BP
Cluster1	spindle organization	1	36	3	254	2.35	0.369	Q8R1Q8	GO_BP
Cluster1	spleen development	1	36	3	254	2.35	0.369	Q0VBL3	GO_BP
Cluster1	stem cell development	2	36	5	254	2.82	0.148	E9Q5F9 O08784	GO_BP
Cluster1	stem cell differentiation	2	36	5	254	2.82	0.148	E9Q5F9 O08784	GO_BP
Cluster1	stem cell population maintenance	2	36	9	254	1.57	0.373	Q8K2T8 Q9R0L6	GO_BP
Cluster1	sterol homeostasis	1	36	1	254	7.06	0.142	Q8K4E0	GO_BP
Cluster1	stress-activated MAPK cascade	2	36	7	254	2.02	0.26	O35625 Q61083	GO_BP
Cluster1	stress-activated protein kinase signaling cascade	3	36	10	254	2.12	0.155	O35625 Q61083 Q8BTW9	GO_BP
Cluster1	supramolecular fiber organization	2	36	9	254	1.57	0.373	O35625 Q9R0L6	GO_BP
Cluster1	system development	11	36	74	254	1.05	0.49	E9Q5F9 O08784 O35625 Q0VBL3 Q62433 Q6P1G2 Q8BKG3 Q8K0F1 Q8K4E0 Q924A2 Q9R0L6	GO_BP
Cluster1	system process	4	36	18	254	1.57	0.24	O35625 Q8K4E0 Q924A2 Q9Z0U1	GO_BP
Cluster1	telencephalon development	1	36	5	254	1.41	0.537	Q6P1G2	GO_BP
Cluster1	telomere maintenance	1	36	3	254	2.35	0.369	P33611	GO_BP
Cluster1	telomere organization	1	36	3	254	2.35	0.369	P33611	GO_BP
Cluster1	third ventricle development	1	36	1	254	7.06	0.142	Q6P1G2	GO_BP
Cluster1	thrombopoietin-mediated signaling pathway	1	36	1	254	7.06	0.142	Q0VBL3	GO_BP
Cluster1	tissue development	9	36	41	254	1.55	0.0978	E9Q5F9 O08784 O35625 Q0VBL3 Q6P1G2 Q8BKG3 Q8K2T8 Q8K4E0 Q9Z0U1	GO_BP
Cluster1	tissue morphogenesis	6	36	19	254	2.23	0.036	E9Q5F9 O35625 Q0VBL3 Q6P1G2 Q8BKG3 Q8K4E0	GO_BP
Cluster1	TNFSF11-mediated signaling pathway	1	36	1	254	7.06	0.142	Q9Z0U1	GO_BP
Cluster1	transcription by RNA polymerase I	1	36	2	254	3.53	0.264	O08784	GO_BP
Cluster1	transcription by RNA polymerase II	2	36	19	254	0.74	0.785	E9Q5F9 Q8K2T8	GO_BP
Cluster1	transcription, DNA-templated	4	36	26	254	1.09	0.52	E9Q5F9 O08784 P57776 Q8K2T8	GO_BP
Cluster1	transition metal ion homeostasis	2	36	2	254	7.06	0.0196	P09528 Q6P5F6	GO_BP
Cluster1	transition metal ion transport	2	36	3	254	4.7	0.0535	P09528 Q6P5F6	GO_BP
Cluster1	translation	4	36	7	254	4.03	0.00881	P62751 Q99MN1 Q99PL5 Q9CR57	GO_BP
Cluster1	translational initiation	1	36	4	254	1.76	0.46	P62751	GO_BP
Cluster1	transmembrane transport	1	36	9	254	0.78	0.753	Q6P5F6	GO_BP
Cluster1	transport	12	36	63	254	1.34	0.143	O35625 P09528 P33611 P62751 Q52KI8 Q6P5F6 Q8K0F1 Q8K4E0 Q8R0F5 Q8R1Q8 Q9R0L6 Q9Z0U1	GO_BP
Cluster1	transport along microtubule	1	36	4	254	1.76	0.46	Q9R0L6	GO_BP
Cluster1	tRNA aminoacylation	1	36	1	254	7.06	0.142	Q99MN1	GO_BP
Cluster1	tRNA aminoacylation for protein translation	1	36	1	254	7.06	0.142	Q99MN1	GO_BP
Cluster1	tRNA metabolic process	1	36	3	254	2.35	0.369	Q99MN1	GO_BP
Cluster1	tRNA processing	1	36	3	254	2.35	0.369	Q99MN1	GO_BP
Cluster1	tube closure	3	36	7	254	3.02	0.0613	E9Q5F9 Q6P1G2 Q8BKG3	GO_BP
Cluster1	tube development	5	36	20	254	1.76	0.134	E9Q5F9 Q0VBL3 Q6P1G2 Q8BKG3 Q924A2	GO_BP
Cluster1	tube formation	3	36	9	254	2.35	0.12	E9Q5F9 Q6P1G2 Q8BKG3	GO_BP
Cluster1	tube morphogenesis	4	36	17	254	1.66	0.207	E9Q5F9 Q0VBL3 Q6P1G2 Q8BKG3	GO_BP
Cluster1	tumor necrosis factor-mediated signaling pathway	2	36	4	254	3.53	0.0975	Q99MN1 Q9Z0U1	GO_BP
Cluster1	vasculature development	3	36	11	254	1.92	0.193	E9Q5F9 Q0VBL3 Q8BKG3	GO_BP
Cluster1	vasculogenesis	1	36	3	254	2.35	0.369	E9Q5F9	GO_BP
Cluster1	ventricular septum development	2	36	5	254	2.82	0.148	Q0VBL3 Q8BKG3	GO_BP
Cluster1	ventricular septum morphogenesis	1	36	2	254	3.53	0.264	Q0VBL3	GO_BP
Cluster1	ventricular system development	1	36	1	254	7.06	0.142	Q6P1G2	GO_BP
Cluster1	very-low-density lipoprotein particle assembly	1	36	1	254	7.06	0.142	P09103	GO_BP
Cluster1	vesicle-mediated transport	3	36	30	254	0.71	0.835	Q8K0F1 Q8K4E0 Q8R1Q8	GO_BP
Cluster1	Wnt signaling pathway	3	36	6	254	3.53	0.0388	O35625 Q8BKG3 Q8BKI2	GO_BP
Cluster1	Wnt signaling pathway, calcium modulating pathway	1	36	2	254	3.53	0.264	Q8BKI2	GO_BP
Cluster1	wound healing	1	36	10	254	0.71	0.79	Q8BKG3	GO_BP
Cluster1	zinc ion homeostasis	1	36	1	254	7.06	0.142	Q6P5F6	GO_BP
Cluster1	zinc ion import across plasma membrane	1	36	1	254	7.06	0.142	Q6P5F6	GO_BP
Cluster1	zinc ion transmembrane transport	1	36	1	254	7.06	0.142	Q6P5F6	GO_BP
Cluster1	zinc ion transport	1	36	1	254	7.06	0.142	Q6P5F6	GO_BP
Cluster2	7-methylguanosine mRNA capping	1	47	2	254	2.7	0.336	Q3UYV9	GO_BP
Cluster2	7-methylguanosine RNA capping	1	47	2	254	2.7	0.336	Q3UYV9	GO_BP
Cluster2	activation of immune response	3	47	7	254	2.32	0.12	Q6PD21 Q8BUR4 Q8VIJ6	GO_BP
Cluster2	activation of innate immune response	1	47	2	254	2.7	0.336	Q8VIJ6	GO_BP
Cluster2	adaptive immune response	1	47	2	254	2.7	0.336	Q9Z0F8	GO_BP
Cluster2	adherens junction assembly	2	47	3	254	3.6	0.0889	E9Q9R9 Q69Z38	GO_BP
Cluster2	adherens junction maintenance	1	47	1	254	5.4	0.185	Q9QZQ1	GO_BP
Cluster2	adherens junction organization	3	47	4	254	4.05	0.0209	E9Q9R9 Q69Z38 Q9QZQ1	GO_BP
Cluster2	adipose tissue development	1	47	1	254	5.4	0.185	A2AAY5	GO_BP
Cluster2	alternative mRNA splicing, via spliceosome	3	47	5	254	3.24	0.0454	O70133 Q8VIJ6 Q9D0E1	GO_BP
Cluster2	alveolar secondary septum development	1	47	1	254	5.4	0.185	Q61851	GO_BP
Cluster2	amide biosynthetic process	1	47	8	254	0.68	0.81	Q05D44	GO_BP
Cluster2	amide transport	4	47	24	254	0.9	0.685	P62821 Q3UYV9 Q9D824 Q9JKK1	GO_BP
Cluster2	anatomical structure development	20	47	92	254	1.17	0.202	A2AAY5 E9Q9R9 F8VPU2 O08784 O09000 P62821 P97868 Q03172 Q3UH06 Q61122 Q61851 Q69Z38 Q6PD21 Q8BUR4 Q924A2 Q9ES00 Q9QZQ1 Q9R0L6 Q9Z0F8 Q9Z0U1	GO_BP
Cluster2	anatomical structure maturation	1	47	1	254	5.4	0.185	Q61851	GO_BP
Cluster2	anatomical structure morphogenesis	13	47	52	254	1.35	0.126	A2AAY5 E9Q9R9 F8VPU2 O08784 O09000 P62821 Q61122 Q61851 Q69Z38 Q6PD21 Q9ES00 Q9QZQ1 Q9Z0F8	GO_BP
Cluster2	androgen receptor signaling pathway	3	47	4	254	4.05	0.0209	O09000 Q569Z6 Q8VCD5	GO_BP
Cluster2	animal organ development	14	47	59	254	1.28	0.161	A2AAY5 E9Q9R9 O08784 O09000 P97868 Q61122 Q61851 Q6PD21 Q8BUR4 Q924A2 Q9ES00 Q9QZQ1 Q9R0L6 Q9Z0F8	GO_BP
Cluster2	animal organ maturation	1	47	1	254	5.4	0.185	Q61851	GO_BP
Cluster2	animal organ morphogenesis	7	47	23	254	1.64	0.107	A2AAY5 E9Q9R9 O09000 Q61122 Q61851 Q9ES00 Q9QZQ1	GO_BP
Cluster2	anion transmembrane transport	1	47	3	254	1.8	0.46	Q6PB70	GO_BP
Cluster2	anion transport	1	47	4	254	1.35	0.561	Q6PB70	GO_BP
Cluster2	antigen receptor-mediated signaling pathway	1	47	4	254	1.35	0.561	Q6PD21	GO_BP
Cluster2	apical junction assembly	1	47	5	254	1.08	0.644	E9Q9R9	GO_BP
Cluster2	apical protein localization	1	47	1	254	5.4	0.185	E9Q9R9	GO_BP
Cluster2	apoptotic process	4	47	16	254	1.35	0.34	Q61851 Q8BUR4 Q99K70 Q9ES00	GO_BP
Cluster2	apoptotic signaling pathway	2	47	7	254	1.54	0.382	Q61851 Q9ES00	GO_BP
Cluster2	aromatic compound biosynthetic process	12	47	36	254	1.8	0.0161	O08784 O09000 P11031 Q03172 Q3UH06 Q3UYV9 Q569Z6 Q8BVF2 Q8VCD5 Q99K70 Q9D824 Q9Z0U1	GO_BP
Cluster2	aromatic compound catabolic process	3	47	6	254	2.7	0.079	Q3UYV9 Q569Z6 Q8CJF9	GO_BP
Cluster2	autophagosome assembly	2	47	3	254	3.6	0.0889	P60521 P62821	GO_BP
Cluster2	autophagosome maturation	1	47	2	254	2.7	0.336	P60521	GO_BP
Cluster2	autophagosome organization	2	47	3	254	3.6	0.0889	P60521 P62821	GO_BP
Cluster2	autophagy	2	47	7	254	1.54	0.382	P60521 P62821	GO_BP
Cluster2	autophagy of mitochondrion	1	47	3	254	1.8	0.46	P60521	GO_BP
Cluster2	axon development	1	47	12	254	0.45	0.919	Q61851	GO_BP
Cluster2	axon ensheathment	2	47	4	254	2.7	0.157	Q61122 Q61851	GO_BP
Cluster2	axon ensheathment in central nervous system	1	47	1	254	5.4	0.185	Q61851	GO_BP
Cluster2	axonogenesis	1	47	11	254	0.49	0.9	Q61851	GO_BP
Cluster2	axonogenesis involved in innervation	1	47	1	254	5.4	0.185	Q61851	GO_BP
Cluster2	B cell activation	2	47	4	254	2.7	0.157	Q6PD21 Q9Z0F8	GO_BP
Cluster2	B cell differentiation	1	47	3	254	1.8	0.46	Q9Z0F8	GO_BP
Cluster2	B cell proliferation	1	47	1	254	5.4	0.185	Q6PD21	GO_BP
Cluster2	behavior	2	47	7	254	1.54	0.382	Q924A2 Q9R0L6	GO_BP
Cluster2	bile acid biosynthetic process	1	47	1	254	5.4	0.185	Q9DBS9	GO_BP
Cluster2	bile acid metabolic process	1	47	1	254	5.4	0.185	Q9DBS9	GO_BP
Cluster2	biological adhesion	5	47	15	254	1.8	0.121	E9Q9R9 P62821 Q69Z38 Q9QZQ1 Q9Z0F8	GO_BP
Cluster2	biological regulation	39	47	203	254	1.04	0.361	A2AAY5 A2ALK8 E9Q9R9 F8VPU2 O08784 O09000 O70133 P11031 P60521 P62821 P97868 Q03172 Q05D44 Q3U5F4 Q3UH06 Q3UYV9 Q569Z6 Q61122 Q61851 Q69Z38 Q6NVE8 Q6P9S1 Q6PD21 Q6PGG6 Q8BUR4 Q8BVF2 Q8CJF9 Q8R4Z4 Q8VCD5 Q8VIJ6 Q924A2 Q99K70 Q9D0E1 Q9ES00 Q9JKK1 Q9QZQ1 Q9R0L6 Q9Z0F8 Q9Z0U1	GO_BP
Cluster2	biomineral tissue development	1	47	1	254	5.4	0.185	Q61851	GO_BP
Cluster2	biosynthetic process	16	47	50	254	1.73	0.0074	O08784 O09000 P11031 Q03172 Q05D44 Q3UH06 Q3UYV9 Q569Z6 Q61851 Q8BVF2 Q8VCD5 Q8VDZ4 Q99K70 Q9D824 Q9DBS9 Q9Z0U1	GO_BP
Cluster2	blood coagulation	1	47	4	254	1.35	0.561	Q8BUR4	GO_BP
Cluster2	blood vessel development	1	47	11	254	0.49	0.9	Q6PD21	GO_BP
Cluster2	blood vessel morphogenesis	1	47	6	254	0.9	0.711	Q6PD21	GO_BP
Cluster2	bone development	3	47	3	254	5.4	0.00601	A2AAY5 Q61122 Q61851	GO_BP
Cluster2	bone growth	1	47	1	254	5.4	0.185	Q61851	GO_BP
Cluster2	bone maturation	1	47	1	254	5.4	0.185	Q61851	GO_BP
Cluster2	bone mineralization	1	47	1	254	5.4	0.185	Q61851	GO_BP
Cluster2	bone morphogenesis	2	47	2	254	5.4	0.0336	Q61122 Q61851	GO_BP
Cluster2	bone trabecula morphogenesis	1	47	1	254	5.4	0.185	Q61851	GO_BP
Cluster2	brain development	5	47	22	254	1.23	0.385	E9Q9R9 Q61851 Q924A2 Q9QZQ1 Q9R0L6	GO_BP
Cluster2	brain morphogenesis	1	47	2	254	2.7	0.336	Q9QZQ1	GO_BP
Cluster2	branching morphogenesis of an epithelial tube	2	47	3	254	3.6	0.0889	E9Q9R9 O09000	GO_BP
Cluster2	camera-type eye development	1	47	6	254	0.9	0.711	Q61851	GO_BP
Cluster2	camera-type eye morphogenesis	1	47	4	254	1.35	0.561	Q61851	GO_BP
Cluster2	carbohydrate derivative biosynthetic process	1	47	3	254	1.8	0.46	Q8BVF2	GO_BP
Cluster2	carbohydrate derivative metabolic process	2	47	7	254	1.54	0.382	Q8BVF2 Q9Z0U1	GO_BP
Cluster2	carboxylic acid biosynthetic process	1	47	4	254	1.35	0.561	Q9DBS9	GO_BP
Cluster2	carboxylic acid metabolic process	1	47	9	254	0.6	0.847	Q9DBS9	GO_BP
Cluster2	cardiac chamber development	1	47	8	254	0.68	0.81	Q9ES00	GO_BP
Cluster2	cardiac chamber morphogenesis	1	47	4	254	1.35	0.561	Q9ES00	GO_BP
Cluster2	cardiac muscle tissue development	1	47	3	254	1.8	0.46	Q9ES00	GO_BP
Cluster2	cardiac muscle tissue morphogenesis	1	47	2	254	2.7	0.336	Q9ES00	GO_BP
Cluster2	cardiac ventricle development	1	47	6	254	0.9	0.711	Q9ES00	GO_BP
Cluster2	cardiac ventricle morphogenesis	1	47	2	254	2.7	0.336	Q9ES00	GO_BP
Cluster2	cardiovascular system development	1	47	11	254	0.49	0.9	Q6PD21	GO_BP
Cluster2	cartilage development	1	47	2	254	2.7	0.336	Q61851	GO_BP
Cluster2	catabolic process	7	47	21	254	1.8	0.0687	P60521 P62821 P97868 Q3UYV9 Q569Z6 Q8CJF9 Q9ES00	GO_BP
Cluster2	cell activation	2	47	17	254	0.64	0.859	Q6PD21 Q9Z0F8	GO_BP
Cluster2	cell adhesion	5	47	15	254	1.8	0.121	E9Q9R9 P62821 Q69Z38 Q9QZQ1 Q9Z0F8	GO_BP
Cluster2	cell adhesion mediated by integrin	1	47	1	254	5.4	0.185	Q9Z0F8	GO_BP
Cluster2	cell communication	19	47	82	254	1.25	0.126	E9Q9R9 O09000 P11031 P60521 P62821 Q03172 Q3UH06 Q3UYV9 Q569Z6 Q61851 Q6PD21 Q8BUR4 Q8CJF9 Q8VCD5 Q99K70 Q9ES00 Q9QZQ1 Q9Z0F8 Q9Z0U1	GO_BP
Cluster2	cell cycle	2	47	24	254	0.45	0.96	Q99K70 Q9R0L6	GO_BP
Cluster2	cell cycle arrest	1	47	5	254	1.08	0.644	Q99K70	GO_BP
Cluster2	cell cycle G2/M phase transition	1	47	4	254	1.35	0.561	Q9R0L6	GO_BP
Cluster2	cell cycle phase transition	1	47	8	254	0.68	0.81	Q9R0L6	GO_BP
Cluster2	cell cycle process	2	47	22	254	0.49	0.942	Q99K70 Q9R0L6	GO_BP
Cluster2	cell death	5	47	18	254	1.5	0.223	O70133 Q61851 Q8BUR4 Q99K70 Q9ES00	GO_BP
Cluster2	cell dedifferentiation	1	47	1	254	5.4	0.185	O09000	GO_BP
Cluster2	cell development	8	47	32	254	1.35	0.216	F8VPU2 O08784 P62821 Q61851 Q69Z38 Q9ES00 Q9QZQ1 Q9Z0U1	GO_BP
Cluster2	cell differentiation	15	47	68	254	1.19	0.239	A2AAY5 E9Q9R9 F8VPU2 O08784 P62821 Q61122 Q61851 Q69Z38 Q8BUR4 Q8R4Z4 Q9ES00 Q9QZQ1 Q9R0L6 Q9Z0F8 Q9Z0U1	GO_BP
Cluster2	cell fate commitment	2	47	7	254	1.54	0.382	A2AAY5 Q61851	GO_BP
Cluster2	cell growth	1	47	1	254	5.4	0.185	Q99K70	GO_BP
Cluster2	cell junction assembly	2	47	7	254	1.54	0.382	E9Q9R9 Q69Z38	GO_BP
Cluster2	cell junction maintenance	1	47	1	254	5.4	0.185	Q9QZQ1	GO_BP
Cluster2	cell junction organization	3	47	8	254	2.03	0.168	E9Q9R9 Q69Z38 Q9QZQ1	GO_BP
Cluster2	cell migration	5	47	19	254	1.42	0.261	P62821 Q69Z38 Q8BUR4 Q9R0L6 Q9Z0F8	GO_BP
Cluster2	cell morphogenesis	4	47	19	254	1.14	0.481	F8VPU2 P62821 Q61851 Q69Z38	GO_BP
Cluster2	cell morphogenesis involved in differentiation	4	47	17	254	1.27	0.388	F8VPU2 P62821 Q61851 Q69Z38	GO_BP
Cluster2	cell motility	5	47	19	254	1.42	0.261	P62821 Q69Z38 Q8BUR4 Q9R0L6 Q9Z0F8	GO_BP
Cluster2	cell part morphogenesis	2	47	14	254	0.77	0.77	F8VPU2 Q61851	GO_BP
Cluster2	cell population proliferation	3	47	20	254	0.81	0.755	Q61851 Q6PD21 Q9R0L6	GO_BP
Cluster2	cell projection assembly	2	47	8	254	1.35	0.454	Q6P9S1 Q9R0L6	GO_BP
Cluster2	cell projection morphogenesis	2	47	13	254	0.83	0.731	F8VPU2 Q61851	GO_BP
Cluster2	cell projection organization	5	47	28	254	0.97	0.622	F8VPU2 Q61851 Q6P9S1 Q9ES00 Q9R0L6	GO_BP
Cluster2	cell proliferation in forebrain	1	47	3	254	1.8	0.46	Q9R0L6	GO_BP
Cluster2	cell surface receptor signaling pathway	8	47	37	254	1.17	0.371	P11031 Q3UYV9 Q61851 Q6PD21 Q8BUR4 Q8CJF9 Q9Z0F8 Q9Z0U1	GO_BP
Cluster2	cell-cell adhesion	1	47	7	254	0.77	0.766	E9Q9R9	GO_BP
Cluster2	cell-cell junction assembly	1	47	5	254	1.08	0.644	E9Q9R9	GO_BP
Cluster2	cell-cell junction organization	3	47	8	254	2.03	0.168	E9Q9R9 Q69Z38 Q9QZQ1	GO_BP
Cluster2	cell-cell signaling	4	47	14	254	1.54	0.247	P62821 Q61851 Q8CJF9 Q9QZQ1	GO_BP
Cluster2	cell-cell signaling by wnt	1	47	6	254	0.9	0.711	Q8CJF9	GO_BP
Cluster2	cell-matrix adhesion	1	47	3	254	1.8	0.46	Q69Z38	GO_BP
Cluster2	cell-substrate adhesion	2	47	5	254	2.16	0.231	P62821 Q69Z38	GO_BP
Cluster2	cell-substrate junction assembly	1	47	2	254	2.7	0.336	Q69Z38	GO_BP
Cluster2	cellular amide metabolic process	1	47	8	254	0.68	0.81	Q05D44	GO_BP
Cluster2	cellular aromatic compound metabolic process	20	47	76	254	1.42	0.0295	O08784 O09000 O70133 P11031 Q03172 Q3U5F4 Q3UH06 Q3UYV9 Q569Z6 Q6NV83 Q7TNC4 Q8BTI8 Q8BVF2 Q8CJF9 Q8VCD5 Q8VIJ6 Q99K70 Q9D0E1 Q9D824 Q9Z0U1	GO_BP
Cluster2	cellular biosynthetic process	16	47	50	254	1.73	0.0074	O08784 O09000 P11031 Q03172 Q05D44 Q3UH06 Q3UYV9 Q569Z6 Q61851 Q8BVF2 Q8VCD5 Q8VDZ4 Q99K70 Q9D824 Q9DBS9 Q9Z0U1	GO_BP
Cluster2	cellular catabolic process	7	47	20	254	1.89	0.0534	P60521 P62821 P97868 Q3UYV9 Q569Z6 Q8CJF9 Q9ES00	GO_BP
Cluster2	cellular component assembly	12	47	49	254	1.32	0.159	A2AAY5 E9Q9R9 F8VPU2 O70133 P60521 P62821 Q3UYV9 Q69Z38 Q6P9S1 Q7TNC4 Q8CJF9 Q9R0L6	GO_BP
Cluster2	cellular component biogenesis	13	47	55	254	1.28	0.18	A2AAY5 E9Q9R9 F8VPU2 O70133 P60521 P62821 Q3UYV9 Q69Z38 Q6P9S1 Q6PGG6 Q7TNC4 Q8CJF9 Q9R0L6	GO_BP
Cluster2	cellular component disassembly	2	47	8	254	1.35	0.454	A2AAY5 P60521	GO_BP
Cluster2	cellular component maintenance	1	47	1	254	5.4	0.185	Q9QZQ1	GO_BP
Cluster2	cellular component morphogenesis	4	47	21	254	1.03	0.569	F8VPU2 P62821 Q61851 Q69Z38	GO_BP
Cluster2	cellular component organization	20	47	112	254	0.97	0.653	A2AAY5 A2AJI0 E9Q9R9 F8VPU2 O09000 O70133 P60521 P62821 Q3UYV9 Q61851 Q69Z38 Q6P9S1 Q7TNC4 Q8BUR4 Q8CJF9 Q8VIJ6 Q9ES00 Q9JKK1 Q9QZQ1 Q9R0L6	GO_BP
Cluster2	cellular component organization or biogenesis	21	47	115	254	0.99	0.599	A2AAY5 A2AJI0 E9Q9R9 F8VPU2 O09000 O70133 P60521 P62821 Q3UYV9 Q61851 Q69Z38 Q6P9S1 Q6PGG6 Q7TNC4 Q8BUR4 Q8CJF9 Q8VIJ6 Q9ES00 Q9JKK1 Q9QZQ1 Q9R0L6	GO_BP
Cluster2	cellular developmental process	16	47	73	254	1.18	0.236	A2AAY5 E9Q9R9 F8VPU2 O08784 O09000 P62821 Q61122 Q61851 Q69Z38 Q8BUR4 Q8R4Z4 Q9ES00 Q9QZQ1 Q9R0L6 Q9Z0F8 Q9Z0U1	GO_BP
Cluster2	cellular lipid metabolic process	1	47	6	254	0.9	0.711	Q61851	GO_BP
Cluster2	cellular localization	8	47	55	254	0.79	0.854	A2AAY5 O70133 P62821 Q3UYV9 Q99K70 Q9D824 Q9JKK1 Q9R0L6	GO_BP
Cluster2	cellular macromolecule biosynthetic process	12	47	40	254	1.62	0.039	O08784 O09000 P11031 Q03172 Q05D44 Q3UH06 Q3UYV9 Q569Z6 Q8VCD5 Q8VDZ4 Q99K70 Q9D824	GO_BP
Cluster2	cellular macromolecule catabolic process	5	47	12	254	2.25	0.05	P97868 Q3UYV9 Q569Z6 Q8CJF9 Q9ES00	GO_BP
Cluster2	cellular macromolecule localization	8	47	33	254	1.31	0.245	A2AAY5 O70133 P62821 Q3UYV9 Q99K70 Q9D824 Q9JKK1 Q9R0L6	GO_BP
Cluster2	cellular macromolecule metabolic process	22	47	102	254	1.17	0.193	A2ALK8 O08784 O09000 P11031 P62821 P97868 Q03172 Q05D44 Q3UH06 Q3UYV9 Q569Z6 Q61851 Q69Z38 Q6PB70 Q8CJF9 Q8VCD5 Q8VDZ4 Q8VIJ6 Q99K70 Q9D824 Q9ES00 Q9Z0F8	GO_BP
Cluster2	cellular metabolic process	33	47	137	254	1.3	0.00957	A2AAY5 A2ALK8 O08784 O09000 O70133 P11031 P60521 P62821 P97868 Q03172 Q05D44 Q3U5F4 Q3UH06 Q3UYV9 Q569Z6 Q61851 Q69Z38 Q6NV83 Q6PB70 Q7TNC4 Q8BTI8 Q8BVF2 Q8CJF9 Q8VCD5 Q8VDZ4 Q8VIJ6 Q99K70 Q9D0E1 Q9D824 Q9DBS9 Q9ES00 Q9Z0F8 Q9Z0U1	GO_BP
Cluster2	cellular nitrogen compound biosynthetic process	13	47	42	254	1.67	0.0237	O08784 O09000 P11031 Q03172 Q05D44 Q3UH06 Q3UYV9 Q569Z6 Q8BVF2 Q8VCD5 Q99K70 Q9D824 Q9Z0U1	GO_BP
Cluster2	cellular nitrogen compound catabolic process	3	47	6	254	2.7	0.079	Q3UYV9 Q569Z6 Q8CJF9	GO_BP
Cluster2	cellular nitrogen compound metabolic process	21	47	79	254	1.44	0.0217	O08784 O09000 O70133 P11031 Q03172 Q05D44 Q3U5F4 Q3UH06 Q3UYV9 Q569Z6 Q6NV83 Q7TNC4 Q8BTI8 Q8BVF2 Q8CJF9 Q8VCD5 Q8VIJ6 Q99K70 Q9D0E1 Q9D824 Q9Z0U1	GO_BP
Cluster2	cellular pigmentation	1	47	1	254	5.4	0.185	P62821	GO_BP
Cluster2	cellular process	44	47	221	254	1.08	0.1	A2AAY5 A2AJI0 A2ALK8 E9Q9R9 F8VPU2 O08784 O09000 O70133 P11031 P60521 P62821 P97868 Q03172 Q05D44 Q3U5F4 Q3UH06 Q3UYV9 Q569Z6 Q61122 Q61851 Q69Z38 Q6NV83 Q6P9S1 Q6PB70 Q6PD21 Q7TNC4 Q8BTI8 Q8BUR4 Q8BVF2 Q8CJF9 Q8R4Z4 Q8VCD5 Q8VDZ4 Q8VIJ6 Q99K70 Q9D0E1 Q9D824 Q9DBS9 Q9ES00 Q9JKK1 Q9QZQ1 Q9R0L6 Q9Z0F8 Q9Z0U1	GO_BP
Cluster2	cellular protein catabolic process	2	47	6	254	1.8	0.308	P97868 Q9ES00	GO_BP
Cluster2	cellular protein localization	8	47	33	254	1.31	0.245	A2AAY5 O70133 P62821 Q3UYV9 Q99K70 Q9D824 Q9JKK1 Q9R0L6	GO_BP
Cluster2	cellular protein metabolic process	13	47	71	254	0.99	0.584	A2ALK8 O09000 P62821 P97868 Q05D44 Q61851 Q69Z38 Q6PB70 Q8VCD5 Q8VDZ4 Q8VIJ6 Q9ES00 Q9Z0F8	GO_BP
Cluster2	cellular protein modification process	11	47	62	254	0.96	0.636	A2ALK8 O09000 P62821 P97868 Q61851 Q69Z38 Q6PB70 Q8VCD5 Q8VDZ4 Q8VIJ6 Q9ES00	GO_BP
Cluster2	cellular protein-containing complex assembly	5	47	17	254	1.59	0.186	O70133 P62821 Q3UYV9 Q7TNC4 Q8CJF9	GO_BP
Cluster2	cellular response to acid chemical	1	47	2	254	2.7	0.336	Q99K70	GO_BP
Cluster2	cellular response to amino acid starvation	1	47	3	254	1.8	0.46	Q99K70	GO_BP
Cluster2	cellular response to amino acid stimulus	1	47	1	254	5.4	0.185	Q99K70	GO_BP
Cluster2	cellular response to biotic stimulus	1	47	6	254	0.9	0.711	Q9D0E1	GO_BP
Cluster2	cellular response to carcinoembryonic antigen	1	47	1	254	5.4	0.185	Q9D0E1	GO_BP
Cluster2	cellular response to chemical stimulus	12	47	52	254	1.25	0.223	O09000 O70133 Q3UYV9 Q569Z6 Q61851 Q8CJF9 Q8R4Z4 Q8VCD5 Q99K70 Q9D0E1 Q9Z0F8 Q9Z0U1	GO_BP
Cluster2	cellular response to cytokine stimulus	4	47	16	254	1.35	0.34	O70133 Q8R4Z4 Q9Z0F8 Q9Z0U1	GO_BP
Cluster2	cellular response to DNA damage stimulus	2	47	16	254	0.68	0.834	P97868 Q8VIJ6	GO_BP
Cluster2	cellular response to dsRNA	3	47	4	254	4.05	0.0209	O70133 Q3UYV9 Q8CJF9	GO_BP
Cluster2	cellular response to endogenous stimulus	7	47	26	254	1.45	0.181	O09000 Q3UYV9 Q569Z6 Q61851 Q8VCD5 Q99K70 Q9D0E1	GO_BP
Cluster2	cellular response to estradiol stimulus	1	47	1	254	5.4	0.185	O09000	GO_BP
Cluster2	cellular response to exogenous dsRNA	1	47	1	254	5.4	0.185	O70133	GO_BP
Cluster2	cellular response to external stimulus	2	47	10	254	1.08	0.582	P60521 Q99K70	GO_BP
Cluster2	cellular response to extracellular stimulus	2	47	8	254	1.35	0.454	P60521 Q99K70	GO_BP
Cluster2	cellular response to glycoprotein	1	47	1	254	5.4	0.185	Q9D0E1	GO_BP
Cluster2	cellular response to growth factor stimulus	2	47	12	254	0.9	0.687	Q3UYV9 Q61851	GO_BP
Cluster2	cellular response to heat	1	47	1	254	5.4	0.185	O70133	GO_BP
Cluster2	cellular response to hormone stimulus	3	47	14	254	1.16	0.498	O09000 Q569Z6 Q8VCD5	GO_BP
Cluster2	cellular response to lipid	4	47	13	254	1.66	0.204	O09000 Q569Z6 Q8VCD5 Q9D0E1	GO_BP
Cluster2	cellular response to lipopolysaccharide	1	47	6	254	0.9	0.711	Q9D0E1	GO_BP
Cluster2	cellular response to lipoprotein particle stimulus	1	47	1	254	5.4	0.185	Q9Z0F8	GO_BP
Cluster2	cellular response to molecule of bacterial origin	1	47	6	254	0.9	0.711	Q9D0E1	GO_BP
Cluster2	cellular response to nitrogen compound	5	47	16	254	1.69	0.152	O70133 Q3UYV9 Q8CJF9 Q99K70 Q9D0E1	GO_BP
Cluster2	cellular response to nitrogen levels	1	47	1	254	5.4	0.185	P60521	GO_BP
Cluster2	cellular response to nitrogen starvation	1	47	1	254	5.4	0.185	P60521	GO_BP
Cluster2	cellular response to nutrient levels	2	47	7	254	1.54	0.382	P60521 Q99K70	GO_BP
Cluster2	cellular response to organic cyclic compound	6	47	13	254	2.49	0.018	O09000 O70133 Q3UYV9 Q569Z6 Q8CJF9 Q8VCD5	GO_BP
Cluster2	cellular response to organic substance	12	47	43	254	1.51	0.0673	O09000 O70133 Q3UYV9 Q569Z6 Q61851 Q8CJF9 Q8R4Z4 Q8VCD5 Q99K70 Q9D0E1 Q9Z0F8 Q9Z0U1	GO_BP
Cluster2	cellular response to organonitrogen compound	2	47	12	254	0.9	0.687	Q99K70 Q9D0E1	GO_BP
Cluster2	cellular response to oxygen-containing compound	3	47	20	254	0.81	0.755	O09000 Q99K70 Q9D0E1	GO_BP
Cluster2	cellular response to starvation	2	47	6	254	1.8	0.308	P60521 Q99K70	GO_BP
Cluster2	cellular response to steroid hormone stimulus	3	47	6	254	2.7	0.079	O09000 Q569Z6 Q8VCD5	GO_BP
Cluster2	cellular response to stimulus	23	47	112	254	1.11	0.281	E9Q9R9 O09000 O70133 P11031 P60521 P97868 Q03172 Q3UH06 Q3UYV9 Q569Z6 Q61851 Q6PD21 Q8BUR4 Q8CJF9 Q8R4Z4 Q8VCD5 Q8VIJ6 Q99K70 Q9D0E1 Q9ES00 Q9QZQ1 Q9Z0F8 Q9Z0U1	GO_BP
Cluster2	cellular response to stress	7	47	40	254	0.95	0.645	O70133 P60521 P97868 Q61851 Q8VIJ6 Q99K70 Q9ES00	GO_BP
Cluster2	cellular response to tumor necrosis factor	3	47	8	254	2.03	0.168	O70133 Q9Z0F8 Q9Z0U1	GO_BP
Cluster2	central nervous system development	5	47	25	254	1.08	0.508	E9Q9R9 Q61851 Q924A2 Q9QZQ1 Q9R0L6	GO_BP
Cluster2	central nervous system myelination	1	47	1	254	5.4	0.185	Q61851	GO_BP
Cluster2	centrosome cycle	1	47	2	254	2.7	0.336	Q9R0L6	GO_BP
Cluster2	cerebral cortex development	1	47	3	254	1.8	0.46	Q9QZQ1	GO_BP
Cluster2	chemical homeostasis	1	47	17	254	0.32	0.973	A2ALK8	GO_BP
Cluster2	chloride transmembrane transport	1	47	3	254	1.8	0.46	Q6PB70	GO_BP
Cluster2	chloride transport	1	47	3	254	1.8	0.46	Q6PB70	GO_BP
Cluster2	chondrocyte differentiation	1	47	1	254	5.4	0.185	Q61851	GO_BP
Cluster2	chondrocyte proliferation	1	47	1	254	5.4	0.185	Q61851	GO_BP
Cluster2	chordate embryonic development	3	47	25	254	0.65	0.88	O08784 O09000 P97868	GO_BP
Cluster2	chromatin organization	2	47	16	254	0.68	0.834	O09000 Q8VIJ6	GO_BP
Cluster2	chromosome organization	3	47	25	254	0.65	0.88	O09000 O70133 Q8VIJ6	GO_BP
Cluster2	ciliary basal body-plasma membrane docking	1	47	4	254	1.35	0.561	Q9R0L6	GO_BP
Cluster2	cilium assembly	2	47	6	254	1.8	0.308	Q6P9S1 Q9R0L6	GO_BP
Cluster2	cilium organization	2	47	6	254	1.8	0.308	Q6P9S1 Q9R0L6	GO_BP
Cluster2	circadian rhythm	2	47	7	254	1.54	0.382	O70133 Q569Z6	GO_BP
Cluster2	circulatory system development	3	47	20	254	0.81	0.755	A2AAY5 Q6PD21 Q9ES00	GO_BP
Cluster2	coagulation	1	47	4	254	1.35	0.561	Q8BUR4	GO_BP
Cluster2	cochlea development	1	47	3	254	1.8	0.46	Q61851	GO_BP
Cluster2	cognition	1	47	4	254	1.35	0.561	Q924A2	GO_BP
Cluster2	collecting duct development	1	47	1	254	5.4	0.185	E9Q9R9	GO_BP
Cluster2	columnar/cuboidal epithelial cell differentiation	1	47	2	254	2.7	0.336	Q9QZQ1	GO_BP
Cluster2	connective tissue development	2	47	3	254	3.6	0.0889	A2AAY5 Q61851	GO_BP
Cluster2	COPII vesicle coating	1	47	1	254	5.4	0.185	P62821	GO_BP
Cluster2	COPII-coated vesicle budding	1	47	1	254	5.4	0.185	P62821	GO_BP
Cluster2	COPII-coated vesicle cargo loading	1	47	1	254	5.4	0.185	P62821	GO_BP
Cluster2	covalent chromatin modification	2	47	13	254	0.83	0.731	O09000 Q8VIJ6	GO_BP
Cluster2	cranial skeletal system development	1	47	2	254	2.7	0.336	A2AAY5	GO_BP
Cluster2	CRD-mediated mRNA stabilization	1	47	2	254	2.7	0.336	O70133	GO_BP
Cluster2	cytokine production	1	47	1	254	5.4	0.185	P62821	GO_BP
Cluster2	cytokine secretion	1	47	1	254	5.4	0.185	P62821	GO_BP
Cluster2	cytokine-mediated signaling pathway	2	47	9	254	1.2	0.52	Q9Z0F8 Q9Z0U1	GO_BP
Cluster2	cytoplasmic microtubule organization	1	47	2	254	2.7	0.336	Q9R0L6	GO_BP
Cluster2	cytoskeleton organization	2	47	29	254	0.37	0.985	A2AJI0 Q9R0L6	GO_BP
Cluster2	cytoskeleton-dependent intracellular transport	2	47	4	254	2.7	0.157	P62821 Q9R0L6	GO_BP
Cluster2	cytosolic transport	1	47	6	254	0.9	0.711	Q9JKK1	GO_BP
Cluster2	dedifferentiation	1	47	1	254	5.4	0.185	O09000	GO_BP
Cluster2	defense response	2	47	7	254	1.54	0.382	P62821 Q9Z0F8	GO_BP
Cluster2	defense response to bacterium	2	47	3	254	3.6	0.0889	P62821 Q9Z0F8	GO_BP
Cluster2	defense response to Gram-positive bacterium	1	47	1	254	5.4	0.185	Q9Z0F8	GO_BP
Cluster2	defense response to other organism	2	47	4	254	2.7	0.157	P62821 Q9Z0F8	GO_BP
Cluster2	dendrite development	1	47	1	254	5.4	0.185	F8VPU2	GO_BP
Cluster2	dendrite morphogenesis	1	47	1	254	5.4	0.185	F8VPU2	GO_BP
Cluster2	dephosphorylation	1	47	3	254	1.8	0.46	A2ALK8	GO_BP
Cluster2	development of primary male sexual characteristics	1	47	3	254	1.8	0.46	O09000	GO_BP
Cluster2	development of primary sexual characteristics	1	47	4	254	1.35	0.561	O09000	GO_BP
Cluster2	development of secondary sexual characteristics	1	47	1	254	5.4	0.185	O09000	GO_BP
Cluster2	developmental growth	3	47	6	254	2.7	0.079	O09000 P97868 Q61851	GO_BP
Cluster2	developmental maturation	1	47	1	254	5.4	0.185	Q61851	GO_BP
Cluster2	developmental process	22	47	97	254	1.23	0.119	A2AAY5 E9Q9R9 F8VPU2 O08784 O09000 P62821 P97868 Q03172 Q3UH06 Q61122 Q61851 Q69Z38 Q6PD21 Q8BUR4 Q8R4Z4 Q8VCD5 Q924A2 Q9ES00 Q9QZQ1 Q9R0L6 Q9Z0F8 Q9Z0U1	GO_BP
Cluster2	developmental process involved in reproduction	1	47	14	254	0.39	0.948	O09000	GO_BP
Cluster2	digestion	1	47	1	254	5.4	0.185	Q9Z0U1	GO_BP
Cluster2	digestive system development	1	47	2	254	2.7	0.336	Q61851	GO_BP
Cluster2	digestive system process	1	47	1	254	5.4	0.185	Q9Z0U1	GO_BP
Cluster2	digestive tract development	1	47	2	254	2.7	0.336	Q61851	GO_BP
Cluster2	digestive tract morphogenesis	1	47	2	254	2.7	0.336	Q61851	GO_BP
Cluster2	DNA conformation change	1	47	8	254	0.68	0.81	O70133	GO_BP
Cluster2	DNA duplex unwinding	1	47	3	254	1.8	0.46	O70133	GO_BP
Cluster2	DNA geometric change	1	47	3	254	1.8	0.46	O70133	GO_BP
Cluster2	DNA metabolic process	1	47	12	254	0.45	0.919	Q8VIJ6	GO_BP
Cluster2	DNA recombination	1	47	1	254	5.4	0.185	Q8VIJ6	GO_BP
Cluster2	DNA repair	1	47	8	254	0.68	0.81	Q8VIJ6	GO_BP
Cluster2	DNA-templated transcription, elongation	1	47	4	254	1.35	0.561	Q3UYV9	GO_BP
Cluster2	DNA-templated transcription, initiation	2	47	3	254	3.6	0.0889	Q569Z6 Q8VCD5	GO_BP
Cluster2	DNA-templated transcription, termination	2	47	2	254	5.4	0.0336	Q3UYV9 Q9D824	GO_BP
Cluster2	DNA-templated viral transcription	1	47	1	254	5.4	0.185	O70133	GO_BP
Cluster2	double-strand break repair	1	47	2	254	2.7	0.336	Q8VIJ6	GO_BP
Cluster2	dsRNA processing	2	47	3	254	3.6	0.0889	Q3UYV9 Q8CJF9	GO_BP
Cluster2	ear development	1	47	8	254	0.68	0.81	Q61851	GO_BP
Cluster2	embryo development	3	47	31	254	0.52	0.954	O08784 O09000 P97868	GO_BP
Cluster2	embryo development ending in birth or egg hatching	3	47	25	254	0.65	0.88	O08784 O09000 P97868	GO_BP
Cluster2	embryonic morphogenesis	1	47	20	254	0.27	0.986	O09000	GO_BP
Cluster2	embryonic organ development	2	47	18	254	0.6	0.881	O09000 P97868	GO_BP
Cluster2	embryonic placenta development	1	47	8	254	0.68	0.81	O09000	GO_BP
Cluster2	embryonic placenta morphogenesis	1	47	3	254	1.8	0.46	O09000	GO_BP
Cluster2	endochondral bone growth	1	47	1	254	5.4	0.185	Q61851	GO_BP
Cluster2	endochondral bone morphogenesis	2	47	2	254	5.4	0.0336	Q61122 Q61851	GO_BP
Cluster2	endochondral ossification	2	47	2	254	5.4	0.0336	Q61122 Q61851	GO_BP
Cluster2	endocytic recycling	1	47	3	254	1.8	0.46	Q9JKK1	GO_BP
Cluster2	endocytosis	2	47	12	254	0.9	0.687	P62821 Q8BUR4	GO_BP
Cluster2	endomembrane system organization	2	47	5	254	2.16	0.231	P62821 Q9JKK1	GO_BP
Cluster2	endosomal transport	1	47	12	254	0.45	0.919	Q9JKK1	GO_BP
Cluster2	endosome organization	1	47	1	254	5.4	0.185	Q9JKK1	GO_BP
Cluster2	endothelial cell development	2	47	3	254	3.6	0.0889	Q9QZQ1 Q9Z0U1	GO_BP
Cluster2	endothelial cell differentiation	2	47	3	254	3.6	0.0889	Q9QZQ1 Q9Z0U1	GO_BP
Cluster2	endothelium development	2	47	3	254	3.6	0.0889	Q9QZQ1 Q9Z0U1	GO_BP
Cluster2	ensheathment of neurons	2	47	4	254	2.7	0.157	Q61122 Q61851	GO_BP
Cluster2	enzyme linked receptor protein signaling pathway	6	47	19	254	1.71	0.115	P11031 Q3UYV9 Q61851 Q6PD21 Q8BUR4 Q9Z0F8	GO_BP
Cluster2	epiboly	1	47	3	254	1.8	0.46	Q9Z0F8	GO_BP
Cluster2	epiboly involved in wound healing	1	47	3	254	1.8	0.46	Q9Z0F8	GO_BP
Cluster2	epidermal growth factor receptor signaling pathway	1	47	1	254	5.4	0.185	Q9Z0F8	GO_BP
Cluster2	epithelial cell development	3	47	7	254	2.32	0.12	Q61851 Q9QZQ1 Q9Z0U1	GO_BP
Cluster2	epithelial cell differentiation	4	47	12	254	1.8	0.162	E9Q9R9 Q61851 Q9QZQ1 Q9Z0U1	GO_BP
Cluster2	epithelial cell fate commitment	1	47	1	254	5.4	0.185	Q61851	GO_BP
Cluster2	epithelial to mesenchymal transition	2	47	4	254	2.7	0.157	E9Q9R9 O08784	GO_BP
Cluster2	epithelial tube morphogenesis	2	47	11	254	0.98	0.637	E9Q9R9 O09000	GO_BP
Cluster2	epithelium development	7	47	25	254	1.51	0.154	E9Q9R9 O09000 P97868 Q61851 Q9QZQ1 Q9Z0F8 Q9Z0U1	GO_BP
Cluster2	ERAD pathway	1	47	3	254	1.8	0.46	Q9ES00	GO_BP
Cluster2	ERBB signaling pathway	1	47	3	254	1.8	0.46	Q9Z0F8	GO_BP
Cluster2	ERK1 and ERK2 cascade	1	47	4	254	1.35	0.561	Q61851	GO_BP
Cluster2	establishment of endothelial barrier	2	47	3	254	3.6	0.0889	Q9QZQ1 Q9Z0U1	GO_BP
Cluster2	establishment of endothelial intestinal barrier	2	47	3	254	3.6	0.0889	Q9QZQ1 Q9Z0U1	GO_BP
Cluster2	establishment of localization	10	47	65	254	0.83	0.825	P60521 P62821 Q3UYV9 Q6PB70 Q8BUR4 Q9D824 Q9DBS9 Q9JKK1 Q9R0L6 Q9Z0U1	GO_BP
Cluster2	establishment of localization in cell	5	47	41	254	0.66	0.918	P62821 Q3UYV9 Q9D824 Q9JKK1 Q9R0L6	GO_BP
Cluster2	establishment of melanosome localization	1	47	1	254	5.4	0.185	P62821	GO_BP
Cluster2	establishment of organelle localization	2	47	8	254	1.35	0.454	P62821 Q9R0L6	GO_BP
Cluster2	establishment of pigment granule localization	1	47	1	254	5.4	0.185	P62821	GO_BP
Cluster2	establishment of protein localization	4	47	27	254	0.8	0.778	P62821 Q3UYV9 Q9D824 Q9JKK1	GO_BP
Cluster2	establishment of RNA localization	2	47	8	254	1.35	0.454	Q3UYV9 Q9D824	GO_BP
Cluster2	establishment of vesicle localization	1	47	3	254	1.8	0.46	P62821	GO_BP
Cluster2	establishment or maintenance of cell polarity	1	47	10	254	0.54	0.876	E9Q9R9	GO_BP
Cluster2	extracellular matrix disassembly	1	47	1	254	5.4	0.185	A2AAY5	GO_BP
Cluster2	extracellular matrix organization	1	47	2	254	2.7	0.336	A2AAY5	GO_BP
Cluster2	extracellular structure organization	1	47	3	254	1.8	0.46	A2AAY5	GO_BP
Cluster2	extrinsic apoptotic signaling pathway	1	47	2	254	2.7	0.336	Q61851	GO_BP
Cluster2	eye development	2	47	9	254	1.2	0.52	A2AAY5 Q61851	GO_BP
Cluster2	eye morphogenesis	1	47	6	254	0.9	0.711	Q61851	GO_BP
Cluster2	Fc receptor mediated stimulatory signaling pathway	1	47	4	254	1.35	0.561	Q8BUR4	GO_BP
Cluster2	Fc receptor signaling pathway	1	47	5	254	1.08	0.644	Q8BUR4	GO_BP
Cluster2	Fc-gamma receptor signaling pathway	1	47	4	254	1.35	0.561	Q8BUR4	GO_BP
Cluster2	female genitalia development	1	47	1	254	5.4	0.185	O09000	GO_BP
Cluster2	female sex differentiation	1	47	2	254	2.7	0.336	O09000	GO_BP
Cluster2	focal adhesion assembly	1	47	2	254	2.7	0.336	Q69Z38	GO_BP
Cluster2	forebrain development	3	47	13	254	1.25	0.444	Q61851 Q9QZQ1 Q9R0L6	GO_BP
Cluster2	G protein-coupled receptor signaling pathway	1	47	8	254	0.68	0.81	Q9Z0F8	GO_BP
Cluster2	G-quadruplex DNA unwinding	1	47	1	254	5.4	0.185	O70133	GO_BP
Cluster2	G2/M transition of mitotic cell cycle	1	47	4	254	1.35	0.561	Q9R0L6	GO_BP
Cluster2	GDP metabolic process	1	47	2	254	2.7	0.336	Q9Z0U1	GO_BP
Cluster2	gene expression	19	47	63	254	1.63	0.00657	O08784 O09000 O70133 P11031 Q03172 Q05D44 Q3U5F4 Q3UH06 Q3UYV9 Q569Z6 Q6NV83 Q7TNC4 Q8BTI8 Q8CJF9 Q8VCD5 Q8VIJ6 Q99K70 Q9D0E1 Q9D824	GO_BP
Cluster2	gene silencing	3	47	7	254	2.32	0.12	O70133 Q3UYV9 Q8CJF9	GO_BP
Cluster2	gene silencing by miRNA	2	47	3	254	3.6	0.0889	Q3UYV9 Q8CJF9	GO_BP
Cluster2	gene silencing by RNA	3	47	5	254	3.24	0.0454	O70133 Q3UYV9 Q8CJF9	GO_BP
Cluster2	generation of neurons	7	47	35	254	1.08	0.481	E9Q9R9 F8VPU2 Q61851 Q9ES00 Q9QZQ1 Q9R0L6 Q9Z0F8	GO_BP
Cluster2	genitalia development	1	47	1	254	5.4	0.185	O09000	GO_BP
Cluster2	germinal center formation	1	47	1	254	5.4	0.185	Q9Z0F8	GO_BP
Cluster2	gland development	1	47	10	254	0.54	0.876	O09000	GO_BP
Cluster2	gland morphogenesis	1	47	3	254	1.8	0.46	O09000	GO_BP
Cluster2	glial cell development	1	47	3	254	1.8	0.46	Q61851	GO_BP
Cluster2	glial cell differentiation	3	47	7	254	2.32	0.12	Q61122 Q61851 Q9QZQ1	GO_BP
Cluster2	gliogenesis	3	47	8	254	2.03	0.168	Q61122 Q61851 Q9QZQ1	GO_BP
Cluster2	glycerolipid biosynthetic process	1	47	4	254	1.35	0.561	Q61851	GO_BP
Cluster2	glycerolipid metabolic process	1	47	4	254	1.35	0.561	Q61851	GO_BP
Cluster2	glycerophospholipid biosynthetic process	1	47	4	254	1.35	0.561	Q61851	GO_BP
Cluster2	glycerophospholipid metabolic process	1	47	4	254	1.35	0.561	Q61851	GO_BP
Cluster2	glycosyl compound biosynthetic process	1	47	2	254	2.7	0.336	Q8BVF2	GO_BP
Cluster2	glycosyl compound metabolic process	2	47	4	254	2.7	0.157	Q8BVF2 Q9Z0U1	GO_BP
Cluster2	GMP metabolic process	1	47	2	254	2.7	0.336	Q9Z0U1	GO_BP
Cluster2	Golgi organization	2	47	2	254	5.4	0.0336	P62821 Q9JKK1	GO_BP
Cluster2	Golgi ribbon formation	1	47	1	254	5.4	0.185	Q9JKK1	GO_BP
Cluster2	Golgi vesicle budding	1	47	1	254	5.4	0.185	P62821	GO_BP
Cluster2	Golgi vesicle transport	2	47	6	254	1.8	0.308	P60521 P62821	GO_BP
Cluster2	gonad development	1	47	4	254	1.35	0.561	O09000	GO_BP
Cluster2	granzyme-mediated apoptotic signaling pathway	1	47	1	254	5.4	0.185	Q9ES00	GO_BP
Cluster2	growth	4	47	7	254	3.09	0.0237	O09000 P97868 Q61851 Q99K70	GO_BP
Cluster2	growth hormone secretion	1	47	1	254	5.4	0.185	P62821	GO_BP
Cluster2	guanosine-containing compound metabolic process	1	47	2	254	2.7	0.336	Q9Z0U1	GO_BP
Cluster2	head development	5	47	25	254	1.08	0.508	E9Q9R9 Q61851 Q924A2 Q9QZQ1 Q9R0L6	GO_BP
Cluster2	heart development	2	47	17	254	0.64	0.859	A2AAY5 Q9ES00	GO_BP
Cluster2	heart morphogenesis	1	47	6	254	0.9	0.711	Q9ES00	GO_BP
Cluster2	heart trabecula morphogenesis	1	47	1	254	5.4	0.185	Q9ES00	GO_BP
Cluster2	hematopoietic or lymphoid organ development	3	47	16	254	1.01	0.597	Q6PD21 Q8BUR4 Q9Z0F8	GO_BP
Cluster2	hematopoietic progenitor cell differentiation	1	47	3	254	1.8	0.46	Q8BUR4	GO_BP
Cluster2	hematopoietic stem cell proliferation	1	47	2	254	2.7	0.336	Q6PD21	GO_BP
Cluster2	hemopoiesis	3	47	12	254	1.35	0.389	Q6PD21 Q8BUR4 Q9Z0F8	GO_BP
Cluster2	hemostasis	1	47	4	254	1.35	0.561	Q8BUR4	GO_BP
Cluster2	heterocycle biosynthetic process	12	47	36	254	1.8	0.0161	O08784 O09000 P11031 Q03172 Q3UH06 Q3UYV9 Q569Z6 Q8BVF2 Q8VCD5 Q99K70 Q9D824 Q9Z0U1	GO_BP
Cluster2	heterocycle catabolic process	3	47	6	254	2.7	0.079	Q3UYV9 Q569Z6 Q8CJF9	GO_BP
Cluster2	heterocycle metabolic process	20	47	76	254	1.42	0.0295	O08784 O09000 O70133 P11031 Q03172 Q3U5F4 Q3UH06 Q3UYV9 Q569Z6 Q6NV83 Q7TNC4 Q8BTI8 Q8BVF2 Q8CJF9 Q8VCD5 Q8VIJ6 Q99K70 Q9D0E1 Q9D824 Q9Z0U1	GO_BP
Cluster2	hippo signaling	1	47	2	254	2.7	0.336	Q9Z0U1	GO_BP
Cluster2	histone acetylation	1	47	5	254	1.08	0.644	O09000	GO_BP
Cluster2	histone deacetylation	1	47	1	254	5.4	0.185	Q8VIJ6	GO_BP
Cluster2	histone H3 deacetylation	1	47	1	254	5.4	0.185	Q8VIJ6	GO_BP
Cluster2	histone modification	2	47	12	254	0.9	0.687	O09000 Q8VIJ6	GO_BP
Cluster2	histone mRNA metabolic process	1	47	1	254	5.4	0.185	Q3UYV9	GO_BP
Cluster2	homeostasis of number of cells	1	47	4	254	1.35	0.561	Q9QZQ1	GO_BP
Cluster2	homeostatic process	2	47	26	254	0.42	0.972	A2ALK8 Q9QZQ1	GO_BP
Cluster2	hormone secretion	1	47	2	254	2.7	0.336	P62821	GO_BP
Cluster2	hormone transport	1	47	2	254	2.7	0.336	P62821	GO_BP
Cluster2	hormone-mediated signaling pathway	3	47	4	254	4.05	0.0209	O09000 Q569Z6 Q8VCD5	GO_BP
Cluster2	immune effector process	2	47	12	254	0.9	0.687	Q8BUR4 Q9Z0F8	GO_BP
Cluster2	immune response	1	47	12	254	0.45	0.919	Q9Z0F8	GO_BP
Cluster2	immune response-activating signal transduction	2	47	6	254	1.8	0.308	Q6PD21 Q8BUR4	GO_BP
Cluster2	immune response-regulating signaling pathway	2	47	7	254	1.54	0.382	Q6PD21 Q8BUR4	GO_BP
Cluster2	immune system development	3	47	16	254	1.01	0.597	Q6PD21 Q8BUR4 Q9Z0F8	GO_BP
Cluster2	immune system process	4	47	29	254	0.75	0.827	Q6PD21 Q8BUR4 Q8VIJ6 Q9Z0F8	GO_BP
Cluster2	import into cell	2	47	14	254	0.77	0.77	P62821 Q8BUR4	GO_BP
Cluster2	in utero embryonic development	2	47	16	254	0.68	0.834	O09000 P97868	GO_BP
Cluster2	inflammatory response	1	47	3	254	1.8	0.46	Q9Z0F8	GO_BP
Cluster2	inner ear development	1	47	5	254	1.08	0.644	Q61851	GO_BP
Cluster2	inner ear receptor cell differentiation	1	47	3	254	1.8	0.46	Q61851	GO_BP
Cluster2	innervation	1	47	1	254	5.4	0.185	Q61851	GO_BP
Cluster2	inorganic anion transmembrane transport	1	47	3	254	1.8	0.46	Q6PB70	GO_BP
Cluster2	inorganic anion transport	1	47	3	254	1.8	0.46	Q6PB70	GO_BP
Cluster2	inorganic ion transmembrane transport	1	47	9	254	0.6	0.847	Q6PB70	GO_BP
Cluster2	integrin-mediated signaling pathway	1	47	2	254	2.7	0.336	Q8BUR4	GO_BP
Cluster2	interkinetic nuclear migration	1	47	3	254	1.8	0.46	Q9R0L6	GO_BP
Cluster2	interleukin-8 production	1	47	1	254	5.4	0.185	P62821	GO_BP
Cluster2	interleukin-8 secretion	1	47	1	254	5.4	0.185	P62821	GO_BP
Cluster2	internal peptidyl-lysine acetylation	1	47	5	254	1.08	0.644	O09000	GO_BP
Cluster2	internal protein amino acid acetylation	1	47	5	254	1.08	0.644	O09000	GO_BP
Cluster2	interspecies interaction between organisms	2	47	7	254	1.54	0.382	O70133 P62821	GO_BP
Cluster2	intestinal absorption	1	47	1	254	5.4	0.185	Q9Z0U1	GO_BP
Cluster2	intra-Golgi vesicle-mediated transport	1	47	1	254	5.4	0.185	P60521	GO_BP
Cluster2	intracellular protein transport	4	47	21	254	1.03	0.569	P62821 Q3UYV9 Q9D824 Q9JKK1	GO_BP
Cluster2	intracellular receptor signaling pathway	3	47	5	254	3.24	0.0454	O09000 Q569Z6 Q8VCD5	GO_BP
Cluster2	intracellular signal transduction	6	47	39	254	0.83	0.775	E9Q9R9 Q3UH06 Q61851 Q8BUR4 Q99K70 Q9Z0U1	GO_BP
Cluster2	intracellular transport	5	47	38	254	0.71	0.877	P62821 Q3UYV9 Q9D824 Q9JKK1 Q9R0L6	GO_BP
Cluster2	intraciliary transport	1	47	1	254	5.4	0.185	Q9R0L6	GO_BP
Cluster2	intraciliary transport involved in cilium assembly	1	47	1	254	5.4	0.185	Q9R0L6	GO_BP
Cluster2	intraspecies interaction between organisms	2	47	2	254	5.4	0.0336	Q924A2 Q9R0L6	GO_BP
Cluster2	ion homeostasis	1	47	10	254	0.54	0.876	A2ALK8	GO_BP
Cluster2	ion transmembrane transport	1	47	9	254	0.6	0.847	Q6PB70	GO_BP
Cluster2	ion transport	1	47	12	254	0.45	0.919	Q6PB70	GO_BP
Cluster2	kidney development	1	47	2	254	2.7	0.336	E9Q9R9	GO_BP
Cluster2	labyrinthine layer development	1	47	5	254	1.08	0.644	O09000	GO_BP
Cluster2	labyrinthine layer morphogenesis	1	47	2	254	2.7	0.336	O09000	GO_BP
Cluster2	learning	1	47	3	254	1.8	0.46	Q924A2	GO_BP
Cluster2	learning or memory	1	47	4	254	1.35	0.561	Q924A2	GO_BP
Cluster2	lens development in camera-type eye	1	47	2	254	2.7	0.336	Q61851	GO_BP
Cluster2	lens fiber cell development	1	47	2	254	2.7	0.336	Q61851	GO_BP
Cluster2	lens fiber cell differentiation	1	47	2	254	2.7	0.336	Q61851	GO_BP
Cluster2	lens morphogenesis in camera-type eye	1	47	1	254	5.4	0.185	Q61851	GO_BP
Cluster2	leukocyte activation	2	47	16	254	0.68	0.834	Q6PD21 Q9Z0F8	GO_BP
Cluster2	leukocyte differentiation	1	47	7	254	0.77	0.766	Q9Z0F8	GO_BP
Cluster2	leukocyte mediated immunity	1	47	6	254	0.9	0.711	Q9Z0F8	GO_BP
Cluster2	leukocyte proliferation	1	47	1	254	5.4	0.185	Q6PD21	GO_BP
Cluster2	lipid biosynthetic process	2	47	5	254	2.16	0.231	Q61851 Q9DBS9	GO_BP
Cluster2	lipid localization	1	47	2	254	2.7	0.336	Q9DBS9	GO_BP
Cluster2	lipid metabolic process	2	47	8	254	1.35	0.454	Q61851 Q9DBS9	GO_BP
Cluster2	lipid modification	1	47	3	254	1.8	0.46	Q61851	GO_BP
Cluster2	lipid phosphorylation	1	47	3	254	1.8	0.46	Q61851	GO_BP
Cluster2	lipid transport	1	47	2	254	2.7	0.336	Q9DBS9	GO_BP
Cluster2	lipoprotein biosynthetic process	1	47	1	254	5.4	0.185	Q8VDZ4	GO_BP
Cluster2	lipoprotein metabolic process	1	47	1	254	5.4	0.185	Q8VDZ4	GO_BP
Cluster2	localization	17	47	91	254	1.01	0.541	A2AAY5 E9Q9R9 O70133 P60521 P62821 Q3UYV9 Q69Z38 Q6PB70 Q8BUR4 Q99K70 Q9D824 Q9DBS9 Q9JKK1 Q9QZQ1 Q9R0L6 Q9Z0F8 Q9Z0U1	GO_BP
Cluster2	localization of cell	5	47	19	254	1.42	0.261	P62821 Q69Z38 Q8BUR4 Q9R0L6 Q9Z0F8	GO_BP
Cluster2	localization within membrane	1	47	2	254	2.7	0.336	P62821	GO_BP
Cluster2	locomotion	5	47	24	254	1.13	0.468	P62821 Q69Z38 Q8BUR4 Q9R0L6 Q9Z0F8	GO_BP
Cluster2	lung alveolus development	2	47	2	254	5.4	0.0336	Q61851 Q924A2	GO_BP
Cluster2	lung development	3	47	8	254	2.03	0.168	E9Q9R9 Q61851 Q924A2	GO_BP
Cluster2	lung epithelium development	1	47	2	254	2.7	0.336	Q61851	GO_BP
Cluster2	lung morphogenesis	1	47	3	254	1.8	0.46	E9Q9R9	GO_BP
Cluster2	lung saccule development	1	47	1	254	5.4	0.185	Q61851	GO_BP
Cluster2	lymphocyte activation	2	47	8	254	1.35	0.454	Q6PD21 Q9Z0F8	GO_BP
Cluster2	lymphocyte differentiation	1	47	6	254	0.9	0.711	Q9Z0F8	GO_BP
Cluster2	lymphocyte proliferation	1	47	1	254	5.4	0.185	Q6PD21	GO_BP
Cluster2	macroautophagy	2	47	6	254	1.8	0.308	P60521 P62821	GO_BP
Cluster2	macromolecule biosynthetic process	12	47	41	254	1.58	0.0472	O08784 O09000 P11031 Q03172 Q05D44 Q3UH06 Q3UYV9 Q569Z6 Q8VCD5 Q8VDZ4 Q99K70 Q9D824	GO_BP
Cluster2	macromolecule catabolic process	5	47	15	254	1.8	0.121	P97868 Q3UYV9 Q569Z6 Q8CJF9 Q9ES00	GO_BP
Cluster2	macromolecule deacylation	1	47	1	254	5.4	0.185	Q8VIJ6	GO_BP
Cluster2	macromolecule localization	11	47	42	254	1.42	0.119	A2AAY5 E9Q9R9 O70133 P62821 Q3UYV9 Q99K70 Q9D824 Q9DBS9 Q9JKK1 Q9QZQ1 Q9R0L6	GO_BP
Cluster2	macromolecule metabolic process	28	47	125	254	1.21	0.0788	A2ALK8 O08784 O09000 O70133 P11031 P62821 P97868 Q03172 Q05D44 Q3U5F4 Q3UH06 Q3UYV9 Q569Z6 Q61851 Q69Z38 Q6NV83 Q6PB70 Q7TNC4 Q8BTI8 Q8CJF9 Q8VCD5 Q8VDZ4 Q8VIJ6 Q99K70 Q9D0E1 Q9D824 Q9ES00 Q9Z0F8	GO_BP
Cluster2	macromolecule modification	12	47	70	254	0.93	0.696	A2ALK8 O09000 P62821 P97868 Q3U5F4 Q61851 Q69Z38 Q6PB70 Q8VCD5 Q8VDZ4 Q8VIJ6 Q9ES00	GO_BP
Cluster2	maintenance of cell number	3	47	9	254	1.8	0.22	Q61851 Q8VCD5 Q9R0L6	GO_BP
Cluster2	maintenance of cell polarity	1	47	2	254	2.7	0.336	E9Q9R9	GO_BP
Cluster2	male gonad development	1	47	3	254	1.8	0.46	O09000	GO_BP
Cluster2	male sex differentiation	1	47	3	254	1.8	0.46	O09000	GO_BP
Cluster2	mammary gland branching involved in thelarche	1	47	1	254	5.4	0.185	O09000	GO_BP
Cluster2	mammary gland development	1	47	7	254	0.77	0.766	O09000	GO_BP
Cluster2	mammary gland duct morphogenesis	1	47	2	254	2.7	0.336	O09000	GO_BP
Cluster2	mammary gland epithelium development	1	47	4	254	1.35	0.561	O09000	GO_BP
Cluster2	mammary gland morphogenesis	1	47	2	254	2.7	0.336	O09000	GO_BP
Cluster2	MAPK cascade	1	47	12	254	0.45	0.919	Q61851	GO_BP
Cluster2	mechanoreceptor differentiation	1	47	3	254	1.8	0.46	Q61851	GO_BP
Cluster2	melanosome localization	1	47	1	254	5.4	0.185	P62821	GO_BP
Cluster2	melanosome transport	1	47	1	254	5.4	0.185	P62821	GO_BP
Cluster2	membrane docking	2	47	5	254	2.16	0.231	Q9JKK1 Q9R0L6	GO_BP
Cluster2	membrane fusion	1	47	2	254	2.7	0.336	Q9JKK1	GO_BP
Cluster2	membrane invagination	1	47	1	254	5.4	0.185	Q8BUR4	GO_BP
Cluster2	membrane organization	3	47	13	254	1.25	0.444	P62821 Q8BUR4 Q9JKK1	GO_BP
Cluster2	membrane protein ectodomain proteolysis	1	47	1	254	5.4	0.185	Q9Z0F8	GO_BP
Cluster2	membrane protein intracellular domain proteolysis	1	47	1	254	5.4	0.185	Q9Z0F8	GO_BP
Cluster2	membrane protein proteolysis	1	47	1	254	5.4	0.185	Q9Z0F8	GO_BP
Cluster2	memory	1	47	2	254	2.7	0.336	Q924A2	GO_BP
Cluster2	mesenchymal cell development	1	47	4	254	1.35	0.561	O08784	GO_BP
Cluster2	mesenchymal cell differentiation	2	47	6	254	1.8	0.308	E9Q9R9 O08784	GO_BP
Cluster2	mesenchyme development	2	47	7	254	1.54	0.382	E9Q9R9 O08784	GO_BP
Cluster2	metabolic process	33	47	139	254	1.28	0.0131	A2AAY5 A2ALK8 O08784 O09000 O70133 P11031 P60521 P62821 P97868 Q03172 Q05D44 Q3U5F4 Q3UH06 Q3UYV9 Q569Z6 Q61851 Q69Z38 Q6NV83 Q6PB70 Q7TNC4 Q8BTI8 Q8BVF2 Q8CJF9 Q8VCD5 Q8VDZ4 Q8VIJ6 Q99K70 Q9D0E1 Q9D824 Q9DBS9 Q9ES00 Q9Z0F8 Q9Z0U1	GO_BP
Cluster2	metanephric collecting duct development	1	47	1	254	5.4	0.185	E9Q9R9	GO_BP
Cluster2	metanephros development	1	47	1	254	5.4	0.185	E9Q9R9	GO_BP
Cluster2	microtubule anchoring	1	47	1	254	5.4	0.185	Q9R0L6	GO_BP
Cluster2	microtubule anchoring at centrosome	1	47	1	254	5.4	0.185	Q9R0L6	GO_BP
Cluster2	microtubule cytoskeleton organization	2	47	14	254	0.77	0.77	A2AJI0 Q9R0L6	GO_BP
Cluster2	microtubule organizing center organization	1	47	2	254	2.7	0.336	Q9R0L6	GO_BP
Cluster2	microtubule-based movement	2	47	6	254	1.8	0.308	P62821 Q9R0L6	GO_BP
Cluster2	microtubule-based process	3	47	16	254	1.01	0.597	A2AJI0 P62821 Q9R0L6	GO_BP
Cluster2	microtubule-based transport	2	47	4	254	2.7	0.157	P62821 Q9R0L6	GO_BP
Cluster2	midbrain development	2	47	4	254	2.7	0.157	E9Q9R9 Q61851	GO_BP
Cluster2	miRNA mediated inhibition of translation	1	47	1	254	5.4	0.185	Q8CJF9	GO_BP
Cluster2	mitochondrion disassembly	1	47	3	254	1.8	0.46	P60521	GO_BP
Cluster2	mitochondrion organization	1	47	11	254	0.49	0.9	P60521	GO_BP
Cluster2	mitotic cell cycle	1	47	17	254	0.32	0.973	Q9R0L6	GO_BP
Cluster2	mitotic cell cycle phase transition	1	47	8	254	0.68	0.81	Q9R0L6	GO_BP
Cluster2	mitotic cell cycle process	1	47	15	254	0.36	0.958	Q9R0L6	GO_BP
Cluster2	modification-dependent protein catabolic process	2	47	6	254	1.8	0.308	P97868 Q9ES00	GO_BP
Cluster2	monocarboxylic acid biosynthetic process	1	47	1	254	5.4	0.185	Q9DBS9	GO_BP
Cluster2	monocarboxylic acid metabolic process	1	47	4	254	1.35	0.561	Q9DBS9	GO_BP
Cluster2	mononuclear cell proliferation	1	47	1	254	5.4	0.185	Q6PD21	GO_BP
Cluster2	morphogenesis of a branching epithelium	2	47	4	254	2.7	0.157	E9Q9R9 O09000	GO_BP
Cluster2	morphogenesis of a branching structure	2	47	5	254	2.16	0.231	E9Q9R9 O09000	GO_BP
Cluster2	morphogenesis of a polarized epithelium	1	47	3	254	1.8	0.46	E9Q9R9	GO_BP
Cluster2	morphogenesis of an epithelial sheet	1	47	3	254	1.8	0.46	Q9Z0F8	GO_BP
Cluster2	morphogenesis of an epithelium	4	47	16	254	1.35	0.34	E9Q9R9 O09000 Q61851 Q9Z0F8	GO_BP
Cluster2	motile cilium assembly	1	47	1	254	5.4	0.185	Q6P9S1	GO_BP
Cluster2	movement of cell or subcellular component	5	47	29	254	0.93	0.657	P62821 Q69Z38 Q8BUR4 Q9R0L6 Q9Z0F8	GO_BP
Cluster2	mRNA 3'-end processing	2	47	8	254	1.35	0.454	Q3UYV9 Q9D824	GO_BP
Cluster2	mRNA catabolic process	3	47	6	254	2.7	0.079	Q3UYV9 Q569Z6 Q8CJF9	GO_BP
Cluster2	mRNA cleavage	3	47	3	254	5.4	0.00601	Q3UYV9 Q8CJF9 Q9D824	GO_BP
Cluster2	mRNA cleavage involved in gene silencing	1	47	1	254	5.4	0.185	Q8CJF9	GO_BP
Cluster2	mRNA cleavage involved in gene silencing by miRNA	1	47	1	254	5.4	0.185	Q8CJF9	GO_BP
Cluster2	mRNA cleavage involved in mRNA processing	2	47	2	254	5.4	0.0336	Q3UYV9 Q9D824	GO_BP
Cluster2	mRNA export from nucleus	2	47	8	254	1.35	0.454	Q3UYV9 Q9D824	GO_BP
Cluster2	mRNA metabolic process	10	47	32	254	1.69	0.046	O70133 Q3UYV9 Q569Z6 Q6NV83 Q7TNC4 Q8BTI8 Q8CJF9 Q8VIJ6 Q9D0E1 Q9D824	GO_BP
Cluster2	mRNA polyadenylation	1	47	4	254	1.35	0.561	Q9D824	GO_BP
Cluster2	mRNA processing	8	47	26	254	1.66	0.0808	O70133 Q3UYV9 Q6NV83 Q7TNC4 Q8BTI8 Q8VIJ6 Q9D0E1 Q9D824	GO_BP
Cluster2	mRNA splice site selection	1	47	2	254	2.7	0.336	Q7TNC4	GO_BP
Cluster2	mRNA splicing, via spliceosome	8	47	21	254	2.06	0.0227	O70133 Q3UYV9 Q6NV83 Q7TNC4 Q8BTI8 Q8VIJ6 Q9D0E1 Q9D824	GO_BP
Cluster2	mRNA stabilization	2	47	3	254	3.6	0.0889	O70133 Q569Z6	GO_BP
Cluster2	mRNA transport	2	47	8	254	1.35	0.454	Q3UYV9 Q9D824	GO_BP
Cluster2	multi-multicellular organism process	1	47	2	254	2.7	0.336	A2AAY5	GO_BP
Cluster2	multi-organism process	7	47	25	254	1.51	0.154	A2AAY5 O70133 P62821 Q924A2 Q9D0E1 Q9R0L6 Q9Z0F8	GO_BP
Cluster2	multi-organism reproductive process	1	47	7	254	0.77	0.766	A2AAY5	GO_BP
Cluster2	multicellular organism development	17	47	86	254	1.07	0.416	A2AAY5 E9Q9R9 F8VPU2 O08784 O09000 P97868 Q03172 Q3UH06 Q61122 Q61851 Q6PD21 Q8BUR4 Q924A2 Q9ES00 Q9QZQ1 Q9R0L6 Q9Z0F8	GO_BP
Cluster2	multicellular organism growth	2	47	3	254	3.6	0.0889	O09000 P97868	GO_BP
Cluster2	multicellular organism reproduction	1	47	7	254	0.77	0.766	A2AAY5	GO_BP
Cluster2	multicellular organismal process	20	47	99	254	1.09	0.346	A2AAY5 E9Q9R9 F8VPU2 O08784 O09000 P62821 P97868 Q03172 Q3UH06 Q61122 Q61851 Q6PD21 Q8BUR4 Q8VCD5 Q924A2 Q9ES00 Q9QZQ1 Q9R0L6 Q9Z0F8 Q9Z0U1	GO_BP
Cluster2	multicellular organismal reproductive process	1	47	7	254	0.77	0.766	A2AAY5	GO_BP
Cluster2	muscle organ development	1	47	4	254	1.35	0.561	Q9ES00	GO_BP
Cluster2	muscle organ morphogenesis	1	47	2	254	2.7	0.336	Q9ES00	GO_BP
Cluster2	muscle structure development	1	47	9	254	0.6	0.847	Q9ES00	GO_BP
Cluster2	muscle tissue development	1	47	5	254	1.08	0.644	Q9ES00	GO_BP
Cluster2	muscle tissue morphogenesis	1	47	2	254	2.7	0.336	Q9ES00	GO_BP
Cluster2	myelination	2	47	4	254	2.7	0.157	Q61122 Q61851	GO_BP
Cluster2	myeloid leukocyte mediated immunity	1	47	6	254	0.9	0.711	Q9Z0F8	GO_BP
Cluster2	ncRNA metabolic process	4	47	14	254	1.54	0.247	O08784 Q3U5F4 Q3UYV9 Q8CJF9	GO_BP
Cluster2	ncRNA processing	3	47	11	254	1.47	0.332	Q3U5F4 Q3UYV9 Q8CJF9	GO_BP
Cluster2	ncRNA transcription	2	47	3	254	3.6	0.0889	O08784 Q3UYV9	GO_BP
Cluster2	negative regulation of apoptotic process	2	47	21	254	0.51	0.93	O09000 Q9Z0F8	GO_BP
Cluster2	negative regulation of astrocyte differentiation	1	47	1	254	5.4	0.185	Q61851	GO_BP
Cluster2	negative regulation of binding	1	47	6	254	0.9	0.711	Q6PGG6	GO_BP
Cluster2	negative regulation of biological process	24	47	112	254	1.16	0.183	A2ALK8 E9Q9R9 F8VPU2 O09000 O70133 P60521 Q03172 Q3U5F4 Q3UH06 Q3UYV9 Q569Z6 Q61122 Q61851 Q6PD21 Q6PGG6 Q8BVF2 Q8CJF9 Q8R4Z4 Q8VIJ6 Q924A2 Q99K70 Q9R0L6 Q9Z0F8 Q9Z0U1	GO_BP
Cluster2	negative regulation of biosynthetic process	9	47	42	254	1.16	0.365	Q03172 Q3UH06 Q61122 Q61851 Q6PGG6 Q8CJF9 Q8R4Z4 Q8VIJ6 Q924A2	GO_BP
Cluster2	negative regulation of bone development	1	47	1	254	5.4	0.185	Q9Z0U1	GO_BP
Cluster2	negative regulation of catabolic process	5	47	10	254	2.7	0.0215	A2ALK8 O70133 P60521 Q569Z6 Q8BVF2	GO_BP
Cluster2	negative regulation of catalytic activity	2	47	15	254	0.72	0.804	F8VPU2 Q6PD21	GO_BP
Cluster2	negative regulation of cell activation	1	47	3	254	1.8	0.46	E9Q9R9	GO_BP
Cluster2	negative regulation of cell adhesion	1	47	5	254	1.08	0.644	E9Q9R9	GO_BP
Cluster2	negative regulation of cell communication	4	47	23	254	0.94	0.649	A2ALK8 E9Q9R9 Q61851 Q9Z0F8	GO_BP
Cluster2	negative regulation of cell cycle	3	47	10	254	1.62	0.276	A2ALK8 Q61851 Q99K70	GO_BP
Cluster2	negative regulation of cell cycle process	1	47	2	254	2.7	0.336	Q61851	GO_BP
Cluster2	negative regulation of cell death	2	47	25	254	0.43	0.967	O09000 Q9Z0F8	GO_BP
Cluster2	negative regulation of cell development	5	47	9	254	3	0.0125	Q61851 Q6PD21 Q9R0L6 Q9Z0F8 Q9Z0U1	GO_BP
Cluster2	negative regulation of cell differentiation	6	47	23	254	1.41	0.234	O09000 Q61851 Q6PD21 Q9R0L6 Q9Z0F8 Q9Z0U1	GO_BP
Cluster2	negative regulation of cell maturation	1	47	1	254	5.4	0.185	Q6PD21	GO_BP
Cluster2	negative regulation of cell migration	1	47	3	254	1.8	0.46	E9Q9R9	GO_BP
Cluster2	negative regulation of cell motility	1	47	3	254	1.8	0.46	E9Q9R9	GO_BP
Cluster2	negative regulation of cell-cell adhesion	1	47	4	254	1.35	0.561	E9Q9R9	GO_BP
Cluster2	negative regulation of cellular catabolic process	5	47	10	254	2.7	0.0215	A2ALK8 O70133 P60521 Q569Z6 Q8BVF2	GO_BP
Cluster2	negative regulation of cellular component movement	1	47	3	254	1.8	0.46	E9Q9R9	GO_BP
Cluster2	negative regulation of cellular metabolic process	16	47	64	254	1.35	0.0888	A2ALK8 F8VPU2 O70133 P60521 Q03172 Q3UH06 Q569Z6 Q61122 Q61851 Q6PD21 Q6PGG6 Q8BVF2 Q8CJF9 Q8R4Z4 Q8VIJ6 Q924A2	GO_BP
Cluster2	negative regulation of cellular process	22	47	106	254	1.12	0.267	A2ALK8 E9Q9R9 F8VPU2 O09000 O70133 P60521 Q03172 Q3UH06 Q569Z6 Q61122 Q61851 Q6PD21 Q6PGG6 Q8BVF2 Q8CJF9 Q8R4Z4 Q8VIJ6 Q924A2 Q99K70 Q9R0L6 Q9Z0F8 Q9Z0U1	GO_BP
Cluster2	negative regulation of chromosome organization	1	47	3	254	1.8	0.46	Q6PGG6	GO_BP
Cluster2	negative regulation of circadian rhythm	1	47	1	254	5.4	0.185	Q8VIJ6	GO_BP
Cluster2	negative regulation of dephosphorylation	1	47	3	254	1.8	0.46	F8VPU2	GO_BP
Cluster2	negative regulation of developmental growth	1	47	2	254	2.7	0.336	Q61851	GO_BP
Cluster2	negative regulation of developmental process	6	47	27	254	1.2	0.38	O09000 Q61851 Q6PD21 Q9R0L6 Q9Z0F8 Q9Z0U1	GO_BP
Cluster2	negative regulation of DNA biosynthetic process	1	47	1	254	5.4	0.185	Q6PGG6	GO_BP
Cluster2	negative regulation of DNA metabolic process	1	47	2	254	2.7	0.336	Q6PGG6	GO_BP
Cluster2	negative regulation of ERBB signaling pathway	1	47	2	254	2.7	0.336	A2ALK8	GO_BP
Cluster2	negative regulation of gene expression	11	47	49	254	1.21	0.273	O70133 Q03172 Q3UH06 Q3UYV9 Q569Z6 Q61122 Q61851 Q8CJF9 Q8R4Z4 Q8VIJ6 Q924A2	GO_BP
Cluster2	negative regulation of glial cell differentiation	1	47	1	254	5.4	0.185	Q61851	GO_BP
Cluster2	negative regulation of gliogenesis	1	47	1	254	5.4	0.185	Q61851	GO_BP
Cluster2	negative regulation of growth	1	47	6	254	0.9	0.711	Q61851	GO_BP
Cluster2	negative regulation of hemopoiesis	1	47	6	254	0.9	0.711	Q9Z0U1	GO_BP
Cluster2	negative regulation of hippo signaling	1	47	1	254	5.4	0.185	E9Q9R9	GO_BP
Cluster2	negative regulation of hydrolase activity	1	47	8	254	0.68	0.81	F8VPU2	GO_BP
Cluster2	negative regulation of immune system process	2	47	9	254	1.2	0.52	E9Q9R9 Q9Z0U1	GO_BP
Cluster2	negative regulation of kinase activity	1	47	9	254	0.6	0.847	Q6PD21	GO_BP
Cluster2	negative regulation of leukocyte activation	1	47	3	254	1.8	0.46	E9Q9R9	GO_BP
Cluster2	negative regulation of leukocyte differentiation	1	47	3	254	1.8	0.46	Q9Z0U1	GO_BP
Cluster2	negative regulation of leukocyte proliferation	1	47	2	254	2.7	0.336	E9Q9R9	GO_BP
Cluster2	negative regulation of locomotion	1	47	4	254	1.35	0.561	E9Q9R9	GO_BP
Cluster2	negative regulation of lymphocyte activation	1	47	3	254	1.8	0.46	E9Q9R9	GO_BP
Cluster2	negative regulation of lymphocyte proliferation	1	47	2	254	2.7	0.336	E9Q9R9	GO_BP
Cluster2	negative regulation of metabolic process	17	47	68	254	1.35	0.0786	A2ALK8 F8VPU2 O70133 P60521 Q03172 Q3UH06 Q3UYV9 Q569Z6 Q61122 Q61851 Q6PD21 Q6PGG6 Q8BVF2 Q8CJF9 Q8R4Z4 Q8VIJ6 Q924A2	GO_BP
Cluster2	negative regulation of mitotic cell cycle	2	47	4	254	2.7	0.157	A2ALK8 Q61851	GO_BP
Cluster2	negative regulation of mitotic nuclear division	1	47	1	254	5.4	0.185	Q61851	GO_BP
Cluster2	negative regulation of molecular function	3	47	21	254	0.77	0.786	F8VPU2 Q6PD21 Q6PGG6	GO_BP
Cluster2	negative regulation of mRNA catabolic process	2	47	3	254	3.6	0.0889	O70133 Q569Z6	GO_BP
Cluster2	negative regulation of mRNA metabolic process	2	47	3	254	3.6	0.0889	O70133 Q569Z6	GO_BP
Cluster2	negative regulation of multi-organism process	1	47	3	254	1.8	0.46	Q6PD21	GO_BP
Cluster2	negative regulation of nervous system development	3	47	7	254	2.32	0.12	Q61851 Q9R0L6 Q9Z0F8	GO_BP
Cluster2	negative regulation of neurogenesis	3	47	7	254	2.32	0.12	Q61851 Q9R0L6 Q9Z0F8	GO_BP
Cluster2	negative regulation of neuron differentiation	1	47	4	254	1.35	0.561	Q9Z0F8	GO_BP
Cluster2	negative regulation of nuclear division	1	47	1	254	5.4	0.185	Q61851	GO_BP
Cluster2	negative regulation of oocyte development	1	47	1	254	5.4	0.185	Q6PD21	GO_BP
Cluster2	negative regulation of oocyte maturation	1	47	1	254	5.4	0.185	Q6PD21	GO_BP
Cluster2	negative regulation of oogenesis	1	47	1	254	5.4	0.185	Q6PD21	GO_BP
Cluster2	negative regulation of organelle organization	2	47	9	254	1.2	0.52	Q61851 Q6PGG6	GO_BP
Cluster2	negative regulation of osteoclast development	1	47	1	254	5.4	0.185	Q9Z0U1	GO_BP
Cluster2	negative regulation of osteoclast differentiation	1	47	1	254	5.4	0.185	Q9Z0U1	GO_BP
Cluster2	negative regulation of phosphatase activity	1	47	3	254	1.8	0.46	F8VPU2	GO_BP
Cluster2	negative regulation of phosphate metabolic process	2	47	17	254	0.64	0.859	F8VPU2 Q6PD21	GO_BP
Cluster2	negative regulation of phosphorylation	1	47	14	254	0.39	0.948	Q6PD21	GO_BP
Cluster2	negative regulation of programmed cell death	2	47	21	254	0.51	0.93	O09000 Q9Z0F8	GO_BP
Cluster2	negative regulation of protein binding	1	47	4	254	1.35	0.561	Q6PGG6	GO_BP
Cluster2	negative regulation of protein catabolic process	3	47	6	254	2.7	0.079	A2ALK8 P60521 Q8BVF2	GO_BP
Cluster2	negative regulation of protein kinase activity	1	47	8	254	0.68	0.81	Q6PD21	GO_BP
Cluster2	negative regulation of protein metabolic process	6	47	26	254	1.25	0.343	A2ALK8 P60521 Q6PD21 Q6PGG6 Q8BVF2 Q8CJF9	GO_BP
Cluster2	negative regulation of protein phosphorylation	1	47	13	254	0.42	0.935	Q6PD21	GO_BP
Cluster2	negative regulation of protein sumoylation	1	47	1	254	5.4	0.185	Q6PGG6	GO_BP
Cluster2	negative regulation of protein ubiquitination	1	47	2	254	2.7	0.336	Q6PGG6	GO_BP
Cluster2	negative regulation of proteolysis	3	47	9	254	1.8	0.22	A2ALK8 P60521 Q8BVF2	GO_BP
Cluster2	negative regulation of reproductive process	1	47	2	254	2.7	0.336	Q6PD21	GO_BP
Cluster2	negative regulation of response to stimulus	4	47	26	254	0.83	0.75	A2ALK8 E9Q9R9 Q61851 Q9Z0F8	GO_BP
Cluster2	negative regulation of RNA biosynthetic process	7	47	39	254	0.97	0.614	Q03172 Q3UH06 Q61122 Q61851 Q8R4Z4 Q8VIJ6 Q924A2	GO_BP
Cluster2	negative regulation of RNA catabolic process	2	47	3	254	3.6	0.0889	O70133 Q569Z6	GO_BP
Cluster2	negative regulation of RNA metabolic process	9	47	41	254	1.19	0.335	O70133 Q03172 Q3UH06 Q569Z6 Q61122 Q61851 Q8R4Z4 Q8VIJ6 Q924A2	GO_BP
Cluster2	negative regulation of signal transduction	4	47	22	254	0.98	0.61	A2ALK8 E9Q9R9 Q61851 Q9Z0F8	GO_BP
Cluster2	negative regulation of signaling	4	47	23	254	0.94	0.649	A2ALK8 E9Q9R9 Q61851 Q9Z0F8	GO_BP
Cluster2	negative regulation of stem cell differentiation	1	47	1	254	5.4	0.185	O09000	GO_BP
Cluster2	negative regulation of T cell activation	1	47	3	254	1.8	0.46	E9Q9R9	GO_BP
Cluster2	negative regulation of T cell proliferation	1	47	2	254	2.7	0.336	E9Q9R9	GO_BP
Cluster2	negative regulation of telomere maintenance	1	47	1	254	5.4	0.185	Q6PGG6	GO_BP
Cluster2	negative regulation of transferase activity	1	47	9	254	0.6	0.847	Q6PD21	GO_BP
Cluster2	negative regulation of translation	1	47	2	254	2.7	0.336	Q8CJF9	GO_BP
Cluster2	negative regulation of translation, ncRNA-mediated	1	47	1	254	5.4	0.185	Q8CJF9	GO_BP
Cluster2	negative regulation of transport	1	47	7	254	0.77	0.766	Q3U5F4	GO_BP
Cluster2	nerve development	1	47	1	254	5.4	0.185	Q61851	GO_BP
Cluster2	nervous system development	9	47	47	254	1.03	0.521	E9Q9R9 F8VPU2 Q61122 Q61851 Q924A2 Q9ES00 Q9QZQ1 Q9R0L6 Q9Z0F8	GO_BP
Cluster2	nervous system process	1	47	9	254	0.6	0.847	Q924A2	GO_BP
Cluster2	neural crest cell development	1	47	4	254	1.35	0.561	O08784	GO_BP
Cluster2	neural crest cell differentiation	1	47	4	254	1.35	0.561	O08784	GO_BP
Cluster2	neural crest formation	1	47	2	254	2.7	0.336	O08784	GO_BP
Cluster2	neural nucleus development	1	47	2	254	2.7	0.336	Q61851	GO_BP
Cluster2	neural precursor cell proliferation	1	47	6	254	0.9	0.711	Q9R0L6	GO_BP
Cluster2	neuroepithelial cell differentiation	1	47	2	254	2.7	0.336	Q9QZQ1	GO_BP
Cluster2	neurogenesis	8	47	38	254	1.14	0.404	E9Q9R9 F8VPU2 Q61122 Q61851 Q9ES00 Q9QZQ1 Q9R0L6 Q9Z0F8	GO_BP
Cluster2	neuron development	3	47	19	254	0.85	0.721	F8VPU2 Q61851 Q9ES00	GO_BP
Cluster2	neuron differentiation	3	47	22	254	0.74	0.814	F8VPU2 Q61851 Q9ES00	GO_BP
Cluster2	neuron migration	1	47	3	254	1.8	0.46	Q9R0L6	GO_BP
Cluster2	neuron projection development	3	47	19	254	0.85	0.721	F8VPU2 Q61851 Q9ES00	GO_BP
Cluster2	neuron projection morphogenesis	2	47	12	254	0.9	0.687	F8VPU2 Q61851	GO_BP
Cluster2	neuronal stem cell population maintenance	1	47	2	254	2.7	0.336	Q9R0L6	GO_BP
Cluster2	neutrophil mediated immunity	1	47	6	254	0.9	0.711	Q9Z0F8	GO_BP
Cluster2	nitrogen compound metabolic process	30	47	129	254	1.26	0.0339	A2ALK8 O08784 O09000 O70133 P11031 P62821 P97868 Q03172 Q05D44 Q3U5F4 Q3UH06 Q3UYV9 Q569Z6 Q61851 Q69Z38 Q6NV83 Q6PB70 Q7TNC4 Q8BTI8 Q8BVF2 Q8CJF9 Q8VCD5 Q8VDZ4 Q8VIJ6 Q99K70 Q9D0E1 Q9D824 Q9ES00 Q9Z0F8 Q9Z0U1	GO_BP
Cluster2	nitrogen compound transport	4	47	25	254	0.86	0.718	P62821 Q3UYV9 Q9D824 Q9JKK1	GO_BP
Cluster2	non-canonical Wnt signaling pathway	1	47	4	254	1.35	0.561	Q8CJF9	GO_BP
Cluster2	non-motile cilium assembly	1	47	1	254	5.4	0.185	Q9R0L6	GO_BP
Cluster2	Notch receptor processing	1	47	1	254	5.4	0.185	Q9Z0F8	GO_BP
Cluster2	nuclear export	2	47	8	254	1.35	0.454	Q3UYV9 Q9D824	GO_BP
Cluster2	nuclear migration	1	47	4	254	1.35	0.561	Q9R0L6	GO_BP
Cluster2	nuclear transport	2	47	10	254	1.08	0.582	Q3UYV9 Q9D824	GO_BP
Cluster2	nuclear-transcribed mRNA catabolic process	2	47	5	254	2.16	0.231	Q3UYV9 Q569Z6	GO_BP
Cluster2	nucleic acid metabolic process	18	47	69	254	1.41	0.0453	O08784 O09000 O70133 P11031 Q03172 Q3U5F4 Q3UH06 Q3UYV9 Q569Z6 Q6NV83 Q7TNC4 Q8BTI8 Q8CJF9 Q8VCD5 Q8VIJ6 Q99K70 Q9D0E1 Q9D824	GO_BP
Cluster2	nucleic acid phosphodiester bond hydrolysis	3	47	5	254	3.24	0.0454	Q3UYV9 Q8CJF9 Q9D824	GO_BP
Cluster2	nucleic acid transport	2	47	8	254	1.35	0.454	Q3UYV9 Q9D824	GO_BP
Cluster2	nucleic acid-templated transcription	10	47	26	254	2.08	0.00954	O08784 O09000 P11031 Q03172 Q3UH06 Q3UYV9 Q569Z6 Q8VCD5 Q99K70 Q9D824	GO_BP
Cluster2	nucleobase-containing compound catabolic process	3	47	6	254	2.7	0.079	Q3UYV9 Q569Z6 Q8CJF9	GO_BP
Cluster2	nucleobase-containing compound metabolic process	20	47	76	254	1.42	0.0295	O08784 O09000 O70133 P11031 Q03172 Q3U5F4 Q3UH06 Q3UYV9 Q569Z6 Q6NV83 Q7TNC4 Q8BTI8 Q8BVF2 Q8CJF9 Q8VCD5 Q8VIJ6 Q99K70 Q9D0E1 Q9D824 Q9Z0U1	GO_BP
Cluster2	nucleobase-containing compound transport	2	47	8	254	1.35	0.454	Q3UYV9 Q9D824	GO_BP
Cluster2	nucleocytoplasmic transport	2	47	10	254	1.08	0.582	Q3UYV9 Q9D824	GO_BP
Cluster2	nucleoside biosynthetic process	1	47	2	254	2.7	0.336	Q8BVF2	GO_BP
Cluster2	nucleoside diphosphate metabolic process	1	47	2	254	2.7	0.336	Q9Z0U1	GO_BP
Cluster2	nucleoside metabolic process	2	47	4	254	2.7	0.157	Q8BVF2 Q9Z0U1	GO_BP
Cluster2	nucleoside monophosphate metabolic process	1	47	2	254	2.7	0.336	Q9Z0U1	GO_BP
Cluster2	nucleoside monophosphate phosphorylation	1	47	2	254	2.7	0.336	Q9Z0U1	GO_BP
Cluster2	nucleoside phosphate biosynthetic process	1	47	6	254	0.9	0.711	Q9Z0U1	GO_BP
Cluster2	nucleoside phosphate metabolic process	1	47	6	254	0.9	0.711	Q9Z0U1	GO_BP
Cluster2	nucleotide biosynthetic process	1	47	6	254	0.9	0.711	Q9Z0U1	GO_BP
Cluster2	nucleotide metabolic process	1	47	6	254	0.9	0.711	Q9Z0U1	GO_BP
Cluster2	nucleus localization	1	47	4	254	1.35	0.561	Q9R0L6	GO_BP
Cluster2	oligodendrocyte development	1	47	1	254	5.4	0.185	Q61851	GO_BP
Cluster2	oligodendrocyte differentiation	1	47	1	254	5.4	0.185	Q61851	GO_BP
Cluster2	organ growth	1	47	1	254	5.4	0.185	Q61851	GO_BP
Cluster2	organelle assembly	5	47	13	254	2.08	0.07	A2AAY5 P60521 P62821 Q6P9S1 Q9R0L6	GO_BP
Cluster2	organelle disassembly	1	47	3	254	1.8	0.46	P60521	GO_BP
Cluster2	organelle fusion	1	47	1	254	5.4	0.185	Q9JKK1	GO_BP
Cluster2	organelle localization	3	47	16	254	1.01	0.597	P62821 Q9JKK1 Q9R0L6	GO_BP
Cluster2	organelle localization by membrane tethering	2	47	5	254	2.16	0.231	Q9JKK1 Q9R0L6	GO_BP
Cluster2	organelle membrane fusion	1	47	1	254	5.4	0.185	Q9JKK1	GO_BP
Cluster2	organelle organization	10	47	73	254	0.74	0.927	A2AAY5 A2AJI0 O09000 O70133 P60521 P62821 Q6P9S1 Q8VIJ6 Q9JKK1 Q9R0L6	GO_BP
Cluster2	organelle transport along microtubule	1	47	1	254	5.4	0.185	P62821	GO_BP
Cluster2	organic acid biosynthetic process	1	47	4	254	1.35	0.561	Q9DBS9	GO_BP
Cluster2	organic acid metabolic process	1	47	9	254	0.6	0.847	Q9DBS9	GO_BP
Cluster2	organic cyclic compound biosynthetic process	13	47	37	254	1.9	0.00706	O08784 O09000 P11031 Q03172 Q3UH06 Q3UYV9 Q569Z6 Q8BVF2 Q8VCD5 Q99K70 Q9D824 Q9DBS9 Q9Z0U1	GO_BP
Cluster2	organic cyclic compound catabolic process	3	47	6	254	2.7	0.079	Q3UYV9 Q569Z6 Q8CJF9	GO_BP
Cluster2	organic cyclic compound metabolic process	21	47	77	254	1.47	0.0155	O08784 O09000 O70133 P11031 Q03172 Q3U5F4 Q3UH06 Q3UYV9 Q569Z6 Q6NV83 Q7TNC4 Q8BTI8 Q8BVF2 Q8CJF9 Q8VCD5 Q8VIJ6 Q99K70 Q9D0E1 Q9D824 Q9DBS9 Q9Z0U1	GO_BP
Cluster2	organic hydroxy compound biosynthetic process	1	47	1	254	5.4	0.185	Q9DBS9	GO_BP
Cluster2	organic hydroxy compound metabolic process	1	47	1	254	5.4	0.185	Q9DBS9	GO_BP
Cluster2	organic hydroxy compound transport	1	47	2	254	2.7	0.336	Q9DBS9	GO_BP
Cluster2	organic substance biosynthetic process	16	47	50	254	1.73	0.0074	O08784 O09000 P11031 Q03172 Q05D44 Q3UH06 Q3UYV9 Q569Z6 Q61851 Q8BVF2 Q8VCD5 Q8VDZ4 Q99K70 Q9D824 Q9DBS9 Q9Z0U1	GO_BP
Cluster2	organic substance catabolic process	5	47	15	254	1.8	0.121	P97868 Q3UYV9 Q569Z6 Q8CJF9 Q9ES00	GO_BP
Cluster2	organic substance metabolic process	31	47	134	254	1.25	0.0317	A2ALK8 O08784 O09000 O70133 P11031 P62821 P97868 Q03172 Q05D44 Q3U5F4 Q3UH06 Q3UYV9 Q569Z6 Q61851 Q69Z38 Q6NV83 Q6PB70 Q7TNC4 Q8BTI8 Q8BVF2 Q8CJF9 Q8VCD5 Q8VDZ4 Q8VIJ6 Q99K70 Q9D0E1 Q9D824 Q9DBS9 Q9ES00 Q9Z0F8 Q9Z0U1	GO_BP
Cluster2	organic substance transport	5	47	27	254	1	0.586	P62821 Q3UYV9 Q9D824 Q9DBS9 Q9JKK1	GO_BP
Cluster2	organonitrogen compound biosynthetic process	3	47	12	254	1.35	0.389	Q05D44 Q8BVF2 Q8VDZ4	GO_BP
Cluster2	organonitrogen compound catabolic process	2	47	8	254	1.35	0.454	P97868 Q9ES00	GO_BP
Cluster2	organonitrogen compound metabolic process	15	47	77	254	1.05	0.459	A2ALK8 O09000 P62821 P97868 Q05D44 Q61851 Q69Z38 Q6PB70 Q8BVF2 Q8VCD5 Q8VDZ4 Q8VIJ6 Q9ES00 Q9Z0F8 Q9Z0U1	GO_BP
Cluster2	organophosphate biosynthetic process	2	47	10	254	1.08	0.582	Q61851 Q9Z0U1	GO_BP
Cluster2	organophosphate metabolic process	2	47	10	254	1.08	0.582	Q61851 Q9Z0U1	GO_BP
Cluster2	ossification	3	47	4	254	4.05	0.0209	A2AAY5 Q61122 Q61851	GO_BP
Cluster2	osteoblast differentiation	1	47	1	254	5.4	0.185	A2AAY5	GO_BP
Cluster2	osteoblast fate commitment	1	47	1	254	5.4	0.185	A2AAY5	GO_BP
Cluster2	oxidation-reduction process	1	47	8	254	0.68	0.81	A2AAY5	GO_BP
Cluster2	oxoacid metabolic process	1	47	9	254	0.6	0.847	Q9DBS9	GO_BP
Cluster2	p38MAPK cascade	1	47	1	254	5.4	0.185	Q61851	GO_BP
Cluster2	pallium development	1	47	3	254	1.8	0.46	Q9QZQ1	GO_BP
Cluster2	peptide biosynthetic process	1	47	7	254	0.77	0.766	Q05D44	GO_BP
Cluster2	peptide hormone secretion	1	47	2	254	2.7	0.336	P62821	GO_BP
Cluster2	peptide metabolic process	1	47	7	254	0.77	0.766	Q05D44	GO_BP
Cluster2	peptide secretion	1	47	2	254	2.7	0.336	P62821	GO_BP
Cluster2	peptide transport	4	47	24	254	0.9	0.685	P62821 Q3UYV9 Q9D824 Q9JKK1	GO_BP
Cluster2	peptidyl-amino acid modification	3	47	20	254	0.81	0.755	O09000 Q61851 Q69Z38	GO_BP
Cluster2	peptidyl-lysine acetylation	1	47	5	254	1.08	0.644	O09000	GO_BP
Cluster2	peptidyl-lysine modification	1	47	8	254	0.68	0.81	O09000	GO_BP
Cluster2	peptidyl-tyrosine dephosphorylation	1	47	2	254	2.7	0.336	A2ALK8	GO_BP
Cluster2	peptidyl-tyrosine modification	2	47	3	254	3.6	0.0889	Q61851 Q69Z38	GO_BP
Cluster2	peptidyl-tyrosine phosphorylation	2	47	3	254	3.6	0.0889	Q61851 Q69Z38	GO_BP
Cluster2	peripheral nervous system development	1	47	3	254	1.8	0.46	Q61122	GO_BP
Cluster2	phagocytosis	1	47	4	254	1.35	0.561	Q8BUR4	GO_BP
Cluster2	phagocytosis, engulfment	1	47	1	254	5.4	0.185	Q8BUR4	GO_BP
Cluster2	phosphate-containing compound metabolic process	4	47	31	254	0.7	0.868	A2ALK8 Q61851 Q69Z38 Q9Z0U1	GO_BP
Cluster2	phosphatidylinositol biosynthetic process	1	47	3	254	1.8	0.46	Q61851	GO_BP
Cluster2	phosphatidylinositol metabolic process	1	47	4	254	1.35	0.561	Q61851	GO_BP
Cluster2	phosphatidylinositol phosphorylation	1	47	3	254	1.8	0.46	Q61851	GO_BP
Cluster2	phospholipid biosynthetic process	1	47	4	254	1.35	0.561	Q61851	GO_BP
Cluster2	phospholipid metabolic process	1	47	4	254	1.35	0.561	Q61851	GO_BP
Cluster2	phosphorus metabolic process	4	47	32	254	0.68	0.885	A2ALK8 Q61851 Q69Z38 Q9Z0U1	GO_BP
Cluster2	phosphorylation	3	47	27	254	0.6	0.912	Q61851 Q69Z38 Q9Z0U1	GO_BP
Cluster2	pigment granule localization	1	47	1	254	5.4	0.185	P62821	GO_BP
Cluster2	pigment granule transport	1	47	1	254	5.4	0.185	P62821	GO_BP
Cluster2	pigmentation	1	47	3	254	1.8	0.46	P62821	GO_BP
Cluster2	placenta development	1	47	10	254	0.54	0.876	O09000	GO_BP
Cluster2	plasma membrane bounded cell projection assembly	2	47	8	254	1.35	0.454	Q6P9S1 Q9R0L6	GO_BP
Cluster2	plasma membrane invagination	1	47	1	254	5.4	0.185	Q8BUR4	GO_BP
Cluster2	podosome assembly	1	47	1	254	5.4	0.185	A2AAY5	GO_BP
Cluster2	polarized epithelial cell differentiation	1	47	2	254	2.7	0.336	E9Q9R9	GO_BP
Cluster2	positive regulation of adipose tissue development	1	47	1	254	5.4	0.185	A2AAY5	GO_BP
Cluster2	positive regulation of angiogenesis	1	47	4	254	1.35	0.561	Q8BVF2	GO_BP
Cluster2	positive regulation of apoptotic process	2	47	18	254	0.6	0.881	Q61851 Q8VIJ6	GO_BP
Cluster2	positive regulation of apoptotic signaling pathway	1	47	6	254	0.9	0.711	Q8VIJ6	GO_BP
Cluster2	positive regulation of ATPase activity	2	47	2	254	5.4	0.0336	O70133 P60521	GO_BP
Cluster2	positive regulation of binding	3	47	4	254	4.05	0.0209	O70133 Q3UYV9 Q6PGG6	GO_BP
Cluster2	positive regulation of biological process	22	47	121	254	0.98	0.613	A2AAY5 E9Q9R9 O09000 O70133 P11031 P62821 Q3UH06 Q3UYV9 Q569Z6 Q61851 Q6P9S1 Q6PD21 Q6PGG6 Q8BUR4 Q8BVF2 Q8CJF9 Q8VCD5 Q8VIJ6 Q99K70 Q9D0E1 Q9R0L6 Q9Z0F8	GO_BP
Cluster2	positive regulation of biosynthetic process	8	47	52	254	0.83	0.8	O09000 O70133 P11031 Q3UH06 Q569Z6 Q6P9S1 Q8VCD5 Q8VIJ6	GO_BP
Cluster2	positive regulation of bone mineralization	1	47	3	254	1.8	0.46	Q61851	GO_BP
Cluster2	positive regulation of catalytic activity	8	47	43	254	1.01	0.566	A2AAY5 O70133 P60521 P62821 Q61851 Q8BUR4 Q9QZQ1 Q9Z0F8	GO_BP
Cluster2	positive regulation of cell activation	1	47	8	254	0.68	0.81	Q6PD21	GO_BP
Cluster2	positive regulation of cell adhesion	3	47	7	254	2.32	0.12	Q3UH06 Q6PD21 Q8BUR4	GO_BP
Cluster2	positive regulation of cell communication	8	47	35	254	1.24	0.306	E9Q9R9 O09000 Q61851 Q6PD21 Q8CJF9 Q8VIJ6 Q99K70 Q9Z0F8	GO_BP
Cluster2	positive regulation of cell cycle	3	47	15	254	1.08	0.549	Q6PD21 Q8VIJ6 Q9Z0F8	GO_BP
Cluster2	positive regulation of cell cycle process	1	47	10	254	0.54	0.876	Q8VIJ6	GO_BP
Cluster2	positive regulation of cell death	2	47	19	254	0.57	0.9	Q61851 Q8VIJ6	GO_BP
Cluster2	positive regulation of cell development	3	47	11	254	1.47	0.332	E9Q9R9 Q3UH06 Q8BUR4	GO_BP
Cluster2	positive regulation of cell differentiation	7	47	20	254	1.89	0.0534	A2AAY5 E9Q9R9 O09000 Q3UH06 Q61851 Q6PD21 Q8BUR4	GO_BP
Cluster2	positive regulation of cell growth	3	47	6	254	2.7	0.079	O09000 Q3UYV9 Q9Z0F8	GO_BP
Cluster2	positive regulation of cell migration	3	47	14	254	1.16	0.498	Q3UH06 Q8BUR4 Q9Z0F8	GO_BP
Cluster2	positive regulation of cell motility	3	47	14	254	1.16	0.498	Q3UH06 Q8BUR4 Q9Z0F8	GO_BP
Cluster2	positive regulation of cell-cell adhesion	1	47	4	254	1.35	0.561	Q6PD21	GO_BP
Cluster2	positive regulation of cell-substrate adhesion	2	47	3	254	3.6	0.0889	Q3UH06 Q8BUR4	GO_BP
Cluster2	positive regulation of cellular component movement	3	47	14	254	1.16	0.498	Q3UH06 Q8BUR4 Q9Z0F8	GO_BP
Cluster2	positive regulation of cellular metabolic process	12	47	78	254	0.83	0.848	O09000 O70133 P11031 P62821 Q3UH06 Q3UYV9 Q569Z6 Q61851 Q6P9S1 Q8VCD5 Q8VIJ6 Q9Z0F8	GO_BP
Cluster2	positive regulation of cellular process	19	47	111	254	0.93	0.746	A2AAY5 E9Q9R9 O09000 O70133 P11031 P62821 Q3UH06 Q3UYV9 Q569Z6 Q61851 Q6P9S1 Q6PD21 Q8BUR4 Q8BVF2 Q8CJF9 Q8VCD5 Q8VIJ6 Q99K70 Q9Z0F8	GO_BP
Cluster2	positive regulation of chemokine production	1	47	1	254	5.4	0.185	Q9Z0F8	GO_BP
Cluster2	positive regulation of chemotaxis	1	47	3	254	1.8	0.46	Q9Z0F8	GO_BP
Cluster2	positive regulation of chromosome organization	1	47	7	254	0.77	0.766	Q8VIJ6	GO_BP
Cluster2	positive regulation of chromosome segregation	1	47	2	254	2.7	0.336	Q8VIJ6	GO_BP
Cluster2	positive regulation of cilium assembly	1	47	3	254	1.8	0.46	Q6P9S1	GO_BP
Cluster2	positive regulation of circadian rhythm	1	47	1	254	5.4	0.185	Q569Z6	GO_BP
Cluster2	positive regulation of cytokine production	2	47	7	254	1.54	0.382	O70133 Q9Z0F8	GO_BP
Cluster2	positive regulation of cytokine secretion	1	47	3	254	1.8	0.46	O70133	GO_BP
Cluster2	positive regulation of cytoplasmic translation	1	47	2	254	2.7	0.336	O70133	GO_BP
Cluster2	positive regulation of cytoskeleton organization	1	47	6	254	0.9	0.711	A2AAY5	GO_BP
Cluster2	positive regulation of defense response	2	47	6	254	1.8	0.308	O70133 Q8VIJ6	GO_BP
Cluster2	positive regulation of dendrite development	1	47	1	254	5.4	0.185	E9Q9R9	GO_BP
Cluster2	positive regulation of dendritic spine development	1	47	1	254	5.4	0.185	E9Q9R9	GO_BP
Cluster2	positive regulation of developmental growth	1	47	2	254	2.7	0.336	A2AAY5	GO_BP
Cluster2	positive regulation of developmental process	8	47	33	254	1.31	0.245	A2AAY5 E9Q9R9 O09000 Q3UH06 Q61851 Q6PD21 Q8BUR4 Q8BVF2	GO_BP
Cluster2	positive regulation of DNA metabolic process	1	47	6	254	0.9	0.711	O70133	GO_BP
Cluster2	positive regulation of DNA repair	1	47	1	254	5.4	0.185	O70133	GO_BP
Cluster2	positive regulation of DNA replication	1	47	2	254	2.7	0.336	O70133	GO_BP
Cluster2	positive regulation of endothelial cell migration	1	47	3	254	1.8	0.46	Q9Z0F8	GO_BP
Cluster2	positive regulation of epidermis development	1	47	1	254	5.4	0.185	O09000	GO_BP
Cluster2	positive regulation of epithelial cell migration	3	47	6	254	2.7	0.079	Q3UH06 Q8BUR4 Q9Z0F8	GO_BP
Cluster2	positive regulation of ERBB signaling pathway	1	47	2	254	2.7	0.336	Q9Z0F8	GO_BP
Cluster2	positive regulation of ERK1 and ERK2 cascade	2	47	6	254	1.8	0.308	Q61851 Q9Z0F8	GO_BP
Cluster2	positive regulation of fat cell differentiation	1	47	3	254	1.8	0.46	A2AAY5	GO_BP
Cluster2	positive regulation of fibroblast proliferation	1	47	2	254	2.7	0.336	O70133	GO_BP
Cluster2	positive regulation of gene expression	11	47	55	254	1.08	0.441	A2AAY5 O09000 O70133 P11031 Q3UH06 Q3UYV9 Q569Z6 Q6P9S1 Q8CJF9 Q8VCD5 Q8VIJ6	GO_BP
Cluster2	positive regulation of gene silencing by miRNA	1	47	3	254	1.8	0.46	O70133	GO_BP
Cluster2	positive regulation of growth	4	47	8	254	2.7	0.0409	A2AAY5 O09000 Q3UYV9 Q9Z0F8	GO_BP
Cluster2	positive regulation of GTPase activity	2	47	20	254	0.54	0.916	Q8BUR4 Q9QZQ1	GO_BP
Cluster2	positive regulation of hemopoiesis	1	47	5	254	1.08	0.644	Q6PD21	GO_BP
Cluster2	positive regulation of hippo signaling	1	47	1	254	5.4	0.185	E9Q9R9	GO_BP
Cluster2	positive regulation of hydrolase activity	5	47	30	254	0.9	0.689	O70133 P60521 Q61851 Q8BUR4 Q9QZQ1	GO_BP
Cluster2	positive regulation of immune effector process	1	47	4	254	1.35	0.561	Q6PD21	GO_BP
Cluster2	positive regulation of immune response	4	47	11	254	1.97	0.125	O70133 Q6PD21 Q8BUR4 Q8VIJ6	GO_BP
Cluster2	positive regulation of immune system process	5	47	17	254	1.59	0.186	O70133 Q6PD21 Q8BUR4 Q8VIJ6 Q9Z0F8	GO_BP
Cluster2	positive regulation of inflammatory response	1	47	3	254	1.8	0.46	O70133	GO_BP
Cluster2	positive regulation of innate immune response	2	47	3	254	3.6	0.0889	O70133 Q8VIJ6	GO_BP
Cluster2	positive regulation of interferon-alpha production	1	47	2	254	2.7	0.336	O70133	GO_BP
Cluster2	positive regulation of interferon-alpha secretion	1	47	1	254	5.4	0.185	O70133	GO_BP
Cluster2	positive regulation of interferon-beta production	1	47	1	254	5.4	0.185	O70133	GO_BP
Cluster2	positive regulation of interferon-beta secretion	1	47	1	254	5.4	0.185	O70133	GO_BP
Cluster2	positive regulation of interleukin-18 production	1	47	1	254	5.4	0.185	O70133	GO_BP
Cluster2	positive regulation of interleukin-6 production	1	47	3	254	1.8	0.46	O70133	GO_BP
Cluster2	positive regulation of interleukin-6 secretion	1	47	1	254	5.4	0.185	O70133	GO_BP
Cluster2	positive regulation of intracellular transport	2	47	7	254	1.54	0.382	O70133 Q9R0L6	GO_BP
Cluster2	positive regulation of isomerase activity	1	47	1	254	5.4	0.185	O70133	GO_BP
Cluster2	positive regulation of kinase activity	2	47	15	254	0.72	0.804	Q61851 Q9Z0F8	GO_BP
Cluster2	positive regulation of lamellipodium morphogenesis	1	47	1	254	5.4	0.185	Q3UH06	GO_BP
Cluster2	positive regulation of lamellipodium organization	1	47	1	254	5.4	0.185	Q3UH06	GO_BP
Cluster2	positive regulation of leukocyte activation	1	47	8	254	0.68	0.81	Q6PD21	GO_BP
Cluster2	positive regulation of leukocyte chemotaxis	1	47	3	254	1.8	0.46	Q9Z0F8	GO_BP
Cluster2	positive regulation of leukocyte differentiation	1	47	5	254	1.08	0.644	Q6PD21	GO_BP
Cluster2	positive regulation of leukocyte migration	1	47	3	254	1.8	0.46	Q9Z0F8	GO_BP
Cluster2	positive regulation of lipase activity	1	47	1	254	5.4	0.185	Q61851	GO_BP
Cluster2	positive regulation of lipid kinase activity	1	47	1	254	5.4	0.185	Q61851	GO_BP
Cluster2	positive regulation of lipid metabolic process	1	47	5	254	1.08	0.644	Q61851	GO_BP
Cluster2	positive regulation of locomotion	3	47	14	254	1.16	0.498	Q3UH06 Q8BUR4 Q9Z0F8	GO_BP
Cluster2	positive regulation of lymphocyte activation	1	47	7	254	0.77	0.766	Q6PD21	GO_BP
Cluster2	positive regulation of lymphocyte chemotaxis	1	47	1	254	5.4	0.185	Q9Z0F8	GO_BP
Cluster2	positive regulation of lymphocyte differentiation	1	47	3	254	1.8	0.46	Q6PD21	GO_BP
Cluster2	positive regulation of lymphocyte migration	1	47	1	254	5.4	0.185	Q9Z0F8	GO_BP
Cluster2	positive regulation of MAPK cascade	2	47	16	254	0.68	0.834	Q61851 Q9Z0F8	GO_BP
Cluster2	positive regulation of metabolic process	14	47	84	254	0.9	0.756	A2AAY5 O09000 O70133 P11031 P62821 Q3UH06 Q3UYV9 Q569Z6 Q61851 Q6P9S1 Q8CJF9 Q8VCD5 Q8VIJ6 Q9Z0F8	GO_BP
Cluster2	positive regulation of mitotic cell cycle	1	47	7	254	0.77	0.766	Q6PD21	GO_BP
Cluster2	positive regulation of molecular function	11	47	50	254	1.19	0.299	A2AAY5 O09000 O70133 P60521 P62821 Q3UYV9 Q61851 Q6PGG6 Q8BUR4 Q9QZQ1 Q9Z0F8	GO_BP
Cluster2	positive regulation of mRNA 3'-end processing	1	47	3	254	1.8	0.46	Q3UYV9	GO_BP
Cluster2	positive regulation of mRNA metabolic process	2	47	7	254	1.54	0.382	Q3UYV9 Q569Z6	GO_BP
Cluster2	positive regulation of mRNA processing	2	47	5	254	2.16	0.231	Q3UYV9 Q569Z6	GO_BP
Cluster2	positive regulation of multi-organism process	1	47	8	254	0.68	0.81	O70133	GO_BP
Cluster2	positive regulation of nervous system development	1	47	9	254	0.6	0.847	E9Q9R9	GO_BP
Cluster2	positive regulation of neurogenesis	1	47	8	254	0.68	0.81	E9Q9R9	GO_BP
Cluster2	positive regulation of neuron apoptotic process	1	47	3	254	1.8	0.46	Q61851	GO_BP
Cluster2	positive regulation of neuron death	1	47	3	254	1.8	0.46	Q61851	GO_BP
Cluster2	positive regulation of neuron differentiation	1	47	7	254	0.77	0.766	E9Q9R9	GO_BP
Cluster2	positive regulation of NIK/NF-kappaB signaling	1	47	1	254	5.4	0.185	Q8CJF9	GO_BP
Cluster2	positive regulation of non-motile cilium assembly	1	47	1	254	5.4	0.185	Q6P9S1	GO_BP
Cluster2	positive regulation of nucleocytoplasmic transport	1	47	4	254	1.35	0.561	O70133	GO_BP
Cluster2	positive regulation of organelle assembly	1	47	4	254	1.35	0.561	Q6P9S1	GO_BP
Cluster2	positive regulation of organelle organization	3	47	20	254	0.81	0.755	A2AAY5 Q6P9S1 Q8VIJ6	GO_BP
Cluster2	positive regulation of ossification	1	47	4	254	1.35	0.561	Q61851	GO_BP
Cluster2	positive regulation of peptide secretion	1	47	6	254	0.9	0.711	O70133	GO_BP
Cluster2	positive regulation of phosphate metabolic process	2	47	22	254	0.49	0.942	Q61851 Q9Z0F8	GO_BP
Cluster2	positive regulation of phospholipase activity	1	47	1	254	5.4	0.185	Q61851	GO_BP
Cluster2	positive regulation of phosphorylation	2	47	21	254	0.51	0.93	Q61851 Q9Z0F8	GO_BP
Cluster2	positive regulation of polysome binding	1	47	1	254	5.4	0.185	O70133	GO_BP
Cluster2	positive regulation of programmed cell death	2	47	18	254	0.6	0.881	Q61851 Q8VIJ6	GO_BP
Cluster2	positive regulation of protein binding	1	47	1	254	5.4	0.185	Q6PGG6	GO_BP
Cluster2	positive regulation of protein import	1	47	3	254	1.8	0.46	Q9D0E1	GO_BP
Cluster2	positive regulation of protein kinase activity	1	47	13	254	0.42	0.935	Q9Z0F8	GO_BP
Cluster2	positive regulation of protein kinase B signaling	1	47	3	254	1.8	0.46	Q61851	GO_BP
Cluster2	positive regulation of protein metabolic process	4	47	34	254	0.64	0.913	O70133 P62821 Q61851 Q9Z0F8	GO_BP
Cluster2	positive regulation of protein phosphorylation	2	47	20	254	0.54	0.916	Q61851 Q9Z0F8	GO_BP
Cluster2	positive regulation of protein secretion	1	47	6	254	0.9	0.711	O70133	GO_BP
Cluster2	positive regulation of protein transport	3	47	11	254	1.47	0.332	O70133 Q9D0E1 Q9R0L6	GO_BP
[truncated: 6,054 more rows]

## Sheet: GO.CC
Table SIV. GO cellular component enrichment analysis by cluster.
Cluster	Terms	Mapping	All.mapping	Background	All.background	Fold.enrich	P-value	Protein.IDs	Type
Cluster1	adherens junction	1	38	12	255	0.56	0.862	Q62433	GO_CC
Cluster1	alpha DNA polymerase:primase complex	1	38	1	255	6.71	0.149	P33611	GO_CC
Cluster1	aminoacyl-tRNA synthetase multienzyme complex	1	38	1	255	6.71	0.149	Q99MN1	GO_CC
Cluster1	anchoring junction	1	38	13	255	0.52	0.884	Q62433	GO_CC
Cluster1	apical junction complex	1	38	8	255	0.84	0.73	Q9Z0U1	GO_CC
Cluster1	apical part of cell	1	38	8	255	0.84	0.73	Q9R0L6	GO_CC
Cluster1	asymmetric synapse	1	38	6	255	1.12	0.624	O35625	GO_CC
Cluster1	autolysosome	1	38	1	255	6.71	0.149	P09528	GO_CC
Cluster1	autophagosome	1	38	2	255	3.36	0.276	P09528	GO_CC
Cluster1	beta-catenin destruction complex	1	38	1	255	6.71	0.149	O35625	GO_CC
Cluster1	bicellular tight junction	1	38	5	255	1.34	0.557	Q9Z0U1	GO_CC
Cluster1	bounding membrane of organelle	4	38	18	255	1.49	0.271	Q62433 Q8K1M6 Q8R1Q8 Q9CR57	GO_CC
Cluster1	catalytic complex	9	38	42	255	1.44	0.144	P09103 P33611 Q0VBL3 Q52KI8 Q8BWJ3 Q8K2T8 Q8N7N5 Q8R0F5 Q8R1Q8	GO_CC
Cluster1	catalytic step 2 spliceosome	2	38	8	255	1.68	0.34	Q52KI8 Q8R0F5	GO_CC
Cluster1	Cdc73/Paf1 complex	1	38	2	255	3.36	0.276	Q8K2T8	GO_CC
Cluster1	cell	38	38	253	255	1.01	0.724	A2AR02 E9Q5F9 O08784 O35625 P09103 P09528 P33611 P49717 P57776 P62751 Q0VBL3 Q4FK66 Q52KI8 Q61083 Q62433 Q6NV83 Q6P1G2 Q6P5F6 Q7TSC1 Q8BKG3 Q8BKI2 Q8BTW9 Q8BWJ3 Q8K0F1 Q8K1M6 Q8K2T8 Q8K4E0 Q8N7N5 Q8R0F5 Q8R1Q8 Q924A2 Q99MN1 Q99PL5 Q9CR57 Q9D281 Q9R0L6 Q9R1C7 Q9Z0U1	GO_CC
Cluster1	cell cortex	1	38	5	255	1.34	0.557	O35625	GO_CC
Cluster1	cell junction	4	38	23	255	1.17	0.458	Q62433 Q8BKG3 Q8K2T8 Q9Z0U1	GO_CC
Cluster1	cell periphery	8	38	64	255	0.84	0.793	O35625 P09103 Q62433 Q6P5F6 Q7TSC1 Q8BKG3 Q8R1Q8 Q9Z0U1	GO_CC
Cluster1	cell projection	2	38	34	255	0.39	0.978	Q8K4E0 Q9R0L6	GO_CC
Cluster1	cell surface	2	38	7	255	1.92	0.28	P09103 Q9Z0U1	GO_CC
Cluster1	cell-cell junction	3	38	19	255	1.06	0.561	Q62433 Q8BKG3 Q9Z0U1	GO_CC
Cluster1	centriolar satellite	1	38	2	255	3.36	0.276	Q9R0L6	GO_CC
Cluster1	centriole	2	38	3	255	4.47	0.0589	Q8K4E0 Q9R0L6	GO_CC
Cluster1	centrosome	4	38	11	255	2.44	0.0638	Q62433 Q8K4E0 Q8R1Q8 Q9R0L6	GO_CC
Cluster1	chromosomal region	1	38	6	255	1.12	0.624	Q8R1Q8	GO_CC
Cluster1	chromosome	3	38	25	255	0.81	0.756	E9Q5F9 P33611 Q8R1Q8	GO_CC
Cluster1	chromosome, centromeric region	1	38	6	255	1.12	0.624	Q8R1Q8	GO_CC
Cluster1	ciliary basal body	2	38	4	255	3.36	0.107	Q8K4E0 Q9R0L6	GO_CC
Cluster1	ciliary transition zone	1	38	1	255	6.71	0.149	Q9R0L6	GO_CC
Cluster1	cilium	2	38	6	255	2.24	0.22	Q8K4E0 Q9R0L6	GO_CC
Cluster1	Cul4-RING E3 ubiquitin ligase complex	1	38	1	255	6.71	0.149	Q8N7N5	GO_CC
Cluster1	cullin-RING ubiquitin ligase complex	1	38	2	255	3.36	0.276	Q8N7N5	GO_CC
Cluster1	cytoplasm	28	38	190	255	0.99	0.636	A2AR02 O08784 O35625 P09103 P09528 P33611 P57776 P62751 Q52KI8 Q61083 Q62433 Q7TSC1 Q8BKI2 Q8BTW9 Q8BWJ3 Q8K0F1 Q8K1M6 Q8K2T8 Q8K4E0 Q8N7N5 Q8R1Q8 Q99MN1 Q99PL5 Q9CR57 Q9D281 Q9R0L6 Q9R1C7 Q9Z0U1	GO_CC
Cluster1	cytoplasmic dynein complex	1	38	1	255	6.71	0.149	Q8R1Q8	GO_CC
Cluster1	cytoplasmic region	1	38	7	255	0.96	0.682	O35625	GO_CC
Cluster1	cytoplasmic side of endoplasmic reticulum membrane	1	38	1	255	6.71	0.149	Q9CR57	GO_CC
Cluster1	cytoplasmic side of membrane	1	38	5	255	1.34	0.557	Q9CR57	GO_CC
Cluster1	cytoplasmic vesicle	4	38	33	255	0.81	0.764	O35625 P09528 Q62433 Q8R1Q8	GO_CC
Cluster1	cytoplasmic vesicle lumen	1	38	4	255	1.68	0.478	P09528	GO_CC
Cluster1	cytoplasmic vesicle membrane	1	38	9	255	0.75	0.772	Q8R1Q8	GO_CC
Cluster1	cytoskeleton	5	38	42	255	0.8	0.794	Q62433 Q8K1M6 Q8K4E0 Q8R1Q8 Q9R0L6	GO_CC
Cluster1	cytosol	22	38	131	255	1.13	0.244	A2AR02 O08784 O35625 P33611 P57776 P62751 Q52KI8 Q61083 Q62433 Q7TSC1 Q8BKI2 Q8BWJ3 Q8K1M6 Q8K4E0 Q8N7N5 Q8R1Q8 Q99MN1 Q9CR57 Q9D281 Q9R0L6 Q9R1C7 Q9Z0U1	GO_CC
Cluster1	cytosolic large ribosomal subunit	2	38	2	255	6.71	0.0217	P62751 Q9CR57	GO_CC
Cluster1	cytosolic ribosome	2	38	2	255	6.71	0.0217	P62751 Q9CR57	GO_CC
Cluster1	DNA-directed RNA polymerase complex	2	38	5	255	2.68	0.162	P33611 Q8K2T8	GO_CC
Cluster1	dynein complex	1	38	1	255	6.71	0.149	Q8R1Q8	GO_CC
Cluster1	endocytic vesicle	1	38	2	255	3.36	0.276	P09528	GO_CC
Cluster1	endocytic vesicle lumen	1	38	1	255	6.71	0.149	P09528	GO_CC
Cluster1	endomembrane system	11	38	62	255	1.19	0.297	P09103 Q4FK66 Q62433 Q8BTW9 Q8K0F1 Q8K1M6 Q8R1Q8 Q99PL5 Q9CR57 Q9D281 Q9R0L6	GO_CC
Cluster1	endoplasmic reticulum	4	38	21	255	1.28	0.383	P09103 Q8K1M6 Q99PL5 Q9CR57	GO_CC
Cluster1	endoplasmic reticulum chaperone complex	1	38	1	255	6.71	0.149	P09103	GO_CC
Cluster1	endoplasmic reticulum lumen	1	38	3	255	2.24	0.385	P09103	GO_CC
Cluster1	endoplasmic reticulum membrane	3	38	10	255	2.01	0.174	Q8K1M6 Q99PL5 Q9CR57	GO_CC
Cluster1	endoplasmic reticulum subcompartment	3	38	10	255	2.01	0.174	Q8K1M6 Q99PL5 Q9CR57	GO_CC
Cluster1	endosome	1	38	16	255	0.42	0.931	Q62433	GO_CC
Cluster1	endosome membrane	1	38	5	255	1.34	0.557	Q62433	GO_CC
Cluster1	envelope	3	38	14	255	1.44	0.347	Q4FK66 Q8K1M6 Q9R0L6	GO_CC
Cluster1	external side of plasma membrane	1	38	1	255	6.71	0.149	P09103	GO_CC
Cluster1	extracellular region	3	38	12	255	1.68	0.258	P09103 P09528 Q99MN1	GO_CC
Cluster1	extracellular space	1	38	3	255	2.24	0.385	Q99MN1	GO_CC
Cluster1	fibrillar center	2	38	9	255	1.49	0.398	O08784 P57776	GO_CC
Cluster1	ficolin-1-rich granule	1	38	3	255	2.24	0.385	Q8R1Q8	GO_CC
Cluster1	ficolin-1-rich granule membrane	1	38	1	255	6.71	0.149	Q8R1Q8	GO_CC
Cluster1	gap junction	1	38	1	255	6.71	0.149	Q9Z0U1	GO_CC
Cluster1	Golgi apparatus	4	38	24	255	1.12	0.495	Q8BTW9 Q8K0F1 Q8K1M6 Q9D281	GO_CC
Cluster1	Golgi apparatus subcompartment	1	38	8	255	0.84	0.73	Q8K0F1	GO_CC
Cluster1	integral component of membrane	3	38	16	255	1.26	0.436	Q6P5F6 Q8BKG3 Q99PL5	GO_CC
Cluster1	integral component of plasma membrane	2	38	9	255	1.49	0.398	Q6P5F6 Q8BKG3	GO_CC
Cluster1	intracellular	36	38	247	255	0.98	0.9	A2AR02 E9Q5F9 O08784 O35625 P09103 P09528 P33611 P49717 P57776 P62751 Q0VBL3 Q4FK66 Q52KI8 Q61083 Q62433 Q6NV83 Q6P1G2 Q7TSC1 Q8BKI2 Q8BTW9 Q8BWJ3 Q8K0F1 Q8K1M6 Q8K2T8 Q8K4E0 Q8N7N5 Q8R0F5 Q8R1Q8 Q924A2 Q99MN1 Q99PL5 Q9CR57 Q9D281 Q9R0L6 Q9R1C7 Q9Z0U1	GO_CC
Cluster1	intracellular membrane-bounded organelle	32	38	191	255	1.12	0.106	A2AR02 E9Q5F9 O08784 O35625 P09103 P09528 P33611 P49717 P57776 P62751 Q0VBL3 Q4FK66 Q52KI8 Q61083 Q62433 Q6NV83 Q6P1G2 Q7TSC1 Q8BTW9 Q8K0F1 Q8K1M6 Q8K2T8 Q8N7N5 Q8R0F5 Q924A2 Q99MN1 Q99PL5 Q9CR57 Q9D281 Q9R0L6 Q9R1C7 Q9Z0U1	GO_CC
Cluster1	intracellular non-membrane-bounded organelle	12	38	87	255	0.93	0.703	E9Q5F9 O08784 P33611 P57776 P62751 Q62433 Q8K1M6 Q8K4E0 Q8R1Q8 Q99PL5 Q9CR57 Q9R0L6	GO_CC
Cluster1	intracellular organelle	34	38	220	255	1.04	0.373	A2AR02 E9Q5F9 O08784 O35625 P09103 P09528 P33611 P49717 P57776 P62751 Q0VBL3 Q4FK66 Q52KI8 Q61083 Q62433 Q6NV83 Q6P1G2 Q7TSC1 Q8BTW9 Q8K0F1 Q8K1M6 Q8K2T8 Q8K4E0 Q8N7N5 Q8R0F5 Q8R1Q8 Q924A2 Q99MN1 Q99PL5 Q9CR57 Q9D281 Q9R0L6 Q9R1C7 Q9Z0U1	GO_CC
Cluster1	intracellular organelle lumen	21	38	134	255	1.05	0.427	A2AR02 E9Q5F9 O08784 P09103 P09528 P33611 P49717 P57776 Q0VBL3 Q52KI8 Q61083 Q6NV83 Q6P1G2 Q7TSC1 Q8K2T8 Q8N7N5 Q924A2 Q99MN1 Q9D281 Q9R1C7 Q9Z0U1	GO_CC
Cluster1	intracellular vesicle	4	38	33	255	0.81	0.764	O35625 P09528 Q62433 Q8R1Q8	GO_CC
Cluster1	intrinsic component of membrane	3	38	16	255	1.26	0.436	Q6P5F6 Q8BKG3 Q99PL5	GO_CC
Cluster1	intrinsic component of plasma membrane	2	38	9	255	1.49	0.398	Q6P5F6 Q8BKG3	GO_CC
Cluster1	kinetochore	1	38	5	255	1.34	0.557	Q8R1Q8	GO_CC
Cluster1	large ribosomal subunit	2	38	2	255	6.71	0.0217	P62751 Q9CR57	GO_CC
Cluster1	lateral plasma membrane	1	38	1	255	6.71	0.149	O35625	GO_CC
Cluster1	lysosome	1	38	7	255	0.96	0.682	P09528	GO_CC
Cluster1	lytic vacuole	1	38	7	255	0.96	0.682	P09528	GO_CC
Cluster1	MCM complex	1	38	1	255	6.71	0.149	P49717	GO_CC
Cluster1	membrane	14	38	96	255	0.98	0.611	O35625 P09103 Q4FK66 Q62433 Q6P5F6 Q7TSC1 Q8BKG3 Q8K1M6 Q8K2T8 Q8R1Q8 Q99PL5 Q9CR57 Q9R0L6 Q9Z0U1	GO_CC
Cluster1	membrane-bounded organelle	33	38	202	255	1.1	0.148	A2AR02 E9Q5F9 O08784 O35625 P09103 P09528 P33611 P49717 P57776 P62751 Q0VBL3 Q4FK66 Q52KI8 Q61083 Q62433 Q6NV83 Q6P1G2 Q7TSC1 Q8BTW9 Q8K0F1 Q8K1M6 Q8K2T8 Q8N7N5 Q8R0F5 Q8R1Q8 Q924A2 Q99MN1 Q99PL5 Q9CR57 Q9D281 Q9R0L6 Q9R1C7 Q9Z0U1	GO_CC
Cluster1	membrane-enclosed lumen	21	38	134	255	1.05	0.427	A2AR02 E9Q5F9 O08784 P09103 P09528 P33611 P49717 P57776 Q0VBL3 Q52KI8 Q61083 Q6NV83 Q6P1G2 Q7TSC1 Q8K2T8 Q8N7N5 Q924A2 Q99MN1 Q9D281 Q9R1C7 Q9Z0U1	GO_CC
Cluster1	methyltransferase complex	1	38	5	255	1.34	0.557	Q0VBL3	GO_CC
Cluster1	microbody	1	38	1	255	6.71	0.149	Q8K1M6	GO_CC
Cluster1	microtubule	2	38	6	255	2.24	0.22	Q62433 Q8K1M6	GO_CC
Cluster1	microtubule associated complex	1	38	4	255	1.68	0.478	Q8R1Q8	GO_CC
Cluster1	microtubule cytoskeleton	5	38	29	255	1.16	0.441	Q62433 Q8K1M6 Q8K4E0 Q8R1Q8 Q9R0L6	GO_CC
Cluster1	microtubule organizing center	4	38	17	255	1.58	0.236	Q62433 Q8K4E0 Q8R1Q8 Q9R0L6	GO_CC
Cluster1	mitochondrial envelope	1	38	4	255	1.68	0.478	Q8K1M6	GO_CC
Cluster1	mitochondrial matrix	1	38	1	255	6.71	0.149	Q99MN1	GO_CC
Cluster1	mitochondrial membrane	1	38	4	255	1.68	0.478	Q8K1M6	GO_CC
Cluster1	mitochondrial outer membrane	1	38	2	255	3.36	0.276	Q8K1M6	GO_CC
Cluster1	mitochondrion	3	38	18	255	1.12	0.521	Q8K1M6 Q8N7N5 Q99MN1	GO_CC
Cluster1	mRNA editing complex	1	38	3	255	2.24	0.385	Q0VBL3	GO_CC
Cluster1	myelin sheath	1	38	4	255	1.68	0.478	Q62433	GO_CC
Cluster1	neuron to neuron synapse	1	38	6	255	1.12	0.624	O35625	GO_CC
Cluster1	non-membrane-bounded organelle	12	38	87	255	0.93	0.703	E9Q5F9 O08784 P33611 P57776 P62751 Q62433 Q8K1M6 Q8K4E0 Q8R1Q8 Q99PL5 Q9CR57 Q9R0L6	GO_CC
Cluster1	nuclear body	4	38	38	255	0.71	0.859	A2AR02 Q0VBL3 Q52KI8 Q9R1C7	GO_CC
Cluster1	nuclear chromosome	1	38	11	255	0.61	0.837	P33611	GO_CC
Cluster1	nuclear DNA-directed RNA polymerase complex	2	38	5	255	2.68	0.162	P33611 Q8K2T8	GO_CC
Cluster1	nuclear envelope	2	38	10	255	1.34	0.455	Q4FK66 Q9R0L6	GO_CC
Cluster1	nuclear lumen	18	38	127	255	0.95	0.692	A2AR02 E9Q5F9 O08784 P33611 P49717 P57776 Q0VBL3 Q52KI8 Q61083 Q6NV83 Q6P1G2 Q7TSC1 Q8K2T8 Q8N7N5 Q924A2 Q9D281 Q9R1C7 Q9Z0U1	GO_CC
Cluster1	nuclear matrix	3	38	9	255	2.24	0.135	A2AR02 Q52KI8 Q9R1C7	GO_CC
Cluster1	nuclear membrane	2	38	8	255	1.68	0.34	Q4FK66 Q9R0L6	GO_CC
Cluster1	nuclear periphery	3	38	10	255	2.01	0.174	A2AR02 Q52KI8 Q9R1C7	GO_CC
Cluster1	nuclear replication fork	1	38	1	255	6.71	0.149	P33611	GO_CC
Cluster1	nuclear replisome	1	38	1	255	6.71	0.149	P33611	GO_CC
Cluster1	nuclear speck	4	38	21	255	1.28	0.383	A2AR02 Q0VBL3 Q52KI8 Q9R1C7	GO_CC
Cluster1	nucleolus	2	38	22	255	0.61	0.872	O08784 P57776	GO_CC
Cluster1	nucleoplasm	16	38	115	255	0.93	0.717	A2AR02 E9Q5F9 P33611 P49717 Q0VBL3 Q52KI8 Q61083 Q6NV83 Q6P1G2 Q7TSC1 Q8K2T8 Q8N7N5 Q924A2 Q9D281 Q9R1C7 Q9Z0U1	GO_CC
Cluster1	nucleus	25	38	165	255	1.02	0.518	A2AR02 E9Q5F9 O08784 O35625 P33611 P49717 P57776 P62751 Q0VBL3 Q4FK66 Q52KI8 Q61083 Q62433 Q6NV83 Q6P1G2 Q7TSC1 Q8K2T8 Q8N7N5 Q8R0F5 Q924A2 Q99MN1 Q9D281 Q9R0L6 Q9R1C7 Q9Z0U1	GO_CC
Cluster1	organelle	34	38	222	255	1.03	0.431	A2AR02 E9Q5F9 O08784 O35625 P09103 P09528 P33611 P49717 P57776 P62751 Q0VBL3 Q4FK66 Q52KI8 Q61083 Q62433 Q6NV83 Q6P1G2 Q7TSC1 Q8BTW9 Q8K0F1 Q8K1M6 Q8K2T8 Q8K4E0 Q8N7N5 Q8R0F5 Q8R1Q8 Q924A2 Q99MN1 Q99PL5 Q9CR57 Q9D281 Q9R0L6 Q9R1C7 Q9Z0U1	GO_CC
Cluster1	organelle envelope	3	38	14	255	1.44	0.347	Q4FK66 Q8K1M6 Q9R0L6	GO_CC
Cluster1	organelle lumen	21	38	134	255	1.05	0.427	A2AR02 E9Q5F9 O08784 P09103 P09528 P33611 P49717 P57776 Q0VBL3 Q52KI8 Q61083 Q6NV83 Q6P1G2 Q7TSC1 Q8K2T8 Q8N7N5 Q924A2 Q99MN1 Q9D281 Q9R1C7 Q9Z0U1	GO_CC
Cluster1	organelle membrane	6	38	32	255	1.26	0.335	Q4FK66 Q62433 Q8K1M6 Q8R1Q8 Q9CR57 Q9R0L6	GO_CC
Cluster1	organelle outer membrane	1	38	2	255	3.36	0.276	Q8K1M6	GO_CC
Cluster1	organelle subcompartment	4	38	16	255	1.68	0.201	Q8K0F1 Q8K1M6 Q99PL5 Q9CR57	GO_CC
Cluster1	outer membrane	1	38	2	255	3.36	0.276	Q8K1M6	GO_CC
Cluster1	oxidoreductase complex	1	38	1	255	6.71	0.149	P09103	GO_CC
Cluster1	pericentriolar material	1	38	1	255	6.71	0.149	Q9R0L6	GO_CC
Cluster1	perinuclear region of cytoplasm	3	38	17	255	1.18	0.479	O35625 Q62433 Q8K1M6	GO_CC
Cluster1	peroxisome	1	38	1	255	6.71	0.149	Q8K1M6	GO_CC
Cluster1	phosphorylase kinase complex	1	38	1	255	6.71	0.149	Q8BWJ3	GO_CC
Cluster1	plasma membrane	8	38	63	255	0.85	0.776	O35625 P09103 Q62433 Q6P5F6 Q7TSC1 Q8BKG3 Q8R1Q8 Q9Z0U1	GO_CC
Cluster1	plasma membrane bounded cell projection	2	38	34	255	0.39	0.978	Q8K4E0 Q9R0L6	GO_CC
Cluster1	polymeric cytoskeletal fiber	2	38	8	255	1.68	0.34	Q62433 Q8K1M6	GO_CC
Cluster1	postsynapse	1	38	8	255	0.84	0.73	O35625	GO_CC
Cluster1	postsynaptic density	1	38	6	255	1.12	0.624	O35625	GO_CC
Cluster1	postsynaptic specialization	1	38	6	255	1.12	0.624	O35625	GO_CC
Cluster1	precatalytic spliceosome	2	38	2	255	6.71	0.0217	Q4FK66 Q8R0F5	GO_CC
Cluster1	prespliceosome	1	38	2	255	3.36	0.276	Q9R1C7	GO_CC
Cluster1	procollagen-proline 4-dioxygenase complex	1	38	1	255	6.71	0.149	P09103	GO_CC
Cluster1	protein kinase complex	1	38	5	255	1.34	0.557	Q8BWJ3	GO_CC
Cluster1	protein-containing complex	20	38	117	255	1.15	0.233	O35625 P09103 P33611 P49717 P62751 Q0VBL3 Q4FK66 Q52KI8 Q8BWJ3 Q8K1M6 Q8K2T8 Q8N7N5 Q8R0F5 Q8R1Q8 Q924A2 Q99MN1 Q99PL5 Q9CR57 Q9R0L6 Q9R1C7	GO_CC
Cluster1	protein-DNA complex	1	38	3	255	2.24	0.385	P33611	GO_CC
Cluster1	recycling endosome	1	38	5	255	1.34	0.557	Q62433	GO_CC
Cluster1	recycling endosome membrane	1	38	2	255	3.36	0.276	Q62433	GO_CC
Cluster1	replication fork	1	38	3	255	2.24	0.385	P33611	GO_CC
Cluster1	replisome	1	38	1	255	6.71	0.149	P33611	GO_CC
Cluster1	RES complex	1	38	2	255	3.36	0.276	Q8R0F5	GO_CC
Cluster1	ribonucleoprotein complex	7	38	29	255	1.62	0.117	P62751 Q4FK66 Q52KI8 Q8R0F5 Q99PL5 Q9CR57 Q9R1C7	GO_CC
Cluster1	ribosomal subunit	2	38	2	255	6.71	0.0217	P62751 Q9CR57	GO_CC
Cluster1	ribosome	3	38	5	255	4.03	0.0248	P62751 Q99PL5 Q9CR57	GO_CC
Cluster1	RNA N6-methyladenosine methyltransferase complex	1	38	3	255	2.24	0.385	Q0VBL3	GO_CC
Cluster1	RNA polymerase complex	2	38	5	255	2.68	0.162	P33611 Q8K2T8	GO_CC
Cluster1	RNA polymerase II, holoenzyme	1	38	4	255	1.68	0.478	Q8K2T8	GO_CC
Cluster1	rough endoplasmic reticulum	1	38	2	255	3.36	0.276	Q9CR57	GO_CC
Cluster1	rough endoplasmic reticulum membrane	1	38	1	255	6.71	0.149	Q9CR57	GO_CC
Cluster1	secondary lysosome	1	38	1	255	6.71	0.149	P09528	GO_CC
Cluster1	secretory granule	1	38	9	255	0.75	0.772	Q8R1Q8	GO_CC
Cluster1	secretory granule membrane	1	38	2	255	3.36	0.276	Q8R1Q8	GO_CC
Cluster1	secretory vesicle	1	38	11	255	0.61	0.837	Q8R1Q8	GO_CC
Cluster1	serine/threonine protein kinase complex	1	38	2	255	3.36	0.276	Q8BWJ3	GO_CC
Cluster1	side of membrane	2	38	6	255	2.24	0.22	P09103 Q9CR57	GO_CC
Cluster1	Sm-like protein family complex	2	38	4	255	3.36	0.107	Q8R0F5 Q9R1C7	GO_CC
Cluster1	small nuclear ribonucleoprotein complex	2	38	4	255	3.36	0.107	Q8R0F5 Q9R1C7	GO_CC
Cluster1	spindle	2	38	8	255	1.68	0.34	Q8K4E0 Q8R1Q8	GO_CC
Cluster1	spindle pole	2	38	3	255	4.47	0.0589	Q8K4E0 Q8R1Q8	GO_CC
Cluster1	spliceosomal complex	4	38	13	255	2.06	0.11	Q4FK66 Q52KI8 Q8R0F5 Q9R1C7	GO_CC
Cluster1	spliceosomal snRNP complex	2	38	3	255	4.47	0.0589	Q8R0F5 Q9R1C7	GO_CC
Cluster1	supramolecular complex	2	38	10	255	1.34	0.455	Q62433 Q8K1M6	GO_CC
Cluster1	supramolecular fiber	2	38	10	255	1.34	0.455	Q62433 Q8K1M6	GO_CC
Cluster1	supramolecular polymer	2	38	10	255	1.34	0.455	Q62433 Q8K1M6	GO_CC
Cluster1	synapse	1	38	15	255	0.45	0.918	O35625	GO_CC
Cluster1	tertiary granule	1	38	1	255	6.71	0.149	Q8R1Q8	GO_CC
Cluster1	tight junction	1	38	5	255	1.34	0.557	Q9Z0U1	GO_CC
Cluster1	trans-Golgi network	1	38	5	255	1.34	0.557	Q8K0F1	GO_CC
Cluster1	transcription elongation factor complex	1	38	2	255	3.36	0.276	Q8K2T8	GO_CC
Cluster1	transferase complex	5	38	23	255	1.46	0.244	P33611 Q0VBL3 Q8BWJ3 Q8K2T8 Q8N7N5	GO_CC
Cluster1	U1 snRNP	1	38	2	255	3.36	0.276	Q9R1C7	GO_CC
Cluster1	U2 snRNP	1	38	1	255	6.71	0.149	Q8R0F5	GO_CC
Cluster1	U2-type prespliceosome	1	38	2	255	3.36	0.276	Q9R1C7	GO_CC
Cluster1	U2-type spliceosomal complex	1	38	3	255	2.24	0.385	Q9R1C7	GO_CC
Cluster1	ubiquitin ligase complex	1	38	4	255	1.68	0.478	Q8N7N5	GO_CC
Cluster1	vacuole	1	38	8	255	0.84	0.73	P09528	GO_CC
Cluster1	vesicle	4	38	35	255	0.77	0.807	O35625 P09528 Q62433 Q8R1Q8	GO_CC
Cluster1	vesicle lumen	1	38	4	255	1.68	0.478	P09528	GO_CC
Cluster1	vesicle membrane	1	38	10	255	0.67	0.807	Q8R1Q8	GO_CC
Cluster1	whole membrane	3	38	22	255	0.92	0.668	Q62433 Q8K1M6 Q8R1Q8	GO_CC
Cluster1	Wnt signalosome	1	38	2	255	3.36	0.276	O35625	GO_CC
Cluster2	actin cytoskeleton	4	49	10	255	2.08	0.103	A2AAY5 O70133 Q69Z38 Q9Z0F8	GO_CC
Cluster2	adherens junction	3	49	12	255	1.3	0.415	E9Q9R9 Q69Z38 Q9QZQ1	GO_CC
Cluster2	anchoring junction	3	49	13	255	1.2	0.471	E9Q9R9 Q69Z38 Q9QZQ1	GO_CC
Cluster2	apical junction complex	2	49	8	255	1.3	0.475	Q9QZQ1 Q9Z0U1	GO_CC
Cluster2	apical part of cell	3	49	8	255	1.95	0.183	Q9QZQ1 Q9R0L6 Q9Z0F8	GO_CC
Cluster2	apical plasma membrane	1	49	6	255	0.87	0.726	Q9Z0F8	GO_CC
Cluster2	asymmetric synapse	1	49	6	255	0.87	0.726	E9Q9R9	GO_CC
Cluster2	autophagosome	1	49	2	255	2.6	0.348	P60521	GO_CC
Cluster2	autophagosome membrane	1	49	1	255	5.2	0.192	P60521	GO_CC
Cluster2	axon	1	49	10	255	0.52	0.887	Q9JKK1	GO_CC
Cluster2	axon terminus	1	49	2	255	2.6	0.348	Q9JKK1	GO_CC
Cluster2	bicellular tight junction	1	49	5	255	1.04	0.659	Q9Z0U1	GO_CC
Cluster2	bounding membrane of organelle	5	49	18	255	1.45	0.249	P60521 P62821 Q6NVE8 Q99K70 Q9JKK1	GO_CC
Cluster2	Cajal body	1	49	3	255	1.73	0.474	Q8BTI8	GO_CC
Cluster2	catalytic complex	6	49	42	255	0.74	0.866	O70133 Q8BTI8 Q8CJF9 Q8VCD5 Q9D0E1 Q9ES00	GO_CC
Cluster2	catalytic step 2 spliceosome	2	49	8	255	1.3	0.475	Q8BTI8 Q9D0E1	GO_CC
Cluster2	cell	49	49	253	255	1.01	0.652	A2AAY5 A2AJI0 A2ALK8 B1AZP2 E9Q9R9 F8VPU2 O08784 O09000 O70133 P11031 P60521 P62821 P97868 Q03172 Q05D44 Q3U5F4 Q3UH06 Q3UYV9 Q569Z6 Q61122 Q61851 Q69Z38 Q6NV83 Q6NVE8 Q6P9S1 Q6PB70 Q6PD21 Q6PGG6 Q7TNC4 Q8BTI8 Q8BUR4 Q8BVF2 Q8CJF9 Q8K199 Q8R4Z4 Q8VCD5 Q8VDZ4 Q8VIJ6 Q924A2 Q99K70 Q9D0E1 Q9D824 Q9DBS9 Q9ES00 Q9JKK1 Q9QZQ1 Q9R0L6 Q9Z0F8 Q9Z0U1	GO_CC
Cluster2	cell body	2	49	14	255	0.74	0.79	B1AZP2 P62821	GO_CC
Cluster2	cell junction	4	49	23	255	0.91	0.681	E9Q9R9 Q69Z38 Q9QZQ1 Q9Z0U1	GO_CC
Cluster2	cell periphery	13	49	64	255	1.06	0.463	A2ALK8 B1AZP2 E9Q9R9 F8VPU2 Q61851 Q6PB70 Q6PD21 Q8VDZ4 Q9DBS9 Q9JKK1 Q9QZQ1 Q9Z0F8 Q9Z0U1	GO_CC
Cluster2	cell projection	6	49	34	255	0.92	0.675	B1AZP2 E9Q9R9 F8VPU2 Q8VDZ4 Q9JKK1 Q9R0L6	GO_CC
Cluster2	cell surface	4	49	7	255	2.97	0.0271	Q61851 Q9D0E1 Q9Z0F8 Q9Z0U1	GO_CC
Cluster2	cell-cell junction	3	49	19	255	0.82	0.747	E9Q9R9 Q9QZQ1 Q9Z0U1	GO_CC
Cluster2	cell-substrate junction	1	49	4	255	1.3	0.577	Q69Z38	GO_CC
Cluster2	centriolar satellite	1	49	2	255	2.6	0.348	Q9R0L6	GO_CC
Cluster2	centriole	1	49	3	255	1.73	0.474	Q9R0L6	GO_CC
Cluster2	centrosome	2	49	11	255	0.95	0.66	O70133 Q9R0L6	GO_CC
Cluster2	chromatin	4	49	12	255	1.73	0.18	O09000 O70133 Q8R4Z4 Q8VIJ6	GO_CC
Cluster2	chromosome	6	49	25	255	1.25	0.341	O09000 O70133 P97868 Q8CJF9 Q8R4Z4 Q8VIJ6	GO_CC
Cluster2	ciliary basal body	2	49	4	255	2.6	0.168	E9Q9R9 Q9R0L6	GO_CC
Cluster2	ciliary transition zone	1	49	1	255	5.2	0.192	Q9R0L6	GO_CC
Cluster2	cilium	2	49	6	255	1.73	0.325	E9Q9R9 Q9R0L6	GO_CC
Cluster2	clathrin-coated vesicle	1	49	3	255	1.73	0.474	Q9JKK1	GO_CC
Cluster2	coated vesicle	1	49	3	255	1.73	0.474	Q9JKK1	GO_CC
Cluster2	condensed chromosome	1	49	5	255	1.04	0.659	Q8CJF9	GO_CC
Cluster2	condensed nuclear chromosome	1	49	4	255	1.3	0.577	Q8CJF9	GO_CC
Cluster2	CRD-mediated mRNA stability complex	1	49	2	255	2.6	0.348	O70133	GO_CC
Cluster2	cytoplasm	34	49	190	255	0.93	0.863	A2AAY5 A2AJI0 A2ALK8 E9Q9R9 F8VPU2 O08784 O09000 O70133 P60521 P62821 P97868 Q03172 Q05D44 Q3U5F4 Q3UH06 Q3UYV9 Q61851 Q6NVE8 Q6PB70 Q6PD21 Q6PGG6 Q8BUR4 Q8BVF2 Q8CJF9 Q8K199 Q8VDZ4 Q99K70 Q9DBS9 Q9ES00 Q9JKK1 Q9QZQ1 Q9R0L6 Q9Z0F8 Q9Z0U1	GO_CC
Cluster2	cytoplasmic ribonucleoprotein granule	3	49	5	255	3.12	0.0503	O70133 Q6PD21 Q8CJF9	GO_CC
Cluster2	cytoplasmic side of membrane	3	49	5	255	3.12	0.0503	A2ALK8 F8VPU2 Q61851	GO_CC
Cluster2	cytoplasmic side of plasma membrane	3	49	4	255	3.9	0.0233	A2ALK8 F8VPU2 Q61851	GO_CC
Cluster2	cytoplasmic vesicle	5	49	33	255	0.79	0.806	P62821 Q61851 Q6NVE8 Q99K70 Q9JKK1	GO_CC
Cluster2	cytoplasmic vesicle membrane	2	49	9	255	1.16	0.543	P62821 Q9JKK1	GO_CC
Cluster2	cytoskeleton	11	49	42	255	1.36	0.149	A2AAY5 A2AJI0 A2ALK8 E9Q9R9 F8VPU2 O70133 P97868 Q69Z38 Q6NVE8 Q9R0L6 Q9Z0F8	GO_CC
Cluster2	cytosol	23	49	131	255	0.91	0.802	A2AJI0 F8VPU2 O08784 O09000 O70133 P60521 P62821 P97868 Q05D44 Q3UYV9 Q6NVE8 Q6PD21 Q6PGG6 Q8BUR4 Q8BVF2 Q8CJF9 Q99K70 Q9DBS9 Q9JKK1 Q9QZQ1 Q9R0L6 Q9Z0F8 Q9Z0U1	GO_CC
Cluster2	dendrite	3	49	16	255	0.98	0.625	B1AZP2 F8VPU2 Q8VDZ4	GO_CC
Cluster2	dendritic tree	3	49	16	255	0.98	0.625	B1AZP2 F8VPU2 Q8VDZ4	GO_CC
Cluster2	distal axon	1	49	6	255	0.87	0.726	Q9JKK1	GO_CC
Cluster2	early endosome	2	49	7	255	1.49	0.402	P62821 Q9JKK1	GO_CC
Cluster2	EGO complex	1	49	1	255	5.2	0.192	Q99K70	GO_CC
Cluster2	endocytic vesicle	1	49	2	255	2.6	0.348	Q9JKK1	GO_CC
Cluster2	endomembrane system	10	49	62	255	0.84	0.813	O09000 P60521 P62821 Q61851 Q6NVE8 Q6PB70 Q99K70 Q9DBS9 Q9JKK1 Q9R0L6	GO_CC
Cluster2	endonuclease complex	2	49	4	255	2.6	0.168	O70133 Q8CJF9	GO_CC
Cluster2	endoplasmic reticulum	4	49	21	255	0.99	0.603	P62821 Q61851 Q6PB70 Q9DBS9	GO_CC
Cluster2	endoplasmic reticulum lumen	1	49	3	255	1.73	0.474	Q6PB70	GO_CC
Cluster2	endoplasmic reticulum membrane	1	49	10	255	0.52	0.887	P62821	GO_CC
Cluster2	endoplasmic reticulum subcompartment	1	49	10	255	0.52	0.887	P62821	GO_CC
Cluster2	endoribonuclease complex	2	49	4	255	2.6	0.168	O70133 Q8CJF9	GO_CC
Cluster2	endosome	4	49	16	255	1.3	0.369	P62821 Q6NVE8 Q99K70 Q9JKK1	GO_CC
Cluster2	endosome membrane	1	49	5	255	1.04	0.659	Q6NVE8	GO_CC
Cluster2	envelope	2	49	14	255	0.74	0.79	Q9DBS9 Q9R0L6	GO_CC
Cluster2	exocytic vesicle	1	49	2	255	2.6	0.348	Q9JKK1	GO_CC
Cluster2	exocytic vesicle membrane	1	49	1	255	5.2	0.192	Q9JKK1	GO_CC
Cluster2	extracellular region	2	49	12	255	0.87	0.709	Q61851 Q9Z0F8	GO_CC
Cluster2	extrinsic component of membrane	1	49	5	255	1.04	0.659	F8VPU2	GO_CC
Cluster2	extrinsic component of plasma membrane	1	49	1	255	5.2	0.192	F8VPU2	GO_CC
Cluster2	fibrillar center	2	49	9	255	1.16	0.543	O08784 Q3UH06	GO_CC
Cluster2	focal adhesion	1	49	4	255	1.3	0.577	Q69Z38	GO_CC
Cluster2	gap junction	1	49	1	255	5.2	0.192	Q9Z0U1	GO_CC
Cluster2	Golgi apparatus	6	49	24	255	1.3	0.302	O09000 P60521 P62821 Q61851 Q6NVE8 Q9JKK1	GO_CC
Cluster2	Golgi apparatus subcompartment	4	49	8	255	2.6	0.0466	P60521 P62821 Q6NVE8 Q9JKK1	GO_CC
Cluster2	Golgi membrane	3	49	4	255	3.9	0.0233	P60521 P62821 Q9JKK1	GO_CC
Cluster2	Gtr1-Gtr2 GTPase complex	1	49	1	255	5.2	0.192	Q99K70	GO_CC
Cluster2	guanyl-nucleotide exchange factor complex	1	49	1	255	5.2	0.192	Q8BUR4	GO_CC
Cluster2	integral component of membrane	3	49	16	255	0.98	0.625	Q61851 Q9JKK1 Q9Z0F8	GO_CC
Cluster2	integral component of organelle membrane	1	49	1	255	5.2	0.192	Q9JKK1	GO_CC
Cluster2	integral component of plasma membrane	2	49	9	255	1.16	0.543	Q61851 Q9Z0F8	GO_CC
Cluster2	integral component of synaptic vesicle membrane	1	49	1	255	5.2	0.192	Q9JKK1	GO_CC
Cluster2	intracellular	48	49	247	255	1.01	0.525	A2AAY5 A2AJI0 A2ALK8 E9Q9R9 F8VPU2 O08784 O09000 O70133 P11031 P60521 P62821 P97868 Q03172 Q05D44 Q3U5F4 Q3UH06 Q3UYV9 Q569Z6 Q61122 Q61851 Q69Z38 Q6NV83 Q6NVE8 Q6P9S1 Q6PB70 Q6PD21 Q6PGG6 Q7TNC4 Q8BTI8 Q8BUR4 Q8BVF2 Q8CJF9 Q8K199 Q8R4Z4 Q8VCD5 Q8VDZ4 Q8VIJ6 Q924A2 Q99K70 Q9D0E1 Q9D824 Q9DBS9 Q9ES00 Q9JKK1 Q9QZQ1 Q9R0L6 Q9Z0F8 Q9Z0U1	GO_CC
Cluster2	intracellular membrane-bounded organelle	38	49	191	255	1.04	0.392	O08784 O09000 O70133 P11031 P60521 P62821 P97868 Q03172 Q3UH06 Q3UYV9 Q569Z6 Q61122 Q61851 Q6NV83 Q6NVE8 Q6P9S1 Q6PB70 Q6PD21 Q6PGG6 Q7TNC4 Q8BTI8 Q8BUR4 Q8BVF2 Q8CJF9 Q8K199 Q8R4Z4 Q8VCD5 Q8VIJ6 Q924A2 Q99K70 Q9D0E1 Q9D824 Q9DBS9 Q9ES00 Q9JKK1 Q9QZQ1 Q9R0L6 Q9Z0U1	GO_CC
Cluster2	intracellular non-membrane-bounded organelle	20	49	87	255	1.2	0.175	A2AAY5 A2AJI0 A2ALK8 E9Q9R9 F8VPU2 O08784 O09000 O70133 P11031 P97868 Q3UH06 Q69Z38 Q6NVE8 Q6PD21 Q6PGG6 Q8CJF9 Q8R4Z4 Q8VIJ6 Q9R0L6 Q9Z0F8	GO_CC
Cluster2	intracellular organelle	45	49	220	255	1.06	0.151	A2AAY5 A2AJI0 A2ALK8 E9Q9R9 F8VPU2 O08784 O09000 O70133 P11031 P60521 P62821 P97868 Q03172 Q3UH06 Q3UYV9 Q569Z6 Q61122 Q61851 Q69Z38 Q6NV83 Q6NVE8 Q6P9S1 Q6PB70 Q6PD21 Q6PGG6 Q7TNC4 Q8BTI8 Q8BUR4 Q8BVF2 Q8CJF9 Q8K199 Q8R4Z4 Q8VCD5 Q8VIJ6 Q924A2 Q99K70 Q9D0E1 Q9D824 Q9DBS9 Q9ES00 Q9JKK1 Q9QZQ1 Q9R0L6 Q9Z0F8 Q9Z0U1	GO_CC
Cluster2	intracellular organelle lumen	27	49	134	255	1.05	0.406	O08784 O09000 O70133 P11031 P97868 Q03172 Q3UH06 Q3UYV9 Q569Z6 Q6NV83 Q6P9S1 Q6PB70 Q6PD21 Q6PGG6 Q7TNC4 Q8BTI8 Q8BUR4 Q8CJF9 Q8R4Z4 Q8VCD5 Q8VIJ6 Q924A2 Q9D0E1 Q9D824 Q9JKK1 Q9QZQ1 Q9Z0U1	GO_CC
Cluster2	intracellular vesicle	5	49	33	255	0.79	0.806	P62821 Q61851 Q6NVE8 Q99K70 Q9JKK1	GO_CC
Cluster2	intrinsic component of membrane	3	49	16	255	0.98	0.625	Q61851 Q9JKK1 Q9Z0F8	GO_CC
Cluster2	intrinsic component of organelle membrane	1	49	1	255	5.2	0.192	Q9JKK1	GO_CC
Cluster2	intrinsic component of plasma membrane	2	49	9	255	1.16	0.543	Q61851 Q9Z0F8	GO_CC
Cluster2	intrinsic component of synaptic vesicle membrane	1	49	1	255	5.2	0.192	Q9JKK1	GO_CC
Cluster2	lysosome	2	49	7	255	1.49	0.402	Q61851 Q99K70	GO_CC
Cluster2	lytic vacuole	2	49	7	255	1.49	0.402	Q61851 Q99K70	GO_CC
Cluster2	mediator complex	2	49	2	255	5.2	0.0363	Q569Z6 Q8VCD5	GO_CC
Cluster2	melanosome	1	49	1	255	5.2	0.192	P62821	GO_CC
Cluster2	membrane	19	49	96	255	1.03	0.49	A2ALK8 B1AZP2 E9Q9R9 F8VPU2 P60521 P62821 Q3U5F4 Q61851 Q6NVE8 Q6PB70 Q6PD21 Q8VDZ4 Q99K70 Q9DBS9 Q9JKK1 Q9QZQ1 Q9R0L6 Q9Z0F8 Q9Z0U1	GO_CC
Cluster2	membrane microdomain	1	49	5	255	1.04	0.659	Q9Z0F8	GO_CC
Cluster2	membrane protein complex	2	49	8	255	1.3	0.475	Q99K70 Q9JKK1	GO_CC
Cluster2	membrane raft	1	49	5	255	1.04	0.659	Q9Z0F8	GO_CC
Cluster2	membrane region	1	49	6	255	0.87	0.726	Q9Z0F8	GO_CC
Cluster2	membrane-bounded organelle	38	49	202	255	0.98	0.703	O08784 O09000 O70133 P11031 P60521 P62821 P97868 Q03172 Q3UH06 Q3UYV9 Q569Z6 Q61122 Q61851 Q6NV83 Q6NVE8 Q6P9S1 Q6PB70 Q6PD21 Q6PGG6 Q7TNC4 Q8BTI8 Q8BUR4 Q8BVF2 Q8CJF9 Q8K199 Q8R4Z4 Q8VCD5 Q8VIJ6 Q924A2 Q99K70 Q9D0E1 Q9D824 Q9DBS9 Q9ES00 Q9JKK1 Q9QZQ1 Q9R0L6 Q9Z0U1	GO_CC
Cluster2	membrane-enclosed lumen	27	49	134	255	1.05	0.406	O08784 O09000 O70133 P11031 P97868 Q03172 Q3UH06 Q3UYV9 Q569Z6 Q6NV83 Q6P9S1 Q6PB70 Q6PD21 Q6PGG6 Q7TNC4 Q8BTI8 Q8BUR4 Q8CJF9 Q8R4Z4 Q8VCD5 Q8VIJ6 Q924A2 Q9D0E1 Q9D824 Q9JKK1 Q9QZQ1 Q9Z0U1	GO_CC
Cluster2	microtubule	1	49	6	255	0.87	0.726	Q6NVE8	GO_CC
Cluster2	microtubule cytoskeleton	6	49	29	255	1.08	0.498	A2AJI0 E9Q9R9 O70133 P97868 Q6NVE8 Q9R0L6	GO_CC
Cluster2	microtubule organizing center	4	49	17	255	1.22	0.419	E9Q9R9 O70133 P97868 Q9R0L6	GO_CC
Cluster2	mitochondrion	3	49	18	255	0.87	0.71	Q03172 Q3UYV9 Q8K199	GO_CC
Cluster2	mRNA cap binding complex	1	49	2	255	2.6	0.348	Q3UYV9	GO_CC
Cluster2	mRNA cleavage factor complex	1	49	1	255	5.2	0.192	Q9D824	GO_CC
Cluster2	neuron projection	4	49	22	255	0.95	0.643	B1AZP2 F8VPU2 Q8VDZ4 Q9JKK1	GO_CC
Cluster2	neuron projection terminus	1	49	2	255	2.6	0.348	Q9JKK1	GO_CC
Cluster2	neuron to neuron synapse	1	49	6	255	0.87	0.726	E9Q9R9	GO_CC
Cluster2	neuronal cell body	2	49	14	255	0.74	0.79	B1AZP2 P62821	GO_CC
Cluster2	non-membrane-bounded organelle	20	49	87	255	1.2	0.175	A2AAY5 A2AJI0 A2ALK8 E9Q9R9 F8VPU2 O08784 O09000 O70133 P11031 P97868 Q3UH06 Q69Z38 Q6NVE8 Q6PD21 Q6PGG6 Q8CJF9 Q8R4Z4 Q8VIJ6 Q9R0L6 Q9Z0F8	GO_CC
Cluster2	nuclear body	12	49	38	255	1.64	0.0349	O70133 P97868 Q03172 Q3UH06 Q569Z6 Q6P9S1 Q7TNC4 Q8BTI8 Q8BUR4 Q8VIJ6 Q9D0E1 Q9QZQ1	GO_CC
Cluster2	nuclear cap binding complex	1	49	1	255	5.2	0.192	Q3UYV9	GO_CC
Cluster2	nuclear chromatin	3	49	5	255	3.12	0.0503	O09000 O70133 Q8R4Z4	GO_CC
Cluster2	nuclear chromosome	4	49	11	255	1.89	0.14	O09000 O70133 Q8CJF9 Q8R4Z4	GO_CC
Cluster2	nuclear envelope	2	49	10	255	1.04	0.605	Q9DBS9 Q9R0L6	GO_CC
Cluster2	nuclear lumen	26	49	127	255	1.07	0.364	O08784 O09000 O70133 P11031 P97868 Q03172 Q3UH06 Q3UYV9 Q569Z6 Q6NV83 Q6P9S1 Q6PD21 Q6PGG6 Q7TNC4 Q8BTI8 Q8BUR4 Q8CJF9 Q8R4Z4 Q8VCD5 Q8VIJ6 Q924A2 Q9D0E1 Q9D824 Q9JKK1 Q9QZQ1 Q9Z0U1	GO_CC
Cluster2	nuclear matrix	2	49	9	255	1.16	0.543	Q8VIJ6 Q9D0E1	GO_CC
Cluster2	nuclear membrane	2	49	8	255	1.3	0.475	Q9DBS9 Q9R0L6	GO_CC
Cluster2	nuclear periphery	2	49	10	255	1.04	0.605	Q8VIJ6 Q9D0E1	GO_CC
Cluster2	nuclear speck	7	49	21	255	1.73	0.0823	P97868 Q3UH06 Q569Z6 Q7TNC4 Q8BTI8 Q8BUR4 Q9QZQ1	GO_CC
Cluster2	nuclear stress granule	1	49	1	255	5.2	0.192	O70133	GO_CC
Cluster2	nucleolus	6	49	22	255	1.42	0.229	O08784 O70133 P11031 P97868 Q3UH06 Q6PGG6	GO_CC
Cluster2	nucleoplasm	23	49	115	255	1.04	0.448	O09000 O70133 P97868 Q03172 Q3UH06 Q3UYV9 Q569Z6 Q6NV83 Q6P9S1 Q6PD21 Q7TNC4 Q8BTI8 Q8BUR4 Q8CJF9 Q8R4Z4 Q8VCD5 Q8VIJ6 Q924A2 Q9D0E1 Q9D824 Q9JKK1 Q9QZQ1 Q9Z0U1	GO_CC
Cluster2	nucleus	33	49	165	255	1.04	0.4	O08784 O09000 O70133 P11031 P97868 Q03172 Q3UH06 Q3UYV9 Q569Z6 Q61122 Q61851 Q6NV83 Q6P9S1 Q6PD21 Q6PGG6 Q7TNC4 Q8BTI8 Q8BUR4 Q8BVF2 Q8CJF9 Q8R4Z4 Q8VCD5 Q8VIJ6 Q924A2 Q99K70 Q9D0E1 Q9D824 Q9DBS9 Q9ES00 Q9JKK1 Q9QZQ1 Q9R0L6 Q9Z0U1	GO_CC
Cluster2	organelle	45	49	222	255	1.05	0.194	A2AAY5 A2AJI0 A2ALK8 E9Q9R9 F8VPU2 O08784 O09000 O70133 P11031 P60521 P62821 P97868 Q03172 Q3UH06 Q3UYV9 Q569Z6 Q61122 Q61851 Q69Z38 Q6NV83 Q6NVE8 Q6P9S1 Q6PB70 Q6PD21 Q6PGG6 Q7TNC4 Q8BTI8 Q8BUR4 Q8BVF2 Q8CJF9 Q8K199 Q8R4Z4 Q8VCD5 Q8VIJ6 Q924A2 Q99K70 Q9D0E1 Q9D824 Q9DBS9 Q9ES00 Q9JKK1 Q9QZQ1 Q9R0L6 Q9Z0F8 Q9Z0U1	GO_CC
Cluster2	organelle envelope	2	49	14	255	0.74	0.79	Q9DBS9 Q9R0L6	GO_CC
Cluster2	organelle lumen	27	49	134	255	1.05	0.406	O08784 O09000 O70133 P11031 P97868 Q03172 Q3UH06 Q3UYV9 Q569Z6 Q6NV83 Q6P9S1 Q6PB70 Q6PD21 Q6PGG6 Q7TNC4 Q8BTI8 Q8BUR4 Q8CJF9 Q8R4Z4 Q8VCD5 Q8VIJ6 Q924A2 Q9D0E1 Q9D824 Q9JKK1 Q9QZQ1 Q9Z0U1	GO_CC
Cluster2	organelle membrane	7	49	32	255	1.14	0.419	P60521 P62821 Q6NVE8 Q99K70 Q9DBS9 Q9JKK1 Q9R0L6	GO_CC
Cluster2	organelle subcompartment	4	49	16	255	1.3	0.369	P60521 P62821 Q6NVE8 Q9JKK1	GO_CC
Cluster2	paraspeckles	2	49	2	255	5.2	0.0363	Q8VIJ6 Q9D0E1	GO_CC
Cluster2	pericentriolar material	1	49	1	255	5.2	0.192	Q9R0L6	GO_CC
Cluster2	perichromatin fibrils	1	49	1	255	5.2	0.192	O70133	GO_CC
Cluster2	perinuclear endoplasmic reticulum	1	49	1	255	5.2	0.192	Q9DBS9	GO_CC
Cluster2	perinuclear region of cytoplasm	5	49	17	255	1.53	0.209	O09000 Q61851 Q6NVE8 Q9DBS9 Q9JKK1	GO_CC
Cluster2	phagocytic vesicle	1	49	1	255	5.2	0.192	Q9JKK1	GO_CC
Cluster2	pigment granule	1	49	1	255	5.2	0.192	P62821	GO_CC
Cluster2	plasma membrane	13	49	63	255	1.07	0.435	A2ALK8 B1AZP2 E9Q9R9 F8VPU2 Q61851 Q6PB70 Q6PD21 Q8VDZ4 Q9DBS9 Q9JKK1 Q9QZQ1 Q9Z0F8 Q9Z0U1	GO_CC
Cluster2	plasma membrane bounded cell projection	6	49	34	255	0.92	0.675	B1AZP2 E9Q9R9 F8VPU2 Q8VDZ4 Q9JKK1 Q9R0L6	GO_CC
Cluster2	plasma membrane region	1	49	14	255	0.37	0.954	Q9Z0F8	GO_CC
Cluster2	podosome	1	49	3	255	1.73	0.474	A2AAY5	GO_CC
Cluster2	polymeric cytoskeletal fiber	1	49	8	255	0.65	0.823	Q6NVE8	GO_CC
Cluster2	polysomal ribosome	1	49	1	255	5.2	0.192	O70133	GO_CC
Cluster2	polysome	1	49	3	255	1.73	0.474	O70133	GO_CC
Cluster2	postsynapse	1	49	8	255	0.65	0.823	E9Q9R9	GO_CC
Cluster2	postsynaptic density	1	49	6	255	0.87	0.726	E9Q9R9	GO_CC
Cluster2	postsynaptic specialization	1	49	6	255	0.87	0.726	E9Q9R9	GO_CC
Cluster2	prespliceosome	1	49	2	255	2.6	0.348	Q7TNC4	GO_CC
Cluster2	presynapse	2	49	4	255	2.6	0.168	P62821 Q9JKK1	GO_CC
Cluster2	protein-containing complex	22	49	117	255	0.98	0.622	A2AAY5 O09000 O70133 P11031 P97868 Q3UYV9 Q569Z6 Q6PD21 Q7TNC4 Q8BTI8 Q8BUR4 Q8CJF9 Q8R4Z4 Q8VCD5 Q8VIJ6 Q924A2 Q99K70 Q9D0E1 Q9D824 Q9ES00 Q9JKK1 Q9R0L6	GO_CC
Cluster2	recycling endosome	1	49	5	255	1.04	0.659	Q9JKK1	GO_CC
Cluster2	ribonucleoprotein complex	7	49	29	255	1.26	0.31	O70133 Q3UYV9 Q6PD21 Q7TNC4 Q8BTI8 Q8CJF9 Q9D0E1	GO_CC
Cluster2	ribonucleoprotein granule	3	49	6	255	2.6	0.0871	O70133 Q6PD21 Q8CJF9	GO_CC
Cluster2	ribosome	1	49	5	255	1.04	0.659	O70133	GO_CC
Cluster2	RISC complex	1	49	1	255	5.2	0.192	Q8CJF9	GO_CC
Cluster2	RISC-loading complex	2	49	2	255	5.2	0.0363	O70133 Q8CJF9	GO_CC
Cluster2	RNA cap binding complex	1	49	2	255	2.6	0.348	Q3UYV9	GO_CC
Cluster2	RNA polymerase II transcription regulator complex	2	49	4	255	2.6	0.168	O09000 Q8VIJ6	GO_CC
Cluster2	RNA polymerase II transcription repressor complex	1	49	1	255	5.2	0.192	Q8R4Z4	GO_CC
Cluster2	RNAi effector complex	1	49	1	255	5.2	0.192	Q8CJF9	GO_CC
Cluster2	secretory vesicle	1	49	11	255	0.47	0.909	Q9JKK1	GO_CC
Cluster2	side of membrane	3	49	6	255	2.6	0.0871	A2ALK8 F8VPU2 Q61851	GO_CC
Cluster2	Sm-like protein family complex	1	49	4	255	1.3	0.577	Q7TNC4	GO_CC
Cluster2	small nuclear ribonucleoprotein complex	1	49	4	255	1.3	0.577	Q7TNC4	GO_CC
Cluster2	SNARE complex	1	49	1	255	5.2	0.192	Q9JKK1	GO_CC
Cluster2	somatodendritic compartment	4	49	19	255	1.1	0.514	B1AZP2 F8VPU2 P62821 Q8VDZ4	GO_CC
Cluster2	spliceosomal complex	3	49	13	255	1.2	0.471	Q7TNC4 Q8BTI8 Q9D0E1	GO_CC
Cluster2	spliceosomal snRNP complex	1	49	3	255	1.73	0.474	Q7TNC4	GO_CC
Cluster2	supramolecular complex	1	49	10	255	0.52	0.887	Q6NVE8	GO_CC
Cluster2	supramolecular fiber	1	49	10	255	0.52	0.887	Q6NVE8	GO_CC
Cluster2	supramolecular polymer	1	49	10	255	0.52	0.887	Q6NVE8	GO_CC
Cluster2	synapse	4	49	15	255	1.39	0.32	B1AZP2 E9Q9R9 P62821 Q9JKK1	GO_CC
Cluster2	synaptic vesicle	1	49	2	255	2.6	0.348	Q9JKK1	GO_CC
Cluster2	synaptic vesicle membrane	1	49	1	255	5.2	0.192	Q9JKK1	GO_CC
Cluster2	terminal bouton	1	49	2	255	2.6	0.348	Q9JKK1	GO_CC
Cluster2	tight junction	1	49	5	255	1.04	0.659	Q9Z0U1	GO_CC
Cluster2	trans-Golgi network	2	49	5	255	2.08	0.246	Q6NVE8 Q9JKK1	GO_CC
Cluster2	trans-Golgi network membrane	1	49	1	255	5.2	0.192	Q9JKK1	GO_CC
Cluster2	transcription regulator complex	4	49	7	255	2.97	0.0271	O09000 P11031 Q8VCD5 Q8VIJ6	GO_CC
Cluster2	transcription repressor complex	1	49	3	255	1.73	0.474	Q8R4Z4	GO_CC
Cluster2	transferase complex	2	49	23	255	0.45	0.959	Q8VCD5 Q9ES00	GO_CC
Cluster2	transport vesicle	3	49	4	255	3.9	0.0233	P62821 Q61851 Q9JKK1	GO_CC
Cluster2	transport vesicle membrane	2	49	2	255	5.2	0.0363	P62821 Q9JKK1	GO_CC
Cluster2	U1 snRNP	1	49	2	255	2.6	0.348	Q7TNC4	GO_CC
Cluster2	U2-type catalytic step 2 spliceosome	1	49	1	255	5.2	0.192	Q8BTI8	GO_CC
Cluster2	U2-type prespliceosome	1	49	2	255	2.6	0.348	Q7TNC4	GO_CC
Cluster2	U2-type spliceosomal complex	2	49	3	255	3.47	0.0954	Q7TNC4 Q8BTI8	GO_CC
Cluster2	ubiquitin ligase complex	2	49	4	255	2.6	0.168	Q8VCD5 Q9ES00	GO_CC
Cluster2	vacuolar membrane	2	49	5	255	2.08	0.246	P60521 Q99K70	GO_CC
Cluster2	vacuole	3	49	8	255	1.95	0.183	P60521 Q61851 Q99K70	GO_CC
Cluster2	vesicle	5	49	35	255	0.74	0.849	P62821 Q61851 Q6NVE8 Q99K70 Q9JKK1	GO_CC
Cluster2	vesicle membrane	2	49	10	255	1.04	0.605	P62821 Q9JKK1	GO_CC
Cluster2	whole membrane	6	49	22	255	1.42	0.229	P60521 P62821 Q6NVE8 Q99K70 Q9JKK1 Q9Z0F8	GO_CC
Cluster3	acetyltransferase complex	2	36	5	255	2.83	0.147	G5E8P1 Q9D2U5	GO_CC
Cluster3	actin cytoskeleton	2	36	10	255	1.42	0.425	Q60875 Q91YM2	GO_CC
Cluster3	annulate lamellae	1	36	1	255	7.08	0.141	Q9ERU9	GO_CC
Cluster3	apical part of cell	1	36	8	255	0.89	0.709	Q9R0L6	GO_CC
Cluster3	asymmetric synapse	1	36	6	255	1.18	0.603	Q60875	GO_CC
Cluster3	axon	1	36	10	255	0.71	0.788	B2RQC6	GO_CC
Cluster3	axon terminus	1	36	2	255	3.54	0.263	B2RQC6	GO_CC
Cluster3	Cajal body	1	36	3	255	2.36	0.368	Q8BTI8	GO_CC
Cluster3	catalytic complex	7	36	42	255	1.18	0.377	G5E8P1 Q52KI8 Q6PDM2 Q8BTI8 Q9CR00 Q9CS00 Q9D2U5	GO_CC
Cluster3	catalytic step 2 spliceosome	4	36	8	255	3.54	0.0156	Q52KI8 Q6PDM2 Q8BTI8 Q9CS00	GO_CC
Cluster3	cell	36	36	253	255	1.01	0.737	B2RQC6 B7ZNG4 G5E8P1 P40201 P45591 P47713 P62960 P97868 P98203 Q00PI9 Q06180 Q3UHX2 Q4FK66 Q52KI8 Q60875 Q61033 Q64364 Q6PDM2 Q6Y7W8 Q7TSY8 Q80U28 Q80W88 Q8BJU0 Q8BTI8 Q8BYJ6 Q91YM2 Q923D5 Q99KD5 Q9CR00 Q9CS00 Q9D2U5 Q9ERU9 Q9JK23 Q9R0L6 Q9R210 Q9Z1B8	GO_CC
Cluster3	cell body	4	36	14	255	2.02	0.118	B2RQC6 P62960 Q60875 Q6Y7W8	GO_CC
Cluster3	cell leading edge	1	36	9	255	0.79	0.752	Q60875	GO_CC
Cluster3	cell periphery	4	36	64	255	0.44	0.993	P98203 Q3UHX2 Q60875 Q80U28	GO_CC
Cluster3	cell projection	6	36	34	255	1.25	0.341	B2RQC6 P62960 Q60875 Q6Y7W8 Q91YM2 Q9R0L6	GO_CC
Cluster3	cell projection membrane	1	36	4	255	1.77	0.458	Q60875	GO_CC
Cluster3	centriolar satellite	1	36	2	255	3.54	0.263	Q9R0L6	GO_CC
Cluster3	centriole	1	36	3	255	2.36	0.368	Q9R0L6	GO_CC
Cluster3	centrosome	2	36	11	255	1.29	0.477	Q9ERU9 Q9R0L6	GO_CC
Cluster3	chromatin	2	36	12	255	1.18	0.526	Q61033 Q64364	GO_CC
Cluster3	chromosomal region	1	36	6	255	1.18	0.603	Q7TSY8	GO_CC
Cluster3	chromosome	5	36	25	255	1.42	0.266	P97868 Q61033 Q64364 Q7TSY8 Q9Z1B8	GO_CC
Cluster3	chromosome, centromeric region	1	36	6	255	1.18	0.603	Q7TSY8	GO_CC
Cluster3	ciliary basal body	2	36	4	255	3.54	0.0968	Q91YM2 Q9R0L6	GO_CC
Cluster3	ciliary transition zone	1	36	1	255	7.08	0.141	Q9R0L6	GO_CC
Cluster3	cilium	2	36	6	255	2.36	0.202	Q91YM2 Q9R0L6	GO_CC
Cluster3	cohesin complex	1	36	1	255	7.08	0.141	Q7TSY8	GO_CC
Cluster3	condensed chromosome	1	36	5	255	1.42	0.536	Q7TSY8	GO_CC
Cluster3	condensed chromosome, centromeric region	1	36	2	255	3.54	0.263	Q7TSY8	GO_CC
Cluster3	condensed nuclear chromosome	1	36	4	255	1.77	0.458	Q7TSY8	GO_CC
Cluster3	condensed nuclear chromosome, centromeric region	1	36	1	255	7.08	0.141	Q7TSY8	GO_CC
Cluster3	contractile fiber	1	36	2	255	3.54	0.263	P45591	GO_CC
Cluster3	CRD-mediated mRNA stability complex	1	36	2	255	3.54	0.263	P62960	GO_CC
Cluster3	cytoplasm	30	36	190	255	1.12	0.133	B2RQC6 B7ZNG4 P40201 P45591 P47713 P62960 P97868 P98203 Q06180 Q3UHX2 Q52KI8 Q60875 Q64364 Q6PDM2 Q6Y7W8 Q7TSY8 Q80U28 Q80W88 Q8BJU0 Q8BYJ6 Q91YM2 Q923D5 Q99KD5 Q9CR00 Q9CS00 Q9D2U5 Q9ERU9 Q9JK23 Q9R0L6 Q9R210	GO_CC
Cluster3	cytoplasmic ribonucleoprotein granule	2	36	5	255	2.83	0.147	P62960 Q6Y7W8	GO_CC
Cluster3	cytoplasmic stress granule	2	36	2	255	7.08	0.0195	P62960 Q6Y7W8	GO_CC
Cluster3	cytoplasmic vesicle	5	36	33	255	1.07	0.514	P47713 Q3UHX2 Q6Y7W8 Q80U28 Q8BYJ6	GO_CC
Cluster3	cytoplasmic vesicle membrane	1	36	9	255	0.79	0.752	Q8BYJ6	GO_CC
Cluster3	cytoskeleton	7	36	42	255	1.18	0.377	P45591 P97868 Q60875 Q91YM2 Q9ERU9 Q9R0L6 Q9Z1B8	GO_CC
Cluster3	cytosol	22	36	131	255	1.19	0.14	B2RQC6 P47713 P62960 P97868 Q06180 Q3UHX2 Q52KI8 Q60875 Q6Y7W8 Q7TSY8 Q80U28 Q80W88 Q8BJU0 Q8BYJ6 Q91YM2 Q923D5 Q99KD5 Q9CR00 Q9CS00 Q9ERU9 Q9JK23 Q9R0L6	GO_CC
Cluster3	dendrite	3	36	16	255	1.33	0.399	P62960 Q60875 Q6Y7W8	GO_CC
Cluster3	dendritic shaft	1	36	2	255	3.54	0.263	Q60875	GO_CC
Cluster3	dendritic tree	3	36	16	255	1.33	0.399	P62960 Q60875 Q6Y7W8	GO_CC
Cluster3	distal axon	1	36	6	255	1.18	0.603	B2RQC6	GO_CC
Cluster3	endomembrane system	13	36	62	255	1.49	0.0616	P47713 P62960 Q06180 Q3UHX2 Q4FK66 Q61033 Q6Y7W8 Q80U28 Q8BYJ6 Q99KD5 Q9ERU9 Q9JK23 Q9R0L6	GO_CC
Cluster3	endopeptidase complex	1	36	1	255	7.08	0.141	Q9CR00	GO_CC
Cluster3	endoplasmic reticulum	4	36	21	255	1.35	0.342	P47713 Q06180 Q6Y7W8 Q9JK23	GO_CC
Cluster3	endoplasmic reticulum membrane	1	36	10	255	0.71	0.788	P47713	GO_CC
Cluster3	endoplasmic reticulum subcompartment	1	36	10	255	0.71	0.788	P47713	GO_CC
Cluster3	endosome	1	36	16	255	0.44	0.919	Q6Y7W8	GO_CC
Cluster3	envelope	6	36	14	255	3.04	0.00678	P47713 P62960 Q4FK66 Q61033 Q9ERU9 Q9R0L6	GO_CC
Cluster3	exocytic vesicle	1	36	2	255	3.54	0.263	Q80U28	GO_CC
Cluster3	extracellular region	2	36	12	255	1.18	0.526	P62960 Q3UHX2	GO_CC
Cluster3	extracellular space	1	36	3	255	2.36	0.368	Q3UHX2	GO_CC
Cluster3	fibrillar center	1	36	9	255	0.79	0.752	P40201	GO_CC
Cluster3	ficolin-1-rich granule	1	36	3	255	2.36	0.368	Q3UHX2	GO_CC
Cluster3	ficolin-1-rich granule lumen	1	36	2	255	3.54	0.263	Q3UHX2	GO_CC
Cluster3	Golgi apparatus	4	36	24	255	1.18	0.448	P47713 Q6Y7W8 Q99KD5 Q9JK23	GO_CC
Cluster3	granular component	1	36	1	255	7.08	0.141	Q64364	GO_CC
Cluster3	H3 histone acetyltransferase complex	1	36	3	255	2.36	0.368	G5E8P1	GO_CC
Cluster3	heterochromatin	1	36	2	255	3.54	0.263	Q64364	GO_CC
Cluster3	histone acetyltransferase complex	1	36	4	255	1.77	0.458	G5E8P1	GO_CC
Cluster3	histone pre-mRNA 3'end processing complex	1	36	1	255	7.08	0.141	P62960	GO_CC
Cluster3	I band	1	36	2	255	3.54	0.263	P45591	GO_CC
Cluster3	inclusion body	1	36	1	255	7.08	0.141	Q9ERU9	GO_CC
Cluster3	integral component of membrane	2	36	16	255	0.89	0.691	Q6Y7W8 Q80U28	GO_CC
Cluster3	intracellular	36	36	247	255	1.03	0.291	B2RQC6 B7ZNG4 G5E8P1 P40201 P45591 P47713 P62960 P97868 P98203 Q00PI9 Q06180 Q3UHX2 Q4FK66 Q52KI8 Q60875 Q61033 Q64364 Q6PDM2 Q6Y7W8 Q7TSY8 Q80U28 Q80W88 Q8BJU0 Q8BTI8 Q8BYJ6 Q91YM2 Q923D5 Q99KD5 Q9CR00 Q9CS00 Q9D2U5 Q9ERU9 Q9JK23 Q9R0L6 Q9R210 Q9Z1B8	GO_CC
Cluster3	intracellular membrane-bounded organelle	32	36	191	255	1.19	0.0244	B2RQC6 G5E8P1 P40201 P45591 P47713 P62960 P97868 P98203 Q00PI9 Q06180 Q4FK66 Q52KI8 Q61033 Q64364 Q6PDM2 Q6Y7W8 Q7TSY8 Q80U28 Q80W88 Q8BJU0 Q8BTI8 Q91YM2 Q923D5 Q99KD5 Q9CR00 Q9CS00 Q9D2U5 Q9ERU9 Q9JK23 Q9R0L6 Q9R210 Q9Z1B8	GO_CC
Cluster3	intracellular non-membrane-bounded organelle	15	36	87	255	1.22	0.199	P40201 P45591 P47713 P62960 P97868 Q60875 Q61033 Q64364 Q6Y7W8 Q7TSY8 Q80W88 Q91YM2 Q9ERU9 Q9R0L6 Q9Z1B8	GO_CC
Cluster3	intracellular organelle	35	36	220	255	1.13	0.0248	B2RQC6 G5E8P1 P40201 P45591 P47713 P62960 P97868 P98203 Q00PI9 Q06180 Q3UHX2 Q4FK66 Q52KI8 Q60875 Q61033 Q64364 Q6PDM2 Q6Y7W8 Q7TSY8 Q80U28 Q80W88 Q8BJU0 Q8BTI8 Q8BYJ6 Q91YM2 Q923D5 Q99KD5 Q9CR00 Q9CS00 Q9D2U5 Q9ERU9 Q9JK23 Q9R0L6 Q9R210 Q9Z1B8	GO_CC
Cluster3	intracellular organelle lumen	22	36	134	255	1.16	0.176	B2RQC6 G5E8P1 P40201 P45591 P62960 P97868 Q00PI9 Q06180 Q3UHX2 Q52KI8 Q64364 Q6PDM2 Q7TSY8 Q80W88 Q8BTI8 Q923D5 Q99KD5 Q9CR00 Q9CS00 Q9JK23 Q9R210 Q9Z1B8	GO_CC
Cluster3	intracellular vesicle	5	36	33	255	1.07	0.514	P47713 Q3UHX2 Q6Y7W8 Q80U28 Q8BYJ6	GO_CC
Cluster3	intrinsic component of membrane	2	36	16	255	0.89	0.691	Q6Y7W8 Q80U28	GO_CC
Cluster3	kinetochore	1	36	5	255	1.42	0.536	Q7TSY8	GO_CC
Cluster3	leading edge membrane	1	36	2	255	3.54	0.263	Q60875	GO_CC
Cluster3	lipid droplet	1	36	1	255	7.08	0.141	P47713	GO_CC
Cluster3	membrane	13	36	96	255	0.96	0.648	P47713 P62960 P98203 Q3UHX2 Q4FK66 Q60875 Q61033 Q6Y7W8 Q80U28 Q8BJU0 Q8BYJ6 Q9ERU9 Q9R0L6	GO_CC
Cluster3	membrane region	1	36	6	255	1.18	0.603	Q9ERU9	GO_CC
Cluster3	membrane-bounded organelle	35	36	202	255	1.23	0.00137	B2RQC6 G5E8P1 P40201 P45591 P47713 P62960 P97868 P98203 Q00PI9 Q06180 Q3UHX2 Q4FK66 Q52KI8 Q60875 Q61033 Q64364 Q6PDM2 Q6Y7W8 Q7TSY8 Q80U28 Q80W88 Q8BJU0 Q8BTI8 Q8BYJ6 Q91YM2 Q923D5 Q99KD5 Q9CR00 Q9CS00 Q9D2U5 Q9ERU9 Q9JK23 Q9R0L6 Q9R210 Q9Z1B8	GO_CC
Cluster3	membrane-enclosed lumen	22	36	134	255	1.16	0.176	B2RQC6 G5E8P1 P40201 P45591 P62960 P97868 Q00PI9 Q06180 Q3UHX2 Q52KI8 Q64364 Q6PDM2 Q7TSY8 Q80W88 Q8BTI8 Q923D5 Q99KD5 Q9CR00 Q9CS00 Q9JK23 Q9R210 Q9Z1B8	GO_CC
Cluster3	messenger ribonucleoprotein complex	1	36	1	255	7.08	0.141	P62960	GO_CC
Cluster3	microtubule	1	36	6	255	1.18	0.603	Q60875	GO_CC
Cluster3	microtubule cytoskeleton	6	36	29	255	1.47	0.207	P97868 Q60875 Q91YM2 Q9ERU9 Q9R0L6 Q9Z1B8	GO_CC
Cluster3	microtubule organizing center	5	36	17	255	2.08	0.0731	P97868 Q91YM2 Q9ERU9 Q9R0L6 Q9Z1B8	GO_CC
Cluster3	mitochondrial envelope	1	36	4	255	1.77	0.458	P47713	GO_CC
Cluster3	mitochondrial inner membrane	1	36	2	255	3.54	0.263	P47713	GO_CC
Cluster3	mitochondrial membrane	1	36	4	255	1.77	0.458	P47713	GO_CC
Cluster3	mitochondrion	4	36	18	255	1.57	0.238	B2RQC6 P47713 Q64364 Q9ERU9	GO_CC
Cluster3	mitotic cohesin complex	1	36	1	255	7.08	0.141	Q7TSY8	GO_CC
Cluster3	MOZ/MORF histone acetyltransferase complex	1	36	3	255	2.36	0.368	G5E8P1	GO_CC
Cluster3	myofibril	1	36	2	255	3.54	0.263	P45591	GO_CC
Cluster3	N-terminal protein acetyltransferase complex	1	36	1	255	7.08	0.141	Q9D2U5	GO_CC
Cluster3	NatC complex	1	36	1	255	7.08	0.141	Q9D2U5	GO_CC
Cluster3	neuron projection	4	36	22	255	1.29	0.377	B2RQC6 P62960 Q60875 Q6Y7W8	GO_CC
Cluster3	neuron projection terminus	1	36	2	255	3.54	0.263	B2RQC6	GO_CC
Cluster3	neuron to neuron synapse	1	36	6	255	1.18	0.603	Q60875	GO_CC
Cluster3	neuronal cell body	4	36	14	255	2.02	0.118	B2RQC6 P62960 Q60875 Q6Y7W8	GO_CC
Cluster3	non-membrane-bounded organelle	15	36	87	255	1.22	0.199	P40201 P45591 P47713 P62960 P97868 Q60875 Q61033 Q64364 Q6Y7W8 Q7TSY8 Q80W88 Q91YM2 Q9ERU9 Q9R0L6 Q9Z1B8	GO_CC
Cluster3	nuclear body	9	36	38	255	1.68	0.0622	G5E8P1 P97868 Q52KI8 Q6PDM2 Q7TSY8 Q8BTI8 Q923D5 Q99KD5 Q9CS00	GO_CC
Cluster3	nuclear chromosome	1	36	11	255	0.64	0.819	Q7TSY8	GO_CC
Cluster3	nuclear envelope	5	36	10	255	3.54	0.00638	P62960 Q4FK66 Q61033 Q9ERU9 Q9R0L6	GO_CC
Cluster3	nuclear inclusion body	1	36	1	255	7.08	0.141	Q9ERU9	GO_CC
Cluster3	nuclear inner membrane	1	36	1	255	7.08	0.141	Q61033	GO_CC
Cluster3	nuclear lumen	21	36	127	255	1.17	0.178	B2RQC6 G5E8P1 P40201 P45591 P62960 P97868 Q00PI9 Q06180 Q52KI8 Q64364 Q6PDM2 Q7TSY8 Q80W88 Q8BTI8 Q923D5 Q99KD5 Q9CR00 Q9CS00 Q9JK23 Q9R210 Q9Z1B8	GO_CC
Cluster3	nuclear matrix	3	36	9	255	2.36	0.119	B2RQC6 P45591 Q52KI8	GO_CC
Cluster3	nuclear membrane	5	36	8	255	4.43	0.00176	P62960 Q4FK66 Q61033 Q9ERU9 Q9R0L6	GO_CC
Cluster3	nuclear periphery	3	36	10	255	2.12	0.154	B2RQC6 P45591 Q52KI8	GO_CC
Cluster3	nuclear pore	1	36	1	255	7.08	0.141	Q9ERU9	GO_CC
Cluster3	nuclear pore cytoplasmic filaments	1	36	1	255	7.08	0.141	Q9ERU9	GO_CC
Cluster3	nuclear pore nuclear basket	1	36	1	255	7.08	0.141	Q9ERU9	GO_CC
Cluster3	nuclear speck	8	36	21	255	2.7	0.00383	G5E8P1 P97868 Q52KI8 Q6PDM2 Q8BTI8 Q923D5 Q99KD5 Q9CS00	GO_CC
Cluster3	nucleolus	4	36	22	255	1.29	0.377	P40201 P97868 Q64364 Q80W88	GO_CC
Cluster3	nucleoplasm	19	36	115	255	1.17	0.206	B2RQC6 G5E8P1 P40201 P62960 P97868 Q00PI9 Q06180 Q52KI8 Q64364 Q6PDM2 Q7TSY8 Q8BTI8 Q923D5 Q99KD5 Q9CR00 Q9CS00 Q9JK23 Q9R210 Q9Z1B8	GO_CC
Cluster3	nucleus	31	36	165	255	1.33	0.00217	B2RQC6 G5E8P1 P40201 P45591 P47713 P62960 P97868 P98203 Q00PI9 Q06180 Q4FK66 Q52KI8 Q61033 Q64364 Q6PDM2 Q7TSY8 Q80U28 Q80W88 Q8BJU0 Q8BTI8 Q91YM2 Q923D5 Q99KD5 Q9CR00 Q9CS00 Q9D2U5 Q9ERU9 Q9JK23 Q9R0L6 Q9R210 Q9Z1B8	GO_CC
Cluster3	organelle	35	36	222	255	1.12	0.0333	B2RQC6 G5E8P1 P40201 P45591 P47713 P62960 P97868 P98203 Q00PI9 Q06180 Q3UHX2 Q4FK66 Q52KI8 Q60875 Q61033 Q64364 Q6PDM2 Q6Y7W8 Q7TSY8 Q80U28 Q80W88 Q8BJU0 Q8BTI8 Q8BYJ6 Q91YM2 Q923D5 Q99KD5 Q9CR00 Q9CS00 Q9D2U5 Q9ERU9 Q9JK23 Q9R0L6 Q9R210 Q9Z1B8	GO_CC
Cluster3	organelle envelope	6	36	14	255	3.04	0.00678	P47713 P62960 Q4FK66 Q61033 Q9ERU9 Q9R0L6	GO_CC
Cluster3	organelle inner membrane	2	36	3	255	4.72	0.0531	P47713 Q61033	GO_CC
Cluster3	organelle lumen	22	36	134	255	1.16	0.176	B2RQC6 G5E8P1 P40201 P45591 P62960 P97868 Q00PI9 Q06180 Q3UHX2 Q52KI8 Q64364 Q6PDM2 Q7TSY8 Q80W88 Q8BTI8 Q923D5 Q99KD5 Q9CR00 Q9CS00 Q9JK23 Q9R210 Q9Z1B8	GO_CC
Cluster3	organelle membrane	7	36	32	255	1.55	0.142	P47713 P62960 Q4FK66 Q61033 Q8BYJ6 Q9ERU9 Q9R0L6	GO_CC
Cluster3	organelle subcompartment	1	36	16	255	0.44	0.919	P47713	GO_CC
Cluster3	peptidase complex	1	36	1	255	7.08	0.141	Q9CR00	GO_CC
Cluster3	pericentriolar material	1	36	1	255	7.08	0.141	Q9R0L6	GO_CC
Cluster3	perikaryon	1	36	3	255	2.36	0.368	Q6Y7W8	GO_CC
Cluster3	perinuclear region of cytoplasm	2	36	17	255	0.83	0.725	P47713 P62960	GO_CC
Cluster3	plasma membrane	4	36	63	255	0.45	0.992	P98203 Q3UHX2 Q60875 Q80U28	GO_CC
Cluster3	plasma membrane bounded cell projection	6	36	34	255	1.25	0.341	B2RQC6 P62960 Q60875 Q6Y7W8 Q91YM2 Q9R0L6	GO_CC
Cluster3	plasma membrane region	1	36	14	255	0.51	0.888	Q60875	GO_CC
Cluster3	podosome	1	36	3	255	2.36	0.368	Q60875	GO_CC
Cluster3	polymeric cytoskeletal fiber	1	36	8	255	0.89	0.709	Q60875	GO_CC
Cluster3	postsynapse	1	36	8	255	0.89	0.709	Q60875	GO_CC
Cluster3	postsynaptic density	1	36	6	255	1.18	0.603	Q60875	GO_CC
Cluster3	postsynaptic specialization	1	36	6	255	1.18	0.603	Q60875	GO_CC
Cluster3	precatalytic spliceosome	1	36	2	255	3.54	0.263	Q4FK66	GO_CC
Cluster3	preribosome	1	36	2	255	3.54	0.263	P40201	GO_CC
Cluster3	preribosome, small subunit precursor	1	36	1	255	7.08	0.141	P40201	GO_CC
Cluster3	presynapse	2	36	4	255	3.54	0.0968	B2RQC6 Q80U28	GO_CC
Cluster3	proteasome accessory complex	1	36	1	255	7.08	0.141	Q9CR00	GO_CC
Cluster3	proteasome complex	1	36	1	255	7.08	0.141	Q9CR00	GO_CC
Cluster3	proteasome regulatory particle	1	36	1	255	7.08	0.141	Q9CR00	GO_CC
Cluster3	proteasome regulatory particle, base subcomplex	1	36	1	255	7.08	0.141	Q9CR00	GO_CC
Cluster3	protein acetyltransferase complex	2	36	5	255	2.83	0.147	G5E8P1 Q9D2U5	GO_CC
Cluster3	protein-containing complex	20	36	117	255	1.21	0.141	B2RQC6 G5E8P1 P40201 P62960 P97868 Q4FK66 Q52KI8 Q60875 Q64364 Q6PDM2 Q6Y7W8 Q7TSY8 Q8BTI8 Q923D5 Q9CR00 Q9CS00 Q9D2U5 Q9ERU9 Q9R0L6 Q9R210	GO_CC
Cluster3	proximal dendrite	1	36	1	255	7.08	0.141	Q6Y7W8	GO_CC
Cluster3	ribonucleoprotein complex	9	36	29	255	2.2	0.0103	P40201 P62960 Q4FK66 Q52KI8 Q6PDM2 Q6Y7W8 Q8BTI8 Q923D5 Q9CS00	GO_CC
Cluster3	ribonucleoprotein granule	2	36	6	255	2.36	0.202	P62960 Q6Y7W8	GO_CC
Cluster3	ruffle	1	36	4	255	1.77	0.458	Q60875	GO_CC
Cluster3	ruffle membrane	1	36	2	255	3.54	0.263	Q60875	GO_CC
Cluster3	sarcomere	1	36	2	255	3.54	0.263	P45591	GO_CC
Cluster3	secretory granule	2	36	9	255	1.57	0.371	P47713 Q3UHX2	GO_CC
Cluster3	secretory vesicle	3	36	11	255	1.93	0.191	P47713 Q3UHX2 Q80U28	GO_CC
Cluster3	senescence-associated heterochromatin focus	1	36	1	255	7.08	0.141	Q64364	GO_CC
Cluster3	site of DNA damage	1	36	2	255	3.54	0.263	Q9Z1B8	GO_CC
Cluster3	site of double-strand break	1	36	2	255	3.54	0.263	Q9Z1B8	GO_CC
Cluster3	somatodendritic compartment	4	36	19	255	1.49	0.272	B2RQC6 P62960 Q60875 Q6Y7W8	GO_CC
Cluster3	spliceosomal complex	7	36	13	255	3.81	0.000584	P62960 Q4FK66 Q52KI8 Q6PDM2 Q8BTI8 Q923D5 Q9CS00	GO_CC
Cluster3	supramolecular complex	2	36	10	255	1.42	0.425	P45591 Q60875	GO_CC
Cluster3	supramolecular fiber	2	36	10	255	1.42	0.425	P45591 Q60875	GO_CC
Cluster3	supramolecular polymer	2	36	10	255	1.42	0.425	P45591 Q60875	GO_CC
Cluster3	synapse	3	36	15	255	1.42	0.357	B2RQC6 Q60875 Q80U28	GO_CC
Cluster3	synaptic vesicle	1	36	2	255	3.54	0.263	Q80U28	GO_CC
Cluster3	terminal bouton	1	36	2	255	3.54	0.263	B2RQC6	GO_CC
Cluster3	transcription regulator complex	1	36	7	255	1.01	0.66	Q9R210	GO_CC
Cluster3	transferase complex	2	36	23	255	0.62	0.868	G5E8P1 Q9D2U5	GO_CC
Cluster3	transport vesicle	1	36	4	255	1.77	0.458	Q80U28	GO_CC
Cluster3	U12-type spliceosomal complex	1	36	1	255	7.08	0.141	P62960	GO_CC
Cluster3	U2-type catalytic step 2 spliceosome	1	36	1	255	7.08	0.141	Q8BTI8	GO_CC
Cluster3	U2-type spliceosomal complex	1	36	3	255	2.36	0.368	Q8BTI8	GO_CC
Cluster3	vesicle	6	36	35	255	1.21	0.369	P47713 Q3UHX2 Q60875 Q6Y7W8 Q80U28 Q8BYJ6	GO_CC
Cluster3	vesicle membrane	1	36	10	255	0.71	0.788	Q8BYJ6	GO_CC
Cluster3	whole membrane	1	36	22	255	0.32	0.97	Q9ERU9	GO_CC
Cluster3	Z disc	1	36	2	255	3.54	0.263	P45591	GO_CC
Cluster3	zymogen granule	1	36	1	255	7.08	0.141	P47713	GO_CC
Cluster4	9+0 non-motile cilium	1	37	1	255	6.89	0.145	Q9QYR6	GO_CC
Cluster4	actin cytoskeleton	1	37	10	255	0.69	0.798	Q62417	GO_CC
Cluster4	actin filament bundle	1	37	1	255	6.89	0.145	Q62417	GO_CC
Cluster4	actomyosin	1	37	1	255	6.89	0.145	Q62417	GO_CC
Cluster4	adherens junction	3	37	12	255	1.72	0.245	P39447 Q62417 Q62433	GO_CC
Cluster4	anchoring junction	3	37	13	255	1.59	0.287	P39447 Q62417 Q62433	GO_CC
Cluster4	apical junction complex	2	37	8	255	1.72	0.327	P39447 Q62417	GO_CC
Cluster4	apical part of cell	1	37	8	255	0.86	0.72	P39447	GO_CC
Cluster4	apical plasma membrane	1	37	6	255	1.15	0.614	P39447	GO_CC
Cluster4	apicolateral plasma membrane	1	37	1	255	6.89	0.145	P39447	GO_CC
Cluster4	asymmetric synapse	1	37	6	255	1.15	0.614	Q9QYR6	GO_CC
Cluster4	axon	2	37	10	255	1.38	0.44	O08553 Q9QYR6	GO_CC
Cluster4	axon initial segment	1	37	1	255	6.89	0.145	Q9QYR6	GO_CC
Cluster4	basolateral plasma membrane	1	37	4	255	1.72	0.468	P39447	GO_CC
Cluster4	bicellular tight junction	1	37	5	255	1.38	0.546	P39447	GO_CC
Cluster4	blood microparticle	1	37	1	255	6.89	0.145	P29699	GO_CC
Cluster4	BORC complex	1	37	1	255	6.89	0.145	Q80XH1	GO_CC
Cluster4	bounding membrane of organelle	2	37	18	255	0.77	0.769	Q62433 Q99J21	GO_CC
Cluster4	box C/D snoRNP complex	1	37	2	255	3.45	0.27	E9Q5C9	GO_CC
Cluster4	box H/ACA RNP complex	2	37	2	255	6.89	0.0206	E9Q5C9 Q9CQS2	GO_CC
Cluster4	box H/ACA scaRNP complex	1	37	1	255	6.89	0.145	Q9CQS2	GO_CC
Cluster4	box H/ACA snoRNP complex	2	37	2	255	6.89	0.0206	E9Q5C9 Q9CQS2	GO_CC
Cluster4	box H/ACA telomerase RNP complex	1	37	1	255	6.89	0.145	Q9CQS2	GO_CC
Cluster4	Cajal body	3	37	3	255	6.89	0.00284	E9Q5C9 Q8BTI8 Q9CQS2	GO_CC
Cluster4	catalytic complex	10	37	42	255	1.64	0.0564	E9Q5C9 E9Q784 Q52KI8 Q61656 Q62417 Q6PHZ5 Q80UW2 Q8BTI8 Q8BZ47 Q9CQS2	GO_CC
Cluster4	catalytic step 2 spliceosome	3	37	8	255	2.58	0.094	Q52KI8 Q61656 Q8BTI8	GO_CC
Cluster4	cell	36	37	253	255	0.98	0.979	E9Q137 E9Q5C9 E9Q784 O08553 P29699 P39447 P52483 Q0P678 Q3TLH4 Q3UH06 Q52KI8 Q61062 Q61084 Q61656 Q62417 Q62433 Q6NZJ6 Q6PHZ5 Q76LS9 Q7TPV4 Q7TSH4 Q80UW2 Q80XH1 Q8BGD9 Q8BIG4 Q8BSY0 Q8BTI8 Q8BZ47 Q8CCH7 Q91W92 Q923D5 Q99J21 Q9CQS2 Q9D0M2 Q9QYR6 Q9WU62	GO_CC
Cluster4	cell body	3	37	14	255	1.48	0.331	O08553 Q8BGD9 Q9QYR6	GO_CC
Cluster4	cell cortex	1	37	5	255	1.38	0.546	Q8BSY0	GO_CC
Cluster4	cell junction	3	37	23	255	0.9	0.681	P39447 Q62417 Q62433	GO_CC
Cluster4	cell periphery	8	37	64	255	0.86	0.764	O08553 P29699 P39447 Q62417 Q62433 Q8BSY0 Q91W92 Q99J21	GO_CC
Cluster4	cell projection	4	37	34	255	0.81	0.767	O08553 Q80UW2 Q8BGD9 Q9QYR6	GO_CC
Cluster4	cell surface	1	37	7	255	0.98	0.671	P39447	GO_CC
Cluster4	cell-cell contact zone	1	37	5	255	1.38	0.546	P39447	GO_CC
Cluster4	cell-cell junction	3	37	19	255	1.09	0.541	P39447 Q62417 Q62433	GO_CC
Cluster4	cell-substrate junction	1	37	4	255	1.72	0.468	Q62417	GO_CC
Cluster4	central element	1	37	1	255	6.89	0.145	Q9WU62	GO_CC
Cluster4	centriole	1	37	3	255	2.3	0.376	Q7TSH4	GO_CC
Cluster4	centrosome	3	37	11	255	1.88	0.203	Q62417 Q62433 Q7TSH4	GO_CC
Cluster4	chromatin	2	37	12	255	1.15	0.542	Q61062 Q9WU62	GO_CC
Cluster4	chromocenter	1	37	1	255	6.89	0.145	Q9WU62	GO_CC
Cluster4	chromosomal region	2	37	6	255	2.3	0.211	Q8BIG4 Q9WU62	GO_CC
Cluster4	chromosome	3	37	25	255	0.83	0.738	Q61062 Q8BIG4 Q9WU62	GO_CC
Cluster4	chromosome, centromeric region	2	37	6	255	2.3	0.211	Q8BIG4 Q9WU62	GO_CC
Cluster4	cilium	1	37	6	255	1.15	0.614	Q9QYR6	GO_CC
Cluster4	condensed chromosome	1	37	5	255	1.38	0.546	Q9WU62	GO_CC
Cluster4	condensed nuclear chromosome	1	37	4	255	1.72	0.468	Q9WU62	GO_CC
Cluster4	contractile actin filament bundle	1	37	1	255	6.89	0.145	Q62417	GO_CC
Cluster4	cortical endoplasmic reticulum	1	37	1	255	6.89	0.145	Q8BSY0	GO_CC
Cluster4	cullin-RING ubiquitin ligase complex	1	37	2	255	3.45	0.27	Q80UW2	GO_CC
Cluster4	cytoplasm	28	37	190	255	1.02	0.521	E9Q137 E9Q5C9 O08553 P29699 P39447 P52483 Q3TLH4 Q3UH06 Q52KI8 Q61062 Q61084 Q61656 Q62417 Q62433 Q6NZJ6 Q7TPV4 Q7TSH4 Q80UW2 Q80XH1 Q8BGD9 Q8BSY0 Q8CCH7 Q91W92 Q923D5 Q99J21 Q9D0M2 Q9QYR6 Q9WU62	GO_CC
Cluster4	cytoplasmic region	1	37	7	255	0.98	0.671	Q8BSY0	GO_CC
Cluster4	cytoplasmic vesicle	5	37	33	255	1.04	0.542	E9Q137 P29699 P39447 Q62433 Q99J21	GO_CC
Cluster4	cytoplasmic vesicle lumen	2	37	4	255	3.45	0.102	E9Q137 P29699	GO_CC
Cluster4	cytoskeleton	5	37	42	255	0.82	0.772	Q62417 Q62433 Q7TSH4 Q9QYR6 Q9WU62	GO_CC
Cluster4	cytosol	19	37	131	255	1	0.572	O08553 P39447 P52483 Q3TLH4 Q52KI8 Q61062 Q61084 Q62417 Q62433 Q6NZJ6 Q7TSH4 Q80UW2 Q80XH1 Q8BGD9 Q923D5 Q99J21 Q9D0M2 Q9QYR6 Q9WU62	GO_CC
Cluster4	dendrite	4	37	16	255	1.72	0.187	O08553 Q80UW2 Q8BGD9 Q9QYR6	GO_CC
Cluster4	dendritic branch	1	37	1	255	6.89	0.145	Q9QYR6	GO_CC
Cluster4	dendritic microtubule	1	37	1	255	6.89	0.145	Q9QYR6	GO_CC
Cluster4	dendritic shaft	1	37	2	255	3.45	0.27	Q9QYR6	GO_CC
Cluster4	dendritic spine	1	37	2	255	3.45	0.27	Q80UW2	GO_CC
Cluster4	dendritic tree	4	37	16	255	1.72	0.187	O08553 Q80UW2 Q8BGD9 Q9QYR6	GO_CC
Cluster4	distal axon	1	37	6	255	1.15	0.614	O08553	GO_CC
Cluster4	DNA-directed RNA polymerase complex	1	37	5	255	1.38	0.546	Q8BZ47	GO_CC
Cluster4	endomembrane system	6	37	62	255	0.67	0.931	E9Q137 P29699 Q62433 Q6PHZ5 Q8BSY0 Q99J21	GO_CC
Cluster4	endoplasmic reticulum	2	37	21	255	0.66	0.842	P29699 Q8BSY0	GO_CC
Cluster4	endoplasmic reticulum lumen	1	37	3	255	2.3	0.376	P29699	GO_CC
Cluster4	endoplasmic reticulum membrane	1	37	10	255	0.69	0.798	Q8BSY0	GO_CC
Cluster4	endoplasmic reticulum subcompartment	1	37	10	255	0.69	0.798	Q8BSY0	GO_CC
Cluster4	endoplasmic reticulum tubular network	1	37	1	255	6.89	0.145	Q8BSY0	GO_CC
Cluster4	endosome	2	37	16	255	0.86	0.707	Q62433 Q99J21	GO_CC
Cluster4	endosome membrane	2	37	5	255	2.76	0.154	Q62433 Q99J21	GO_CC
Cluster4	envelope	1	37	14	255	0.49	0.895	Q6PHZ5	GO_CC
Cluster4	extracellular matrix	1	37	1	255	6.89	0.145	P29699	GO_CC
Cluster4	extracellular membrane-bounded organelle	1	37	1	255	6.89	0.145	P29699	GO_CC
Cluster4	extracellular organelle	1	37	1	255	6.89	0.145	P29699	GO_CC
Cluster4	extracellular region	2	37	12	255	1.15	0.542	E9Q137 P29699	GO_CC
Cluster4	extracellular space	1	37	3	255	2.3	0.376	P29699	GO_CC
Cluster4	fibrillar center	2	37	9	255	1.53	0.385	E9Q5C9 Q3UH06	GO_CC
Cluster4	focal adhesion	1	37	4	255	1.72	0.468	Q62417	GO_CC
Cluster4	Golgi apparatus	1	37	24	255	0.29	0.981	P29699	GO_CC
Cluster4	growth cone	1	37	4	255	1.72	0.468	O08553	GO_CC
Cluster4	heterochromatin	1	37	2	255	3.45	0.27	Q9WU62	GO_CC
Cluster4	insulin receptor complex	1	37	1	255	6.89	0.145	Q62417	GO_CC
Cluster4	integral component of membrane	4	37	16	255	1.72	0.187	Q62417 Q8BSY0 Q8CEF9 Q99J21	GO_CC
Cluster4	integral component of plasma membrane	2	37	9	255	1.53	0.385	Q62417 Q99J21	GO_CC
Cluster4	integrator complex	1	37	1	255	6.89	0.145	Q8BZ47	GO_CC
Cluster4	intercalated disc	1	37	4	255	1.72	0.468	P39447	GO_CC
Cluster4	intercellular canaliculus	1	37	1	255	6.89	0.145	P39447	GO_CC
Cluster4	intracellular	36	37	247	255	1	0.673	E9Q137 E9Q5C9 E9Q784 O08553 P29699 P39447 P52483 Q0P678 Q3TLH4 Q3UH06 Q52KI8 Q61062 Q61084 Q61656 Q62417 Q62433 Q6NZJ6 Q6PHZ5 Q76LS9 Q7TPV4 Q7TSH4 Q80UW2 Q80XH1 Q8BGD9 Q8BIG4 Q8BSY0 Q8BTI8 Q8BZ47 Q8CCH7 Q91W92 Q923D5 Q99J21 Q9CQS2 Q9D0M2 Q9QYR6 Q9WU62	GO_CC
Cluster4	intracellular membrane-bounded organelle	25	37	191	255	0.9	0.904	E9Q5C9 E9Q784 P29699 P39447 P52483 Q0P678 Q3UH06 Q52KI8 Q61062 Q61656 Q62417 Q62433 Q6NZJ6 Q6PHZ5 Q76LS9 Q7TPV4 Q8BSY0 Q8BTI8 Q8BZ47 Q8CCH7 Q923D5 Q99J21 Q9CQS2 Q9D0M2 Q9WU62	GO_CC
Cluster4	intracellular non-membrane-bounded organelle	12	37	87	255	0.95	0.659	E9Q5C9 Q3UH06 Q61062 Q61656 Q62417 Q62433 Q7TPV4 Q7TSH4 Q8BIG4 Q9CQS2 Q9QYR6 Q9WU62	GO_CC
Cluster4	intracellular organelle	29	37	220	255	0.91	0.955	E9Q137 E9Q5C9 E9Q784 P29699 P39447 P52483 Q0P678 Q3UH06 Q52KI8 Q61062 Q61656 Q62417 Q62433 Q6NZJ6 Q6PHZ5 Q76LS9 Q7TPV4 Q7TSH4 Q8BIG4 Q8BSY0 Q8BTI8 Q8BZ47 Q8CCH7 Q923D5 Q99J21 Q9CQS2 Q9D0M2 Q9QYR6 Q9WU62	GO_CC
Cluster4	intracellular organelle lumen	21	37	134	255	1.08	0.354	E9Q137 E9Q5C9 E9Q784 P29699 P52483 Q0P678 Q3UH06 Q52KI8 Q61062 Q61656 Q62417 Q6PHZ5 Q76LS9 Q7TPV4 Q8BTI8 Q8BZ47 Q8CCH7 Q923D5 Q9CQS2 Q9D0M2 Q9WU62	GO_CC
Cluster4	intracellular vesicle	5	37	33	255	1.04	0.542	E9Q137 P29699 P39447 Q62433 Q99J21	GO_CC
Cluster4	intrinsic component of membrane	4	37	16	255	1.72	0.187	Q62417 Q8BSY0 Q8CEF9 Q99J21	GO_CC
Cluster4	intrinsic component of plasma membrane	2	37	9	255	1.53	0.385	Q62417 Q99J21	GO_CC
Cluster4	kinetochore	2	37	5	255	2.76	0.154	Q8BIG4 Q9WU62	GO_CC
Cluster4	late endosome	1	37	3	255	2.3	0.376	Q99J21	GO_CC
Cluster4	lateral element	1	37	1	255	6.89	0.145	Q9WU62	GO_CC
Cluster4	lysosomal membrane	1	37	3	255	2.3	0.376	Q99J21	GO_CC
Cluster4	lysosome	1	37	7	255	0.98	0.671	Q99J21	GO_CC
Cluster4	lytic vacuole	1	37	7	255	0.98	0.671	Q99J21	GO_CC
Cluster4	lytic vacuole membrane	1	37	3	255	2.3	0.376	Q99J21	GO_CC
Cluster4	main axon	1	37	2	255	3.45	0.27	Q9QYR6	GO_CC
Cluster4	membrane	10	37	96	255	0.72	0.95	O08553 P29699 P39447 Q62417 Q62433 Q80UW2 Q8BSY0 Q8CEF9 Q91W92 Q99J21	GO_CC
Cluster4	membrane microdomain	1	37	5	255	1.38	0.546	Q62417	GO_CC
Cluster4	membrane protein complex	1	37	8	255	0.86	0.72	Q62417	GO_CC
Cluster4	membrane raft	1	37	5	255	1.38	0.546	Q62417	GO_CC
Cluster4	membrane region	1	37	6	255	1.15	0.614	Q62417	GO_CC
Cluster4	membrane-bounded organelle	27	37	202	255	0.92	0.889	E9Q137 E9Q5C9 E9Q784 P29699 P39447 P52483 Q0P678 Q3UH06 Q52KI8 Q61062 Q61656 Q62417 Q62433 Q6NZJ6 Q6PHZ5 Q76LS9 Q7TPV4 Q80UW2 Q8BSY0 Q8BTI8 Q8BZ47 Q8CCH7 Q923D5 Q99J21 Q9CQS2 Q9D0M2 Q9WU62	GO_CC
Cluster4	membrane-enclosed lumen	21	37	134	255	1.08	0.354	E9Q137 E9Q5C9 E9Q784 P29699 P52483 Q0P678 Q3UH06 Q52KI8 Q61062 Q61656 Q62417 Q6PHZ5 Q76LS9 Q7TPV4 Q8BTI8 Q8BZ47 Q8CCH7 Q923D5 Q9CQS2 Q9D0M2 Q9WU62	GO_CC
Cluster4	methyltransferase complex	2	37	5	255	2.76	0.154	E9Q784 Q6PHZ5	GO_CC
Cluster4	microtubule	2	37	6	255	2.3	0.211	Q62433 Q9QYR6	GO_CC
Cluster4	microtubule associated complex	1	37	4	255	1.72	0.468	Q9QYR6	GO_CC
Cluster4	microtubule cytoskeleton	5	37	29	255	1.19	0.415	Q62417 Q62433 Q7TSH4 Q9QYR6 Q9WU62	GO_CC
Cluster4	microtubule organizing center	3	37	17	255	1.22	0.46	Q62417 Q62433 Q7TSH4	GO_CC
Cluster4	midbody	1	37	4	255	1.72	0.468	Q9WU62	GO_CC
Cluster4	mRNA editing complex	2	37	3	255	4.59	0.056	E9Q784 Q6PHZ5	GO_CC
Cluster4	myelin sheath	2	37	4	255	3.45	0.102	O08553 Q62433	GO_CC
Cluster4	neuron projection	4	37	22	255	1.25	0.399	O08553 Q80UW2 Q8BGD9 Q9QYR6	GO_CC
Cluster4	neuron spine	1	37	2	255	3.45	0.27	Q80UW2	GO_CC
Cluster4	neuron to neuron synapse	1	37	6	255	1.15	0.614	Q9QYR6	GO_CC
Cluster4	neuronal cell body	3	37	14	255	1.48	0.331	O08553 Q8BGD9 Q9QYR6	GO_CC
Cluster4	NLS-dependent protein nuclear import complex	1	37	1	255	6.89	0.145	Q7TPV4	GO_CC
Cluster4	non-membrane-bounded organelle	12	37	87	255	0.95	0.659	E9Q5C9 Q3UH06 Q61062 Q61656 Q62417 Q62433 Q7TPV4 Q7TSH4 Q8BIG4 Q9CQS2 Q9QYR6 Q9WU62	GO_CC
Cluster4	non-motile cilium	1	37	1	255	6.89	0.145	Q9QYR6	GO_CC
Cluster4	nuclear body	11	37	38	255	2	0.0096	E9Q5C9 E9Q784 Q0P678 Q3UH06 Q52KI8 Q6PHZ5 Q76LS9 Q8BTI8 Q923D5 Q9CQS2 Q9WU62	GO_CC
Cluster4	nuclear chromatin	1	37	5	255	1.38	0.546	Q61062	GO_CC
Cluster4	nuclear chromosome	2	37	11	255	1.25	0.492	Q61062 Q9WU62	GO_CC
Cluster4	nuclear DNA-directed RNA polymerase complex	1	37	5	255	1.38	0.546	Q8BZ47	GO_CC
Cluster4	nuclear envelope	1	37	10	255	0.69	0.798	Q6PHZ5	GO_CC
Cluster4	nuclear lumen	19	37	127	255	1.03	0.49	E9Q5C9 E9Q784 P52483 Q0P678 Q3UH06 Q52KI8 Q61062 Q61656 Q62417 Q6PHZ5 Q76LS9 Q7TPV4 Q8BTI8 Q8BZ47 Q8CCH7 Q923D5 Q9CQS2 Q9D0M2 Q9WU62	GO_CC
Cluster4	nuclear matrix	2	37	9	255	1.53	0.385	Q52KI8 Q62417	GO_CC
Cluster4	nuclear periphery	2	37	10	255	1.38	0.44	Q52KI8 Q62417	GO_CC
Cluster4	nuclear speck	7	37	21	255	2.3	0.0192	E9Q784 Q0P678 Q3UH06 Q52KI8 Q6PHZ5 Q8BTI8 Q923D5	GO_CC
Cluster4	nucleocytoplasmic transport complex	1	37	1	255	6.89	0.145	Q7TPV4	GO_CC
Cluster4	nucleolus	5	37	22	255	1.57	0.198	E9Q5C9 Q3UH06 Q61656 Q7TPV4 Q9CQS2	GO_CC
Cluster4	nucleoplasm	16	37	115	255	0.96	0.663	E9Q5C9 E9Q784 P52483 Q0P678 Q3UH06 Q52KI8 Q6PHZ5 Q76LS9 Q7TPV4 Q8BTI8 Q8BZ47 Q8CCH7 Q923D5 Q9CQS2 Q9D0M2 Q9WU62	GO_CC
Cluster4	nucleus	22	37	165	255	0.92	0.819	E9Q5C9 E9Q784 P39447 P52483 Q0P678 Q3UH06 Q52KI8 Q61062 Q61656 Q62417 Q62433 Q6NZJ6 Q6PHZ5 Q76LS9 Q7TPV4 Q8BTI8 Q8BZ47 Q8CCH7 Q923D5 Q9CQS2 Q9D0M2 Q9WU62	GO_CC
Cluster4	organelle	30	37	222	255	0.93	0.919	E9Q137 E9Q5C9 E9Q784 P29699 P39447 P52483 Q0P678 Q3UH06 Q52KI8 Q61062 Q61656 Q62417 Q62433 Q6NZJ6 Q6PHZ5 Q76LS9 Q7TPV4 Q7TSH4 Q80UW2 Q8BIG4 Q8BSY0 Q8BTI8 Q8BZ47 Q8CCH7 Q923D5 Q99J21 Q9CQS2 Q9D0M2 Q9QYR6 Q9WU62	GO_CC
Cluster4	organelle envelope	1	37	14	255	0.49	0.895	Q6PHZ5	GO_CC
Cluster4	organelle lumen	21	37	134	255	1.08	0.354	E9Q137 E9Q5C9 E9Q784 P29699 P52483 Q0P678 Q3UH06 Q52KI8 Q61062 Q61656 Q62417 Q6PHZ5 Q76LS9 Q7TPV4 Q8BTI8 Q8BZ47 Q8CCH7 Q923D5 Q9CQS2 Q9D0M2 Q9WU62	GO_CC
Cluster4	organelle membrane	3	37	32	255	0.65	0.88	Q62433 Q80UW2 Q99J21	GO_CC
Cluster4	organelle subcompartment	1	37	16	255	0.43	0.925	Q8BSY0	GO_CC
Cluster4	pericentric heterochromatin	1	37	1	255	6.89	0.145	Q9WU62	GO_CC
Cluster4	perinuclear region of cytoplasm	1	37	17	255	0.41	0.937	Q62433	GO_CC
Cluster4	photoreceptor cell cilium	1	37	1	255	6.89	0.145	Q9QYR6	GO_CC
Cluster4	photoreceptor outer segment	1	37	1	255	6.89	0.145	Q9QYR6	GO_CC
Cluster4	plasma membrane	8	37	63	255	0.88	0.746	O08553 P29699 P39447 Q62417 Q62433 Q8BSY0 Q91W92 Q99J21	GO_CC
Cluster4	plasma membrane bounded cell projection	4	37	34	255	0.81	0.767	O08553 Q80UW2 Q8BGD9 Q9QYR6	GO_CC
Cluster4	plasma membrane protein complex	1	37	4	255	1.72	0.468	Q62417	GO_CC
Cluster4	plasma membrane region	1	37	14	255	0.49	0.895	P39447	GO_CC
Cluster4	plasma membrane signaling receptor complex	1	37	2	255	3.45	0.27	Q62417	GO_CC
Cluster4	platelet alpha granule	2	37	2	255	6.89	0.0206	E9Q137 P29699	GO_CC
Cluster4	platelet alpha granule lumen	2	37	2	255	6.89	0.0206	E9Q137 P29699	GO_CC
Cluster4	polymeric cytoskeletal fiber	2	37	8	255	1.72	0.327	Q62433 Q9QYR6	GO_CC
Cluster4	polysome	2	37	3	255	4.59	0.056	Q6NZJ6 Q8BGD9	GO_CC
Cluster4	postsynapse	2	37	8	255	1.72	0.327	Q80UW2 Q9QYR6	GO_CC
Cluster4	postsynaptic density	1	37	6	255	1.15	0.614	Q9QYR6	GO_CC
Cluster4	postsynaptic specialization	1	37	6	255	1.15	0.614	Q9QYR6	GO_CC
Cluster4	primary dendrite	1	37	1	255	6.89	0.145	Q9QYR6	GO_CC
Cluster4	protein kinase complex	1	37	5	255	1.38	0.546	Q62417	GO_CC
Cluster4	protein-containing complex	25	37	117	255	1.47	0.00356	E9Q5C9 E9Q784 O08553 P29699 P39447 Q0P678 Q52KI8 Q61062 Q61656 Q62417 Q6NZJ6 Q6PHZ5 Q7TPV4 Q7TSH4 Q80UW2 Q80XH1 Q8BGD9 Q8BIG4 Q8BTI8 Q8BZ47 Q923D5 Q99J21 Q9CQS2 Q9QYR6 Q9WU62	GO_CC
Cluster4	receptor complex	2	37	4	255	3.45	0.102	Q62417 Q99J21	GO_CC
Cluster4	recycling endosome	1	37	5	255	1.38	0.546	Q62433	GO_CC
Cluster4	recycling endosome membrane	1	37	2	255	3.45	0.27	Q62433	GO_CC
Cluster4	ribonucleoprotein complex	8	37	29	255	1.9	0.0394	E9Q5C9 Q52KI8 Q61656 Q6NZJ6 Q8BGD9 Q8BTI8 Q923D5 Q9CQS2	GO_CC
Cluster4	ribonucleoprotein granule	1	37	6	255	1.15	0.614	Q61656	GO_CC
Cluster4	RNA N6-methyladenosine methyltransferase complex	2	37	3	255	4.59	0.056	E9Q784 Q6PHZ5	GO_CC
Cluster4	RNA polymerase complex	1	37	5	255	1.38	0.546	Q8BZ47	GO_CC
Cluster4	RNA polymerase II, holoenzyme	1	37	4	255	1.72	0.468	Q8BZ47	GO_CC
Cluster4	SCF ubiquitin ligase complex	1	37	1	255	6.89	0.145	Q80UW2	GO_CC
Cluster4	secretory granule	2	37	9	255	1.53	0.385	E9Q137 P29699	GO_CC
Cluster4	secretory granule lumen	2	37	3	255	4.59	0.056	E9Q137 P29699	GO_CC
Cluster4	secretory vesicle	2	37	11	255	1.25	0.492	E9Q137 P29699	GO_CC
Cluster4	site of polarized growth	1	37	4	255	1.72	0.468	O08553	GO_CC
Cluster4	Sm-like protein family complex	1	37	4	255	1.72	0.468	E9Q5C9	GO_CC
Cluster4	small nuclear ribonucleoprotein complex	1	37	4	255	1.72	0.468	E9Q5C9	GO_CC
Cluster4	small nucleolar ribonucleoprotein complex	2	37	4	255	3.45	0.102	E9Q5C9 Q9CQS2	GO_CC
Cluster4	somatodendritic compartment	4	37	19	255	1.45	0.29	O08553 Q80UW2 Q8BGD9 Q9QYR6	GO_CC
Cluster4	spindle	1	37	8	255	0.86	0.72	Q9WU62	GO_CC
Cluster4	spliceosomal complex	4	37	13	255	2.12	0.102	Q52KI8 Q61656 Q8BTI8 Q923D5	GO_CC
Cluster4	stress fiber	1	37	1	255	6.89	0.145	Q62417	GO_CC
Cluster4	supramolecular complex	2	37	10	255	1.38	0.44	Q62433 Q9QYR6	GO_CC
Cluster4	supramolecular fiber	2	37	10	255	1.38	0.44	Q62433 Q9QYR6	GO_CC
Cluster4	supramolecular polymer	2	37	10	255	1.38	0.44	Q62433 Q9QYR6	GO_CC
Cluster4	synapse	2	37	15	255	0.92	0.671	Q80UW2 Q9QYR6	GO_CC
Cluster4	synaptonemal complex	1	37	1	255	6.89	0.145	Q9WU62	GO_CC
Cluster4	synaptonemal structure	1	37	1	255	6.89	0.145	Q9WU62	GO_CC
Cluster4	telomerase holoenzyme complex	1	37	1	255	6.89	0.145	Q9CQS2	GO_CC
Cluster4	tight junction	1	37	5	255	1.38	0.546	P39447	GO_CC
Cluster4	transferase complex	5	37	23	255	1.5	0.226	E9Q784 Q62417 Q6PHZ5 Q80UW2 Q8BZ47	GO_CC
Cluster4	U2-type catalytic step 2 spliceosome	1	37	1	255	6.89	0.145	Q8BTI8	GO_CC
Cluster4	U2-type spliceosomal complex	1	37	3	255	2.3	0.376	Q8BTI8	GO_CC
Cluster4	ubiquitin ligase complex	1	37	4	255	1.72	0.468	Q80UW2	GO_CC
Cluster4	vacuolar membrane	1	37	5	255	1.38	0.546	Q99J21	GO_CC
Cluster4	vacuole	1	37	8	255	0.86	0.72	Q99J21	GO_CC
Cluster4	vesicle	5	37	35	255	0.98	0.601	E9Q137 P29699 P39447 Q62433 Q99J21	GO_CC
Cluster4	vesicle lumen	2	37	4	255	3.45	0.102	E9Q137 P29699	GO_CC
Cluster4	whole membrane	3	37	22	255	0.94	0.649	Q62417 Q62433 Q99J21	GO_CC
Cluster4	Wnt signalosome	1	37	2	255	3.45	0.27	Q61062	GO_CC
Cluster4	zonula adherens	1	37	1	255	6.89	0.145	Q62417	GO_CC
Cluster5	A band	1	72	1	255	3.54	0.282	Q8C8R3	GO_CC
Cluster5	acetyltransferase complex	2	72	5	255	1.42	0.436	B2RRD7 Q61191	GO_CC
Cluster5	actin cytoskeleton	4	72	10	255	1.42	0.302	Q69Z38 Q6AW69 Q9QWY8 Q9QY06	GO_CC
Cluster5	actin filament	1	72	1	255	3.54	0.282	Q9QY06	GO_CC
Cluster5	actin-based cell projection	1	72	1	255	3.54	0.282	Q9QY06	GO_CC
Cluster5	adherens junction	4	72	12	255	1.18	0.453	Q5DTX6 Q69Z38 Q80U72 Q8C180	GO_CC
Cluster5	anchoring junction	5	72	13	255	1.36	0.29	O35691 Q5DTX6 Q69Z38 Q80U72 Q8C180	GO_CC
Cluster5	apical junction complex	2	72	8	255	0.89	0.712	Q3TN34 Q6AW69	GO_CC
Cluster5	apical part of cell	4	72	8	255	1.77	0.16	P98078 Q61165 Q6PAM0 Q80U72	GO_CC
Cluster5	apical plasma membrane	4	72	6	255	2.36	0.0552	P98078 Q61165 Q6PAM0 Q80U72	GO_CC
Cluster5	asymmetric synapse	1	72	6	255	0.59	0.867	Q80U72	GO_CC
Cluster5	ATPase complex	1	72	1	255	3.54	0.282	Q61165	GO_CC
Cluster5	ATPase dependent transmembrane transport complex	1	72	1	255	3.54	0.282	Q61165	GO_CC
Cluster5	axon	3	72	10	255	1.06	0.572	Q61191 Q8R1A4 Q9DBR4	GO_CC
Cluster5	azurophil granule	1	72	2	255	1.77	0.486	O88746	GO_CC
Cluster5	azurophil granule membrane	1	72	1	255	3.54	0.282	O88746	GO_CC
Cluster5	basal cortex	1	72	1	255	3.54	0.282	Q8K1N2	GO_CC
Cluster5	basal part of cell	2	72	2	255	3.54	0.0789	Q8K1N2 Q8R1A4	GO_CC
Cluster5	basolateral plasma membrane	3	72	4	255	2.66	0.0694	Q61165 Q80U72 Q8C8R3	GO_CC
Cluster5	Bcl-2 family protein complex	1	72	1	255	3.54	0.282	O54918	GO_CC
Cluster5	beta-catenin-TCF complex	1	72	1	255	3.54	0.282	Q9D219	GO_CC
Cluster5	bicellular tight junction	2	72	5	255	1.42	0.436	Q3TN34 Q6AW69	GO_CC
Cluster5	BIM-BCL-2 complex	1	72	1	255	3.54	0.282	O54918	GO_CC
Cluster5	BIM-BCL-xl complex	1	72	1	255	3.54	0.282	O54918	GO_CC
Cluster5	bounding membrane of organelle	7	72	18	255	1.38	0.217	O54918 O88746 P98078 Q6NVE8 Q6PIX5 Q8CFD4 Q8K382	GO_CC
Cluster5	cAMP-dependent protein kinase complex	1	72	1	255	3.54	0.282	Q6PAM0	GO_CC
Cluster5	catalytic complex	9	72	42	255	0.76	0.899	B2RRD7 O35691 O88796 Q3TLD5 Q5XJE5 Q61165 Q61191 Q6PAM0 Q8BZ47	GO_CC
Cluster5	catalytic step 2 spliceosome	1	72	8	255	0.44	0.933	O35691	GO_CC
Cluster5	cation-transporting ATPase complex	1	72	1	255	3.54	0.282	Q61165	GO_CC
Cluster5	Cdc73/Paf1 complex	1	72	2	255	1.77	0.486	Q5XJE5	GO_CC
Cluster5	cell	72	72	253	255	1.01	0.514	B2RRD7 E9Q6J5 F7BJB9 O35691 O54916 O54918 O70475 O70496 O88738 O88746 O88796 P05627 P33174 P54726 P70399 P70459 P81122 P98078 Q04863 Q3TLD5 Q3TN34 Q3UMG5 Q3UYV9 Q5DTX6 Q5XJE5 Q60949 Q61165 Q61191 Q69Z38 Q69ZR2 Q6A000 Q6A0A9 Q6AW69 Q6NVE8 Q6PAM0 Q6PCL9 Q6PFR5 Q6PIX5 Q6Y685 Q80TM9 Q80U72 Q80V62 Q80WC3 Q8BHL3 Q8BQZ4 Q8BUH8 Q8BZ32 Q8BZ47 Q8C180 Q8C735 Q8C8R3 Q8CFD4 Q8CGF1 Q8JZN5 Q8K019 Q8K1N2 Q8K382 …	GO_CC
Cluster5	cell body	2	72	14	255	0.51	0.942	Q61191 Q8K382	GO_CC
Cluster5	cell cortex	2	72	5	255	1.42	0.436	Q8K1N2 Q9QY06	GO_CC
Cluster5	cell cortex region	1	72	1	255	3.54	0.282	Q8K1N2	GO_CC
Cluster5	cell junction	9	72	23	255	1.39	0.164	O35691 Q3TN34 Q5DTX6 Q61165 Q69Z38 Q6AW69 Q80U72 Q8C180 Q8C8R3	GO_CC
Cluster5	cell leading edge	6	72	9	255	2.36	0.0169	Q5DTX6 Q61165 Q80U72 Q8K1N2 Q9DBR4 Q9QY06	GO_CC
Cluster5	cell periphery	21	72	64	255	1.16	0.217	B2RRD7 O35691 O54916 O88746 P81122 P98078 Q3TN34 Q3UMG5 Q5DTX6 Q61165 Q6PAM0 Q80TM9 Q80U72 Q8BHL3 Q8BUH8 Q8C180 Q8C8R3 Q8K1N2 Q8VBT9 Q9QWY8 Q9QY06	GO_CC
Cluster5	cell projection	11	72	34	255	1.15	0.349	Q3TN34 Q5DTX6 Q61165 Q61191 Q80U72 Q8JZN5 Q8K382 Q8R1A4 Q9DBR4 Q9QWY8 Q9QY06	GO_CC
Cluster5	cell projection membrane	2	72	4	255	1.77	0.317	Q5DTX6 Q9QWY8	GO_CC
Cluster5	cell surface	1	72	7	255	0.51	0.905	Q61165	GO_CC
Cluster5	cell-cell contact zone	3	72	5	255	2.12	0.138	Q61165 Q80U72 Q8C8R3	GO_CC
Cluster5	cell-cell junction	8	72	19	255	1.49	0.13	O35691 Q3TN34 Q5DTX6 Q61165 Q6AW69 Q80U72 Q8C180 Q8C8R3	GO_CC
Cluster5	cell-substrate junction	1	72	4	255	0.89	0.737	Q69Z38	GO_CC
Cluster5	centriolar satellite	1	72	2	255	1.77	0.486	Q6A000	GO_CC
Cluster5	centrosome	2	72	11	255	0.64	0.867	Q5XJE5 Q6A000	GO_CC
Cluster5	chromatin	2	72	12	255	0.59	0.899	P05627 Q80WC3	GO_CC
Cluster5	chromatin silencing complex	1	72	1	255	3.54	0.282	Q80WC3	GO_CC
Cluster5	chromosomal region	1	72	6	255	0.59	0.867	P70399	GO_CC
Cluster5	chromosome	5	72	25	255	0.71	0.887	P05627 P33174 P70399 Q80V62 Q80WC3	GO_CC
Cluster5	chromosome, centromeric region	1	72	6	255	0.59	0.867	P70399	GO_CC
Cluster5	chromosome, telomeric region	1	72	1	255	3.54	0.282	P70399	GO_CC
Cluster5	cis-Golgi network	1	72	1	255	3.54	0.282	Q9D219	GO_CC
Cluster5	clathrin coat	1	72	1	255	3.54	0.282	P98078	GO_CC
Cluster5	clathrin coat of coated pit	1	72	1	255	3.54	0.282	P98078	GO_CC
Cluster5	clathrin-coated pit	2	72	2	255	3.54	0.0789	O54916 P98078	GO_CC
Cluster5	clathrin-coated vesicle	2	72	3	255	2.36	0.193	P98078 Q8K382	GO_CC
Cluster5	clathrin-coated vesicle membrane	2	72	2	255	3.54	0.0789	P98078 Q8K382	GO_CC
Cluster5	coated membrane	1	72	1	255	3.54	0.282	P98078	GO_CC
Cluster5	coated vesicle	2	72	3	255	2.36	0.193	P98078 Q8K382	GO_CC
Cluster5	coated vesicle membrane	2	72	2	255	3.54	0.0789	P98078 Q8K382	GO_CC
Cluster5	condensed chromosome	1	72	5	255	0.71	0.813	Q80V62	GO_CC
Cluster5	contractile fiber	1	72	2	255	1.77	0.486	Q8C8R3	GO_CC
Cluster5	costamere	1	72	1	255	3.54	0.282	Q8C8R3	GO_CC
Cluster5	cytoplasm	54	72	190	255	1.01	0.523	B2RRD7 O35691 O54916 O54918 O70475 O70496 O88738 O88746 P05627 P33174 P54726 P70399 P70459 P81122 P98078 Q04863 Q3TLD5 Q3TN34 Q3UYV9 Q5DTX6 Q60949 Q61165 Q61191 Q69ZR2 Q6A000 Q6A0A9 Q6NVE8 Q6PAM0 Q6PCL9 Q6PIX5 Q6Y685 Q80TM9 Q80U72 Q80V62 Q80WC3 Q8BQZ4 Q8C180 Q8C8R3 Q8CFD4 Q8CGF1 Q8JZN5 Q8K019 Q8K1N2 Q8K382 Q8VBT9 Q99LI2 Q9D0F4 Q9D219 Q9DBR4 Q9EQN3 Q9QWY8 Q9QY06 Q9WVS8 Q9Z131	GO_CC
Cluster5	cytoplasmic region	2	72	7	255	1.01	0.635	Q8K1N2 Q9QY06	GO_CC
Cluster5	cytoplasmic side of membrane	1	72	5	255	0.71	0.813	Q8VBT9	GO_CC
Cluster5	cytoplasmic side of plasma membrane	1	72	4	255	0.89	0.737	Q8VBT9	GO_CC
Cluster5	cytoplasmic vesicle	11	72	33	255	1.18	0.306	O70496 O88738 O88746 P98078 Q3TN34 Q6NVE8 Q80TM9 Q8C180 Q8CFD4 Q8K382 Q8VBT9	GO_CC
Cluster5	cytoplasmic vesicle membrane	4	72	9	255	1.57	0.228	O88746 P98078 Q8K382 Q8VBT9	GO_CC
Cluster5	cytoskeleton	14	72	42	255	1.18	0.266	O35691 O88738 P33174 P54726 Q3TN34 Q5XJE5 Q69Z38 Q6A000 Q6AW69 Q6NVE8 Q6Y685 Q8K1N2 Q9QWY8 Q9QY06	GO_CC
Cluster5	cytosol	36	72	131	255	0.97	0.661	B2RRD7 O54916 O54918 O70475 O88746 P05627 P33174 P54726 P70459 P81122 P98078 Q04863 Q3TLD5 Q3TN34 Q3UYV9 Q60949 Q6A000 Q6A0A9 Q6NVE8 Q6PAM0 Q6PCL9 Q80TM9 Q80U72 Q80V62 Q80WC3 Q8BQZ4 Q8C180 Q8C8R3 Q8CGF1 Q8K1N2 Q8K382 Q8VBT9 Q9D0F4 Q9QWY8 Q9QY06 Q9WVS8	GO_CC
Cluster5	dendrite	4	72	16	255	0.89	0.711	Q61191 Q8JZN5 Q8K382 Q9QWY8	GO_CC
Cluster5	dendritic spine	1	72	2	255	1.77	0.486	Q9QWY8	GO_CC
Cluster5	dendritic tree	4	72	16	255	0.89	0.711	Q61191 Q8JZN5 Q8K382 Q9QWY8	GO_CC
Cluster5	desmosome	1	72	1	255	3.54	0.282	O35691	GO_CC
Cluster5	distal axon	2	72	6	255	1.18	0.543	Q8R1A4 Q9DBR4	GO_CC
Cluster5	DNA repair complex	1	72	1	255	3.54	0.282	P70399	GO_CC
Cluster5	DNA-directed RNA polymerase complex	3	72	5	255	2.12	0.138	Q3TLD5 Q5XJE5 Q8BZ47	GO_CC
Cluster5	early endosome	3	72	7	255	1.52	0.312	O88746 Q80TM9 Q8CFD4	GO_CC
Cluster5	early endosome membrane	1	72	1	255	3.54	0.282	Q8CFD4	GO_CC
Cluster5	endomembrane system	16	72	62	255	0.91	0.74	O54916 O88738 O88746 P98078 Q3TN34 Q60949 Q61165 Q6NVE8 Q6PIX5 Q80TM9 Q80WC3 Q8BHL3 Q8C180 Q8CFD4 Q99LI2 Q9D219	GO_CC
Cluster5	endonuclease complex	1	72	4	255	0.89	0.737	O88796	GO_CC
Cluster5	endoplasmic reticulum	3	72	21	255	0.51	0.966	Q61165 Q6PIX5 Q99LI2	GO_CC
Cluster5	endoplasmic reticulum membrane	2	72	10	255	0.71	0.827	Q61165 Q6PIX5	GO_CC
Cluster5	endoplasmic reticulum subcompartment	2	72	10	255	0.71	0.827	Q61165 Q6PIX5	GO_CC
Cluster5	endoribonuclease complex	1	72	4	255	0.89	0.737	O88796	GO_CC
Cluster5	endosome	7	72	16	255	1.55	0.129	O88738 O88746 Q3TN34 Q6NVE8 Q80TM9 Q8C180 Q8CFD4	GO_CC
Cluster5	endosome membrane	2	72	5	255	1.42	0.436	Q6NVE8 Q8CFD4	GO_CC
Cluster5	envelope	3	72	14	255	0.76	0.81	O54918 Q80WC3 Q8JZN5	GO_CC
Cluster5	euchromatin	1	72	1	255	3.54	0.282	P05627	GO_CC
Cluster5	exon-exon junction complex	1	72	2	255	1.77	0.486	O35691	GO_CC
Cluster5	extracellular region	1	72	12	255	0.3	0.983	P33174	GO_CC
Cluster5	extrinsic component of membrane	3	72	5	255	2.12	0.138	O54918 Q8CFD4 Q8VBT9	GO_CC
Cluster5	fibrillar center	2	72	9	255	0.79	0.776	P98078 Q5XJE5	GO_CC
Cluster5	filopodium	1	72	1	255	3.54	0.282	Q9QY06	GO_CC
Cluster5	filopodium tip	1	72	1	255	3.54	0.282	Q9QY06	GO_CC
Cluster5	focal adhesion	1	72	4	255	0.89	0.737	Q69Z38	GO_CC
Cluster5	Golgi apparatus	5	72	24	255	0.74	0.862	O88738 Q6NVE8 Q6PIX5 Q99LI2 Q9D219	GO_CC
Cluster5	Golgi apparatus subcompartment	3	72	8	255	1.33	0.403	O88738 Q6NVE8 Q6PIX5	GO_CC
Cluster5	Golgi membrane	1	72	4	255	0.89	0.737	Q6PIX5	GO_CC
Cluster5	growth cone	2	72	4	255	1.77	0.317	Q8R1A4 Q9DBR4	GO_CC
Cluster5	H3 histone acetyltransferase complex	1	72	3	255	1.18	0.632	B2RRD7	GO_CC
Cluster5	histone acetyltransferase complex	2	72	4	255	1.77	0.317	B2RRD7 Q61191	GO_CC
Cluster5	histone methyltransferase complex	1	72	1	255	3.54	0.282	Q61191	GO_CC
Cluster5	I band	1	72	2	255	1.77	0.486	Q8C8R3	GO_CC
Cluster5	I-kappaB/NF-kappaB complex	1	72	1	255	3.54	0.282	Q04863	GO_CC
Cluster5	integral component of membrane	2	72	16	255	0.44	0.968	Q61165 Q8C180	GO_CC
Cluster5	integral component of plasma membrane	2	72	9	255	0.79	0.776	Q61165 Q8C180	GO_CC
Cluster5	integrator complex	1	72	1	255	3.54	0.282	Q8BZ47	GO_CC
Cluster5	intercalated disc	2	72	4	255	1.77	0.317	Q61165 Q8C8R3	GO_CC
Cluster5	intercellular bridge	1	72	2	255	1.77	0.486	P33174	GO_CC
Cluster5	intermediate filament	1	72	1	255	3.54	0.282	O35691	GO_CC
Cluster5	intermediate filament cytoskeleton	2	72	3	255	2.36	0.193	O35691 Q8K1N2	GO_CC
Cluster5	intracellular	70	72	247	255	1	0.597	B2RRD7 E9Q6J5 F7BJB9 O35691 O54916 O54918 O70475 O70496 O88738 O88746 O88796 P05627 P33174 P54726 P70399 P70459 P81122 P98078 Q04863 Q3TLD5 Q3TN34 Q3UYV9 Q5DTX6 Q5XJE5 Q60949 Q61165 Q61191 Q69Z38 Q69ZR2 Q6A000 Q6A0A9 Q6AW69 Q6NVE8 Q6PAM0 Q6PCL9 Q6PFR5 Q6PIX5 Q6Y685 Q80TM9 Q80U72 Q80V62 Q80WC3 Q8BHL3 Q8BQZ4 Q8BUH8 Q8BZ32 Q8BZ47 Q8C180 Q8C735 Q8C8R3 Q8CFD4 Q8CGF1 Q8JZN5 Q8K019 Q8K1N2 Q8K382 Q8VBT9 …	GO_CC
Cluster5	intracellular membrane-bounded organelle	51	72	191	255	0.95	0.864	B2RRD7 E9Q6J5 F7BJB9 O35691 O54918 O70475 O70496 O88738 O88746 O88796 P05627 P33174 P54726 P70399 P70459 P98078 Q04863 Q3TLD5 Q3UYV9 Q5XJE5 Q61165 Q61191 Q6A0A9 Q6NVE8 Q6PAM0 Q6PCL9 Q6PFR5 Q6PIX5 Q80U72 Q80V62 Q80WC3 Q8BUH8 Q8BZ32 Q8BZ47 Q8C735 Q8CFD4 Q8JZN5 Q8K019 Q8K382 Q8VBT9 Q99LI2 Q99PP7 Q9D0F4 Q9D219 Q9D4J7 Q9DBR4 Q9DBY0 Q9EQN3 Q9JL61 Q9WVS8 Q9Z131	GO_CC
Cluster5	intracellular non-membrane-bounded organelle	23	72	87	255	0.94	0.726	O35691 O88738 O88796 P05627 P33174 P54726 P70399 P98078 Q3TN34 Q5XJE5 Q69Z38 Q6A000 Q6AW69 Q6NVE8 Q6PFR5 Q6Y685 Q80V62 Q80WC3 Q8C8R3 Q8K1N2 Q9D4J7 Q9QWY8 Q9QY06	GO_CC
Cluster5	intracellular organelle	62	72	220	255	1	0.606	B2RRD7 E9Q6J5 F7BJB9 O35691 O54918 O70475 O70496 O88738 O88746 O88796 P05627 P33174 P54726 P70399 P70459 P98078 Q04863 Q3TLD5 Q3TN34 Q3UYV9 Q5XJE5 Q61165 Q61191 Q69Z38 Q6A000 Q6A0A9 Q6AW69 Q6NVE8 Q6PAM0 Q6PCL9 Q6PFR5 Q6PIX5 Q6Y685 Q80TM9 Q80U72 Q80V62 Q80WC3 Q8BUH8 Q8BZ32 Q8BZ47 Q8C180 Q8C735 Q8C8R3 Q8CFD4 Q8JZN5 Q8K019 Q8K1N2 Q8K382 Q8VBT9 Q99LI2 Q99PP7 Q9D0F4 Q9D219 Q9D4J7 Q9DBR4 Q9DBY0 Q9EQN3 …	GO_CC
Cluster5	intracellular organelle lumen	37	72	134	255	0.98	0.645	B2RRD7 E9Q6J5 F7BJB9 O35691 O70475 O70496 O88796 P05627 P33174 P54726 P70399 P70459 P98078 Q04863 Q3TLD5 Q3UYV9 Q5XJE5 Q61165 Q61191 Q6PAM0 Q6PCL9 Q6PFR5 Q80U72 Q80V62 Q80WC3 Q8BZ32 Q8BZ47 Q8C735 Q8K019 Q8K382 Q8VBT9 Q99PP7 Q9D0F4 Q9D219 Q9D4J7 Q9WVS8 Q9Z131	GO_CC
Cluster5	intracellular vesicle	11	72	33	255	1.18	0.306	O70496 O88738 O88746 P98078 Q3TN34 Q6NVE8 Q80TM9 Q8C180 Q8CFD4 Q8K382 Q8VBT9	GO_CC
Cluster5	intrinsic component of membrane	2	72	16	255	0.44	0.968	Q61165 Q8C180	GO_CC
Cluster5	intrinsic component of plasma membrane	2	72	9	255	0.79	0.776	Q61165 Q8C180	GO_CC
Cluster5	kinesin complex	1	72	2	255	1.77	0.486	P33174	GO_CC
Cluster5	kinetochore	1	72	5	255	0.71	0.813	P70399	GO_CC
Cluster5	lamellipodium	4	72	6	255	2.36	0.0552	Q61165 Q80U72 Q9DBR4 Q9QY06	GO_CC
Cluster5	leading edge membrane	1	72	2	255	1.77	0.486	Q5DTX6	GO_CC
Cluster5	lysosomal membrane	2	72	3	255	2.36	0.193	O88746 P98078	GO_CC
Cluster5	lysosome	2	72	7	255	1.01	0.635	O88746 P98078	GO_CC
Cluster5	lytic vacuole	2	72	7	255	1.01	0.635	O88746 P98078	GO_CC
Cluster5	lytic vacuole membrane	2	72	3	255	2.36	0.193	O88746 P98078	GO_CC
Cluster5	M band	1	72	1	255	3.54	0.282	Q8C8R3	GO_CC
Cluster5	membrane	29	72	96	255	1.07	0.343	B2RRD7 O35691 O54916 O54918 O88738 O88746 P81122 P98078 Q3TN34 Q3UMG5 Q5DTX6 Q61165 Q6NVE8 Q6PAM0 Q6PIX5 Q80TM9 Q80U72 Q80WC3 Q8BHL3 Q8BUH8 Q8C180 Q8C8R3 Q8CFD4 Q8JZN5 Q8K1N2 Q8K382 Q8VBT9 Q9DBR4 Q9QWY8	GO_CC
Cluster5	membrane coat	1	72	1	255	3.54	0.282	P98078	GO_CC
Cluster5	membrane microdomain	1	72	5	255	0.71	0.813	Q61165	GO_CC
Cluster5	membrane protein complex	2	72	8	255	0.89	0.712	P98078 Q61165	GO_CC
Cluster5	membrane raft	1	72	5	255	0.71	0.813	Q61165	GO_CC
Cluster5	membrane region	1	72	6	255	0.59	0.867	Q61165	GO_CC
Cluster5	membrane-bounded organelle	54	72	202	255	0.95	0.886	B2RRD7 E9Q6J5 F7BJB9 O35691 O54918 O70475 O70496 O88738 O88746 O88796 P05627 P33174 P54726 P70399 P70459 P98078 Q04863 Q3TLD5 Q3TN34 Q3UYV9 Q5XJE5 Q61165 Q61191 Q6A0A9 Q6NVE8 Q6PAM0 Q6PCL9 Q6PFR5 Q6PIX5 Q80TM9 Q80U72 Q80V62 Q80WC3 Q8BUH8 Q8BZ32 Q8BZ47 Q8C180 Q8C735 Q8CFD4 Q8JZN5 Q8K019 Q8K382 Q8VBT9 Q99LI2 Q99PP7 Q9D0F4 Q9D219 Q9D4J7 Q9DBR4 Q9DBY0 Q9EQN3 Q9JL61 Q9WVS8 Q9Z131	GO_CC
Cluster5	membrane-enclosed lumen	37	72	134	255	0.98	0.645	B2RRD7 E9Q6J5 F7BJB9 O35691 O70475 O70496 O88796 P05627 P33174 P54726 P70399 P70459 P98078 Q04863 Q3TLD5 Q3UYV9 Q5XJE5 Q61165 Q61191 Q6PAM0 Q6PCL9 Q6PFR5 Q80U72 Q80V62 Q80WC3 Q8BZ32 Q8BZ47 Q8C735 Q8K019 Q8K382 Q8VBT9 Q99PP7 Q9D0F4 Q9D219 Q9D4J7 Q9WVS8 Q9Z131	GO_CC
Cluster5	methyltransferase complex	1	72	5	255	0.71	0.813	Q61191	GO_CC
Cluster5	microtubule	2	72	6	255	1.18	0.543	P33174 Q6NVE8	GO_CC
Cluster5	microtubule associated complex	1	72	4	255	0.89	0.737	P33174	GO_CC
Cluster5	microtubule cytoskeleton	7	72	29	255	0.85	0.766	O88738 P33174 P54726 Q5XJE5 Q6A000 Q6NVE8 Q6Y685	GO_CC
Cluster5	microtubule organizing center	4	72	17	255	0.83	0.76	O88738 P54726 Q5XJE5 Q6A000	GO_CC
Cluster5	midbody	2	72	4	255	1.77	0.317	O88738 P33174	GO_CC
Cluster5	mitochondrial envelope	2	72	4	255	1.77	0.317	O54918 Q8JZN5	GO_CC
Cluster5	mitochondrial inner membrane	1	72	2	255	1.77	0.486	Q8JZN5	GO_CC
Cluster5	mitochondrial membrane	2	72	4	255	1.77	0.317	O54918 Q8JZN5	GO_CC
Cluster5	mitochondrial outer membrane	1	72	2	255	1.77	0.486	O54918	GO_CC
Cluster5	mitochondrion	7	72	18	255	1.38	0.217	O54918 Q3UYV9 Q61165 Q80WC3 Q8JZN5 Q8K019 Q9Z131	GO_CC
Cluster5	MLL1 complex	1	72	1	255	3.54	0.282	Q61191	GO_CC
Cluster5	MLL1/2 complex	1	72	1	255	3.54	0.282	Q61191	GO_CC
Cluster5	MOZ/MORF histone acetyltransferase complex	1	72	3	255	1.18	0.632	B2RRD7	GO_CC
Cluster5	mRNA cap binding complex	1	72	2	255	1.77	0.486	Q3UYV9	GO_CC
Cluster5	multimeric ribonuclease P complex	1	72	1	255	3.54	0.282	O88796	GO_CC
Cluster5	myelin sheath	1	72	4	255	0.89	0.737	Q80U72	GO_CC
Cluster5	myelin sheath abaxonal region	1	72	1	255	3.54	0.282	Q80U72	GO_CC
Cluster5	myofibril	1	72	2	255	1.77	0.486	Q8C8R3	GO_CC
Cluster5	neuron projection	7	72	22	255	1.13	0.432	Q3TN34 Q61191 Q8JZN5 Q8K382 Q8R1A4 Q9DBR4 Q9QWY8	GO_CC
Cluster5	neuron spine	1	72	2	255	1.77	0.486	Q9QWY8	GO_CC
Cluster5	neuron to neuron synapse	1	72	6	255	0.59	0.867	Q80U72	GO_CC
Cluster5	neuronal cell body	2	72	14	255	0.51	0.942	Q61191 Q8K382	GO_CC
Cluster5	non-membrane-bounded organelle	23	72	87	255	0.94	0.726	O35691 O88738 O88796 P05627 P33174 P54726 P70399 P98078 Q3TN34 Q5XJE5 Q69Z38 Q6A000 Q6AW69 Q6NVE8 Q6PFR5 Q6Y685 Q80V62 Q80WC3 Q8C8R3 Q8K1N2 Q9D4J7 Q9QWY8 Q9QY06	GO_CC
Cluster5	nuclear body	8	72	38	255	0.75	0.899	F7BJB9 O35691 P70399 Q6PCL9 Q80V62 Q8K019 Q9WVS8 Q9Z131	GO_CC
Cluster5	nuclear cap binding complex	1	72	1	255	3.54	0.282	Q3UYV9	GO_CC
Cluster5	nuclear chromatin	1	72	5	255	0.71	0.813	P05627	GO_CC
Cluster5	nuclear chromosome	2	72	11	255	0.64	0.867	P05627 P70399	GO_CC
Cluster5	nuclear chromosome, telomeric region	1	72	1	255	3.54	0.282	P70399	GO_CC
Cluster5	nuclear DNA-directed RNA polymerase complex	3	72	5	255	2.12	0.138	Q3TLD5 Q5XJE5 Q8BZ47	GO_CC
Cluster5	nuclear envelope	1	72	10	255	0.35	0.966	Q80WC3	GO_CC
Cluster5	nuclear euchromatin	1	72	1	255	3.54	0.282	P05627	GO_CC
Cluster5	nuclear lumen	37	72	127	255	1.03	0.429	B2RRD7 E9Q6J5 F7BJB9 O35691 O70475 O70496 O88796 P05627 P33174 P54726 P70399 P70459 P98078 Q04863 Q3TLD5 Q3UYV9 Q5XJE5 Q61165 Q61191 Q6PAM0 Q6PCL9 Q6PFR5 Q80U72 Q80V62 Q80WC3 Q8BZ32 Q8BZ47 Q8C735 Q8K019 Q8K382 Q8VBT9 Q99PP7 Q9D0F4 Q9D219 Q9D4J7 Q9WVS8 Q9Z131	GO_CC
Cluster5	nuclear matrix	1	72	9	255	0.39	0.952	P33174	GO_CC
Cluster5	nuclear membrane	1	72	8	255	0.44	0.933	Q80WC3	GO_CC
Cluster5	nuclear periphery	1	72	10	255	0.35	0.966	P33174	GO_CC
Cluster5	nuclear speck	2	72	21	255	0.34	0.993	O35691 Q8K019	GO_CC
Cluster5	nucleolar ribonuclease P complex	1	72	1	255	3.54	0.282	O88796	GO_CC
Cluster5	nucleolus	6	72	22	255	0.97	0.627	O88796 P98078 Q5XJE5 Q6PFR5 Q80V62 Q9D4J7	GO_CC
Cluster5	nucleoplasm	35	72	115	255	1.08	0.285	B2RRD7 E9Q6J5 F7BJB9 O35691 O70475 O70496 O88796 P05627 P33174 P54726 P70399 P70459 Q04863 Q3TLD5 Q3UYV9 Q5XJE5 Q61165 Q61191 Q6PAM0 Q6PCL9 Q80U72 Q80V62 Q80WC3 Q8BZ32 Q8BZ47 Q8C735 Q8K019 Q8K382 Q8VBT9 Q99PP7 Q9D0F4 Q9D219 Q9D4J7 Q9WVS8 Q9Z131	GO_CC
Cluster5	nucleotide-activated protein kinase complex	1	72	2	255	1.77	0.486	Q6PAM0	GO_CC
Cluster5	nucleus	45	72	165	255	0.97	0.73	B2RRD7 E9Q6J5 F7BJB9 O35691 O70475 O70496 O88796 P05627 P33174 P54726 P70399 P70459 P98078 Q04863 Q3TLD5 Q3UYV9 Q5XJE5 Q61165 Q61191 Q6A0A9 Q6PAM0 Q6PCL9 Q6PFR5 Q80U72 Q80V62 Q80WC3 Q8BUH8 Q8BZ32 Q8BZ47 Q8C735 Q8JZN5 Q8K019 Q8K382 Q8VBT9 Q99LI2 Q99PP7 Q9D0F4 Q9D219 Q9D4J7 Q9DBR4 Q9DBY0 Q9EQN3 Q9JL61 Q9WVS8 Q9Z131	GO_CC
Cluster5	organelle	62	72	222	255	0.99	0.694	B2RRD7 E9Q6J5 F7BJB9 O35691 O54918 O70475 O70496 O88738 O88746 O88796 P05627 P33174 P54726 P70399 P70459 P98078 Q04863 Q3TLD5 Q3TN34 Q3UYV9 Q5XJE5 Q61165 Q61191 Q69Z38 Q6A000 Q6A0A9 Q6AW69 Q6NVE8 Q6PAM0 Q6PCL9 Q6PFR5 Q6PIX5 Q6Y685 Q80TM9 Q80U72 Q80V62 Q80WC3 Q8BUH8 Q8BZ32 Q8BZ47 Q8C180 Q8C735 Q8C8R3 Q8CFD4 Q8JZN5 Q8K019 Q8K1N2 Q8K382 Q8VBT9 Q99LI2 Q99PP7 Q9D0F4 Q9D219 Q9D4J7 Q9DBR4 Q9DBY0 Q9EQN3 …	GO_CC
Cluster5	organelle envelope	3	72	14	255	0.76	0.81	O54918 Q80WC3 Q8JZN5	GO_CC
Cluster5	organelle inner membrane	1	72	3	255	1.18	0.632	Q8JZN5	GO_CC
Cluster5	organelle lumen	37	72	134	255	0.98	0.645	B2RRD7 E9Q6J5 F7BJB9 O35691 O70475 O70496 O88796 P05627 P33174 P54726 P70399 P70459 P98078 Q04863 Q3TLD5 Q3UYV9 Q5XJE5 Q61165 Q61191 Q6PAM0 Q6PCL9 Q6PFR5 Q80U72 Q80V62 Q80WC3 Q8BZ32 Q8BZ47 Q8C735 Q8K019 Q8K382 Q8VBT9 Q99PP7 Q9D0F4 Q9D219 Q9D4J7 Q9WVS8 Q9Z131	GO_CC
Cluster5	organelle membrane	10	72	32	255	1.11	0.414	O54918 O88746 P98078 Q6NVE8 Q6PIX5 Q80WC3 Q8CFD4 Q8JZN5 Q8K382 Q8VBT9	GO_CC
Cluster5	organelle outer membrane	1	72	2	255	1.77	0.486	O54918	GO_CC
Cluster5	organelle subcompartment	4	72	16	255	0.89	0.711	O88738 Q61165 Q6NVE8 Q6PIX5	GO_CC
Cluster5	outer membrane	1	72	2	255	1.77	0.486	O54918	GO_CC
Cluster5	perinuclear region of cytoplasm	6	72	17	255	1.25	0.338	P98078 Q5DTX6 Q61165 Q6NVE8 Q8VBT9 Q9QY06	GO_CC
Cluster5	plasma membrane	20	72	63	255	1.12	0.288	B2RRD7 O35691 O54916 O88746 P81122 P98078 Q3TN34 Q3UMG5 Q5DTX6 Q61165 Q6PAM0 Q80TM9 Q80U72 Q8BHL3 Q8BUH8 Q8C180 Q8C8R3 Q8K1N2 Q8VBT9 Q9QWY8	GO_CC
Cluster5	plasma membrane bounded cell projection	11	72	34	255	1.15	0.349	Q3TN34 Q5DTX6 Q61165 Q61191 Q80U72 Q8JZN5 Q8K382 Q8R1A4 Q9DBR4 Q9QWY8 Q9QY06	GO_CC
Cluster5	plasma membrane protein complex	1	72	4	255	0.89	0.737	P98078	GO_CC
Cluster5	plasma membrane region	7	72	14	255	1.77	0.0645	P98078 Q5DTX6 Q61165 Q6PAM0 Q80U72 Q8C8R3 Q9QWY8	GO_CC
Cluster5	PML body	2	72	2	255	3.54	0.0789	F7BJB9 Q9WVS8	GO_CC
Cluster5	podosome	1	72	3	255	1.18	0.632	Q9QWY8	GO_CC
Cluster5	polymeric cytoskeletal fiber	4	72	8	255	1.77	0.16	O35691 P33174 Q6NVE8 Q9QY06	GO_CC
Cluster5	postsynapse	2	72	8	255	0.89	0.712	Q80U72 Q9QWY8	GO_CC
Cluster5	postsynaptic density	1	72	6	255	0.59	0.867	Q80U72	GO_CC
Cluster5	postsynaptic membrane	1	72	1	255	3.54	0.282	Q80U72	GO_CC
Cluster5	postsynaptic specialization	1	72	6	255	0.59	0.867	Q80U72	GO_CC
Cluster5	primary lysosome	1	72	2	255	1.77	0.486	O88746	GO_CC
Cluster5	protein acetyltransferase complex	2	72	5	255	1.42	0.436	B2RRD7 Q61191	GO_CC
Cluster5	protein kinase complex	1	72	5	255	0.71	0.813	Q6PAM0	GO_CC
Cluster5	protein-containing complex	22	72	117	255	0.67	0.999	B2RRD7 O35691 O54918 O88796 P05627 P33174 P54726 P70399 P81122 P98078 Q04863 Q3TLD5 Q3UYV9 Q5XJE5 Q61165 Q61191 Q6PAM0 Q80U72 Q80WC3 Q8BZ47 Q9D219 Q9QWY8	GO_CC
Cluster5	recycling endosome	2	72	5	255	1.42	0.436	Q3TN34 Q80TM9	GO_CC
Cluster5	replication fork	1	72	3	255	1.18	0.632	P70399	GO_CC
Cluster5	ribonuclease MRP complex	1	72	1	255	3.54	0.282	O88796	GO_CC
Cluster5	ribonuclease P complex	1	72	1	255	3.54	0.282	O88796	GO_CC
Cluster5	ribonucleoprotein complex	3	72	29	255	0.37	0.997	O35691 O88796 Q3UYV9	GO_CC
Cluster5	RNA cap binding complex	1	72	2	255	1.77	0.486	Q3UYV9	GO_CC
Cluster5	RNA polymerase complex	3	72	5	255	2.12	0.138	Q3TLD5 Q5XJE5 Q8BZ47	GO_CC
Cluster5	RNA polymerase II transcription regulator complex	2	72	4	255	1.77	0.317	P05627 Q9D219	GO_CC
Cluster5	RNA polymerase II, core complex	1	72	1	255	3.54	0.282	Q3TLD5	GO_CC
Cluster5	RNA polymerase II, holoenzyme	3	72	4	255	2.66	0.0694	Q3TLD5 Q5XJE5 Q8BZ47	GO_CC
Cluster5	ruffle	2	72	4	255	1.77	0.317	Q5DTX6 Q9QY06	GO_CC
Cluster5	ruffle membrane	1	72	2	255	1.77	0.486	Q5DTX6	GO_CC
Cluster5	sarcolemma	2	72	2	255	3.54	0.0789	Q61165 Q8C8R3	GO_CC
Cluster5	sarcomere	1	72	2	255	1.77	0.486	Q8C8R3	GO_CC
Cluster5	Scrib-APC-beta-catenin complex	1	72	1	255	3.54	0.282	Q80U72	GO_CC
Cluster5	secretory granule	1	72	9	255	0.39	0.952	O88746	GO_CC
Cluster5	secretory granule membrane	1	72	2	255	1.77	0.486	O88746	GO_CC
Cluster5	secretory vesicle	1	72	11	255	0.32	0.976	O88746	GO_CC
Cluster5	Set1C/COMPASS complex	1	72	1	255	3.54	0.282	Q61191	GO_CC
Cluster5	side of membrane	1	72	6	255	0.59	0.867	Q8VBT9	GO_CC
Cluster5	site of DNA damage	1	72	2	255	1.77	0.486	P70399	GO_CC
Cluster5	site of double-strand break	1	72	2	255	1.77	0.486	P70399	GO_CC
Cluster5	site of polarized growth	2	72	4	255	1.77	0.317	Q8R1A4 Q9DBR4	GO_CC
Cluster5	small nucleolar ribonucleoprotein complex	1	72	4	255	0.89	0.737	O88796	GO_CC
Cluster5	somatodendritic compartment	4	72	19	255	0.75	0.838	Q61191 Q8JZN5 Q8K382 Q9QWY8	GO_CC
Cluster5	specific granule	1	72	1	255	3.54	0.282	O88746	GO_CC
Cluster5	specific granule membrane	1	72	1	255	3.54	0.282	O88746	GO_CC
Cluster5	spindle	2	72	8	255	0.89	0.712	O88738 P33174	GO_CC
Cluster5	spindle microtubule	1	72	1	255	3.54	0.282	P33174	GO_CC
Cluster5	spindle pole	1	72	3	255	1.18	0.632	O88738	GO_CC
Cluster5	spliceosomal complex	1	72	13	255	0.27	0.988	O35691	GO_CC
Cluster5	supramolecular complex	5	72	10	255	1.77	0.117	O35691 P33174 Q6NVE8 Q8C8R3 Q9QY06	GO_CC
Cluster5	supramolecular fiber	5	72	10	255	1.77	0.117	O35691 P33174 Q6NVE8 Q8C8R3 Q9QY06	GO_CC
Cluster5	supramolecular polymer	5	72	10	255	1.77	0.117	O35691 P33174 Q6NVE8 Q8C8R3 Q9QY06	GO_CC
Cluster5	synapse	4	72	15	255	0.94	0.655	Q80U72 Q8K382 Q9DBR4 Q9QWY8	GO_CC
Cluster5	synaptic membrane	1	72	1	255	3.54	0.282	Q80U72	GO_CC
Cluster5	T-tubule	2	72	2	255	3.54	0.0789	Q61165 Q8C8R3	GO_CC
Cluster5	tight junction	2	72	5	255	1.42	0.436	Q3TN34 Q6AW69	GO_CC
Cluster5	trans-Golgi network	2	72	5	255	1.42	0.436	O88738 Q6NVE8	GO_CC
Cluster5	transcription elongation factor complex	1	72	2	255	1.77	0.486	Q5XJE5	GO_CC
Cluster5	transcription factor AP-1 complex	1	72	1	255	3.54	0.282	P05627	GO_CC
Cluster5	transcription regulator complex	2	72	7	255	1.01	0.635	P05627 Q9D219	GO_CC
Cluster5	transcription repressor complex	2	72	3	255	2.36	0.193	P05627 Q80WC3	GO_CC
Cluster5	transferase complex	6	72	23	255	0.92	0.677	B2RRD7 Q3TLD5 Q5XJE5 Q61191 Q6PAM0 Q8BZ47	GO_CC
Cluster5	transmembrane transporter complex	1	72	2	255	1.77	0.486	Q61165	GO_CC
Cluster5	transporter complex	1	72	2	255	1.77	0.486	Q61165	GO_CC
Cluster5	vacuolar membrane	2	72	5	255	1.42	0.436	O88746 P98078	GO_CC
Cluster5	vacuole	2	72	8	255	0.89	0.712	O88746 P98078	GO_CC
Cluster5	vesicle	11	72	35	255	1.11	0.394	O70496 O88738 O88746 P98078 Q3TN34 Q6NVE8 Q80TM9 Q8C180 Q8CFD4 Q8K382 Q8VBT9	GO_CC
Cluster5	vesicle membrane	4	72	10	255	1.42	0.302	O88746 P98078 Q8K382 Q8VBT9	GO_CC
Cluster5	whole membrane	7	72	22	255	1.13	0.432	O54918 O88746 P98078 Q61165 Q6NVE8 Q8CFD4 Q8K382	GO_CC
Cluster5	Z disc	1	72	2	255	1.77	0.486	Q8C8R3	GO_CC
Cluster6	acetylcholine-gated channel complex	1	53	1	255	4.81	0.208	Q8K400	GO_CC
Cluster6	acetyltransferase complex	1	53	5	255	0.96	0.691	Q8BRB7	GO_CC
Cluster6	adherens junction	3	53	12	255	1.2	0.471	P63085 Q63844 Q99NH2	GO_CC
Cluster6	alpha DNA polymerase:primase complex	1	53	1	255	4.81	0.208	P33611	GO_CC
Cluster6	anchoring junction	3	53	13	255	1.11	0.531	P63085 Q63844 Q99NH2	GO_CC
Cluster6	annulate lamellae	1	53	1	255	4.81	0.208	Q9ERU9	GO_CC
Cluster6	apical junction complex	2	53	8	255	1.2	0.522	Q8BWW9 Q99NH2	GO_CC
Cluster6	asymmetric synapse	1	53	6	255	0.8	0.757	Q9EQM6	GO_CC
Cluster6	Atg1/ULK1 kinase complex	1	53	1	255	4.81	0.208	Q9ESK9	GO_CC
Cluster6	axon	4	53	10	255	1.92	0.131	P63085 Q63844 Q8R1A4 Q99NH2	GO_CC
Cluster6	axonal growth cone	1	53	1	255	4.81	0.208	Q99NH2	GO_CC
Cluster6	azurophil granule	1	53	2	255	2.41	0.373	P63085	GO_CC
Cluster6	azurophil granule lumen	1	53	1	255	4.81	0.208	P63085	GO_CC
Cluster6	basal part of cell	1	53	2	255	2.41	0.373	Q8R1A4	GO_CC
Cluster6	bicellular tight junction	1	53	5	255	0.96	0.691	Q99NH2	GO_CC
Cluster6	bleb	1	53	1	255	4.81	0.208	Q6P9Q4	GO_CC
Cluster6	bounding membrane of organelle	2	53	18	255	0.53	0.921	G3XA57 Q6PCQ0	GO_CC
Cluster6	box C/D snoRNP complex	1	53	2	255	2.41	0.373	Q9D6Z1	GO_CC
Cluster6	Cajal body	1	53	3	255	1.6	0.504	Q8BTI8	GO_CC
Cluster6	catalytic complex	9	53	42	255	1.03	0.527	P33611 Q5XJE5 Q8BRB7 Q8BTI8 Q99M51 Q9D0L8 Q9EQM6 Q9ESK9 Q9R078	GO_CC
Cluster6	catalytic step 2 spliceosome	1	53	8	255	0.6	0.849	Q8BTI8	GO_CC
Cluster6	caveola	2	53	2	255	4.81	0.0426	P63085 Q63844	GO_CC
Cluster6	Cdc73/Paf1 complex	1	53	2	255	2.41	0.373	Q5XJE5	GO_CC
Cluster6	cell	52	53	253	255	0.99	0.957	A6H8H2 G3XA57 O55098 O88842 P33174 P33611 P63085 Q05D44 Q0KL02 Q14BA6 Q3U214 Q3UHK3 Q3UXZ9 Q5XJE5 Q63844 Q6DID5 Q6NZF1 Q6NZJ6 Q6P9Q4 Q6PAL8 Q6PCQ0 Q6ZPR6 Q6ZPY7 Q6ZPZ3 Q6ZQ12 Q80U35 Q80WQ6 Q8BRB7 Q8BSI6 Q8BTI8 Q8BWW9 Q8C341 Q8K2Z4 Q8K400 Q8K4J6 Q8R0S1 Q8R149 Q8R1A4 Q8R4Z4 Q91XU0 Q924A2 Q99M51 Q99NH2 Q9D0L8 Q9D6Z1 Q9EQM6 Q9ERU9 Q9ESK9 Q9QXL2 Q9R078 Q9R210 Q9WUK4	GO_CC
Cluster6	cell body	3	53	14	255	1.03	0.586	P63085 Q63844 Q99NH2	GO_CC
Cluster6	cell cortex	1	53	5	255	0.96	0.691	Q99NH2	GO_CC
Cluster6	cell division site	1	53	1	255	4.81	0.208	Q8BWW9	GO_CC
Cluster6	cell junction	6	53	23	255	1.26	0.336	P63085 Q63844 Q6P9Q4 Q8BWW9 Q99M51 Q99NH2	GO_CC
Cluster6	cell leading edge	2	53	9	255	1.07	0.591	O88842 Q8BWW9	GO_CC
Cluster6	cell periphery	12	53	64	255	0.9	0.736	A6H8H2 G3XA57 O55098 P63085 Q63844 Q6PCQ0 Q80WQ6 Q8BWW9 Q8K400 Q99M51 Q99NH2 Q9QXL2	GO_CC
Cluster6	cell projection	8	53	34	255	1.13	0.41	O88842 P63085 Q63844 Q6P9Q4 Q6PCQ0 Q8BWW9 Q8R1A4 Q99NH2	GO_CC
Cluster6	cell projection membrane	1	53	4	255	1.2	0.609	Q6PCQ0	GO_CC
Cluster6	cell-cell contact zone	1	53	5	255	0.96	0.691	Q6P9Q4	GO_CC
Cluster6	cell-cell junction	4	53	19	255	1.01	0.585	Q6P9Q4 Q8BWW9 Q99M51 Q99NH2	GO_CC
Cluster6	cell-substrate junction	2	53	4	255	2.41	0.192	P63085 Q63844	GO_CC
Cluster6	centrosome	3	53	11	255	1.31	0.409	Q5XJE5 Q8BWW9 Q9ERU9	GO_CC
Cluster6	chromatin	3	53	12	255	1.2	0.471	Q6ZPY7 Q8BRB7 Q8R4Z4	GO_CC
Cluster6	chromosomal region	1	53	6	255	0.8	0.757	Q8K2Z4	GO_CC
Cluster6	chromosome	7	53	25	255	1.35	0.242	P33174 P33611 Q6ZPY7 Q8BRB7 Q8K2Z4 Q8R4Z4 Q9WUK4	GO_CC
Cluster6	chromosome, centromeric region	1	53	6	255	0.8	0.757	Q8K2Z4	GO_CC
Cluster6	ciliary membrane	1	53	1	255	4.81	0.208	Q6PCQ0	GO_CC
Cluster6	cilium	1	53	6	255	0.8	0.757	Q6PCQ0	GO_CC
Cluster6	cleavage furrow	1	53	1	255	4.81	0.208	Q8BWW9	GO_CC
Cluster6	compact myelin	1	53	1	255	4.81	0.208	Q99NH2	GO_CC
Cluster6	condensed chromosome	1	53	5	255	0.96	0.691	Q8K2Z4	GO_CC
Cluster6	condensed chromosome, centromeric region	1	53	2	255	2.41	0.373	Q8K2Z4	GO_CC
Cluster6	condensed nuclear chromosome	1	53	4	255	1.2	0.609	Q8K2Z4	GO_CC
Cluster6	condensin complex	1	53	1	255	4.81	0.208	Q8K2Z4	GO_CC
Cluster6	condensin core heterodimer	1	53	1	255	4.81	0.208	Q8K2Z4	GO_CC
Cluster6	Ctf18 RFC-like complex	1	53	1	255	4.81	0.208	Q9WUK4	GO_CC
Cluster6	cytoplasm	34	53	190	255	0.86	0.981	A6H8H2 G3XA57 O55098 O88842 P33174 P33611 P63085 Q05D44 Q0KL02 Q14BA6 Q63844 Q6DID5 Q6NZJ6 Q6P9Q4 Q6PAL8 Q6ZPR6 Q6ZPZ3 Q6ZQ12 Q80U35 Q80WQ6 Q8BWW9 Q8C341 Q8K2Z4 Q8K400 Q8K4J6 Q91XU0 Q99M51 Q99NH2 Q9EQM6 Q9ERU9 Q9ESK9 Q9QXL2 Q9R078 Q9R210	GO_CC
Cluster6	cytoplasmic region	3	53	7	255	2.06	0.159	P63085 Q63844 Q99NH2	GO_CC
Cluster6	cytoplasmic vesicle	5	53	33	255	0.73	0.863	A6H8H2 G3XA57 P63085 Q63844 Q8K400	GO_CC
Cluster6	cytoplasmic vesicle lumen	1	53	4	255	1.2	0.609	P63085	GO_CC
Cluster6	cytoplasmic vesicle membrane	1	53	9	255	0.53	0.882	G3XA57	GO_CC
Cluster6	cytoskeleton	9	53	42	255	1.03	0.527	P33174 P63085 Q5XJE5 Q63844 Q6P9Q4 Q8BWW9 Q99NH2 Q9ERU9 Q9QXL2	GO_CC
Cluster6	cytosol	25	53	131	255	0.92	0.8	A6H8H2 O88842 P33174 P33611 P63085 Q05D44 Q0KL02 Q63844 Q6DID5 Q6NZJ6 Q6P9Q4 Q6PAL8 Q6ZPZ3 Q6ZQ12 Q80U35 Q8BWW9 Q8K2Z4 Q8K400 Q8K4J6 Q99M51 Q99NH2 Q9ERU9 Q9ESK9 Q9QXL2 Q9R078	GO_CC
Cluster6	dendrite	2	53	16	255	0.6	0.883	P63085 Q63844	GO_CC
Cluster6	dendrite cytoplasm	2	53	2	255	4.81	0.0426	P63085 Q63844	GO_CC
Cluster6	dendritic tree	2	53	16	255	0.6	0.883	P63085 Q63844	GO_CC
Cluster6	distal axon	2	53	6	255	1.6	0.364	Q8R1A4 Q99NH2	GO_CC
Cluster6	DNA packaging complex	2	53	2	255	4.81	0.0426	Q8BRB7 Q8K2Z4	GO_CC
Cluster6	DNA replication factor C complex	1	53	1	255	4.81	0.208	Q9WUK4	GO_CC
Cluster6	DNA-directed RNA polymerase complex	2	53	5	255	1.92	0.278	P33611 Q5XJE5	GO_CC
Cluster6	early endosome	2	53	7	255	1.37	0.446	P63085 Q63844	GO_CC
Cluster6	endomembrane system	12	53	62	255	0.93	0.686	A6H8H2 G3XA57 O88842 P63085 Q63844 Q6PAL8 Q80WQ6 Q8C341 Q8K400 Q99M51 Q9ERU9 Q9ESK9	GO_CC
Cluster6	endonuclease complex	1	53	4	255	1.2	0.609	Q9EQM6	GO_CC
Cluster6	endoplasmic reticulum	4	53	21	255	0.92	0.672	Q80WQ6 Q8C341 Q99M51 Q9ESK9	GO_CC
Cluster6	endoplasmic reticulum membrane	2	53	10	255	0.96	0.652	Q80WQ6 Q9ESK9	GO_CC
Cluster6	endoplasmic reticulum subcompartment	2	53	10	255	0.96	0.652	Q80WQ6 Q9ESK9	GO_CC
Cluster6	endoribonuclease complex	1	53	4	255	1.2	0.609	Q9EQM6	GO_CC
Cluster6	endosome	3	53	16	255	0.9	0.684	G3XA57 P63085 Q63844	GO_CC
Cluster6	endosome membrane	1	53	5	255	0.96	0.691	G3XA57	GO_CC
Cluster6	envelope	3	53	14	255	1.03	0.586	Q63844 Q9ERU9 Q9ESK9	GO_CC
Cluster6	exon-exon junction complex	1	53	2	255	2.41	0.373	Q8BSI6	GO_CC
Cluster6	extracellular region	3	53	12	255	1.2	0.471	P33174 P63085 Q6ZQ12	GO_CC
Cluster6	extrinsic component of membrane	1	53	5	255	0.96	0.691	Q6PCQ0	GO_CC
Cluster6	fibrillar center	3	53	9	255	1.6	0.281	Q5XJE5 Q9D0L8 Q9D6Z1	GO_CC
Cluster6	ficolin-1-rich granule	1	53	3	255	1.6	0.504	P63085	GO_CC
Cluster6	ficolin-1-rich granule lumen	1	53	2	255	2.41	0.373	P63085	GO_CC
Cluster6	focal adhesion	2	53	4	255	2.41	0.192	P63085 Q63844	GO_CC
Cluster6	Golgi apparatus	5	53	24	255	1	0.586	A6H8H2 O88842 P63085 Q63844 Q6PAL8	GO_CC
Cluster6	Golgi apparatus subcompartment	1	53	8	255	0.6	0.849	Q6PAL8	GO_CC
Cluster6	growth cone	2	53	4	255	2.41	0.192	Q8R1A4 Q99NH2	GO_CC
Cluster6	H3 histone acetyltransferase complex	1	53	3	255	1.6	0.504	Q8BRB7	GO_CC
Cluster6	histone acetyltransferase complex	1	53	4	255	1.2	0.609	Q8BRB7	GO_CC
Cluster6	inclusion body	1	53	1	255	4.81	0.208	Q9ERU9	GO_CC
Cluster6	insulin-responsive compartment	1	53	1	255	4.81	0.208	A6H8H2	GO_CC
Cluster6	integral component of membrane	2	53	16	255	0.6	0.883	Q8K400 Q9ESD6	GO_CC
Cluster6	integral component of plasma membrane	1	53	9	255	0.53	0.882	Q8K400	GO_CC
Cluster6	intercalated disc	1	53	4	255	1.2	0.609	Q6P9Q4	GO_CC
Cluster6	intercellular bridge	2	53	2	255	4.81	0.0426	P33174 Q6ZQ12	GO_CC
Cluster6	intermediate filament cytoskeleton	1	53	3	255	1.6	0.504	Q8BWW9	GO_CC
Cluster6	internode region of axon	1	53	1	255	4.81	0.208	Q99NH2	GO_CC
Cluster6	intracellular	50	53	247	255	0.97	0.939	A6H8H2 G3XA57 O55098 O88842 P33174 P33611 P63085 Q05D44 Q0KL02 Q14BA6 Q3U214 Q3UHK3 Q3UXZ9 Q5XJE5 Q63844 Q6DID5 Q6NZF1 Q6NZJ6 Q6P9Q4 Q6PAL8 Q6ZPR6 Q6ZPY7 Q6ZPZ3 Q6ZQ12 Q80U35 Q80WQ6 Q8BRB7 Q8BSI6 Q8BTI8 Q8BWW9 Q8C341 Q8K2Z4 Q8K400 Q8K4J6 Q8R0S1 Q8R149 Q8R4Z4 Q91XU0 Q924A2 Q99M51 Q99NH2 Q9D0L8 Q9D6Z1 Q9EQM6 Q9ERU9 Q9ESK9 Q9QXL2 Q9R078 Q9R210 Q9WUK4	GO_CC
Cluster6	intracellular membrane-bounded organelle	40	53	191	255	1.01	0.535	A6H8H2 G3XA57 O88842 P33174 P33611 P63085 Q3UHK3 Q3UXZ9 Q5XJE5 Q63844 Q6DID5 Q6NZF1 Q6NZJ6 Q6P9Q4 Q6PAL8 Q6ZPR6 Q6ZPY7 Q6ZPZ3 Q80WQ6 Q8BRB7 Q8BSI6 Q8BTI8 Q8BWW9 Q8C341 Q8K2Z4 Q8K4J6 Q8R0S1 Q8R149 Q8R4Z4 Q91XU0 Q924A2 Q99M51 Q9D0L8 Q9D6Z1 Q9EQM6 Q9ERU9 Q9ESK9 Q9R078 Q9R210 Q9WUK4	GO_CC
Cluster6	intracellular non-membrane-bounded organelle	18	53	87	255	1	0.571	P33174 P33611 P63085 Q5XJE5 Q63844 Q6P9Q4 Q6ZPY7 Q8BRB7 Q8BWW9 Q8K2Z4 Q8R4Z4 Q99M51 Q99NH2 Q9D0L8 Q9D6Z1 Q9ERU9 Q9QXL2 Q9WUK4	GO_CC
Cluster6	intracellular organelle	43	53	220	255	0.94	0.922	A6H8H2 G3XA57 O88842 P33174 P33611 P63085 Q3UHK3 Q3UXZ9 Q5XJE5 Q63844 Q6DID5 Q6NZF1 Q6NZJ6 Q6P9Q4 Q6PAL8 Q6ZPR6 Q6ZPY7 Q6ZPZ3 Q80WQ6 Q8BRB7 Q8BSI6 Q8BTI8 Q8BWW9 Q8C341 Q8K2Z4 Q8K400 Q8K4J6 Q8R0S1 Q8R149 Q8R4Z4 Q91XU0 Q924A2 Q99M51 Q99NH2 Q9D0L8 Q9D6Z1 Q9EQM6 Q9ERU9 Q9ESK9 Q9QXL2 Q9R078 Q9R210 Q9WUK4	GO_CC
Cluster6	intracellular organelle lumen	26	53	134	255	0.93	0.766	G3XA57 P33174 P33611 P63085 Q3UHK3 Q3UXZ9 Q5XJE5 Q63844 Q6NZF1 Q6ZPR6 Q6ZPY7 Q6ZPZ3 Q8BRB7 Q8BTI8 Q8BWW9 Q8K2Z4 Q8K4J6 Q8R0S1 Q8R4Z4 Q924A2 Q9D0L8 Q9D6Z1 Q9EQM6 Q9R078 Q9R210 Q9WUK4	GO_CC
Cluster6	intracellular vesicle	5	53	33	255	0.73	0.863	A6H8H2 G3XA57 P63085 Q63844 Q8K400	GO_CC
Cluster6	intrinsic component of membrane	2	53	16	255	0.6	0.883	Q8K400 Q9ESD6	GO_CC
Cluster6	intrinsic component of plasma membrane	1	53	9	255	0.53	0.882	Q8K400	GO_CC
Cluster6	ion channel complex	1	53	1	255	4.81	0.208	Q8K400	GO_CC
Cluster6	kinesin complex	2	53	2	255	4.81	0.0426	P33174 Q9QXL2	GO_CC
Cluster6	lamellipodium	2	53	6	255	1.6	0.364	O88842 Q8BWW9	GO_CC
Cluster6	late endosome	2	53	3	255	3.21	0.11	P63085 Q63844	GO_CC
Cluster6	lateral loop	1	53	1	255	4.81	0.208	Q99NH2	GO_CC
Cluster6	lysosome	1	53	7	255	0.69	0.809	P63085	GO_CC
Cluster6	lytic vacuole	1	53	7	255	0.69	0.809	P63085	GO_CC
Cluster6	main axon	1	53	2	255	2.41	0.373	Q99NH2	GO_CC
Cluster6	membrane	18	53	96	255	0.9	0.782	A6H8H2 G3XA57 O55098 P63085 Q63844 Q6PAL8 Q6PCQ0 Q6ZPR6 Q80WQ6 Q8BWW9 Q8C341 Q8K400 Q99M51 Q99NH2 Q9ERU9 Q9ESD6 Q9ESK9 Q9QXL2	GO_CC
Cluster6	membrane microdomain	2	53	5	255	1.92	0.278	P63085 Q63844	GO_CC
Cluster6	membrane protein complex	3	53	8	255	1.8	0.218	A6H8H2 Q6PCQ0 Q8K400	GO_CC
Cluster6	membrane raft	2	53	5	255	1.92	0.278	P63085 Q63844	GO_CC
Cluster6	membrane region	3	53	6	255	2.41	0.106	P63085 Q63844 Q9ERU9	GO_CC
Cluster6	membrane-bounded organelle	42	53	202	255	1	0.581	A6H8H2 G3XA57 O88842 P33174 P33611 P63085 Q3UHK3 Q3UXZ9 Q5XJE5 Q63844 Q6DID5 Q6NZF1 Q6NZJ6 Q6P9Q4 Q6PAL8 Q6PCQ0 Q6ZPR6 Q6ZPY7 Q6ZPZ3 Q80WQ6 Q8BRB7 Q8BSI6 Q8BTI8 Q8BWW9 Q8C341 Q8K2Z4 Q8K400 Q8K4J6 Q8R0S1 Q8R149 Q8R4Z4 Q91XU0 Q924A2 Q99M51 Q9D0L8 Q9D6Z1 Q9EQM6 Q9ERU9 Q9ESK9 Q9R078 Q9R210 Q9WUK4	GO_CC
Cluster6	membrane-enclosed lumen	26	53	134	255	0.93	0.766	G3XA57 P33174 P33611 P63085 Q3UHK3 Q3UXZ9 Q5XJE5 Q63844 Q6NZF1 Q6ZPR6 Q6ZPY7 Q6ZPZ3 Q8BRB7 Q8BTI8 Q8BWW9 Q8K2Z4 Q8K4J6 Q8R0S1 Q8R4Z4 Q924A2 Q9D0L8 Q9D6Z1 Q9EQM6 Q9R078 Q9R210 Q9WUK4	GO_CC
Cluster6	methyltransferase complex	1	53	5	255	0.96	0.691	Q9D0L8	GO_CC
Cluster6	microprocessor complex	1	53	1	255	4.81	0.208	Q9EQM6	GO_CC
Cluster6	microtubule	1	53	6	255	0.8	0.757	P33174	GO_CC
Cluster6	microtubule associated complex	2	53	4	255	2.41	0.192	P33174 Q9QXL2	GO_CC
Cluster6	microtubule cytoskeleton	8	53	29	255	1.33	0.232	P33174 P63085 Q5XJE5 Q63844 Q8BWW9 Q99NH2 Q9ERU9 Q9QXL2	GO_CC
Cluster6	microtubule organizing center	3	53	17	255	0.85	0.727	Q5XJE5 Q8BWW9 Q9ERU9	GO_CC
Cluster6	midbody	2	53	4	255	2.41	0.192	P33174 Q8BWW9	GO_CC
Cluster6	mitochondrion	3	53	18	255	0.8	0.765	P63085 Q63844 Q9ERU9	GO_CC
Cluster6	mitotic spindle	2	53	2	255	4.81	0.0426	P63085 Q63844	GO_CC
Cluster6	MOZ/MORF histone acetyltransferase complex	1	53	3	255	1.6	0.504	Q8BRB7	GO_CC
Cluster6	mRNA cap binding complex	1	53	2	255	2.41	0.373	Q9D0L8	GO_CC
Cluster6	mRNA cap methyltransferase complex	1	53	1	255	4.81	0.208	Q9D0L8	GO_CC
Cluster6	myelin sheath	1	53	4	255	1.2	0.609	Q99NH2	GO_CC
Cluster6	neuron projection	4	53	22	255	0.87	0.711	P63085 Q63844 Q8R1A4 Q99NH2	GO_CC
Cluster6	neuron projection cytoplasm	2	53	2	255	4.81	0.0426	P63085 Q63844	GO_CC
Cluster6	neuron to neuron synapse	1	53	6	255	0.8	0.757	Q9EQM6	GO_CC
Cluster6	neuronal cell body	3	53	14	255	1.03	0.586	P63085 Q63844 Q99NH2	GO_CC
Cluster6	non-membrane-bounded organelle	18	53	87	255	1	0.571	P33174 P33611 P63085 Q5XJE5 Q63844 Q6P9Q4 Q6ZPY7 Q8BRB7 Q8BWW9 Q8K2Z4 Q8R4Z4 Q99M51 Q99NH2 Q9D0L8 Q9D6Z1 Q9ERU9 Q9QXL2 Q9WUK4	GO_CC
Cluster6	nuclear body	2	53	38	255	0.25	0.999	Q8BTI8 Q8BWW9	GO_CC
Cluster6	nuclear chromatin	1	53	5	255	0.96	0.691	Q8R4Z4	GO_CC
Cluster6	nuclear chromosome	3	53	11	255	1.31	0.409	P33611 Q8K2Z4 Q8R4Z4	GO_CC
Cluster6	nuclear condensin complex	1	53	1	255	4.81	0.208	Q8K2Z4	GO_CC
Cluster6	nuclear DNA-directed RNA polymerase complex	2	53	5	255	1.92	0.278	P33611 Q5XJE5	GO_CC
Cluster6	nuclear envelope	3	53	10	255	1.44	0.345	Q63844 Q9ERU9 Q9ESK9	GO_CC
Cluster6	nuclear inclusion body	1	53	1	255	4.81	0.208	Q9ERU9	GO_CC
Cluster6	nuclear lumen	26	53	127	255	0.98	0.609	G3XA57 P33174 P33611 P63085 Q3UHK3 Q3UXZ9 Q5XJE5 Q63844 Q6NZF1 Q6ZPR6 Q6ZPY7 Q6ZPZ3 Q8BRB7 Q8BTI8 Q8BWW9 Q8K2Z4 Q8K4J6 Q8R0S1 Q8R4Z4 Q924A2 Q9D0L8 Q9D6Z1 Q9EQM6 Q9R078 Q9R210 Q9WUK4	GO_CC
Cluster6	nuclear matrix	1	53	9	255	0.53	0.882	P33174	GO_CC
Cluster6	nuclear membrane	2	53	8	255	1.2	0.522	Q9ERU9 Q9ESK9	GO_CC
Cluster6	nuclear periphery	2	53	10	255	0.96	0.652	P33174 Q8R0S1	GO_CC
Cluster6	nuclear pore	1	53	1	255	4.81	0.208	Q9ERU9	GO_CC
Cluster6	nuclear pore cytoplasmic filaments	1	53	1	255	4.81	0.208	Q9ERU9	GO_CC
Cluster6	nuclear pore nuclear basket	1	53	1	255	4.81	0.208	Q9ERU9	GO_CC
Cluster6	nuclear replication fork	1	53	1	255	4.81	0.208	P33611	GO_CC
Cluster6	nuclear replisome	1	53	1	255	4.81	0.208	P33611	GO_CC
Cluster6	nuclear speck	1	53	21	255	0.23	0.994	Q8BTI8	GO_CC
Cluster6	nucleolus	3	53	22	255	0.66	0.877	Q5XJE5 Q9D0L8 Q9D6Z1	GO_CC
Cluster6	nucleoplasm	25	53	115	255	1.05	0.425	G3XA57 P33174 P33611 P63085 Q3UHK3 Q3UXZ9 Q5XJE5 Q63844 Q6NZF1 Q6ZPR6 Q6ZPY7 Q6ZPZ3 Q8BRB7 Q8BTI8 Q8BWW9 Q8K2Z4 Q8K4J6 Q8R4Z4 Q924A2 Q9D0L8 Q9D6Z1 Q9EQM6 Q9R078 Q9R210 Q9WUK4	GO_CC
Cluster6	nucleosome	1	53	1	255	4.81	0.208	Q8BRB7	GO_CC
Cluster6	nucleotide-activated protein kinase complex	1	53	2	255	2.41	0.373	Q9R078	GO_CC
Cluster6	nucleus	35	53	165	255	1.02	0.477	G3XA57 P33174 P33611 P63085 Q3UHK3 Q3UXZ9 Q5XJE5 Q63844 Q6DID5 Q6NZF1 Q6NZJ6 Q6P9Q4 Q6ZPR6 Q6ZPY7 Q6ZPZ3 Q8BRB7 Q8BSI6 Q8BTI8 Q8BWW9 Q8K2Z4 Q8K4J6 Q8R0S1 Q8R149 Q8R4Z4 Q91XU0 Q924A2 Q99M51 Q9D0L8 Q9D6Z1 Q9EQM6 Q9ERU9 Q9ESK9 Q9R078 Q9R210 Q9WUK4	GO_CC
Cluster6	organelle	44	53	222	255	0.95	0.886	A6H8H2 G3XA57 O88842 P33174 P33611 P63085 Q3UHK3 Q3UXZ9 Q5XJE5 Q63844 Q6DID5 Q6NZF1 Q6NZJ6 Q6P9Q4 Q6PAL8 Q6PCQ0 Q6ZPR6 Q6ZPY7 Q6ZPZ3 Q80WQ6 Q8BRB7 Q8BSI6 Q8BTI8 Q8BWW9 Q8C341 Q8K2Z4 Q8K400 Q8K4J6 Q8R0S1 Q8R149 Q8R4Z4 Q91XU0 Q924A2 Q99M51 Q99NH2 Q9D0L8 Q9D6Z1 Q9EQM6 Q9ERU9 Q9ESK9 Q9QXL2 Q9R078 Q9R210 Q9WUK4	GO_CC
Cluster6	organelle envelope	3	53	14	255	1.03	0.586	Q63844 Q9ERU9 Q9ESK9	GO_CC
Cluster6	organelle lumen	26	53	134	255	0.93	0.766	G3XA57 P33174 P33611 P63085 Q3UHK3 Q3UXZ9 Q5XJE5 Q63844 Q6NZF1 Q6ZPR6 Q6ZPY7 Q6ZPZ3 Q8BRB7 Q8BTI8 Q8BWW9 Q8K2Z4 Q8K4J6 Q8R0S1 Q8R4Z4 Q924A2 Q9D0L8 Q9D6Z1 Q9EQM6 Q9R078 Q9R210 Q9WUK4	GO_CC
Cluster6	organelle membrane	5	53	32	255	0.75	0.842	G3XA57 Q6PCQ0 Q99M51 Q9ERU9 Q9ESK9	GO_CC
Cluster6	organelle subcompartment	3	53	16	255	0.9	0.684	Q6PAL8 Q80WQ6 Q9ESK9	GO_CC
Cluster6	perikaryon	2	53	3	255	3.21	0.11	P63085 Q63844	GO_CC
Cluster6	perinuclear region of cytoplasm	2	53	17	255	0.57	0.904	Q8BWW9 Q91XU0	GO_CC
Cluster6	phagophore assembly site	1	53	1	255	4.81	0.208	Q9ESK9	GO_CC
Cluster6	phagophore assembly site membrane	1	53	1	255	4.81	0.208	Q9ESK9	GO_CC
Cluster6	phosphatase complex	1	53	1	255	4.81	0.208	Q99M51	GO_CC
Cluster6	plasma membrane	12	53	63	255	0.92	0.711	A6H8H2 G3XA57 O55098 P63085 Q63844 Q6PCQ0 Q80WQ6 Q8BWW9 Q8K400 Q99M51 Q99NH2 Q9QXL2	GO_CC
Cluster6	plasma membrane bounded cell projection	8	53	34	255	1.13	0.41	O88842 P63085 Q63844 Q6P9Q4 Q6PCQ0 Q8BWW9 Q8R1A4 Q99NH2	GO_CC
Cluster6	plasma membrane bounded cell projection cytoplasm	2	53	2	255	4.81	0.0426	P63085 Q63844	GO_CC
Cluster6	plasma membrane protein complex	2	53	4	255	2.41	0.192	Q6PCQ0 Q8K400	GO_CC
Cluster6	plasma membrane raft	2	53	2	255	4.81	0.0426	P63085 Q63844	GO_CC
Cluster6	plasma membrane region	4	53	14	255	1.37	0.327	P63085 Q63844 Q6PCQ0 Q8BWW9	GO_CC
Cluster6	plasma membrane signaling receptor complex	1	53	2	255	2.41	0.373	Q8K400	GO_CC
Cluster6	polymeric cytoskeletal fiber	1	53	8	255	0.6	0.849	P33174	GO_CC
Cluster6	polysome	1	53	3	255	1.6	0.504	Q6NZJ6	GO_CC
Cluster6	postsynapse	1	53	8	255	0.6	0.849	Q9EQM6	GO_CC
Cluster6	postsynaptic density	1	53	6	255	0.8	0.757	Q9EQM6	GO_CC
Cluster6	postsynaptic specialization	1	53	6	255	0.8	0.757	Q9EQM6	GO_CC
Cluster6	pre-snoRNP complex	1	53	1	255	4.81	0.208	Q9D6Z1	GO_CC
Cluster6	preribosome	1	53	2	255	2.41	0.373	Q9D6Z1	GO_CC
Cluster6	primary lysosome	1	53	2	255	2.41	0.373	P63085	GO_CC
Cluster6	pronucleus	1	53	1	255	4.81	0.208	Q8K2Z4	GO_CC
Cluster6	protein acetyltransferase complex	1	53	5	255	0.96	0.691	Q8BRB7	GO_CC
Cluster6	protein kinase complex	2	53	5	255	1.92	0.278	Q9ESK9 Q9R078	GO_CC
Cluster6	protein phosphatase type 1 complex	1	53	1	255	4.81	0.208	Q99M51	GO_CC
Cluster6	protein serine/threonine phosphatase complex	1	53	1	255	4.81	0.208	Q99M51	GO_CC
Cluster6	protein-containing complex	29	53	117	255	1.19	0.0977	A6H8H2 P33174 P33611 P63085 Q3UXZ9 Q5XJE5 Q63844 Q6NZJ6 Q6PCQ0 Q8BRB7 Q8BSI6 Q8BTI8 Q8BWW9 Q8K2Z4 Q8K400 Q8R149 Q8R4Z4 Q924A2 Q99M51 Q99NH2 Q9D0L8 Q9D6Z1 Q9EQM6 Q9ERU9 Q9ESK9 Q9QXL2 Q9R078 Q9R210 Q9WUK4	GO_CC
Cluster6	protein-DNA complex	3	53	3	255	4.81	0.00858	P33611 Q3UXZ9 Q8BRB7	GO_CC
Cluster6	pseudopodium	2	53	2	255	4.81	0.0426	P63085 Q63844	GO_CC
Cluster6	receptor complex	2	53	4	255	2.41	0.192	Q8K400 Q9D0L8	GO_CC
Cluster6	recycling endosome	1	53	5	255	0.96	0.691	G3XA57	GO_CC
Cluster6	recycling endosome membrane	1	53	2	255	2.41	0.373	G3XA57	GO_CC
Cluster6	replication fork	2	53	3	255	3.21	0.11	P33611 Q9WUK4	GO_CC
Cluster6	replisome	1	53	1	255	4.81	0.208	P33611	GO_CC
Cluster6	RES complex	1	53	2	255	2.41	0.373	Q8R149	GO_CC
Cluster6	retromer complex	1	53	1	255	4.81	0.208	A6H8H2	GO_CC
Cluster6	ribonuclease III complex	1	53	1	255	4.81	0.208	Q9EQM6	GO_CC
Cluster6	ribonucleoprotein complex	4	53	29	255	0.66	0.895	Q6NZJ6 Q8BTI8 Q99M51 Q9D6Z1	GO_CC
Cluster6	ribosome	1	53	5	255	0.96	0.691	Q99M51	GO_CC
Cluster6	RNA cap binding complex	1	53	2	255	2.41	0.373	Q9D0L8	GO_CC
Cluster6	RNA polymerase complex	2	53	5	255	1.92	0.278	P33611 Q5XJE5	GO_CC
Cluster6	RNA polymerase II transcription repressor complex	1	53	1	255	4.81	0.208	Q8R4Z4	GO_CC
Cluster6	RNA polymerase II, holoenzyme	1	53	4	255	1.2	0.609	Q5XJE5	GO_CC
Cluster6	rough endoplasmic reticulum	1	53	2	255	2.41	0.373	Q8C341	GO_CC
Cluster6	ruffle	1	53	4	255	1.2	0.609	O88842	GO_CC
Cluster6	Schmidt-Lanterman incisure	1	53	1	255	4.81	0.208	Q99NH2	GO_CC
Cluster6	secretory granule	3	53	9	255	1.6	0.281	A6H8H2 P63085 Q8K400	GO_CC
Cluster6	secretory granule lumen	1	53	3	255	1.6	0.504	P63085	GO_CC
Cluster6	secretory vesicle	3	53	11	255	1.31	0.409	A6H8H2 P63085 Q8K400	GO_CC
Cluster6	serine/threonine protein kinase complex	1	53	2	255	2.41	0.373	Q9ESK9	GO_CC
Cluster6	site of polarized growth	2	53	4	255	2.41	0.192	Q8R1A4 Q99NH2	GO_CC
Cluster6	small nucleolar ribonucleoprotein complex	1	53	4	255	1.2	0.609	Q9D6Z1	GO_CC
Cluster6	small-subunit processome	1	53	1	255	4.81	0.208	Q9D6Z1	GO_CC
Cluster6	somatodendritic compartment	3	53	19	255	0.76	0.798	P63085 Q63844 Q99NH2	GO_CC
Cluster6	spindle	4	53	8	255	2.41	0.0607	P33174 P63085 Q63844 Q99NH2	GO_CC
Cluster6	spindle microtubule	1	53	1	255	4.81	0.208	P33174	GO_CC
Cluster6	spliceosomal complex	1	53	13	255	0.37	0.956	Q8BTI8	GO_CC
Cluster6	supramolecular complex	1	53	10	255	0.48	0.907	P33174	GO_CC
Cluster6	supramolecular fiber	1	53	10	255	0.48	0.907	P33174	GO_CC
Cluster6	supramolecular polymer	1	53	10	255	0.48	0.907	P33174	GO_CC
Cluster6	synapse	1	53	15	255	0.32	0.973	Q9EQM6	GO_CC
Cluster6	tight junction	1	53	5	255	0.96	0.691	Q99NH2	GO_CC
Cluster6	trans-Golgi network	1	53	5	255	0.96	0.691	Q6PAL8	GO_CC
Cluster6	transcription elongation factor complex	1	53	2	255	2.41	0.373	Q5XJE5	GO_CC
Cluster6	transcription regulator complex	1	53	7	255	0.69	0.809	Q9R210	GO_CC
Cluster6	transcription repressor complex	1	53	3	255	1.6	0.504	Q8R4Z4	GO_CC
Cluster6	transferase complex	6	53	23	255	1.26	0.336	P33611 Q5XJE5 Q8BRB7 Q9D0L8 Q9ESK9 Q9R078	GO_CC
Cluster6	transmembrane transporter complex	1	53	2	255	2.41	0.373	Q8K400	GO_CC
Cluster6	transporter complex	1	53	2	255	2.41	0.373	Q8K400	GO_CC
Cluster6	U2-type catalytic step 2 spliceosome	1	53	1	255	4.81	0.208	Q8BTI8	GO_CC
Cluster6	U2-type spliceosomal complex	1	53	3	255	1.6	0.504	Q8BTI8	GO_CC
Cluster6	vacuolar lumen	1	53	1	255	4.81	0.208	P63085	GO_CC
Cluster6	vacuole	1	53	8	255	0.6	0.849	P63085	GO_CC
Cluster6	vesicle	6	53	35	255	0.82	0.783	A6H8H2 G3XA57 P63085 Q63844 Q8K400 Q99M51	GO_CC
Cluster6	vesicle lumen	1	53	4	255	1.2	0.609	P63085	GO_CC
Cluster6	vesicle membrane	2	53	10	255	0.96	0.652	G3XA57 Q99M51	GO_CC
Cluster6	whole membrane	5	53	22	255	1.09	0.498	G3XA57 P63085 Q63844 Q9ERU9 Q9ESK9	GO_CC

## Sheet: GO.MF
Table SV. GO molecular function enrichment analysis by cluster.
Cluster	Terms	Mapping	All.mapping	Background	All.background	Fold.enrich	P-value	Protein.IDs	Type
Cluster1	2-oxoglutarate-dependent dioxygenase activity	1	30	2	214	3.57	0.261	P09103	GO_MF
Cluster1	actinin binding	1	30	2	214	3.57	0.261	Q8K4E0	GO_MF
Cluster1	activating transcription factor binding	1	30	4	214	1.78	0.456	P57776	GO_MF
Cluster1	adenyl nucleotide binding	1	30	10	214	0.71	0.787	Q99MN1	GO_MF
Cluster1	adenyl ribonucleotide binding	1	30	10	214	0.71	0.787	Q99MN1	GO_MF
Cluster1	adenylyltransferase activity	1	30	2	214	3.57	0.261	Q99MN1	GO_MF
Cluster1	alpha-actinin binding	1	30	1	214	7.13	0.14	Q8K4E0	GO_MF
Cluster1	alpha-tubulin binding	1	30	1	214	7.13	0.14	E9Q5F9	GO_MF
Cluster1	amide binding	1	30	4	214	1.78	0.456	A2AR02	GO_MF
Cluster1	amino acid binding	1	30	2	214	3.57	0.261	Q99MN1	GO_MF
Cluster1	aminoacyl-tRNA ligase activity	1	30	1	214	7.13	0.14	Q99MN1	GO_MF
Cluster1	anion binding	2	30	22	214	0.65	0.849	Q8R1Q8 Q99MN1	GO_MF
Cluster1	armadillo repeat domain binding	1	30	1	214	7.13	0.14	O35625	GO_MF
Cluster1	ATP adenylyltransferase activity	1	30	1	214	7.13	0.14	Q99MN1	GO_MF
Cluster1	ATP binding	1	30	10	214	0.71	0.787	Q99MN1	GO_MF
Cluster1	basal transcription machinery binding	1	30	4	214	1.78	0.456	Q8K2T8	GO_MF
Cluster1	beta-catenin binding	1	30	4	214	1.78	0.456	O35625	GO_MF
Cluster1	binding	26	30	184	214	1.01	0.585	A2AR02 E9Q5F9 O08784 O35625 P09103 P09528 P33611 P49717 P57776 P62751 Q0VBL3 Q61083 Q62433 Q6P1G2 Q8BTW9 Q8K1M6 Q8K2T8 Q8K4E0 Q8R0F5 Q8R1Q8 Q924A2 Q99MN1 Q9CR57 Q9R0L6 Q9R1C7 Q9Z0U1	GO_MF
Cluster1	cadherin binding	1	30	1	214	7.13	0.14	Q62433	GO_MF
Cluster1	calmodulin-dependent protein kinase activity	1	30	1	214	7.13	0.14	Q8BWJ3	GO_MF
Cluster1	carbohydrate derivative binding	2	30	13	214	1.1	0.569	Q8R1Q8 Q99MN1	GO_MF
Cluster1	carboxylic acid binding	1	30	2	214	3.57	0.261	Q99MN1	GO_MF
Cluster1	catalytic activity	12	30	68	214	1.26	0.201	A2AR02 E9Q5F9 P09103 P33611 Q61083 Q6P1G2 Q8BTW9 Q8BWJ3 Q8K1M6 Q8R1Q8 Q99MN1 Q9Z0U1	GO_MF
Cluster1	catalytic activity, acting on a protein	7	30	36	214	1.39	0.217	A2AR02 E9Q5F9 P09103 Q61083 Q6P1G2 Q8BTW9 Q8BWJ3	GO_MF
Cluster1	catalytic activity, acting on a tRNA	1	30	2	214	3.57	0.261	Q99MN1	GO_MF
Cluster1	catalytic activity, acting on DNA	1	30	3	214	2.38	0.366	P33611	GO_MF
Cluster1	catalytic activity, acting on RNA	1	30	7	214	1.02	0.658	Q99MN1	GO_MF
Cluster1	cation binding	1	30	11	214	0.65	0.818	P09528	GO_MF
Cluster1	cation transmembrane transporter activity	1	30	4	214	1.78	0.456	Q6P5F6	GO_MF
Cluster1	cell adhesion molecule binding	2	30	7	214	2.04	0.255	P09103 Q62433	GO_MF
Cluster1	chromatin binding	2	30	19	214	0.75	0.781	Q8K2T8 Q924A2	GO_MF
Cluster1	cis-trans isomerase activity	1	30	1	214	7.13	0.14	A2AR02	GO_MF
Cluster1	coreceptor activity	1	30	1	214	7.13	0.14	Q8BKG3	GO_MF
Cluster1	cyclosporin A binding	1	30	1	214	7.13	0.14	A2AR02	GO_MF
Cluster1	cytoskeletal protein binding	4	30	17	214	1.68	0.2	E9Q5F9 Q62433 Q8K1M6 Q8K4E0	GO_MF
Cluster1	demethylase activity	1	30	3	214	2.38	0.366	Q6P1G2	GO_MF
Cluster1	dioxygenase activity	1	30	2	214	3.57	0.261	P09103	GO_MF
Cluster1	disulfide oxidoreductase activity	1	30	1	214	7.13	0.14	P09103	GO_MF
Cluster1	DNA binding	3	30	34	214	0.63	0.895	P49717 P57776 Q6P1G2	GO_MF
Cluster1	DNA polymerase activity	1	30	1	214	7.13	0.14	P33611	GO_MF
Cluster1	DNA-binding transcription factor activity	1	30	30	214	0.24	0.993	Q924A2	GO_MF
Cluster1	DNA-directed DNA polymerase activity	1	30	1	214	7.13	0.14	P33611	GO_MF
Cluster1	double-stranded DNA binding	1	30	19	214	0.38	0.951	Q6P1G2	GO_MF
Cluster1	drug binding	2	30	11	214	1.3	0.473	A2AR02 Q99MN1	GO_MF
Cluster1	dynein heavy chain binding	1	30	1	214	7.13	0.14	Q8R1Q8	GO_MF
Cluster1	enzyme activator activity	2	30	17	214	0.84	0.723	O35625 Q8K1M6	GO_MF
Cluster1	enzyme binding	8	30	78	214	0.73	0.923	O08784 O35625 P09103 Q61083 Q62433 Q8BTW9 Q8K1M6 Q8K2T8	GO_MF
Cluster1	enzyme regulator activity	2	30	25	214	0.57	0.898	O35625 Q8K1M6	GO_MF
Cluster1	gamma-tubulin binding	1	30	1	214	7.13	0.14	Q62433	GO_MF
Cluster1	GDP binding	1	30	2	214	3.57	0.261	Q8R1Q8	GO_MF
Cluster1	GTP-dependent protein binding	1	30	1	214	7.13	0.14	Q8K1M6	GO_MF
Cluster1	GTPase activator activity	2	30	14	214	1.02	0.612	O35625 Q8K1M6	GO_MF
Cluster1	GTPase activity	1	30	4	214	1.78	0.456	Q8K1M6	GO_MF
Cluster1	GTPase binding	3	30	32	214	0.67	0.867	Q62433 Q8BTW9 Q8K1M6	GO_MF
Cluster1	GTPase regulator activity	2	30	14	214	1.02	0.612	O35625 Q8K1M6	GO_MF
Cluster1	guanyl nucleotide binding	1	30	3	214	2.38	0.366	Q8R1Q8	GO_MF
Cluster1	guanyl ribonucleotide binding	1	30	3	214	2.38	0.366	Q8R1Q8	GO_MF
Cluster1	guanylate kinase activity	1	30	2	214	3.57	0.261	Q9Z0U1	GO_MF
Cluster1	heat shock protein binding	1	30	2	214	3.57	0.261	P57776	GO_MF
Cluster1	heterocyclic compound binding	10	30	68	214	1.05	0.498	P49717 P57776 P62751 Q0VBL3 Q6P1G2 Q8R0F5 Q8R1Q8 Q99MN1 Q9CR57 Q9R1C7	GO_MF
Cluster1	histone demethylase activity	1	30	3	214	2.38	0.366	Q6P1G2	GO_MF
Cluster1	histone methyltransferase activity	1	30	1	214	7.13	0.14	E9Q5F9	GO_MF
Cluster1	histone-lysine N-methyltransferase activity	1	30	1	214	7.13	0.14	E9Q5F9	GO_MF
Cluster1	hydrolase activity	2	30	22	214	0.65	0.849	Q8K1M6 Q8R1Q8	GO_MF
Cluster1	hydrolase activity, acting on acid anhydrides	2	30	13	214	1.1	0.569	Q8K1M6 Q8R1Q8	GO_MF
Cluster1	I-SMAD binding	1	30	1	214	7.13	0.14	O35625	GO_MF
Cluster1	identical protein binding	4	30	29	214	0.98	0.609	O35625 Q8K1M6 Q99MN1 Q9R0L6	GO_MF
Cluster1	integrin binding	1	30	5	214	1.43	0.534	P09103	GO_MF
Cluster1	intramolecular oxidoreductase activity	1	30	1	214	7.13	0.14	P09103	GO_MF
Cluster1	ion binding	3	30	29	214	0.74	0.813	P09528 Q8R1Q8 Q99MN1	GO_MF
Cluster1	ion transmembrane transporter activity	1	30	7	214	1.02	0.658	Q6P5F6	GO_MF
Cluster1	iron ion binding	1	30	1	214	7.13	0.14	P09528	GO_MF
Cluster1	isomerase activity	2	30	2	214	7.13	0.0191	A2AR02 P09103	GO_MF
Cluster1	kinase activity	4	30	20	214	1.43	0.301	Q61083 Q8BTW9 Q8BWJ3 Q9Z0U1	GO_MF
Cluster1	kinase binding	2	30	25	214	0.57	0.898	O35625 Q61083	GO_MF
Cluster1	large ribosomal subunit rRNA binding	1	30	1	214	7.13	0.14	P62751	GO_MF
Cluster1	ligase activity	1	30	2	214	3.57	0.261	Q99MN1	GO_MF
Cluster1	ligase activity, forming carbon-oxygen bonds	1	30	1	214	7.13	0.14	Q99MN1	GO_MF
Cluster1	lysine N-methyltransferase activity	1	30	1	214	7.13	0.14	E9Q5F9	GO_MF
Cluster1	lysine-tRNA ligase activity	1	30	1	214	7.13	0.14	Q99MN1	GO_MF
Cluster1	MAP kinase kinase kinase activity	1	30	2	214	3.57	0.261	Q61083	GO_MF
Cluster1	metal ion binding	1	30	11	214	0.65	0.818	P09528	GO_MF
Cluster1	metal ion transmembrane transporter activity	1	30	4	214	1.78	0.456	Q6P5F6	GO_MF
Cluster1	methyltransferase activity	1	30	3	214	2.38	0.366	E9Q5F9	GO_MF
Cluster1	microtubule binding	2	30	6	214	2.38	0.199	Q62433 Q8K1M6	GO_MF
Cluster1	microtubule motor activity	1	30	3	214	2.38	0.366	Q8R1Q8	GO_MF
Cluster1	molecular adaptor activity	2	30	12	214	1.19	0.523	O35625 Q9Z0U1	GO_MF
Cluster1	molecular function regulator	2	30	37	214	0.39	0.982	O35625 Q8K1M6	GO_MF
Cluster1	molecular transducer activity	2	30	6	214	2.38	0.199	Q8BKG3 Q99PL5	GO_MF
Cluster1	motor activity	1	30	4	214	1.78	0.456	Q8R1Q8	GO_MF
Cluster1	mRNA binding	1	30	8	214	0.89	0.708	Q0VBL3	GO_MF
Cluster1	N-methyltransferase activity	1	30	2	214	3.57	0.261	E9Q5F9	GO_MF
Cluster1	nucleic acid binding	9	30	58	214	1.11	0.426	P49717 P57776 P62751 Q0VBL3 Q6P1G2 Q8R0F5 Q99MN1 Q9CR57 Q9R1C7	GO_MF
Cluster1	nucleobase-containing compound kinase activity	1	30	2	214	3.57	0.261	Q9Z0U1	GO_MF
Cluster1	nucleoside binding	1	30	4	214	1.78	0.456	Q8R1Q8	GO_MF
Cluster1	nucleoside monophosphate kinase activity	1	30	2	214	3.57	0.261	Q9Z0U1	GO_MF
Cluster1	nucleoside phosphate binding	2	30	13	214	1.1	0.569	Q8R1Q8 Q99MN1	GO_MF
Cluster1	nucleoside-triphosphatase activity	2	30	13	214	1.1	0.569	Q8K1M6 Q8R1Q8	GO_MF
Cluster1	nucleoside-triphosphatase regulator activity	2	30	14	214	1.02	0.612	O35625 Q8K1M6	GO_MF
Cluster1	nucleotide binding	2	30	13	214	1.1	0.569	Q8R1Q8 Q99MN1	GO_MF
Cluster1	nucleotidyltransferase activity	2	30	4	214	3.57	0.0953	P33611 Q99MN1	GO_MF
Cluster1	organic acid binding	1	30	2	214	3.57	0.261	Q99MN1	GO_MF
Cluster1	organic cyclic compound binding	10	30	69	214	1.03	0.522	P49717 P57776 P62751 Q0VBL3 Q6P1G2 Q8R0F5 Q8R1Q8 Q99MN1 Q9CR57 Q9R1C7	GO_MF
Cluster1	oxidoreductase activity	1	30	4	214	1.78	0.456	P09103	GO_MF
Cluster1	p53 binding	1	30	4	214	1.78	0.456	O35625	GO_MF
Cluster1	peptide binding	1	30	4	214	1.78	0.456	A2AR02	GO_MF
Cluster1	peptide disulfide oxidoreductase activity	1	30	1	214	7.13	0.14	P09103	GO_MF
Cluster1	peptidyl-proline 4-dioxygenase activity	1	30	1	214	7.13	0.14	P09103	GO_MF
Cluster1	peptidyl-proline dioxygenase activity	1	30	1	214	7.13	0.14	P09103	GO_MF
Cluster1	peptidyl-prolyl cis-trans isomerase activity	1	30	1	214	7.13	0.14	A2AR02	GO_MF
Cluster1	phosphorylase kinase activity	1	30	1	214	7.13	0.14	Q8BWJ3	GO_MF
Cluster1	procollagen-proline 4-dioxygenase activity	1	30	1	214	7.13	0.14	P09103	GO_MF
Cluster1	procollagen-proline dioxygenase activity	1	30	1	214	7.13	0.14	P09103	GO_MF
Cluster1	proline-rich region binding	1	30	2	214	3.57	0.261	Q9R1C7	GO_MF
Cluster1	protein binding	17	30	150	214	0.81	0.972	E9Q5F9 O08784 O35625 P09103 P33611 P57776 Q61083 Q62433 Q8BTW9 Q8K1M6 Q8K2T8 Q8K4E0 Q8R1Q8 Q99MN1 Q9R0L6 Q9R1C7 Q9Z0U1	GO_MF
Cluster1	protein C-terminus binding	2	30	7	214	2.04	0.255	O35625 Q9Z0U1	GO_MF
Cluster1	protein dimerization activity	6	30	20	214	2.14	0.0424	O08784 O35625 P09103 P33611 Q8K1M6 Q99MN1	GO_MF
Cluster1	protein disulfide isomerase activity	1	30	1	214	7.13	0.14	P09103	GO_MF
Cluster1	protein domain specific binding	2	30	27	214	0.53	0.923	O35625 Q9Z0U1	GO_MF
Cluster1	protein heterodimerization activity	3	30	13	214	1.65	0.268	O08784 P09103 P33611	GO_MF
Cluster1	protein homodimerization activity	3	30	10	214	2.14	0.151	O35625 Q8K1M6 Q99MN1	GO_MF
Cluster1	protein kinase activity	3	30	16	214	1.34	0.395	Q61083 Q8BTW9 Q8BWJ3	GO_MF
Cluster1	protein kinase binding	2	30	24	214	0.59	0.884	O35625 Q61083	GO_MF
Cluster1	protein methyltransferase activity	1	30	1	214	7.13	0.14	E9Q5F9	GO_MF
Cluster1	protein self-association	1	30	3	214	2.38	0.366	O35625	GO_MF
Cluster1	protein serine/threonine kinase activity	3	30	13	214	1.65	0.268	Q61083 Q8BTW9 Q8BWJ3	GO_MF
Cluster1	protein-containing complex binding	2	30	25	214	0.57	0.898	P09103 Q8K2T8	GO_MF
Cluster1	protein-lysine N-methyltransferase activity	1	30	1	214	7.13	0.14	E9Q5F9	GO_MF
Cluster1	protein-macromolecule adaptor activity	1	30	11	214	0.65	0.818	Q9Z0U1	GO_MF
Cluster1	purine nucleoside binding	1	30	3	214	2.38	0.366	Q8R1Q8	GO_MF
Cluster1	purine nucleotide binding	2	30	13	214	1.1	0.569	Q8R1Q8 Q99MN1	GO_MF
Cluster1	purine ribonucleoside binding	1	30	3	214	2.38	0.366	Q8R1Q8	GO_MF
Cluster1	purine ribonucleoside triphosphate binding	1	30	12	214	0.59	0.845	Q99MN1	GO_MF
Cluster1	purine ribonucleotide binding	2	30	13	214	1.1	0.569	Q8R1Q8 Q99MN1	GO_MF
Cluster1	pyrophosphatase activity	2	30	13	214	1.1	0.569	Q8K1M6 Q8R1Q8	GO_MF
Cluster1	R-SMAD binding	1	30	4	214	1.78	0.456	O35625	GO_MF
Cluster1	Rab GTPase binding	2	30	13	214	1.1	0.569	Q62433 Q8K1M6	GO_MF
Cluster1	Rac GTPase binding	1	30	5	214	1.43	0.534	Q8BTW9	GO_MF
Cluster1	Ras GTPase binding	3	30	30	214	0.71	0.833	Q62433 Q8BTW9 Q8K1M6	GO_MF
Cluster1	regulatory region nucleic acid binding	1	30	22	214	0.32	0.97	Q6P1G2	GO_MF
Cluster1	Rho GTPase binding	1	30	12	214	0.59	0.845	Q8BTW9	GO_MF
Cluster1	ribonucleoside binding	1	30	4	214	1.78	0.456	Q8R1Q8	GO_MF
Cluster1	ribonucleotide binding	2	30	13	214	1.1	0.569	Q8R1Q8 Q99MN1	GO_MF
Cluster1	RNA binding	6	30	26	214	1.65	0.133	P62751 Q0VBL3 Q8R0F5 Q99MN1 Q9CR57 Q9R1C7	GO_MF
Cluster1	RNA polymerase binding	2	30	7	214	2.04	0.255	O08784 Q8K2T8	GO_MF
Cluster1	RNA polymerase core enzyme binding	2	30	6	214	2.38	0.199	O08784 Q8K2T8	GO_MF
Cluster1	RNA polymerase I core binding	1	30	2	214	3.57	0.261	O08784	GO_MF
Cluster1	RNA polymerase II complex binding	1	30	4	214	1.78	0.456	Q8K2T8	GO_MF
Cluster1	rRNA binding	1	30	1	214	7.13	0.14	P62751	GO_MF
Cluster1	scaffold protein binding	2	30	4	214	3.57	0.0953	O08784 Q99MN1	GO_MF
Cluster1	sequence-specific DNA binding	1	30	23	214	0.31	0.975	Q6P1G2	GO_MF
Cluster1	sequence-specific double-stranded DNA binding	1	30	19	214	0.38	0.951	Q6P1G2	GO_MF
Cluster1	signaling adaptor activity	1	30	5	214	1.43	0.534	O35625	GO_MF
Cluster1	signaling receptor activity	2	30	6	214	2.38	0.199	Q8BKG3 Q99PL5	GO_MF
Cluster1	signaling receptor binding	2	30	23	214	0.62	0.868	O35625 P09103	GO_MF
Cluster1	single-stranded DNA binding	1	30	6	214	1.19	0.601	P49717	GO_MF
Cluster1	SMAD binding	1	30	5	214	1.43	0.534	O35625	GO_MF
Cluster1	small GTPase binding	3	30	30	214	0.71	0.833	Q62433 Q8BTW9 Q8K1M6	GO_MF
Cluster1	small molecule binding	2	30	14	214	1.02	0.612	Q8R1Q8 Q99MN1	GO_MF
Cluster1	structural constituent of ribosome	2	30	2	214	7.13	0.0191	P62751 Q9CR57	GO_MF
Cluster1	structural molecule activity	3	30	11	214	1.95	0.188	O35625 P62751 Q9CR57	GO_MF
Cluster1	transcription factor binding	1	30	23	214	0.31	0.975	P57776	GO_MF
Cluster1	transcription regulator activity	1	30	38	214	0.19	0.998	Q924A2	GO_MF
Cluster1	transferase activity	7	30	39	214	1.28	0.29	E9Q5F9 P33611 Q61083 Q8BTW9 Q8BWJ3 Q99MN1 Q9Z0U1	GO_MF
Cluster1	transition metal ion binding	1	30	7	214	1.02	0.658	P09528	GO_MF
Cluster1	transmembrane transporter activity	1	30	7	214	1.02	0.658	Q6P5F6	GO_MF
Cluster1	transporter activity	2	30	9	214	1.59	0.367	O08784 Q6P5F6	GO_MF
Cluster1	tRNA binding	1	30	2	214	3.57	0.261	Q99MN1	GO_MF
Cluster1	tubulin binding	3	30	8	214	2.68	0.0856	E9Q5F9 Q62433 Q8K1M6	GO_MF
Cluster1	ubiquitin protein ligase binding	2	30	5	214	2.85	0.145	O35625 Q8K1M6	GO_MF
Cluster1	ubiquitin-like protein ligase binding	2	30	5	214	2.85	0.145	O35625 Q8K1M6	GO_MF
Cluster1	zinc ion transmembrane transporter activity	1	30	1	214	7.13	0.14	Q6P5F6	GO_MF
Cluster2	1-phosphatidylinositol-3-kinase activity	1	47	3	214	1.52	0.527	Q61851	GO_MF
Cluster2	3'-5' DNA helicase activity	1	47	1	214	4.55	0.22	O70133	GO_MF
Cluster2	3'-5' DNA/RNA helicase activity	1	47	1	214	4.55	0.22	O70133	GO_MF
Cluster2	3'-5' RNA helicase activity	1	47	1	214	4.55	0.22	O70133	GO_MF
Cluster2	acetyltransferase activity	1	47	2	214	2.28	0.392	O09000	GO_MF
Cluster2	adenyl nucleotide binding	2	47	10	214	0.91	0.687	O70133 Q9ES00	GO_MF
Cluster2	adenyl ribonucleotide binding	2	47	10	214	0.91	0.687	O70133 Q9ES00	GO_MF
Cluster2	alcohol binding	1	47	1	214	4.55	0.22	Q9DBS9	GO_MF
Cluster2	androgen receptor binding	1	47	2	214	2.28	0.392	O09000	GO_MF
Cluster2	anion binding	5	47	22	214	1.03	0.555	A2AAY5 O70133 P62821 Q99K70 Q9ES00	GO_MF
Cluster2	anion channel activity	1	47	3	214	1.52	0.527	Q6PB70	GO_MF
Cluster2	anion transmembrane transporter activity	1	47	3	214	1.52	0.527	Q6PB70	GO_MF
Cluster2	antigen binding	1	47	1	214	4.55	0.22	Q9D0E1	GO_MF
Cluster2	ATP binding	2	47	10	214	0.91	0.687	O70133 Q9ES00	GO_MF
Cluster2	ATPase activity	1	47	7	214	0.65	0.829	O70133	GO_MF
Cluster2	ATPase binding	3	47	4	214	3.41	0.034	A2ALK8 P60521 Q9ES00	GO_MF
Cluster2	basal transcription machinery binding	2	47	4	214	2.28	0.21	O09000 O70133	GO_MF
Cluster2	beta-catenin binding	1	47	4	214	1.14	0.632	E9Q9R9	GO_MF
Cluster2	beta-tubulin binding	1	47	1	214	4.55	0.22	P60521	GO_MF
Cluster2	binding	43	47	184	214	1.06	0.16	A2AAY5 A2ALK8 B1AZP2 E9Q9R9 F8VPU2 O08784 O09000 O70133 P11031 P60521 P62821 P97868 Q03172 Q05D44 Q3U5F4 Q3UH06 Q3UYV9 Q569Z6 Q61122 Q61851 Q69Z38 Q6NVE8 Q6P9S1 Q6PD21 Q7TNC4 Q8BTI8 Q8BUR4 Q8BVF2 Q8CJF9 Q8R4Z4 Q8VCD5 Q8VIJ6 Q921R4 Q924A2 Q99K70 Q9D0E1 Q9DBS9 Q9ES00 Q9JKK1 Q9QZQ1 Q9R0L6 Q9Z0F8 Q9Z0U1	GO_MF
Cluster2	C2H2 zinc finger domain binding	1	47	1	214	4.55	0.22	Q8BTI8	GO_MF
Cluster2	calcium-dependent protein binding	1	47	3	214	1.52	0.527	Q9D0E1	GO_MF
Cluster2	carbohydrate derivative binding	4	47	13	214	1.4	0.312	O70133 P62821 Q99K70 Q9ES00	GO_MF
Cluster2	catalytic activity	15	47	68	214	1	0.556	A2ALK8 O09000 O70133 P62821 P97868 Q3U5F4 Q61851 Q69Z38 Q6PGG6 Q8CJF9 Q8VDZ4 Q99K70 Q9ES00 Q9Z0F8 Q9Z0U1	GO_MF
Cluster2	catalytic activity, acting on a protein	6	47	36	214	0.76	0.857	A2ALK8 P97868 Q61851 Q69Z38 Q9ES00 Q9Z0F8	GO_MF
Cluster2	catalytic activity, acting on DNA	1	47	3	214	1.52	0.527	O70133	GO_MF
Cluster2	catalytic activity, acting on RNA	2	47	7	214	1.3	0.479	O70133 Q8CJF9	GO_MF
Cluster2	cation binding	1	47	11	214	0.41	0.939	Q99K70	GO_MF
Cluster2	cell adhesion molecule binding	2	47	7	214	1.3	0.479	Q9QZQ1 Q9Z0F8	GO_MF
Cluster2	channel activity	1	47	5	214	0.91	0.714	Q6PB70	GO_MF
Cluster2	channel regulator activity	1	47	1	214	4.55	0.22	A2ALK8	GO_MF
Cluster2	chloride channel activity	1	47	3	214	1.52	0.527	Q6PB70	GO_MF
Cluster2	chloride transmembrane transporter activity	1	47	3	214	1.52	0.527	Q6PB70	GO_MF
Cluster2	cholesterol binding	1	47	1	214	4.55	0.22	Q9DBS9	GO_MF
Cluster2	chromatin binding	4	47	19	214	0.96	0.636	O09000 O70133 Q8VIJ6 Q924A2	GO_MF
Cluster2	chromatin DNA binding	1	47	4	214	1.14	0.632	O70133	GO_MF
Cluster2	core promoter sequence-specific DNA binding	1	47	2	214	2.28	0.392	Q3UH06	GO_MF
Cluster2	cytokine receptor binding	2	47	4	214	2.28	0.21	Q8BVF2 Q9Z0F8	GO_MF
Cluster2	cytoskeletal protein binding	2	47	17	214	0.54	0.923	E9Q9R9 P60521	GO_MF
Cluster2	DEAD/H-box RNA helicase binding	1	47	1	214	4.55	0.22	Q8R4Z4	GO_MF
Cluster2	disordered domain specific binding	1	47	2	214	2.28	0.392	O09000	GO_MF
Cluster2	DNA binding	9	47	34	214	1.21	0.313	O09000 O70133 P11031 Q03172 Q3UH06 Q569Z6 Q6P9S1 Q8R4Z4 Q8VIJ6	GO_MF
Cluster2	DNA helicase activity	1	47	2	214	2.28	0.392	O70133	GO_MF
Cluster2	DNA replication origin binding	1	47	1	214	4.55	0.22	O70133	GO_MF
Cluster2	DNA-binding transcription factor activity	6	47	30	214	0.91	0.689	O09000 P11031 Q03172 Q3UH06 Q8R4Z4 Q924A2	GO_MF
Cluster2	DNA-dependent ATPase activity	1	47	2	214	2.28	0.392	O70133	GO_MF
Cluster2	DNA/RNA helicase activity	1	47	1	214	4.55	0.22	O70133	GO_MF
Cluster2	dopamine receptor binding	1	47	1	214	4.55	0.22	Q921R4	GO_MF
Cluster2	double-stranded DNA binding	5	47	19	214	1.2	0.408	O70133 Q3UH06 Q569Z6 Q8R4Z4 Q8VIJ6	GO_MF
Cluster2	double-stranded RNA binding	2	47	4	214	2.28	0.21	O70133 Q8CJF9	GO_MF
Cluster2	drug binding	2	47	11	214	0.83	0.74	O70133 Q9ES00	GO_MF
Cluster2	dynein complex binding	1	47	2	214	2.28	0.392	Q6P9S1	GO_MF
Cluster2	E-box binding	1	47	2	214	2.28	0.392	Q8VIJ6	GO_MF
Cluster2	endonuclease activity	1	47	2	214	2.28	0.392	Q8CJF9	GO_MF
Cluster2	endopeptidase activity	1	47	1	214	4.55	0.22	Q9Z0F8	GO_MF
Cluster2	endoribonuclease activity	1	47	2	214	2.28	0.392	Q8CJF9	GO_MF
Cluster2	enzyme activator activity	2	47	17	214	0.54	0.923	A2AAY5 Q8BUR4	GO_MF
Cluster2	enzyme binding	16	47	78	214	0.93	0.71	A2ALK8 F8VPU2 O08784 O09000 O70133 P60521 P97868 Q61851 Q6NVE8 Q7TNC4 Q8BUR4 Q8R4Z4 Q8VIJ6 Q99K70 Q9ES00 Q9QZQ1	GO_MF
Cluster2	enzyme regulator activity	2	47	25	214	0.36	0.988	A2AAY5 Q8BUR4	GO_MF
Cluster2	estrogen receptor binding	1	47	1	214	4.55	0.22	O09000	GO_MF
Cluster2	fibroblast growth factor binding	1	47	1	214	4.55	0.22	Q61851	GO_MF
Cluster2	G protein-coupled receptor binding	1	47	2	214	2.28	0.392	Q921R4	GO_MF
Cluster2	GABA receptor binding	1	47	1	214	4.55	0.22	P60521	GO_MF
Cluster2	gated channel activity	1	47	3	214	1.52	0.527	Q6PB70	GO_MF
Cluster2	GDP binding	1	47	2	214	2.28	0.392	Q99K70	GO_MF
Cluster2	growth factor binding	1	47	2	214	2.28	0.392	Q61851	GO_MF
Cluster2	growth factor receptor binding	2	47	3	214	3.04	0.122	Q8BVF2 Q9Z0F8	GO_MF
Cluster2	GTP binding	2	47	2	214	4.55	0.0474	P62821 Q99K70	GO_MF
Cluster2	GTPase activator activity	1	47	14	214	0.33	0.973	Q8BUR4	GO_MF
Cluster2	GTPase activity	3	47	4	214	3.41	0.034	P62821 Q6PGG6 Q99K70	GO_MF
Cluster2	GTPase binding	6	47	32	214	0.85	0.755	F8VPU2 Q61851 Q6NVE8 Q8BUR4 Q99K70 Q9QZQ1	GO_MF
Cluster2	GTPase regulator activity	1	47	14	214	0.33	0.973	Q8BUR4	GO_MF
Cluster2	guanyl nucleotide binding	2	47	3	214	3.04	0.122	P62821 Q99K70	GO_MF
Cluster2	guanyl ribonucleotide binding	2	47	3	214	3.04	0.122	P62821 Q99K70	GO_MF
Cluster2	guanyl-nucleotide exchange factor activity	3	47	14	214	0.98	0.63	F8VPU2 Q61851 Q8BUR4	GO_MF
Cluster2	guanylate kinase activity	1	47	2	214	2.28	0.392	Q9Z0U1	GO_MF
Cluster2	helicase activity	1	47	4	214	1.14	0.632	O70133	GO_MF
Cluster2	heterocyclic compound binding	18	47	68	214	1.21	0.181	O09000 O70133 P11031 P62821 Q03172 Q05D44 Q3U5F4 Q3UH06 Q3UYV9 Q569Z6 Q6P9S1 Q7TNC4 Q8CJF9 Q8R4Z4 Q8VIJ6 Q99K70 Q9D0E1 Q9ES00	GO_MF
Cluster2	histone acetyltransferase activity	1	47	2	214	2.28	0.392	O09000	GO_MF
Cluster2	histone deacetylase binding	1	47	3	214	1.52	0.527	Q8VIJ6	GO_MF
Cluster2	HMG box domain binding	1	47	2	214	2.28	0.392	Q03172	GO_MF
Cluster2	hormone receptor binding	3	47	4	214	3.41	0.034	O09000 Q569Z6 Q8VCD5	GO_MF
Cluster2	hydrolase activity	7	47	22	214	1.45	0.18	A2ALK8 O70133 P62821 Q6PGG6 Q8CJF9 Q99K70 Q9Z0F8	GO_MF
Cluster2	hydrolase activity, acting on acid anhydrides	4	47	13	214	1.4	0.312	O70133 P62821 Q6PGG6 Q99K70	GO_MF
Cluster2	hydrolase activity, acting on ester bonds	2	47	5	214	1.82	0.303	A2ALK8 Q8CJF9	GO_MF
Cluster2	identical protein binding	5	47	29	214	0.79	0.815	P11031 Q61851 Q69Z38 Q8VIJ6 Q9R0L6	GO_MF
Cluster2	importin-alpha family protein binding	1	47	1	214	4.55	0.22	O70133	GO_MF
Cluster2	inorganic anion transmembrane transporter activity	1	47	3	214	1.52	0.527	Q6PB70	GO_MF
Cluster2	integrin binding	1	47	5	214	0.91	0.714	Q9Z0F8	GO_MF
Cluster2	interleukin-6 receptor binding	1	47	1	214	4.55	0.22	Q9Z0F8	GO_MF
Cluster2	intracellular chloride channel activity	1	47	1	214	4.55	0.22	Q6PB70	GO_MF
Cluster2	ion binding	5	47	29	214	0.79	0.815	A2AAY5 O70133 P62821 Q99K70 Q9ES00	GO_MF
Cluster2	ion channel activity	1	47	5	214	0.91	0.714	Q6PB70	GO_MF
Cluster2	ion gated channel activity	1	47	3	214	1.52	0.527	Q6PB70	GO_MF
Cluster2	ion transmembrane transporter activity	1	47	7	214	0.65	0.829	Q6PB70	GO_MF
Cluster2	kinase activity	3	47	20	214	0.68	0.861	Q61851 Q69Z38 Q9Z0U1	GO_MF
Cluster2	kinase binding	1	47	25	214	0.18	0.999	P97868	GO_MF
Cluster2	LIM domain binding	1	47	1	214	4.55	0.22	Q9QZQ1	GO_MF
Cluster2	lipid binding	2	47	10	214	0.91	0.687	A2AAY5 Q9DBS9	GO_MF
Cluster2	lipid transporter activity	1	47	1	214	4.55	0.22	Q9DBS9	GO_MF
Cluster2	magnesium ion binding	1	47	1	214	4.55	0.22	Q99K70	GO_MF
Cluster2	metal ion binding	1	47	11	214	0.41	0.939	Q99K70	GO_MF
Cluster2	metalloendopeptidase activity	1	47	1	214	4.55	0.22	Q9Z0F8	GO_MF
Cluster2	metallopeptidase activity	1	47	1	214	4.55	0.22	Q9Z0F8	GO_MF
Cluster2	microtubule binding	1	47	6	214	0.76	0.779	P60521	GO_MF
Cluster2	miRNA binding	1	47	1	214	4.55	0.22	Q8CJF9	GO_MF
Cluster2	molecular adaptor activity	2	47	12	214	0.76	0.785	Q6PD21 Q9Z0U1	GO_MF
Cluster2	molecular function regulator	5	47	37	214	0.62	0.949	A2AAY5 A2ALK8 F8VPU2 Q61851 Q8BUR4	GO_MF
Cluster2	molecular transducer activity	3	47	6	214	2.28	0.121	Q569Z6 Q61851 Q8VCD5	GO_MF
Cluster2	mRNA binding	3	47	8	214	1.71	0.245	O70133 Q3UYV9 Q7TNC4	GO_MF
Cluster2	N-acetyltransferase activity	1	47	2	214	2.28	0.392	O09000	GO_MF
Cluster2	N-acyltransferase activity	1	47	2	214	2.28	0.392	O09000	GO_MF
Cluster2	Notch binding	1	47	1	214	4.55	0.22	Q9Z0F8	GO_MF
Cluster2	nuclear hormone receptor binding	3	47	4	214	3.41	0.034	O09000 Q569Z6 Q8VCD5	GO_MF
Cluster2	nuclear receptor binding	1	47	1	214	4.55	0.22	O09000	GO_MF
Cluster2	nuclease activity	1	47	2	214	2.28	0.392	Q8CJF9	GO_MF
Cluster2	nucleic acid binding	15	47	58	214	1.18	0.254	O09000 O70133 P11031 Q03172 Q05D44 Q3U5F4 Q3UH06 Q3UYV9 Q569Z6 Q6P9S1 Q7TNC4 Q8CJF9 Q8R4Z4 Q8VIJ6 Q9D0E1	GO_MF
Cluster2	nucleobase-containing compound kinase activity	1	47	2	214	2.28	0.392	Q9Z0U1	GO_MF
Cluster2	nucleoside binding	2	47	4	214	2.28	0.21	P62821 Q99K70	GO_MF
Cluster2	nucleoside monophosphate kinase activity	1	47	2	214	2.28	0.392	Q9Z0U1	GO_MF
Cluster2	nucleoside phosphate binding	4	47	13	214	1.4	0.312	O70133 P62821 Q99K70 Q9ES00	GO_MF
Cluster2	nucleoside-triphosphatase activity	4	47	13	214	1.4	0.312	O70133 P62821 Q6PGG6 Q99K70	GO_MF
Cluster2	nucleoside-triphosphatase regulator activity	1	47	14	214	0.33	0.973	Q8BUR4	GO_MF
Cluster2	nucleoside-triphosphate diphosphatase activity	1	47	1	214	4.55	0.22	O70133	GO_MF
Cluster2	nucleotide binding	4	47	13	214	1.4	0.312	O70133 P62821 Q99K70 Q9ES00	GO_MF
Cluster2	nucleotidyltransferase activity	1	47	4	214	1.14	0.632	Q3U5F4	GO_MF
Cluster2	organic cyclic compound binding	19	47	69	214	1.25	0.119	O09000 O70133 P11031 P62821 Q03172 Q05D44 Q3U5F4 Q3UH06 Q3UYV9 Q569Z6 Q6P9S1 Q7TNC4 Q8CJF9 Q8R4Z4 Q8VIJ6 Q99K70 Q9D0E1 Q9DBS9 Q9ES00	GO_MF
Cluster2	palmitoyltransferase activity	1	47	1	214	4.55	0.22	Q8VDZ4	GO_MF
Cluster2	passive transmembrane transporter activity	1	47	5	214	0.91	0.714	Q6PB70	GO_MF
Cluster2	PDZ domain binding	1	47	2	214	2.28	0.392	Q9Z0F8	GO_MF
Cluster2	peptidase activity	1	47	2	214	2.28	0.392	Q9Z0F8	GO_MF
Cluster2	peptide N-acetyltransferase activity	1	47	2	214	2.28	0.392	O09000	GO_MF
Cluster2	peptide-lysine-N-acetyltransferase activity	1	47	2	214	2.28	0.392	O09000	GO_MF
Cluster2	peroxisome proliferator activated receptor binding	1	47	2	214	2.28	0.392	O09000	GO_MF
Cluster2	phosphatase activity	1	47	2	214	2.28	0.392	A2ALK8	GO_MF
Cluster2	phosphatidylinositol 3-kinase activity	1	47	3	214	1.52	0.527	Q61851	GO_MF
Cluster2	phosphatidylinositol binding	1	47	7	214	0.65	0.829	A2AAY5	GO_MF
Cluster2	phosphatidylinositol bisphosphate binding	1	47	5	214	0.91	0.714	A2AAY5	GO_MF
Cluster2	phosphatidylinositol bisphosphate kinase activity	1	47	3	214	1.52	0.527	Q61851	GO_MF
Cluster2	phosphatidylinositol kinase activity	1	47	3	214	1.52	0.527	Q61851	GO_MF
Cluster2	phosphatidylinositol phosphate binding	1	47	6	214	0.76	0.779	A2AAY5	GO_MF
Cluster2	phosphatidylinositol-3-phosphate binding	1	47	4	214	1.14	0.632	A2AAY5	GO_MF
Cluster2	phosphatidylinositol-3,5-bisphosphate binding	1	47	1	214	4.55	0.22	A2AAY5	GO_MF
Cluster2	phosphatidylinositol-4-phosphate binding	1	47	1	214	4.55	0.22	A2AAY5	GO_MF
Cluster2	phosphatidylinositol-5-phosphate binding	1	47	1	214	4.55	0.22	A2AAY5	GO_MF
Cluster2	phospholipid binding	1	47	9	214	0.51	0.898	A2AAY5	GO_MF
Cluster2	phosphoprotein binding	3	47	8	214	1.71	0.245	A2ALK8 Q569Z6 Q6PD21	GO_MF
Cluster2	phosphoprotein phosphatase activity	1	47	2	214	2.28	0.392	A2ALK8	GO_MF
Cluster2	phosphoric ester hydrolase activity	1	47	2	214	2.28	0.392	A2ALK8	GO_MF
Cluster2	phosphotyrosine residue binding	2	47	4	214	2.28	0.21	A2ALK8 Q6PD21	GO_MF
Cluster2	polysome binding	1	47	1	214	4.55	0.22	O70133	GO_MF
Cluster2	promoter-specific chromatin binding	1	47	2	214	2.28	0.392	O70133	GO_MF
Cluster2	protein antigen binding	1	47	1	214	4.55	0.22	Q9D0E1	GO_MF
Cluster2	protein binding	34	47	150	214	1.03	0.426	A2AAY5 A2ALK8 B1AZP2 E9Q9R9 F8VPU2 O08784 O09000 O70133 P11031 P60521 P97868 Q03172 Q569Z6 Q61122 Q61851 Q69Z38 Q6NVE8 Q6PD21 Q7TNC4 Q8BTI8 Q8BUR4 Q8BVF2 Q8R4Z4 Q8VCD5 Q8VIJ6 Q921R4 Q99K70 Q9D0E1 Q9ES00 Q9JKK1 Q9QZQ1 Q9R0L6 Q9Z0F8 Q9Z0U1	GO_MF
Cluster2	protein C-terminus binding	2	47	7	214	1.3	0.479	Q9QZQ1 Q9Z0U1	GO_MF
Cluster2	protein dimerization activity	4	47	20	214	0.91	0.681	O08784 O09000 Q8VIJ6 Q99K70	GO_MF
Cluster2	protein domain specific binding	9	47	27	214	1.52	0.103	A2AAY5 B1AZP2 O09000 Q03172 Q8BTI8 Q9D0E1 Q9QZQ1 Q9Z0F8 Q9Z0U1	GO_MF
Cluster2	protein folding chaperone	1	47	1	214	4.55	0.22	Q8BVF2	GO_MF
Cluster2	protein heterodimerization activity	3	47	13	214	1.05	0.574	O08784 O09000 Q99K70	GO_MF
Cluster2	protein homodimerization activity	1	47	10	214	0.46	0.921	Q8VIJ6	GO_MF
Cluster2	protein kinase activity	2	47	16	214	0.57	0.905	Q61851 Q69Z38	GO_MF
Cluster2	protein kinase binding	1	47	24	214	0.19	0.998	P97868	GO_MF
Cluster2	protein N-terminus binding	2	47	3	214	3.04	0.122	O09000 Q8BTI8	GO_MF
Cluster2	protein phosphorylated amino acid binding	2	47	5	214	1.82	0.303	A2ALK8 Q6PD21	GO_MF
Cluster2	protein tyrosine kinase activity	2	47	2	214	4.55	0.0474	Q61851 Q69Z38	GO_MF
Cluster2	protein tyrosine phosphatase activity	1	47	2	214	2.28	0.392	A2ALK8	GO_MF
Cluster2	protein-containing complex binding	4	47	25	214	0.73	0.848	O09000 O70133 Q6P9S1 Q9Z0F8	GO_MF
Cluster2	protein-macromolecule adaptor activity	2	47	11	214	0.83	0.74	Q6PD21 Q9Z0U1	GO_MF
Cluster2	purine nucleoside binding	2	47	3	214	3.04	0.122	P62821 Q99K70	GO_MF
Cluster2	purine nucleotide binding	4	47	13	214	1.4	0.312	O70133 P62821 Q99K70 Q9ES00	GO_MF
Cluster2	purine ribonucleoside binding	2	47	3	214	3.04	0.122	P62821 Q99K70	GO_MF
Cluster2	purine ribonucleoside triphosphate binding	4	47	12	214	1.52	0.256	O70133 P62821 Q99K70 Q9ES00	GO_MF
Cluster2	purine ribonucleotide binding	4	47	13	214	1.4	0.312	O70133 P62821 Q99K70 Q9ES00	GO_MF
Cluster2	pyrophosphatase activity	4	47	13	214	1.4	0.312	O70133 P62821 Q6PGG6 Q99K70	GO_MF
Cluster2	Rab GTPase binding	1	47	13	214	0.35	0.964	Q6NVE8	GO_MF
Cluster2	Rac GTPase binding	1	47	5	214	0.91	0.714	F8VPU2	GO_MF
Cluster2	Rac guanyl-nucleotide exchange factor activity	1	47	2	214	2.28	0.392	F8VPU2	GO_MF
Cluster2	Ras GTPase binding	5	47	30	214	0.76	0.84	F8VPU2 Q61851 Q6NVE8 Q8BUR4 Q9QZQ1	GO_MF
Cluster2	Ras guanyl-nucleotide exchange factor activity	3	47	14	214	0.98	0.63	F8VPU2 Q61851 Q8BUR4	GO_MF
Cluster2	regulatory region nucleic acid binding	8	47	22	214	1.66	0.078	O09000 O70133 Q03172 Q3UH06 Q569Z6 Q6P9S1 Q8R4Z4 Q8VIJ6	GO_MF
Cluster2	regulatory region RNA binding	1	47	1	214	4.55	0.22	O70133	GO_MF
Cluster2	regulatory RNA binding	2	47	2	214	4.55	0.0474	O70133 Q8CJF9	GO_MF
Cluster2	Rho GTPase binding	2	47	12	214	0.76	0.785	F8VPU2 Q8BUR4	GO_MF
Cluster2	Rho guanyl-nucleotide exchange factor activity	2	47	7	214	1.3	0.479	F8VPU2 Q8BUR4	GO_MF
Cluster2	ribonuclease activity	1	47	2	214	2.28	0.392	Q8CJF9	GO_MF
Cluster2	ribonucleoprotein complex binding	1	47	4	214	1.14	0.632	O70133	GO_MF
Cluster2	ribonucleoside binding	2	47	4	214	2.28	0.21	P62821 Q99K70	GO_MF
Cluster2	ribonucleotide binding	4	47	13	214	1.4	0.312	O70133 P62821 Q99K70 Q9ES00	GO_MF
Cluster2	RISC complex binding	1	47	1	214	4.55	0.22	O70133	GO_MF
Cluster2	RNA 7-methylguanosine cap binding	1	47	1	214	4.55	0.22	Q3UYV9	GO_MF
Cluster2	RNA binding	7	47	26	214	1.23	0.334	O70133 Q05D44 Q3U5F4 Q3UYV9 Q7TNC4 Q8CJF9 Q9D0E1	GO_MF
Cluster2	RNA cap binding	1	47	1	214	4.55	0.22	Q3UYV9	GO_MF
Cluster2	RNA helicase activity	1	47	2	214	2.28	0.392	O70133	GO_MF
Cluster2	RNA polymerase binding	3	47	7	214	1.95	0.18	O08784 O09000 O70133	GO_MF
Cluster2	RNA polymerase core enzyme binding	3	47	6	214	2.28	0.121	O08784 O09000 O70133	GO_MF
Cluster2	RNA polymerase I core binding	1	47	2	214	2.28	0.392	O08784	GO_MF
Cluster2	RNA polymerase II complex binding	2	47	4	214	2.28	0.21	O09000 O70133	GO_MF
Cluster2	RNA polymerase II transcription factor binding	1	47	4	214	1.14	0.632	O70133	GO_MF
Cluster2	RNA stem-loop binding	1	47	1	214	4.55	0.22	O70133	GO_MF
Cluster2	RNA-dependent ATPase activity	1	47	2	214	2.28	0.392	O70133	GO_MF
Cluster2	scaffold protein binding	1	47	4	214	1.14	0.632	O08784	GO_MF
Cluster2	sequence-specific DNA binding	6	47	23	214	1.19	0.391	O70133 Q03172 Q3UH06 Q569Z6 Q8R4Z4 Q8VIJ6	GO_MF
Cluster2	sequence-specific double-stranded DNA binding	5	47	19	214	1.2	0.408	O70133 Q3UH06 Q569Z6 Q8R4Z4 Q8VIJ6	GO_MF
Cluster2	sequence-specific mRNA binding	1	47	1	214	4.55	0.22	O70133	GO_MF
Cluster2	serine hydrolase activity	1	47	1	214	4.55	0.22	Q9Z0F8	GO_MF
Cluster2	serine-type endopeptidase activity	1	47	1	214	4.55	0.22	Q9Z0F8	GO_MF
Cluster2	serine-type peptidase activity	1	47	1	214	4.55	0.22	Q9Z0F8	GO_MF
Cluster2	SH2 domain binding	1	47	1	214	4.55	0.22	A2AAY5	GO_MF
Cluster2	signaling adaptor activity	1	47	5	214	0.91	0.714	Q6PD21	GO_MF
Cluster2	signaling receptor activity	3	47	6	214	2.28	0.121	Q569Z6 Q61851 Q8VCD5	GO_MF
Cluster2	signaling receptor binding	7	47	23	214	1.39	0.215	O09000 P60521 Q569Z6 Q8BVF2 Q8VCD5 Q921R4 Q9Z0F8	GO_MF
Cluster2	signaling receptor complex adaptor activity	1	47	2	214	2.28	0.392	E9Q9R9	GO_MF
Cluster2	single-stranded 3'-5' DNA helicase activity	1	47	1	214	4.55	0.22	O70133	GO_MF
Cluster2	single-stranded DNA binding	2	47	6	214	1.52	0.393	O70133 P11031	GO_MF
Cluster2	single-stranded DNA helicase activity	1	47	1	214	4.55	0.22	O70133	GO_MF
Cluster2	single-stranded RNA binding	2	47	3	214	3.04	0.122	O70133 Q8CJF9	GO_MF
Cluster2	siRNA binding	1	47	1	214	4.55	0.22	O70133	GO_MF
Cluster2	small GTPase binding	5	47	30	214	0.76	0.84	F8VPU2 Q61851 Q6NVE8 Q8BUR4 Q9QZQ1	GO_MF
Cluster2	small molecule binding	5	47	14	214	1.63	0.169	O70133 P62821 Q99K70 Q9DBS9 Q9ES00	GO_MF
Cluster2	SNAP receptor activity	1	47	1	214	4.55	0.22	Q9JKK1	GO_MF
Cluster2	SNARE binding	2	47	4	214	2.28	0.21	P60521 Q9JKK1	GO_MF
Cluster2	sodium channel regulator activity	1	47	1	214	4.55	0.22	A2ALK8	GO_MF
Cluster2	steroid binding	1	47	1	214	4.55	0.22	Q9DBS9	GO_MF
Cluster2	steroid hormone receptor binding	1	47	2	214	2.28	0.392	O09000	GO_MF
Cluster2	sterol binding	1	47	1	214	4.55	0.22	Q9DBS9	GO_MF
Cluster2	sterol transporter activity	1	47	1	214	4.55	0.22	Q9DBS9	GO_MF
Cluster2	structural molecule activity	2	47	11	214	0.83	0.74	A2AJI0 E9Q9R9	GO_MF
Cluster2	syntaxin binding	1	47	3	214	1.52	0.527	Q9JKK1	GO_MF
Cluster2	thyroid hormone receptor binding	3	47	3	214	4.55	0.0101	O09000 Q569Z6 Q8VCD5	GO_MF
Cluster2	transcription coactivator activity	5	47	11	214	2.07	0.0666	O09000 O70133 P11031 Q569Z6 Q8VCD5	GO_MF
Cluster2	transcription coregulator activity	5	47	19	214	1.2	0.408	O09000 O70133 P11031 Q569Z6 Q8VCD5	GO_MF
Cluster2	transcription factor binding	5	47	23	214	0.99	0.601	O09000 O70133 Q569Z6 Q61122 Q8VCD5	GO_MF
Cluster2	transcription regulator activity	9	47	38	214	1.08	0.463	O09000 O70133 P11031 Q03172 Q3UH06 Q569Z6 Q8R4Z4 Q8VCD5 Q924A2	GO_MF
Cluster2	transferase activity	8	47	39	214	0.93	0.668	O09000 P97868 Q3U5F4 Q61851 Q69Z38 Q8VDZ4 Q9ES00 Q9Z0U1	GO_MF
Cluster2	transferase activity, transferring acyl groups	2	47	3	214	3.04	0.122	O09000 Q8VDZ4	GO_MF
Cluster2	translation factor activity, RNA binding	1	47	3	214	1.52	0.527	Q05D44	GO_MF
Cluster2	translation initiation factor activity	1	47	3	214	1.52	0.527	Q05D44	GO_MF
Cluster2	transmembrane receptor protein kinase activity	1	47	1	214	4.55	0.22	Q61851	GO_MF
Cluster2	transmembrane signaling receptor activity	1	47	2	214	2.28	0.392	Q61851	GO_MF
Cluster2	transmembrane transporter activity	1	47	7	214	0.65	0.829	Q6PB70	GO_MF
Cluster2	transporter activity	3	47	9	214	1.52	0.313	O08784 Q6PB70 Q9DBS9	GO_MF
Cluster2	triplex DNA binding	1	47	1	214	4.55	0.22	O70133	GO_MF
Cluster2	tRNA binding	1	47	2	214	2.28	0.392	Q3U5F4	GO_MF
Cluster2	tubulin binding	1	47	8	214	0.57	0.868	P60521	GO_MF
Cluster2	ubiquitin protein ligase activity	2	47	3	214	3.04	0.122	P97868 Q9ES00	GO_MF
Cluster2	ubiquitin protein ligase binding	1	47	5	214	0.91	0.714	P60521	GO_MF
Cluster2	ubiquitin-like protein ligase activity	2	47	3	214	3.04	0.122	P97868 Q9ES00	GO_MF
Cluster2	ubiquitin-like protein ligase binding	1	47	5	214	0.91	0.714	P60521	GO_MF
Cluster2	ubiquitin-like protein transferase activity	2	47	9	214	1.01	0.626	P97868 Q9ES00	GO_MF
Cluster2	ubiquitin-protein transferase activity	2	47	7	214	1.3	0.479	P97868 Q9ES00	GO_MF
Cluster2	ubiquitin-ubiquitin ligase activity	1	47	1	214	4.55	0.22	Q9ES00	GO_MF
Cluster2	unfolded protein binding	1	47	1	214	4.55	0.22	Q9ES00	GO_MF
Cluster2	vitamin D receptor binding	1	47	1	214	4.55	0.22	Q8VCD5	GO_MF
Cluster3	actin binding	1	31	6	214	1.15	0.614	P45591	GO_MF
Cluster3	actin filament binding	1	31	3	214	2.3	0.376	P45591	GO_MF
Cluster3	adenyl nucleotide binding	1	31	10	214	0.69	0.798	B2RQC6	GO_MF
Cluster3	adenyl ribonucleotide binding	1	31	10	214	0.69	0.798	B2RQC6	GO_MF
Cluster3	amino acid binding	1	31	2	214	3.45	0.269	B2RQC6	GO_MF
Cluster3	anion binding	3	31	22	214	0.94	0.65	B2RQC6 P47713 Q91YM2	GO_MF
Cluster3	aspartate binding	1	31	1	214	6.9	0.145	B2RQC6	GO_MF
Cluster3	aspartate carbamoyltransferase activity	1	31	1	214	6.9	0.145	B2RQC6	GO_MF
Cluster3	ATP binding	1	31	10	214	0.69	0.798	B2RQC6	GO_MF
Cluster3	ATPase activity	1	31	7	214	0.99	0.671	P40201	GO_MF
Cluster3	BAT3 complex binding	1	31	1	214	6.9	0.145	Q8BJU0	GO_MF
Cluster3	bHLH transcription factor binding	1	31	1	214	6.9	0.145	Q9CR00	GO_MF
Cluster3	binding	29	31	184	214	1.09	0.15	B2RQC6 G5E8P1 P40201 P45591 P47713 P62960 P97868 Q06180 Q3UHX2 Q60875 Q61033 Q64364 Q6PDM2 Q6TXD4 Q6Y7W8 Q80U28 Q80W88 Q8BJU0 Q8BTI8 Q8BYJ6 Q91YM2 Q923D5 Q99KD5 Q9CR00 Q9ERU9 Q9JK23 Q9R0L6 Q9R210 Q9Z1B8	GO_MF
Cluster3	C2H2 zinc finger domain binding	1	31	1	214	6.9	0.145	Q8BTI8	GO_MF
Cluster3	calcium ion binding	1	31	2	214	3.45	0.269	P47713	GO_MF
Cluster3	calcium-dependent phospholipase A2 activity	1	31	1	214	6.9	0.145	P47713	GO_MF
Cluster3	calcium-dependent phospholipid binding	1	31	1	214	6.9	0.145	P47713	GO_MF
Cluster3	carbamoyl-phosphate synthase (ammonia) activity	1	31	1	214	6.9	0.145	B2RQC6	GO_MF
Cluster3	carbohydrate derivative binding	1	31	13	214	0.53	0.877	B2RQC6	GO_MF
Cluster3	carboxyl- or carbamoyltransferase activity	1	31	1	214	6.9	0.145	B2RQC6	GO_MF
Cluster3	carboxylic acid binding	1	31	2	214	3.45	0.269	B2RQC6	GO_MF
Cluster3	carboxylic ester hydrolase activity	1	31	1	214	6.9	0.145	P47713	GO_MF
Cluster3	catalytic activity	7	31	68	214	0.71	0.922	B2RQC6 P40201 P47713 P97868 Q06180 Q64364 Q9ERU9	GO_MF
Cluster3	catalytic activity, acting on a protein	5	31	36	214	0.96	0.63	B2RQC6 P97868 Q06180 Q64364 Q9ERU9	GO_MF
Cluster3	catalytic activity, acting on DNA	1	31	3	214	2.3	0.376	P40201	GO_MF
Cluster3	cation binding	3	31	11	214	1.88	0.202	B2RQC6 P47713 Q60875	GO_MF
Cluster3	cell adhesion molecule binding	1	31	7	214	0.99	0.671	Q06180	GO_MF
Cluster3	chromatin binding	3	31	19	214	1.09	0.541	P40201 P62960 Q9Z1B8	GO_MF
Cluster3	cytokine receptor binding	1	31	4	214	1.73	0.468	Q80U28	GO_MF
Cluster3	cytoskeletal protein binding	2	31	17	214	0.81	0.741	P45591 Q60875	GO_MF
Cluster3	death receptor binding	1	31	1	214	6.9	0.145	Q80U28	GO_MF
Cluster3	dihydroorotase activity	1	31	1	214	6.9	0.145	B2RQC6	GO_MF
Cluster3	disordered domain specific binding	1	31	2	214	3.45	0.269	Q64364	GO_MF
Cluster3	DNA binding	6	31	34	214	1.22	0.365	P62960 Q06180 Q80W88 Q91YM2 Q923D5 Q9R210	GO_MF
Cluster3	DNA helicase activity	1	31	2	214	3.45	0.269	P40201	GO_MF
Cluster3	DNA topoisomerase binding	1	31	1	214	6.9	0.145	Q6PDM2	GO_MF
Cluster3	DNA-binding transcription factor activity	8	31	30	214	1.84	0.0452	P62960 Q64364 Q80W88 Q811F1 Q8R0T2 Q91YM2 Q9R210 Q9Z1B8	GO_MF
Cluster3	DNA-dependent ATPase activity	1	31	2	214	3.45	0.269	P40201	GO_MF
Cluster3	double-stranded DNA binding	3	31	19	214	1.09	0.541	P62960 Q91YM2 Q9R210	GO_MF
Cluster3	drug binding	1	31	11	214	0.63	0.829	B2RQC6	GO_MF
Cluster3	enzyme activator activity	3	31	17	214	1.22	0.459	Q80U28 Q8BYJ6 Q91YM2	GO_MF
Cluster3	enzyme binding	12	31	78	214	1.06	0.463	B2RQC6 P47713 P62960 P97868 Q06180 Q60875 Q64364 Q6PDM2 Q6TXD4 Q80U28 Q8BYJ6 Q9ERU9	GO_MF
Cluster3	enzyme inhibitor activity	1	31	7	214	0.99	0.671	Q64364	GO_MF
Cluster3	enzyme regulator activity	5	31	25	214	1.38	0.284	Q64364 Q80U28 Q8BYJ6 Q91YM2 Q923D5	GO_MF
Cluster3	growth factor binding	1	31	2	214	3.45	0.269	Q3UHX2	GO_MF
Cluster3	GTPase activating protein binding	1	31	1	214	6.9	0.145	Q91YM2	GO_MF
Cluster3	GTPase activator activity	2	31	14	214	0.99	0.632	Q8BYJ6 Q91YM2	GO_MF
Cluster3	GTPase binding	6	31	32	214	1.29	0.307	P62960 Q60875 Q6TXD4 Q80U28 Q8BYJ6 Q9ERU9	GO_MF
Cluster3	GTPase regulator activity	2	31	14	214	0.99	0.632	Q8BYJ6 Q91YM2	GO_MF
Cluster3	guanyl-nucleotide exchange factor activity	3	31	14	214	1.48	0.33	Q60875 Q6TXD4 Q80U28	GO_MF
Cluster3	heat shock protein binding	1	31	2	214	3.45	0.269	Q99KD5	GO_MF
Cluster3	helicase activity	1	31	4	214	1.73	0.468	P40201	GO_MF
Cluster3	heterocyclic compound binding	8	31	68	214	0.81	0.836	B2RQC6 P62960 Q06180 Q6PDM2 Q80W88 Q91YM2 Q923D5 Q9R210	GO_MF
Cluster3	histone acetyltransferase binding	1	31	2	214	3.45	0.269	P47713	GO_MF
Cluster3	histone binding	3	31	7	214	2.96	0.0644	G5E8P1 P40201 Q9Z1B8	GO_MF
Cluster3	Hsp90 protein binding	1	31	1	214	6.9	0.145	Q99KD5	GO_MF
Cluster3	hydrolase activity	4	31	22	214	1.26	0.398	B2RQC6 P40201 P47713 Q06180	GO_MF
Cluster3	hydrolase activity, acting on acid anhydrides	1	31	13	214	0.53	0.877	P40201	GO_MF
Cluster3	hydrolase activity, acting on ester bonds	2	31	5	214	2.76	0.154	P47713 Q06180	GO_MF
Cluster3	identical protein binding	4	31	29	214	0.95	0.638	B2RQC6 Q61033 Q8BJU0 Q9R0L6	GO_MF
Cluster3	integrin binding	1	31	5	214	1.38	0.546	Q06180	GO_MF
Cluster3	ion binding	4	31	29	214	0.95	0.638	B2RQC6 P47713 Q60875 Q91YM2	GO_MF
Cluster3	kinase activator activity	1	31	1	214	6.9	0.145	Q80U28	GO_MF
Cluster3	kinase activity	1	31	20	214	0.35	0.963	B2RQC6	GO_MF
Cluster3	kinase binding	4	31	25	214	1.1	0.506	P97868 Q06180 Q64364 Q6PDM2	GO_MF
Cluster3	kinase inhibitor activity	1	31	5	214	1.38	0.546	Q64364	GO_MF
Cluster3	kinase regulator activity	2	31	6	214	2.3	0.21	Q64364 Q80U28	GO_MF
Cluster3	lamin binding	1	31	1	214	6.9	0.145	Q61033	GO_MF
Cluster3	ligase activity	1	31	2	214	3.45	0.269	B2RQC6	GO_MF
Cluster3	ligase activity, forming carbon-nitrogen bonds	1	31	1	214	6.9	0.145	B2RQC6	GO_MF
Cluster3	lipase activity	1	31	1	214	6.9	0.145	P47713	GO_MF
Cluster3	lipid binding	2	31	10	214	1.38	0.439	P47713 Q91YM2	GO_MF
Cluster3	lysophospholipase activity	1	31	1	214	6.9	0.145	P47713	GO_MF
Cluster3	MDM2/MDM4 family protein binding	1	31	1	214	6.9	0.145	Q64364	GO_MF
Cluster3	metal ion binding	3	31	11	214	1.88	0.202	B2RQC6 P47713 Q60875	GO_MF
Cluster3	methylated histone binding	2	31	4	214	3.45	0.101	P40201 Q9Z1B8	GO_MF
Cluster3	methylation-dependent protein binding	2	31	4	214	3.45	0.101	P40201 Q9Z1B8	GO_MF
Cluster3	microtubule binding	1	31	6	214	1.15	0.614	Q60875	GO_MF
Cluster3	modification-dependent protein binding	2	31	6	214	2.3	0.21	P40201 Q9Z1B8	GO_MF
Cluster3	molecular function regulator	7	31	37	214	1.31	0.271	Q60875 Q64364 Q6TXD4 Q80U28 Q8BYJ6 Q91YM2 Q923D5	GO_MF
Cluster3	mRNA binding	2	31	8	214	1.73	0.327	P62960 Q6PDM2	GO_MF
Cluster3	NF-kappaB binding	1	31	1	214	6.9	0.145	Q64364	GO_MF
Cluster3	nucleic acid binding	7	31	58	214	0.83	0.795	P62960 Q06180 Q6PDM2 Q80W88 Q91YM2 Q923D5 Q9R210	GO_MF
Cluster3	nucleoside binding	1	31	4	214	1.73	0.468	B2RQC6	GO_MF
Cluster3	nucleoside phosphate binding	1	31	13	214	0.53	0.877	B2RQC6	GO_MF
Cluster3	nucleoside-triphosphatase activity	1	31	13	214	0.53	0.877	P40201	GO_MF
Cluster3	nucleoside-triphosphatase regulator activity	2	31	14	214	0.99	0.632	Q8BYJ6 Q91YM2	GO_MF
Cluster3	nucleotide binding	1	31	13	214	0.53	0.877	B2RQC6	GO_MF
Cluster3	organic acid binding	1	31	2	214	3.45	0.269	B2RQC6	GO_MF
Cluster3	organic cyclic compound binding	8	31	69	214	0.8	0.85	B2RQC6 P62960 Q06180 Q6PDM2 Q80W88 Q91YM2 Q923D5 Q9R210	GO_MF
Cluster3	p53 binding	2	31	4	214	3.45	0.101	P62960 Q64364	GO_MF
Cluster3	phosphatase activity	1	31	2	214	3.45	0.269	Q06180	GO_MF
Cluster3	phosphatase regulator activity	1	31	3	214	2.3	0.376	Q923D5	GO_MF
Cluster3	phospholipase A1 activity	1	31	1	214	6.9	0.145	P47713	GO_MF
Cluster3	phospholipase A2 activity	1	31	1	214	6.9	0.145	P47713	GO_MF
Cluster3	phospholipase activity	1	31	1	214	6.9	0.145	P47713	GO_MF
Cluster3	phospholipid binding	2	31	9	214	1.53	0.384	P47713 Q91YM2	GO_MF
Cluster3	phosphoprotein phosphatase activity	1	31	2	214	3.45	0.269	Q06180	GO_MF
Cluster3	phosphoric ester hydrolase activity	1	31	2	214	3.45	0.269	Q06180	GO_MF
Cluster3	platelet-derived growth factor binding	1	31	1	214	6.9	0.145	Q3UHX2	GO_MF
Cluster3	proline-rich region binding	1	31	2	214	3.45	0.269	Q6Y7W8	GO_MF
Cluster3	proteasome binding	1	31	1	214	6.9	0.145	Q9JK23	GO_MF
Cluster3	protein binding	27	31	150	214	1.24	0.0172	B2RQC6 G5E8P1 P40201 P45591 P47713 P62960 P97868 Q06180 Q3UHX2 Q60875 Q61033 Q64364 Q6PDM2 Q6TXD4 Q6Y7W8 Q80U28 Q8BJU0 Q8BTI8 Q8BYJ6 Q91YM2 Q923D5 Q99KD5 Q9CR00 Q9ERU9 Q9R0L6 Q9R210 Q9Z1B8	GO_MF
Cluster3	protein C-terminus binding	1	31	7	214	0.99	0.671	Q9CR00	GO_MF
Cluster3	protein dimerization activity	2	31	20	214	0.69	0.822	Q8BJU0 Q9R210	GO_MF
Cluster3	protein domain specific binding	4	31	27	214	1.02	0.575	Q64364 Q6PDM2 Q8BTI8 Q923D5	GO_MF
Cluster3	protein heterodimerization activity	2	31	13	214	1.06	0.588	Q8BJU0 Q9R210	GO_MF
Cluster3	protein homodimerization activity	1	31	10	214	0.69	0.798	Q8BJU0	GO_MF
Cluster3	protein kinase activator activity	1	31	1	214	6.9	0.145	Q80U28	GO_MF
Cluster3	protein kinase activity	1	31	16	214	0.43	0.926	B2RQC6	GO_MF
Cluster3	protein kinase B binding	1	31	1	214	6.9	0.145	Q6PDM2	GO_MF
Cluster3	protein kinase binding	4	31	24	214	1.15	0.471	P97868 Q06180 Q64364 Q6PDM2	GO_MF
Cluster3	protein kinase inhibitor activity	1	31	5	214	1.38	0.546	Q64364	GO_MF
Cluster3	protein kinase regulator activity	2	31	6	214	2.3	0.21	Q64364 Q80U28	GO_MF
Cluster3	protein N-terminus binding	2	31	3	214	4.6	0.0556	Q64364 Q8BTI8	GO_MF
Cluster3	protein phosphatase regulator activity	1	31	1	214	6.9	0.145	Q923D5	GO_MF
Cluster3	protein self-association	1	31	3	214	2.3	0.376	Q8BJU0	GO_MF
Cluster3	protein serine/threonine kinase inhibitor activity	1	31	1	214	6.9	0.145	Q64364	GO_MF
Cluster3	protein tyrosine kinase binding	1	31	3	214	2.3	0.376	Q06180	GO_MF
Cluster3	protein tyrosine phosphatase activity	1	31	2	214	3.45	0.269	Q06180	GO_MF
Cluster3	protein-containing complex binding	5	31	25	214	1.38	0.284	P45591 Q06180 Q8BJU0 Q91YM2 Q9JK23	GO_MF
Cluster3	purine nucleotide binding	1	31	13	214	0.53	0.877	B2RQC6	GO_MF
Cluster3	purine ribonucleoside triphosphate binding	1	31	12	214	0.58	0.855	B2RQC6	GO_MF
Cluster3	purine ribonucleotide binding	1	31	13	214	0.53	0.877	B2RQC6	GO_MF
Cluster3	pyrimidine nucleoside binding	1	31	1	214	6.9	0.145	B2RQC6	GO_MF
Cluster3	pyrimidine nucleotide binding	1	31	1	214	6.9	0.145	B2RQC6	GO_MF
Cluster3	pyrimidine ribonucleoside binding	1	31	1	214	6.9	0.145	B2RQC6	GO_MF
Cluster3	pyrimidine ribonucleotide binding	1	31	1	214	6.9	0.145	B2RQC6	GO_MF
Cluster3	pyrophosphatase activity	1	31	13	214	0.53	0.877	P40201	GO_MF
Cluster3	Rab GTPase binding	2	31	13	214	1.06	0.588	Q80U28 Q8BYJ6	GO_MF
Cluster3	Rab guanyl-nucleotide exchange factor activity	1	31	4	214	1.73	0.468	Q80U28	GO_MF
Cluster3	Rac GTPase binding	1	31	5	214	1.38	0.546	Q60875	GO_MF
Cluster3	Rac guanyl-nucleotide exchange factor activity	1	31	2	214	3.45	0.269	Q60875	GO_MF
Cluster3	Ran GTPase binding	1	31	1	214	6.9	0.145	Q9ERU9	GO_MF
Cluster3	Ras GTPase binding	5	31	30	214	1.15	0.446	Q60875 Q6TXD4 Q80U28 Q8BYJ6 Q9ERU9	GO_MF
Cluster3	Ras guanyl-nucleotide exchange factor activity	3	31	14	214	1.48	0.33	Q60875 Q6TXD4 Q80U28	GO_MF
Cluster3	receptor tyrosine kinase binding	1	31	3	214	2.3	0.376	Q06180	GO_MF
Cluster3	regulatory region nucleic acid binding	3	31	22	214	0.94	0.65	P62960 Q91YM2 Q9R210	GO_MF
Cluster3	Rho GTPase binding	2	31	12	214	1.15	0.542	Q60875 Q6TXD4	GO_MF
Cluster3	Rho guanyl-nucleotide exchange factor activity	2	31	7	214	1.97	0.268	Q60875 Q6TXD4	GO_MF
Cluster3	ribonucleoside binding	1	31	4	214	1.73	0.468	B2RQC6	GO_MF
Cluster3	ribonucleotide binding	1	31	13	214	0.53	0.877	B2RQC6	GO_MF
Cluster3	RNA binding	2	31	26	214	0.53	0.921	P62960 Q6PDM2	GO_MF
Cluster3	RS domain binding	1	31	1	214	6.9	0.145	Q6PDM2	GO_MF
Cluster3	sequence-specific DNA binding	3	31	23	214	0.9	0.682	P62960 Q91YM2 Q9R210	GO_MF
Cluster3	sequence-specific double-stranded DNA binding	3	31	19	214	1.09	0.541	P62960 Q91YM2 Q9R210	GO_MF
Cluster3	signaling receptor binding	2	31	23	214	0.6	0.881	Q06180 Q80U28	GO_MF
Cluster3	single-stranded DNA binding	2	31	6	214	2.3	0.21	P62960 Q923D5	GO_MF
Cluster3	small GTPase binding	5	31	30	214	1.15	0.446	Q60875 Q6TXD4 Q80U28 Q8BYJ6 Q9ERU9	GO_MF
Cluster3	small molecule binding	1	31	14	214	0.49	0.896	B2RQC6	GO_MF
Cluster3	SNARE binding	1	31	4	214	1.73	0.468	Q06180	GO_MF
Cluster3	STAT family protein binding	1	31	1	214	6.9	0.145	Q06180	GO_MF
Cluster3	SUMO transferase activity	2	31	2	214	6.9	0.0204	Q64364 Q9ERU9	GO_MF
Cluster3	syntaxin binding	1	31	3	214	2.3	0.376	Q06180	GO_MF
Cluster3	transcription coactivator activity	1	31	11	214	0.63	0.829	Q9CR00	GO_MF
Cluster3	transcription coregulator activity	3	31	19	214	1.09	0.541	Q80W88 Q91YM2 Q9CR00	GO_MF
Cluster3	transcription corepressor activity	2	31	7	214	1.97	0.268	Q80W88 Q91YM2	GO_MF
Cluster3	transcription factor binding	4	31	23	214	1.2	0.435	P62960 Q60875 Q64364 Q9CR00	GO_MF
Cluster3	transcription regulator activity	9	31	38	214	1.63	0.0688	P62960 Q64364 Q80W88 Q811F1 Q8R0T2 Q91YM2 Q9CR00 Q9R210 Q9Z1B8	GO_MF
Cluster3	transferase activity	4	31	39	214	0.71	0.862	B2RQC6 P97868 Q64364 Q9ERU9	GO_MF
Cluster3	transition metal ion binding	2	31	7	214	1.97	0.268	B2RQC6 Q60875	GO_MF
Cluster3	tubulin binding	1	31	8	214	0.86	0.72	Q60875	GO_MF
Cluster3	tumor necrosis factor receptor superfamily binding	1	31	1	214	6.9	0.145	Q80U28	GO_MF
Cluster3	ubiquitin ligase inhibitor activity	1	31	1	214	6.9	0.145	Q64364	GO_MF
Cluster3	ubiquitin protein ligase activity	1	31	3	214	2.3	0.376	P97868	GO_MF
Cluster3	ubiquitin-like protein ligase activity	1	31	3	214	2.3	0.376	P97868	GO_MF
Cluster3	ubiquitin-like protein transferase activity	3	31	9	214	2.3	0.126	P97868 Q64364 Q9ERU9	GO_MF
Cluster3	ubiquitin-protein transferase activity	1	31	7	214	0.99	0.671	P97868	GO_MF
Cluster3	ubiquitin-protein transferase inhibitor activity	1	31	1	214	6.9	0.145	Q64364	GO_MF
Cluster3	ubiquitin-protein transferase regulator activity	1	31	1	214	6.9	0.145	Q64364	GO_MF
Cluster3	UTP binding	1	31	1	214	6.9	0.145	B2RQC6	GO_MF
Cluster3	WW domain binding	1	31	1	214	6.9	0.145	Q923D5	GO_MF
Cluster3	zinc ion binding	2	31	6	214	2.3	0.21	B2RQC6 Q60875	GO_MF
Cluster4	2-oxoglutarate-dependent dioxygenase activity	1	26	2	214	4.12	0.229	Q8BSY0	GO_MF
Cluster4	actin binding	2	26	6	214	2.74	0.157	Q62417 Q9QYR6	GO_MF
Cluster4	adenyl nucleotide binding	1	26	10	214	0.82	0.734	Q6NZJ6	GO_MF
Cluster4	adenyl ribonucleotide binding	1	26	10	214	0.82	0.734	Q6NZJ6	GO_MF
Cluster4	amide binding	2	26	4	214	4.12	0.0732	E9Q5C9 Q80UW2	GO_MF
Cluster4	amyloid-beta binding	1	26	2	214	4.12	0.229	Q80UW2	GO_MF
Cluster4	androgen receptor binding	1	26	2	214	4.12	0.229	Q61656	GO_MF
Cluster4	anion binding	1	26	22	214	0.37	0.951	Q6NZJ6	GO_MF
Cluster4	annealing activity	1	26	1	214	8.23	0.121	Q8BGD9	GO_MF
Cluster4	ATP binding	1	26	10	214	0.82	0.734	Q6NZJ6	GO_MF
Cluster4	ATPase activity	1	26	7	214	1.18	0.602	Q61656	GO_MF
Cluster4	beta-catenin binding	1	26	4	214	2.06	0.407	Q61062	GO_MF
Cluster4	binding	22	26	184	214	0.98	0.711	E9Q5C9 O08553 P39447 Q3TLH4 Q3UH06 Q61062 Q61656 Q62417 Q62433 Q6NZJ6 Q6PHZ5 Q76LS9 Q7TPV4 Q80UW2 Q8BGD9 Q8BSY0 Q8BTI8 Q8CCH7 Q91W92 Q923D5 Q9CQS2 Q9QYR6	GO_MF
Cluster4	box C/D snoRNA binding	1	26	1	214	8.23	0.121	E9Q5C9	GO_MF
Cluster4	box H/ACA snoRNA binding	2	26	2	214	8.23	0.0143	E9Q5C9 Q9CQS2	GO_MF
Cluster4	C2H2 zinc finger domain binding	1	26	1	214	8.23	0.121	Q8BTI8	GO_MF
Cluster4	cadherin binding	1	26	1	214	8.23	0.121	Q62433	GO_MF
Cluster4	calcium channel activity	1	26	2	214	4.12	0.229	Q99J21	GO_MF
Cluster4	calcium ion binding	1	26	2	214	4.12	0.229	Q8BSY0	GO_MF
Cluster4	calcium ion transmembrane transporter activity	1	26	2	214	4.12	0.229	Q99J21	GO_MF
Cluster4	calcium-dependent protein binding	1	26	3	214	2.74	0.323	Q61656	GO_MF
Cluster4	calcium-release channel activity	1	26	1	214	8.23	0.121	Q99J21	GO_MF
Cluster4	calmodulin binding	1	26	2	214	4.12	0.229	Q61656	GO_MF
Cluster4	carbohydrate binding	1	26	1	214	8.23	0.121	Q80UW2	GO_MF
Cluster4	carbohydrate derivative binding	1	26	13	214	0.63	0.824	Q6NZJ6	GO_MF
Cluster4	carboxypeptidase activity	1	26	1	214	8.23	0.121	Q76LS9	GO_MF
Cluster4	catalytic activity	8	26	68	214	0.97	0.626	O08553 P52483 Q61084 Q61656 Q76LS9 Q80UW2 Q8BGD9 Q8BSY0	GO_MF
Cluster4	catalytic activity, acting on a protein	5	26	36	214	1.14	0.453	P52483 Q61084 Q76LS9 Q80UW2 Q8BSY0	GO_MF
Cluster4	catalytic activity, acting on RNA	1	26	7	214	1.18	0.602	Q61656	GO_MF
Cluster4	cation binding	3	26	11	214	2.24	0.136	Q7TPV4 Q8BSY0 Q8CCH7	GO_MF
Cluster4	cation channel activity	1	26	2	214	4.12	0.229	Q99J21	GO_MF
Cluster4	cation transmembrane transporter activity	1	26	4	214	2.06	0.407	Q99J21	GO_MF
Cluster4	cell adhesion molecule binding	1	26	7	214	1.18	0.602	Q62433	GO_MF
Cluster4	channel activity	1	26	5	214	1.65	0.48	Q99J21	GO_MF
Cluster4	chromatin binding	1	26	19	214	0.43	0.924	Q61656	GO_MF
Cluster4	collagen binding	1	26	1	214	8.23	0.121	Q9QYR6	GO_MF
Cluster4	connexin binding	1	26	1	214	8.23	0.121	P39447	GO_MF
Cluster4	core promoter sequence-specific DNA binding	1	26	2	214	4.12	0.229	Q3UH06	GO_MF
Cluster4	cysteine-type carboxypeptidase activity	1	26	1	214	8.23	0.121	Q76LS9	GO_MF
Cluster4	cysteine-type exopeptidase activity	1	26	1	214	8.23	0.121	Q76LS9	GO_MF
Cluster4	cysteine-type peptidase activity	1	26	1	214	8.23	0.121	Q76LS9	GO_MF
Cluster4	cytoskeletal anchor activity	1	26	2	214	4.12	0.229	Q9QYR6	GO_MF
Cluster4	cytoskeletal protein binding	3	26	17	214	1.45	0.341	Q62417 Q62433 Q9QYR6	GO_MF
Cluster4	dihydropyrimidinase activity	1	26	1	214	8.23	0.121	O08553	GO_MF
Cluster4	dioxygenase activity	1	26	2	214	4.12	0.229	Q8BSY0	GO_MF
Cluster4	DNA binding	3	26	34	214	0.73	0.823	Q3UH06 Q7TPV4 Q923D5	GO_MF
Cluster4	DNA-binding transcription factor activity	3	26	30	214	0.82	0.744	E9Q5C9 Q3UH06 Q8CCH7	GO_MF
Cluster4	double-stranded DNA binding	2	26	19	214	0.87	0.704	Q3UH06 Q7TPV4	GO_MF
Cluster4	double-stranded RNA binding	1	26	4	214	2.06	0.407	Q8BGD9	GO_MF
Cluster4	drug binding	1	26	11	214	0.75	0.768	Q6NZJ6	GO_MF
Cluster4	E-box binding	1	26	2	214	4.12	0.229	Q7TPV4	GO_MF
Cluster4	endopeptidase inhibitor activity	1	26	2	214	4.12	0.229	P29699	GO_MF
Cluster4	endopeptidase regulator activity	1	26	2	214	4.12	0.229	P29699	GO_MF
Cluster4	enzyme activator activity	1	26	17	214	0.48	0.899	Q91W92	GO_MF
Cluster4	enzyme binding	7	26	78	214	0.74	0.904	E9Q5C9 O08553 Q61062 Q61656 Q62417 Q62433 Q91W92	GO_MF
Cluster4	enzyme inhibitor activity	1	26	7	214	1.18	0.602	P29699	GO_MF
Cluster4	enzyme regulator activity	3	26	25	214	0.99	0.614	P29699 Q91W92 Q923D5	GO_MF
Cluster4	eukaryotic initiation factor 4E binding	1	26	1	214	8.23	0.121	Q6NZJ6	GO_MF
Cluster4	exopeptidase activity	1	26	1	214	8.23	0.121	Q76LS9	GO_MF
Cluster4	frizzled binding	1	26	1	214	8.23	0.121	Q61062	GO_MF
Cluster4	G protein-coupled receptor binding	1	26	2	214	4.12	0.229	Q61062	GO_MF
Cluster4	gamma-tubulin binding	1	26	1	214	8.23	0.121	Q62433	GO_MF
Cluster4	gated channel activity	1	26	3	214	2.74	0.323	Q99J21	GO_MF
Cluster4	glutamate receptor binding	1	26	2	214	4.12	0.229	Q9QYR6	GO_MF
Cluster4	GTP-Rho binding	1	26	1	214	8.23	0.121	Q91W92	GO_MF
Cluster4	GTPase activator activity	1	26	14	214	0.59	0.847	Q91W92	GO_MF
Cluster4	GTPase binding	3	26	32	214	0.77	0.786	Q61062 Q62433 Q91W92	GO_MF
Cluster4	GTPase regulator activity	1	26	14	214	0.59	0.847	Q91W92	GO_MF
Cluster4	helicase activity	2	26	4	214	4.12	0.0732	Q61656 Q8BGD9	GO_MF
Cluster4	heterocyclic compound binding	9	26	68	214	1.09	0.449	E9Q5C9 Q3UH06 Q61656 Q6NZJ6 Q6PHZ5 Q7TPV4 Q8BGD9 Q923D5 Q9CQS2	GO_MF
Cluster4	hormone receptor binding	1	26	4	214	2.06	0.407	Q61656	GO_MF
Cluster4	hydrolase activity	4	26	22	214	1.5	0.269	O08553 Q61656 Q76LS9 Q8BGD9	GO_MF
Cluster4	hydrolase activity, acting on acid anhydrides	2	26	13	214	1.27	0.486	Q61656 Q8BGD9	GO_MF
Cluster4	identical protein binding	2	26	29	214	0.57	0.9	O08553 Q6NZJ6	GO_MF
Cluster4	insulin receptor binding	1	26	2	214	4.12	0.229	Q62417	GO_MF
Cluster4	intracellular ligand-gated ion channel activity	1	26	1	214	8.23	0.121	Q99J21	GO_MF
Cluster4	ion binding	4	26	29	214	1.14	0.482	Q6NZJ6 Q7TPV4 Q8BSY0 Q8CCH7	GO_MF
Cluster4	ion channel activity	1	26	5	214	1.65	0.48	Q99J21	GO_MF
Cluster4	ion gated channel activity	1	26	3	214	2.74	0.323	Q99J21	GO_MF
Cluster4	ion transmembrane transporter activity	1	26	7	214	1.18	0.602	Q99J21	GO_MF
Cluster4	ionotropic glutamate receptor binding	1	26	2	214	4.12	0.229	Q9QYR6	GO_MF
Cluster4	iron ion transmembrane transporter activity	1	26	1	214	8.23	0.121	Q99J21	GO_MF
Cluster4	kinase activity	1	26	20	214	0.41	0.934	Q61084	GO_MF
Cluster4	kinase binding	2	26	25	214	0.66	0.842	O08553 Q62417	GO_MF
Cluster4	kinase inhibitor activity	1	26	5	214	1.65	0.48	P29699	GO_MF
Cluster4	kinase regulator activity	1	26	6	214	1.37	0.545	P29699	GO_MF
Cluster4	ligand-gated calcium channel activity	1	26	1	214	8.23	0.121	Q99J21	GO_MF
Cluster4	ligand-gated cation channel activity	1	26	1	214	8.23	0.121	Q99J21	GO_MF
Cluster4	ligand-gated channel activity	1	26	1	214	8.23	0.121	Q99J21	GO_MF
Cluster4	ligand-gated ion channel activity	1	26	1	214	8.23	0.121	Q99J21	GO_MF
Cluster4	Lys48-specific deubiquitinase activity	1	26	1	214	8.23	0.121	Q76LS9	GO_MF
Cluster4	MAP kinase kinase kinase activity	1	26	2	214	4.12	0.229	Q61084	GO_MF
Cluster4	metal ion binding	3	26	11	214	2.24	0.136	Q7TPV4 Q8BSY0 Q8CCH7	GO_MF
Cluster4	metal ion transmembrane transporter activity	1	26	4	214	2.06	0.407	Q99J21	GO_MF
Cluster4	MH2 domain binding	1	26	1	214	8.23	0.121	Q61656	GO_MF
Cluster4	microtubule binding	2	26	6	214	2.74	0.157	Q62433 Q9QYR6	GO_MF
Cluster4	modification-dependent protein binding	1	26	6	214	1.37	0.545	Q76LS9	GO_MF
Cluster4	molecular adaptor activity	3	26	12	214	2.06	0.166	Q61062 Q62417 Q9QYR6	GO_MF
Cluster4	molecular function regulator	3	26	37	214	0.67	0.868	P29699 Q91W92 Q923D5	GO_MF
Cluster4	mRNA 3'-UTR binding	1	26	1	214	8.23	0.121	Q61656	GO_MF
Cluster4	mRNA binding	2	26	8	214	2.06	0.252	Q61656 Q6NZJ6	GO_MF
Cluster4	NAADP-sensitive calcium-release channel activity	1	26	1	214	8.23	0.121	Q99J21	GO_MF
Cluster4	nuclear hormone receptor binding	1	26	4	214	2.06	0.407	Q61656	GO_MF
Cluster4	nuclear localization sequence binding	1	26	1	214	8.23	0.121	E9Q5C9	GO_MF
Cluster4	nucleic acid binding	9	26	58	214	1.28	0.243	E9Q5C9 Q3UH06 Q61656 Q6NZJ6 Q6PHZ5 Q7TPV4 Q8BGD9 Q923D5 Q9CQS2	GO_MF
Cluster4	nucleoside phosphate binding	1	26	13	214	0.63	0.824	Q6NZJ6	GO_MF
Cluster4	nucleoside-triphosphatase activity	2	26	13	214	1.27	0.486	Q61656 Q8BGD9	GO_MF
Cluster4	nucleoside-triphosphatase regulator activity	1	26	14	214	0.59	0.847	Q91W92	GO_MF
Cluster4	nucleotide binding	1	26	13	214	0.63	0.824	Q6NZJ6	GO_MF
Cluster4	organic cyclic compound binding	9	26	69	214	1.07	0.471	E9Q5C9 Q3UH06 Q61656 Q6NZJ6 Q6PHZ5 Q7TPV4 Q8BGD9 Q923D5 Q9CQS2	GO_MF
Cluster4	oxidoreductase activity	1	26	4	214	2.06	0.407	Q8BSY0	GO_MF
Cluster4	passive transmembrane transporter activity	1	26	5	214	1.65	0.48	Q99J21	GO_MF
Cluster4	peptidase activity	1	26	2	214	4.12	0.229	Q76LS9	GO_MF
Cluster4	peptidase inhibitor activity	1	26	2	214	4.12	0.229	P29699	GO_MF
Cluster4	peptidase regulator activity	1	26	2	214	4.12	0.229	P29699	GO_MF
Cluster4	peptide binding	2	26	4	214	4.12	0.0732	E9Q5C9 Q80UW2	GO_MF
Cluster4	peptide-aspartate beta-dioxygenase activity	1	26	1	214	8.23	0.121	Q8BSY0	GO_MF
Cluster4	phosphatase regulator activity	1	26	3	214	2.74	0.323	Q923D5	GO_MF
Cluster4	pre-mRNA binding	1	26	1	214	8.23	0.121	Q61656	GO_MF
Cluster4	primary miRNA binding	1	26	2	214	4.12	0.229	Q61656	GO_MF
Cluster4	promoter-specific chromatin binding	1	26	2	214	4.12	0.229	Q61656	GO_MF
Cluster4	protease binding	1	26	2	214	4.12	0.229	Q61062	GO_MF
Cluster4	protein binding	16	26	150	214	0.88	0.892	E9Q5C9 O08553 P39447 Q3TLH4 Q61062 Q61656 Q62417 Q62433 Q6NZJ6 Q76LS9 Q7TPV4 Q8BTI8 Q8CCH7 Q91W92 Q923D5 Q9QYR6	GO_MF
Cluster4	protein C-terminus binding	2	26	7	214	2.35	0.203	P39447 Q3TLH4	GO_MF
Cluster4	protein dimerization activity	2	26	20	214	0.82	0.732	E9Q5C9 Q61062	GO_MF
Cluster4	protein domain specific binding	5	26	27	214	1.52	0.214	E9Q5C9 P39447 Q61656 Q8BTI8 Q923D5	GO_MF
Cluster4	protein heterodimerization activity	2	26	13	214	1.27	0.486	E9Q5C9 Q61062	GO_MF
Cluster4	protein kinase activity	1	26	16	214	0.51	0.884	Q61084	GO_MF
Cluster4	protein kinase binding	2	26	24	214	0.69	0.824	O08553 Q62417	GO_MF
Cluster4	protein kinase inhibitor activity	1	26	5	214	1.65	0.48	P29699	GO_MF
Cluster4	protein kinase regulator activity	1	26	6	214	1.37	0.545	P29699	GO_MF
Cluster4	protein N-terminus binding	1	26	3	214	2.74	0.323	Q8BTI8	GO_MF
Cluster4	protein phosphatase regulator activity	1	26	1	214	8.23	0.121	Q923D5	GO_MF
Cluster4	protein serine/threonine kinase activity	1	26	13	214	0.63	0.824	Q61084	GO_MF
Cluster4	protein tyrosine kinase inhibitor activity	1	26	2	214	4.12	0.229	P29699	GO_MF
Cluster4	protein-containing complex binding	4	26	25	214	1.32	0.36	Q61656 Q62417 Q8BGD9 Q9QYR6	GO_MF
Cluster4	protein-macromolecule adaptor activity	3	26	11	214	2.24	0.136	Q61062 Q62417 Q9QYR6	GO_MF
Cluster4	purine nucleotide binding	1	26	13	214	0.63	0.824	Q6NZJ6	GO_MF
Cluster4	purine ribonucleoside triphosphate binding	1	26	12	214	0.69	0.798	Q6NZJ6	GO_MF
Cluster4	purine ribonucleotide binding	1	26	13	214	0.63	0.824	Q6NZJ6	GO_MF
Cluster4	pyrophosphatase activity	2	26	13	214	1.27	0.486	Q61656 Q8BGD9	GO_MF
Cluster4	R-SMAD binding	1	26	4	214	2.06	0.407	Q61656	GO_MF
Cluster4	Rab GTPase binding	1	26	13	214	0.63	0.824	Q62433	GO_MF
Cluster4	Rac GTPase binding	1	26	5	214	1.65	0.48	Q61062	GO_MF
Cluster4	Ras GTPase binding	3	26	30	214	0.82	0.744	Q61062 Q62433 Q91W92	GO_MF
Cluster4	regulatory region nucleic acid binding	2	26	22	214	0.75	0.782	Q3UH06 Q7TPV4	GO_MF
Cluster4	Rho GTPase binding	2	26	12	214	1.37	0.442	Q61062 Q91W92	GO_MF
Cluster4	ribonucleoprotein complex binding	2	26	4	214	4.12	0.0732	Q61656 Q8BGD9	GO_MF
Cluster4	ribonucleotide binding	1	26	13	214	0.63	0.824	Q6NZJ6	GO_MF
Cluster4	ribosomal small subunit binding	1	26	1	214	8.23	0.121	Q8BGD9	GO_MF
Cluster4	RNA binding	6	26	26	214	1.9	0.0738	E9Q5C9 Q61656 Q6NZJ6 Q6PHZ5 Q8BGD9 Q9CQS2	GO_MF
Cluster4	RNA helicase activity	1	26	2	214	4.12	0.229	Q61656	GO_MF
Cluster4	RNA polymerase binding	1	26	7	214	1.18	0.602	E9Q5C9	GO_MF
Cluster4	RNA polymerase core enzyme binding	1	26	6	214	1.37	0.545	E9Q5C9	GO_MF
Cluster4	RNA polymerase I core binding	1	26	2	214	4.12	0.229	E9Q5C9	GO_MF
Cluster4	RNA polymerase II transcription factor binding	1	26	4	214	2.06	0.407	Q8CCH7	GO_MF
Cluster4	RNA strand annealing activity	1	26	1	214	8.23	0.121	Q8BGD9	GO_MF
Cluster4	RNA strand-exchange activity	1	26	1	214	8.23	0.121	Q8BGD9	GO_MF
Cluster4	RNA-dependent ATPase activity	1	26	2	214	4.12	0.229	Q61656	GO_MF
Cluster4	sequence-specific DNA binding	2	26	23	214	0.72	0.804	Q3UH06 Q7TPV4	GO_MF
Cluster4	sequence-specific double-stranded DNA binding	2	26	19	214	0.87	0.704	Q3UH06 Q7TPV4	GO_MF
Cluster4	signal sequence binding	1	26	1	214	8.23	0.121	E9Q5C9	GO_MF
Cluster4	signaling adaptor activity	1	26	5	214	1.65	0.48	Q62417	GO_MF
Cluster4	signaling receptor binding	4	26	23	214	1.43	0.299	Q61062 Q61656 Q62417 Q9QYR6	GO_MF
Cluster4	single-stranded DNA binding	1	26	6	214	1.37	0.545	Q923D5	GO_MF
Cluster4	single-stranded RNA binding	1	26	3	214	2.74	0.323	Q8BGD9	GO_MF
Cluster4	SMAD binding	1	26	5	214	1.65	0.48	Q61656	GO_MF
Cluster4	small GTPase binding	3	26	30	214	0.82	0.744	Q61062 Q62433 Q91W92	GO_MF
Cluster4	small molecule binding	1	26	14	214	0.59	0.847	Q6NZJ6	GO_MF
Cluster4	snoRNA binding	2	26	3	214	5.49	0.0396	E9Q5C9 Q9CQS2	GO_MF
Cluster4	steroid hormone receptor binding	1	26	2	214	4.12	0.229	Q61656	GO_MF
Cluster4	structural molecule activity	2	26	11	214	1.5	0.396	Q6NZJ6 Q9QYR6	GO_MF
Cluster4	telomerase RNA binding	1	26	1	214	8.23	0.121	Q9CQS2	GO_MF
Cluster4	transcription coactivator activity	1	26	11	214	0.75	0.768	Q8CCH7	GO_MF
Cluster4	transcription coregulator activity	3	26	19	214	1.3	0.414	Q61656 Q7TPV4 Q8CCH7	GO_MF
Cluster4	transcription corepressor activity	2	26	7	214	2.35	0.203	Q7TPV4 Q8CCH7	GO_MF
Cluster4	transcription factor binding	5	26	23	214	1.79	0.127	E9Q5C9 Q61656 Q62417 Q7TPV4 Q8CCH7	GO_MF
Cluster4	transcription regulator activity	5	26	38	214	1.08	0.507	E9Q5C9 Q3UH06 Q61656 Q7TPV4 Q8CCH7	GO_MF
Cluster4	transferase activity	3	26	39	214	0.63	0.893	P52483 Q61084 Q80UW2	GO_MF
Cluster4	transition metal ion binding	2	26	7	214	2.35	0.203	Q7TPV4 Q8CCH7	GO_MF
Cluster4	translation factor activity, RNA binding	2	26	3	214	5.49	0.0396	Q6NZJ6 Q8BGD9	GO_MF
Cluster4	translation initiation factor activity	2	26	3	214	5.49	0.0396	Q6NZJ6 Q8BGD9	GO_MF
Cluster4	translation initiation factor binding	1	26	2	214	4.12	0.229	Q6NZJ6	GO_MF
Cluster4	transmembrane transporter activity	1	26	7	214	1.18	0.602	Q99J21	GO_MF
Cluster4	transporter activity	1	26	9	214	0.91	0.696	Q99J21	GO_MF
Cluster4	tubulin binding	2	26	8	214	2.06	0.252	Q62433 Q9QYR6	GO_MF
Cluster4	ubiquitin conjugating enzyme activity	1	26	2	214	4.12	0.229	P52483	GO_MF
Cluster4	ubiquitin protein ligase binding	1	26	5	214	1.65	0.48	Q62417	GO_MF
Cluster4	ubiquitin-like protein conjugating enzyme activity	1	26	2	214	4.12	0.229	P52483	GO_MF
Cluster4	ubiquitin-like protein ligase binding	1	26	5	214	1.65	0.48	Q62417	GO_MF
Cluster4	ubiquitin-like protein transferase activity	2	26	9	214	1.83	0.3	P52483 Q80UW2	GO_MF
Cluster4	ubiquitin-protein transferase activity	2	26	7	214	2.35	0.203	P52483 Q80UW2	GO_MF
Cluster4	ubiquitinyl hydrolase activity	1	26	1	214	8.23	0.121	Q76LS9	GO_MF
Cluster4	WW domain binding	1	26	1	214	8.23	0.121	Q923D5	GO_MF
Cluster4	zinc ion binding	2	26	6	214	2.74	0.157	Q7TPV4 Q8CCH7	GO_MF
Cluster5	1-phosphatidylinositol-3-kinase activity	2	60	3	214	2.38	0.19	P81122 Q8C180	GO_MF
Cluster5	14-3-3 protein binding	1	60	1	214	3.57	0.28	P81122	GO_MF
Cluster5	actin binding	2	60	6	214	1.19	0.539	Q3TN34 Q9QY06	GO_MF
Cluster5	actin filament binding	2	60	3	214	2.38	0.19	Q3TN34 Q9QY06	GO_MF
Cluster5	actin-dependent ATPase activity	1	60	1	214	3.57	0.28	Q9QY06	GO_MF
Cluster5	actinin binding	1	60	2	214	1.78	0.483	Q3TN34	GO_MF
Cluster5	activating transcription factor binding	3	60	4	214	2.68	0.0678	P05627 P70399 Q61191	GO_MF
Cluster5	active transmembrane transporter activity	1	60	1	214	3.57	0.28	Q61165	GO_MF
Cluster5	acyl-CoA dehydrogenase activity	1	60	1	214	3.57	0.28	Q8JZN5	GO_MF
Cluster5	adenyl nucleotide binding	2	60	10	214	0.71	0.824	Q9QY06 Q9WVS8	GO_MF
Cluster5	adenyl ribonucleotide binding	2	60	10	214	0.71	0.824	Q9QY06 Q9WVS8	GO_MF
Cluster5	adenylyltransferase activity	1	60	2	214	1.78	0.483	Q6PCL9	GO_MF
Cluster5	ADP binding	1	60	1	214	3.57	0.28	Q9QY06	GO_MF
Cluster5	amide binding	1	60	4	214	0.89	0.735	Q9DBR4	GO_MF
Cluster5	AMP-activated protein kinase activity	1	60	2	214	1.78	0.483	Q6PAM0	GO_MF
Cluster5	amyloid-beta binding	1	60	2	214	1.78	0.483	Q9DBR4	GO_MF
Cluster5	anion binding	7	60	22	214	1.13	0.423	P98078 Q61165 Q8CFD4 Q8K382 Q9QWY8 Q9QY06 Q9WVS8	GO_MF
Cluster5	anion channel activity	2	60	3	214	2.38	0.19	O70496 Q99LI2	GO_MF
Cluster5	anion transmembrane transporter activity	2	60	3	214	2.38	0.19	O70496 Q99LI2	GO_MF
Cluster5	antiporter activity	1	60	1	214	3.57	0.28	Q61165	GO_MF
Cluster5	AP-2 adaptor complex binding	1	60	1	214	3.57	0.28	P98078	GO_MF
Cluster5	ATP binding	2	60	10	214	0.71	0.824	Q9QY06 Q9WVS8	GO_MF
Cluster5	ATP-dependent microtubule motor activity	1	60	1	214	3.57	0.28	P33174	GO_MF
Cluster5	ATP-dependent protein binding	1	60	1	214	3.57	0.28	Q9QY06	GO_MF
Cluster5	ATPase activity	2	60	7	214	1.02	0.631	P33174 Q9QY06	GO_MF
Cluster5	ATPase binding	1	60	4	214	0.89	0.735	Q8C8R3	GO_MF
Cluster5	basal transcription machinery binding	1	60	4	214	0.89	0.735	Q5XJE5	GO_MF
Cluster5	beta-catenin binding	1	60	4	214	0.89	0.735	Q9D219	GO_MF
Cluster5	binding	49	60	184	214	0.95	0.91	O54916 O54918 O88746 O88796 P05627 P54726 P70399 P70459 P81122 P98078 Q04863 Q3TLD5 Q3TN34 Q3UYV9 Q5XJE5 Q60949 Q61165 Q61191 Q69Z38 Q6NVE8 Q6PAM0 Q6PCL9 Q6PFR5 Q6Y685 Q80TM9 Q80U72 Q80V62 Q80WC3 Q8BHL3 Q8BQZ4 Q8BZ32 Q8C180 Q8C8R3 Q8CFD4 Q8CGF1 Q8K019 Q8K382 Q8R1A4 Q99PP7 Q9D0F4 Q9D219 Q9D4J7 Q9DBR4 Q9DBY0 Q9JL61 Q9QWY8 Q9QY06 Q9WVS8 Q9Z131	GO_MF
Cluster5	calcium-dependent protein binding	1	60	3	214	1.19	0.629	Q61165	GO_MF
Cluster5	calmodulin binding	1	60	2	214	1.78	0.483	Q9QY06	GO_MF
Cluster5	cAMP response element binding	1	60	1	214	3.57	0.28	P05627	GO_MF
Cluster5	carbohydrate derivative binding	2	60	13	214	0.55	0.922	Q9QY06 Q9WVS8	GO_MF
Cluster5	cargo receptor activity	1	60	1	214	3.57	0.28	P98078	GO_MF
Cluster5	catalytic activity	16	60	68	214	0.84	0.879	O70475 O88738 O88796 P33174 P81122 Q69Z38 Q69ZR2 Q6PAM0 Q6PCL9 Q80U72 Q8C180 Q8JZN5 Q8K3A9 Q99PP7 Q9QY06 Q9WVS8	GO_MF
Cluster5	catalytic activity, acting on a protein	6	60	36	214	0.59	0.974	O88738 Q69Z38 Q69ZR2 Q6PAM0 Q99PP7 Q9WVS8	GO_MF
Cluster5	catalytic activity, acting on a tRNA	1	60	2	214	1.78	0.483	O88796	GO_MF
Cluster5	catalytic activity, acting on RNA	2	60	7	214	1.02	0.631	O88796 Q8K3A9	GO_MF
Cluster5	cation binding	2	60	11	214	0.65	0.865	Q6PCL9 Q9QY06	GO_MF
Cluster5	cation transmembrane transporter activity	1	60	4	214	0.89	0.735	Q61165	GO_MF
Cluster5	cation:cation antiporter activity	1	60	1	214	3.57	0.28	Q61165	GO_MF
Cluster5	cell adhesion molecule binding	2	60	7	214	1.02	0.631	P98078 Q80TM9	GO_MF
Cluster5	channel activity	2	60	5	214	1.43	0.432	O70496 Q99LI2	GO_MF
Cluster5	chloride channel activity	2	60	3	214	2.38	0.19	O70496 Q99LI2	GO_MF
Cluster5	chloride transmembrane transporter activity	2	60	3	214	2.38	0.19	O70496 Q99LI2	GO_MF
Cluster5	chromatin binding	6	60	19	214	1.13	0.45	P05627 Q04863 Q3TLD5 Q61191 Q80WC3 Q9D0F4	GO_MF
Cluster5	chromatin DNA binding	1	60	4	214	0.89	0.735	Q9D0F4	GO_MF
Cluster5	clathrin adaptor activity	1	60	1	214	3.57	0.28	P98078	GO_MF
Cluster5	clathrin binding	2	60	2	214	3.57	0.0777	O88746 P98078	GO_MF
Cluster5	co-SMAD binding	1	60	1	214	3.57	0.28	Q99PP7	GO_MF
Cluster5	cysteine-type endopeptidase inhibitor activity	1	60	1	214	3.57	0.28	O88738	GO_MF
Cluster5	cytokine receptor binding	1	60	4	214	0.89	0.735	Q8C180	GO_MF
Cluster5	cytoskeletal protein binding	5	60	17	214	1.05	0.545	O54918 Q3TN34 Q8C8R3 Q9D4J7 Q9QY06	GO_MF
Cluster5	damaged DNA binding	1	60	1	214	3.57	0.28	P70399	GO_MF
Cluster5	DNA binding	11	60	34	214	1.15	0.337	P05627 P54726 P70399 P70459 Q04863 Q80WC3 Q8K019 Q9D0F4 Q9D4J7 Q9DBY0 Q9JL61	GO_MF
Cluster5	DNA polymerase binding	1	60	1	214	3.57	0.28	Q80V62	GO_MF
Cluster5	DNA-binding transcription factor activity	8	60	30	214	0.95	0.647	P05627 P70459 Q04863 Q61191 Q9D4J7 Q9DBY0 Q9EQN3 Q9JL61	GO_MF
Cluster5	double-stranded DNA binding	5	60	19	214	0.94	0.66	P05627 Q04863 Q80WC3 Q9DBY0 Q9JL61	GO_MF
Cluster5	drug binding	2	60	11	214	0.65	0.865	Q9QY06 Q9WVS8	GO_MF
Cluster5	dynein complex binding	1	60	2	214	1.78	0.483	O54918	GO_MF
Cluster5	electron transfer activity	1	60	1	214	3.57	0.28	O70475	GO_MF
Cluster5	endonuclease activity	1	60	2	214	1.78	0.483	O88796	GO_MF
Cluster5	endopeptidase inhibitor activity	1	60	2	214	1.78	0.483	O88738	GO_MF
Cluster5	endopeptidase regulator activity	1	60	2	214	1.78	0.483	O88738	GO_MF
Cluster5	endoribonuclease activity	1	60	2	214	1.78	0.483	O88796	GO_MF
Cluster5	enzyme activator activity	8	60	17	214	1.68	0.0661	P05627 Q60949 Q8BHL3 Q8BQZ4 Q8C180 Q8CGF1 Q9QWY8 Q9QY06	GO_MF
Cluster5	enzyme binding	21	60	78	214	0.96	0.665	O54918 P05627 P54726 P81122 Q04863 Q3TN34 Q5XJE5 Q60949 Q61165 Q6NVE8 Q6PAM0 Q80V62 Q8BHL3 Q8C180 Q8C8R3 Q8K382 Q8R1A4 Q9D4J7 Q9DBR4 Q9QY06 Q9WVS8	GO_MF
Cluster5	enzyme inhibitor activity	3	60	7	214	1.53	0.307	O88738 Q3TLD5 Q9Z131	GO_MF
Cluster5	enzyme regulator activity	11	60	25	214	1.57	0.0526	O88738 P05627 Q3TLD5 Q60949 Q8BHL3 Q8BQZ4 Q8C180 Q8CGF1 Q9QWY8 Q9QY06 Q9Z131	GO_MF
Cluster5	fibroblast growth factor receptor binding	1	60	1	214	3.57	0.28	Q8C180	GO_MF
Cluster5	filamin binding	1	60	1	214	3.57	0.28	Q3TN34	GO_MF
Cluster5	G protein-coupled receptor activity	1	60	1	214	3.57	0.28	Q8BUH8	GO_MF
Cluster5	gated channel activity	1	60	3	214	1.19	0.629	O70496	GO_MF
Cluster5	glutamate receptor binding	1	60	2	214	1.78	0.483	Q80U72	GO_MF
Cluster5	growth factor receptor binding	1	60	3	214	1.19	0.629	Q8C180	GO_MF
Cluster5	GTPase activator activity	7	60	14	214	1.78	0.0612	P05627 Q60949 Q8BHL3 Q8BQZ4 Q8CGF1 Q9QWY8 Q9QY06	GO_MF
Cluster5	GTPase binding	9	60	32	214	1	0.571	P81122 Q3TN34 Q60949 Q6NVE8 Q8BHL3 Q8C180 Q8K382 Q8R1A4 Q9QY06	GO_MF
Cluster5	GTPase regulator activity	7	60	14	214	1.78	0.0612	P05627 Q60949 Q8BHL3 Q8BQZ4 Q8CGF1 Q9QWY8 Q9QY06	GO_MF
Cluster5	guanyl-nucleotide exchange factor activity	3	60	14	214	0.76	0.807	P81122 Q8C180 Q8K382	GO_MF
Cluster5	guanylate kinase activity	1	60	2	214	1.78	0.483	Q80U72	GO_MF
Cluster5	heterocyclic compound binding	16	60	68	214	0.84	0.879	O88796 P05627 P54726 P70399 P70459 Q04863 Q3UYV9 Q6PFR5 Q80WC3 Q8K019 Q9D0F4 Q9D4J7 Q9DBY0 Q9JL61 Q9QY06 Q9WVS8	GO_MF
Cluster5	histone acetyltransferase binding	1	60	2	214	1.78	0.483	Q9DBR4	GO_MF
Cluster5	histone binding	2	60	7	214	1.02	0.631	P70399 Q9D4J7	GO_MF
Cluster5	histone deacetylase binding	1	60	3	214	1.19	0.629	Q9D4J7	GO_MF
Cluster5	HMG box domain binding	1	60	2	214	1.78	0.483	P05627	GO_MF
Cluster5	hydrolase activity	3	60	22	214	0.49	0.974	O88796 P33174 Q9QY06	GO_MF
Cluster5	hydrolase activity, acting on acid anhydrides	2	60	13	214	0.55	0.922	P33174 Q9QY06	GO_MF
Cluster5	hydrolase activity, acting on ester bonds	1	60	5	214	0.71	0.811	O88796	GO_MF
Cluster5	identical protein binding	9	60	29	214	1.11	0.426	P05627 Q04863 Q61191 Q69Z38 Q6PAM0 Q6PFR5 Q80TM9 Q8CFD4 Q9DBY0	GO_MF
Cluster5	inorganic anion transmembrane transporter activity	2	60	3	214	2.38	0.19	O70496 Q99LI2	GO_MF
Cluster5	insulin receptor binding	1	60	2	214	1.78	0.483	P81122	GO_MF
Cluster5	integrin binding	2	60	5	214	1.43	0.432	P98078 Q80TM9	GO_MF
Cluster5	ion binding	8	60	29	214	0.98	0.602	P98078 Q61165 Q6PCL9 Q8CFD4 Q8K382 Q9QWY8 Q9QY06 Q9WVS8	GO_MF
Cluster5	ion channel activity	2	60	5	214	1.43	0.432	O70496 Q99LI2	GO_MF
Cluster5	ion channel binding	1	60	1	214	3.57	0.28	Q8C8R3	GO_MF
Cluster5	ion gated channel activity	1	60	3	214	1.19	0.629	O70496	GO_MF
Cluster5	ion transmembrane transporter activity	3	60	7	214	1.53	0.307	O70496 Q61165 Q99LI2	GO_MF
Cluster5	ionotropic glutamate receptor binding	1	60	2	214	1.78	0.483	Q80U72	GO_MF
Cluster5	kinase activity	6	60	20	214	1.07	0.51	P81122 Q69Z38 Q6PAM0 Q80U72 Q8C180 Q9WVS8	GO_MF
Cluster5	kinase binding	8	60	25	214	1.14	0.398	O54918 P54726 P81122 Q04863 Q6PAM0 Q8C180 Q8C8R3 Q9WVS8	GO_MF
[truncated: 345 more rows]

## Sheet: Domain
Table SVI. Protein domain enrichment analysis by cluster.
[truncated: 246 more rows]
